# Supplementary material for: A computational study to determine whether substituents make E13nitrogen (E13 = B, Al, Ga, In, and Tl) triple bonds synthetically accessible
Source: Royal Society of Chemistry journal article supplement (doi:10.1039/c9ra00318e), 2019-01-01
Supplement: c9ra00318e1.pdf [file c9ra00318e1.pdf]

# Supporting Information

## A Computational Study to Determine Whether Substituents Make $E_{13}\equiv$ Nitrogen ( $E_{13} = B, Al, Ga, In,$ and $Tl$ ) Triple Bonds Synthetically Accessible?

Shi-Lin Zhang,<sup>1</sup> Ming-Chung Yang,<sup>1</sup> and Ming-Der Su<sup>1,2\*</sup>

<sup>1</sup>Department of Applied Chemistry, National Chiayi University, Chiayi 60004, Taiwan

<sup>2</sup>Department of Medicinal and Applied Chemistry, Kaohsiung Medical University, Kaohsiung 80708, Taiwan

\*Email: midesu@mail.ncyu.edu.tw

|                                                                        |     |
|------------------------------------------------------------------------|-----|
| <b>Theoretical Methods</b>                                             | S2  |
| <b>References</b>                                                      | S3  |
| <b>Figure S1</b> $L'-B\equiv N-L'$ ( $L' = SiMe(Si^iBu_3)_2$ )         | S7  |
| <b>Figure S2</b> $L'-B\equiv N-L'$ ( $L' = Si^iPrDis_2$ )              | S8  |
| <b>Figure S3</b> $L'-B\equiv N-L'$ ( $L' = Tbt$ )                      | S9  |
| <b>Figure S4</b> $L'-B\equiv N-L'$ ( $L' = Ar^*$ )                     | S10 |
| <b>Table S1</b> $L-Al\equiv N-L$ ( $L = F, OH, H, CH_3,$ and $SiH_3$ ) | S11 |
| <b>Table S2</b> $L-Ga\equiv N-L$ ( $L = F, OH, H, CH_3,$ and $SiH_3$ ) | S12 |
| <b>Table S3</b> $L-In\equiv N-L$ ( $L = F, OH, H, CH_3,$ and $SiH_3$ ) | S13 |

|                                                                                                                                |     |
|--------------------------------------------------------------------------------------------------------------------------------|-----|
| <b>Table S4</b> L-Tl≡N-L (L = F, OH, H, CH <sub>3</sub> , and SiH <sub>3</sub> )                                               | S14 |
| <b>Table S5</b> L'-Al≡N-L' (L' = SiMe(Si <i>t</i> Bu <sub>3</sub> ) <sub>2</sub> , Si <i>i</i> PrDis <sub>2</sub> , Tbt, Ar*)  | S18 |
| <b>Table S6</b> L'-Ga≡N-L' (L' = SiMe(Si <i>t</i> Bu <sub>3</sub> ) <sub>2</sub> , Si <i>i</i> PrDis <sub>2</sub> , Tbt, Ar*)  | S20 |
| <b>Table S7</b> L'-In≡N-L' (L' = SiMe(Si <i>t</i> Bu <sub>3</sub> ) <sub>2</sub> , Si <i>i</i> PrDis <sub>2</sub> , Tbt, Ar*)  | S22 |
| <b>Table S8</b> L'-Tl≡N-L' (L' = SiMe(Si <i>t</i> Bu <sub>3</sub> ) <sub>2</sub> , Si <i>i</i> PrDis <sub>2</sub> , Tbt, Ar*)  | S24 |
| <b>Table S9</b> L'-Al≡N-L' (L' = SiMe(Si <i>t</i> Bu <sub>3</sub> ) <sub>2</sub> , Si <i>i</i> PrDis <sub>2</sub> , Tbt, Ar*)  | S26 |
| <b>Table S10</b> L'-Ga≡N-L' (L' = SiMe(Si <i>t</i> Bu <sub>3</sub> ) <sub>2</sub> , Si <i>i</i> PrDis <sub>2</sub> , Tbt, Ar*) | S28 |
| <b>Table S11</b> L'-In≡N-L' (L' = SiMe(Si <i>t</i> Bu <sub>3</sub> ) <sub>2</sub> , Si <i>i</i> PrDis <sub>2</sub> , Tbt, Ar*) | S30 |
| <b>Table S12</b> L'-Tl≡N-L' (L' = SiMe(Si <i>t</i> Bu <sub>3</sub> ) <sub>2</sub> , Si <i>i</i> PrDis <sub>2</sub> , Tbt, Ar*) | S32 |
| <b>Figure S5</b> L'-Al≡N-L' (L' = SiMe(Si <i>t</i> Bu <sub>3</sub> ) <sub>2</sub> )                                            | S34 |
| <b>Figure S6</b> L'-Al≡N-L' (L' = Si <i>i</i> PrDis <sub>2</sub> )                                                             | S35 |
| <b>Figure S7</b> L'-Al≡N-L' (L' = Tbt)                                                                                         | S36 |
| <b>Figure S8</b> L'-Al≡N-L' (L' = Ar*)                                                                                         | S37 |
| <b>Figure S9</b> L'-Ga≡N-L' (L' = SiMe(Si <i>t</i> Bu <sub>3</sub> ) <sub>2</sub> )                                            | S38 |
| <b>Figure S10</b> L'-Ga≡N-L' (L' = Si <i>i</i> PrDis <sub>2</sub> )                                                            | S39 |
| <b>Figure S11</b> L'-Ga≡N-L' (L' = Tbt)                                                                                        | S40 |
| <b>Figure S12</b> L'-Ga≡N-L' (L' = Ar*)                                                                                        | S41 |
| <b>Figure S13</b> L'-In≡N-L' (L' = SiMe(Si <i>t</i> Bu <sub>3</sub> ) <sub>2</sub> )                                           | S42 |
| <b>Figure S14</b> L'-In≡N-L' (L' = Si <i>i</i> PrDis <sub>2</sub> )                                                            | S43 |
| <b>Figure S15</b> L'-In≡N-L' (L' = Tbt)                                                                                        | S44 |
| <b>Figure S16</b> L'-In≡N-L' (L' = Ar*)                                                                                        | S45 |
| <b>Figure S17</b> L'-Tl≡N-L' (L' = SiMe(Si <i>t</i> Bu <sub>3</sub> ) <sub>2</sub> )                                           | S36 |
| <b>Figure S18</b> L'-Tl≡N-L' (L' = Si <i>i</i> PrDis <sub>2</sub> )                                                            | S37 |
| <b>Figure S19</b> L'-Tl≡N-L' (L' = Tbt)                                                                                        | S48 |
| <b>Figure S20</b> L'-Tl≡N-L' (L' = Ar*)                                                                                        | S49 |
| <b>Cartesian Coordinates</b>                                                                                                   | S50 |

## Theoretical Methods

Using the Gaussian 09 program package,<sup>1</sup> all geometries are fully optimized using hybrid density functional theory at the M06-2X,<sup>2</sup> B3LYP,<sup>3,4</sup> and B3PW91<sup>4,5</sup> levels, in conjunction with the Def2-TZVP<sup>6</sup> and LANL2DZ+dp<sup>7</sup> basis sets. These DFT calculations are signified as M06-2X/Def2-TZVP, B3PW91/Def2-TZVP and B3LYP/LANL2DZ+dp, respectively. In order to confirm that the reactants and products have no imaginary frequencies and that the transition states possess only one imaginary frequency, frequency calculations were performed for all structures. Thermodynamic corrections to 298 K, heat capacity corrections and entropy corrections ( $\Delta S$ ) are applied to the three levels of DFT. The relative free energy ( $\Delta G$ ) at 298 K is also computed at the same levels of theory.

Next,  $\text{Si}i\text{PrDis}_2\text{-E}_{13}\equiv\text{N-Si}i\text{PrDis}_2$ ,  $\text{Tbt-E}_{13}\equiv\text{N-Tbt}$ , and  $\text{Ar}^*\text{-E}_{13}\equiv\text{N-Ar}^*$  are the model reactants for this study. It is known that the B3LYP functional fails to describe nonvalent interactions, such as the London dispersion correctly. As a result, for large ligands, calculations were performed using dispersion-corrected M06-2X method.<sup>2</sup> Because of the limitations of the available memory size and CPU time, frequencies are not computed at the M06-2X/Def2-TZVP level of theory for the triply bonded  $\text{L}'\text{-Tl}\equiv\text{N-R}'$  systems that have bulky ligands ( $\text{L}'$ ), so the zero-point energies and the Gibbs free energies that are derived using M06-2X/Def2-TZVP cannot be used for these systems.

## References:

- (1) Frisch, M. J.; Trucks, G. W.; Schlegel, H. B.; Scuseria, G. E.; Robb, M. A.; Cheeseman, J. R.; Scalmani, G.; Barone, V.; Mennucci, B.; Petersson, G. A.; Nakatsuji, H.; Caricato, M.; Li, X.; Hratchian, H. P.; Izmaylov, A. F.; Bloino, J.; Zheng, G.; Sonnenberg, J. L.; Hada, M.; Ehara, M.; Toyota, K.; Fukuda, R.; Hasegawa, J.; Ishida, M.; Nakajima, T.; Honda, Y.; Kitao, O.; Nakai, H.; Vreven, T.; Montgomery, Jr., J. A.; Peralta, J. E.; Ogliaro, F.; Bearpark, M.; Heyd, J. J.; Brothers, E.; Kudin, K. N.; Staroverov, V. N.; Keith, T.; Kobayashi, R.; Normand, J.; Raghavachari, K.; Rendell, A.; Burant, J. C.; Iyengar, S. S.; Tomasi, J.; Cossi, M.; Rega, N.; Millam, J. M.; Klene, M.; Knox, J. E.; Cross, J. B.; Bakken, V.; Adamo, C.; Jaramillo, J.; Gomperts, R.; Stratmann, R. E.; Yazyev, O.; Austin, A. J.; Cammi, R.; Pomelli, C.; Ochterski, J. W.; Martin, R. L.; Morokuma, K.; Zakrzewski, V. G.; Voth, G. A.; Salvador, P.; Dannenberg, J. J.; Dapprich, S.; Daniels, A. D.; Farkas, O.; Foresman, J. B.; Ortiz, J. V.; Cioslowski, J. and Fox, D. J. *Gaussian, Inc.*, Wallingford CT, 2013.
- (2) Zhao, Y.; Truhlar, D. G. *Acc. Chem. Res.* **2008**, *41*, 157-167.
- (3) (a) Becke, A. D. *Phys. Rev. A* **1988**, *38*, 3098-3100. (b) Becke, A. D. *J. Chem. Phys.* **1993**, *98*, 5648-5652.
- (4) Lee, C.; Yang, W.; Parr, R. G. *Phys. Rev. B* **1988**, *37*, 785-789.
- (5) Perdew, J. P.; Wang, Y. *Phys. Rev.* **1992**, *B45*, 13244-13249.
- (6) Weigend, F.; Ahlrichs, R. *Phys. Chem. Chem. Phys.* **2005**, *7*, 3297-3305.
- (7) (a) Dunning, T. H., Jr.; Hay, P. J. In *Modern Theoretical Chemistry*, Schaefer, H. F., III, Ed.; Plenum: New York, 1976; p1-28. (b) Hay, P. J.; Wadt, W. R. *J. Chem. Phys.* 1985, *82*, 270-283. (c) Hay, P. J.; Wadt, W. R. *J. Chem. Phys.* 1985, *82*, 284-298. (d) Hay, P. J.; Wadt, W. R. *J. Chem. Phys.* 1985, *82*, 299-310. (e) Check, C. E.; Faust, T. O.; Bailey, J. M.;

Wright, B. J.; Gilbert, T. M.; Sunderlin, L. S. *J. Phys. Chem. A* 2001, *105*, 8111-8116.

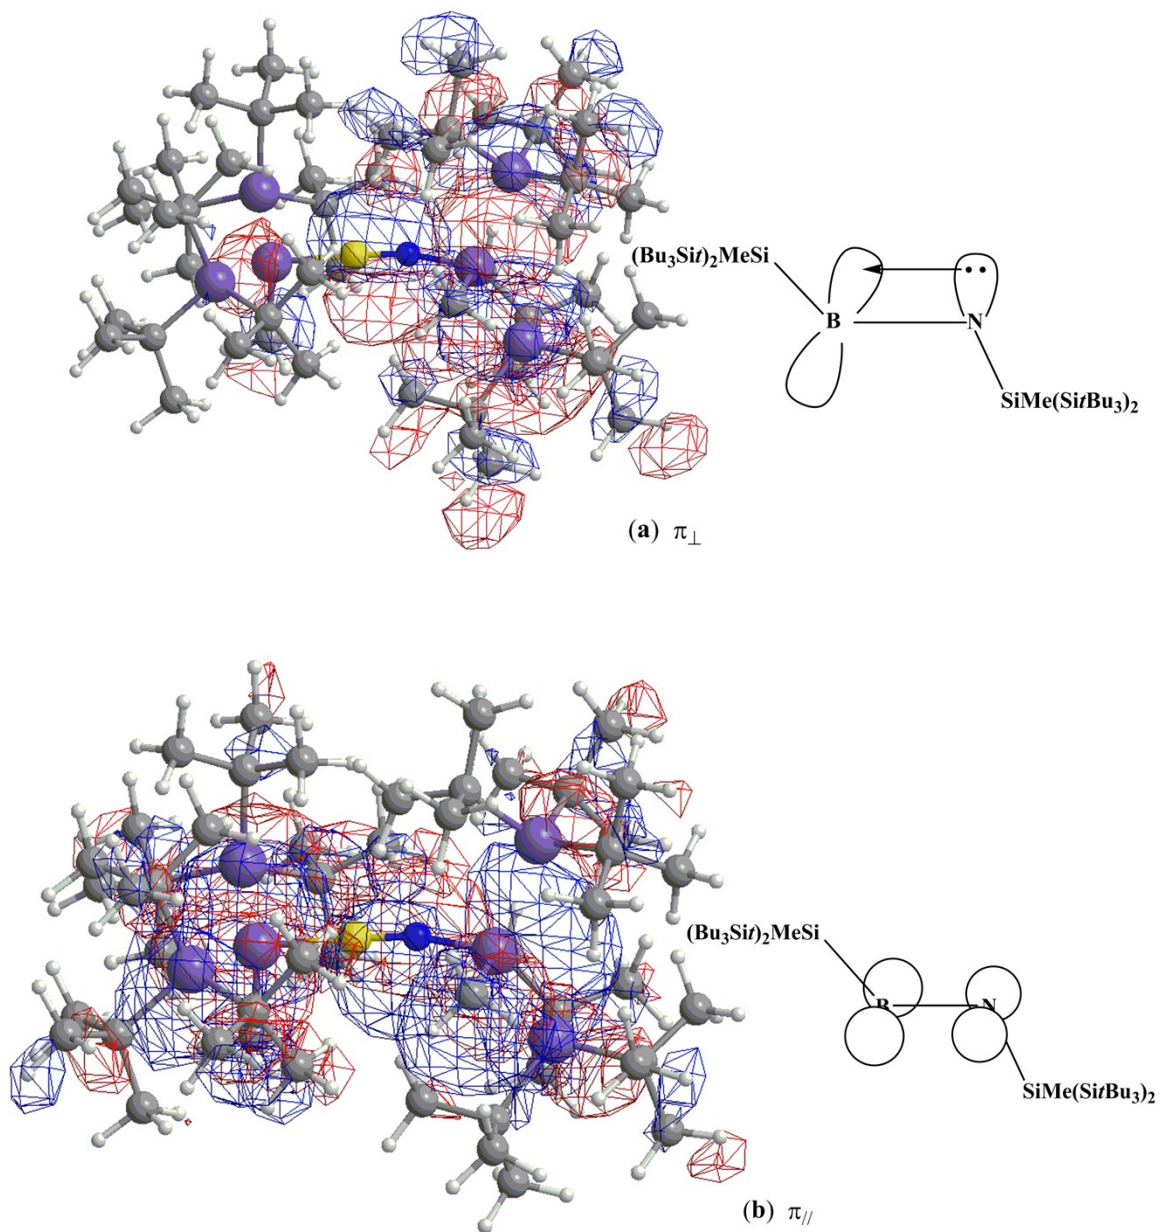

Figure S1: The natural B $\equiv$ N  $\pi$  bonding orbitals ( $\pi_{\perp}$  (a) and  $\pi_{\parallel}$  (b)) for (SiMe(SiBu<sub>3</sub>)<sub>2</sub>)-Tl $\equiv$ N-(SiMe(SiBu<sub>3</sub>)<sub>2</sub>). Also see Figure 1.

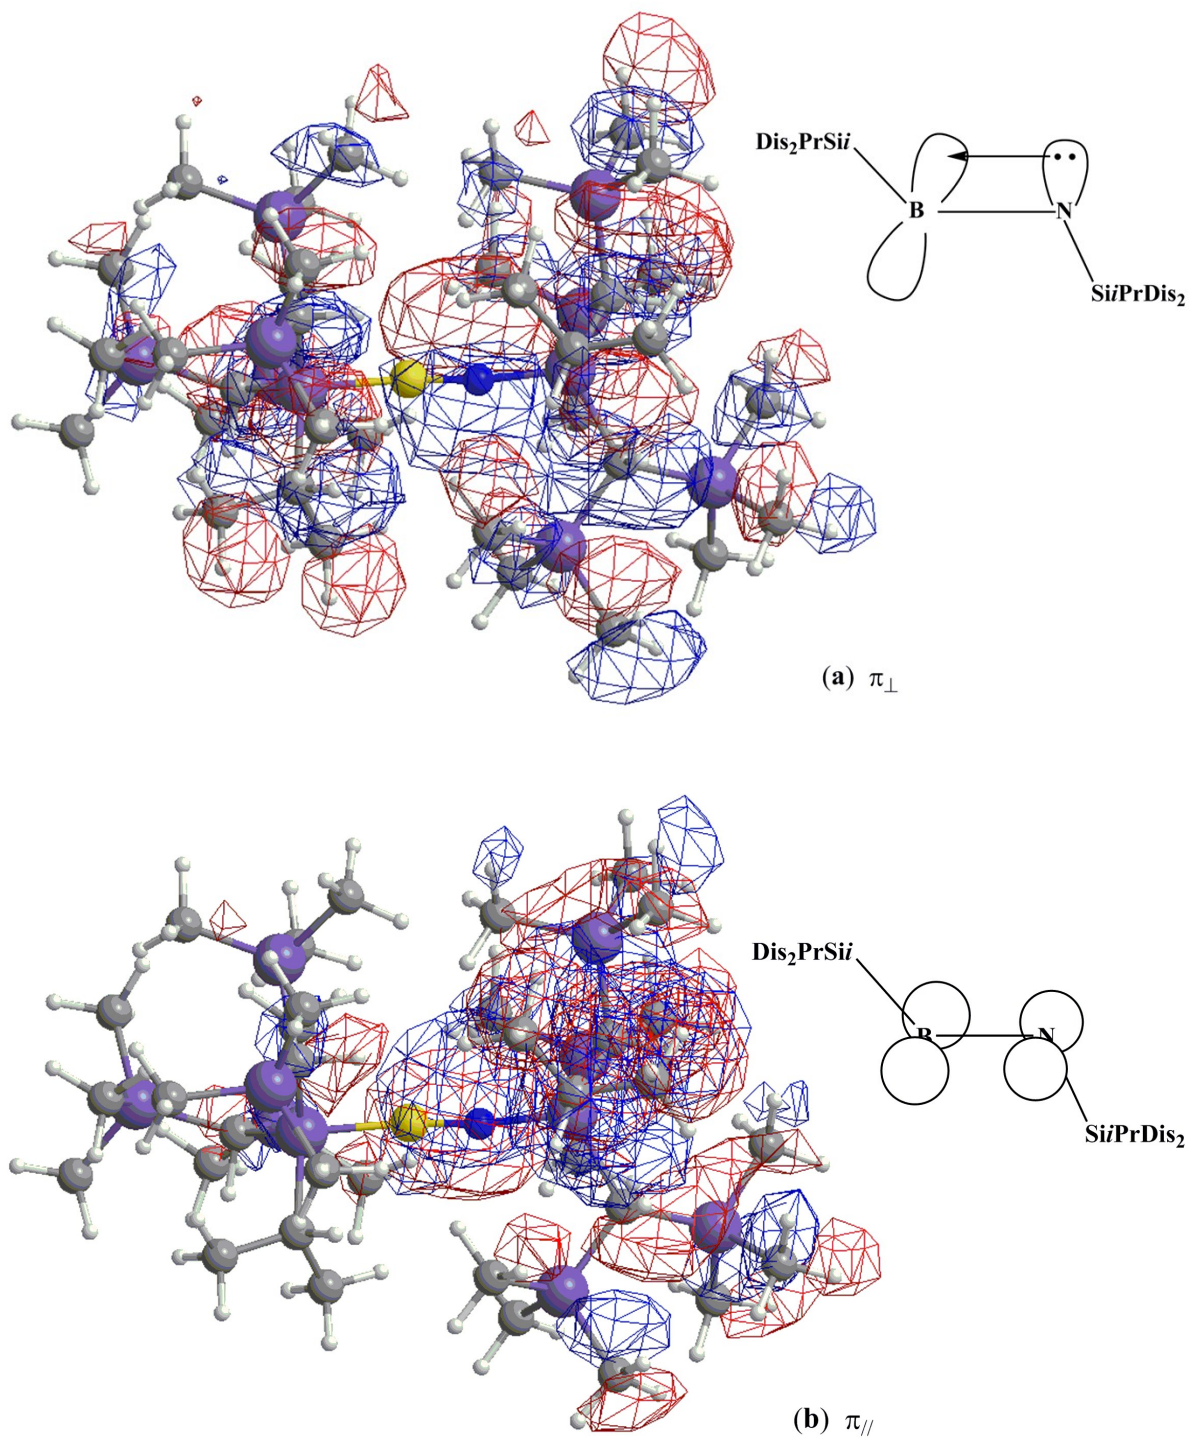

Figure S2: The natural B≡N  $\pi$  bonding orbitals ( $\pi_{\perp}$  (a) and  $\pi_{\parallel}$  (b)) for (SiPrDis<sub>2</sub>)-B≡N-(SiPrDis<sub>2</sub>). Also see Figure 1.

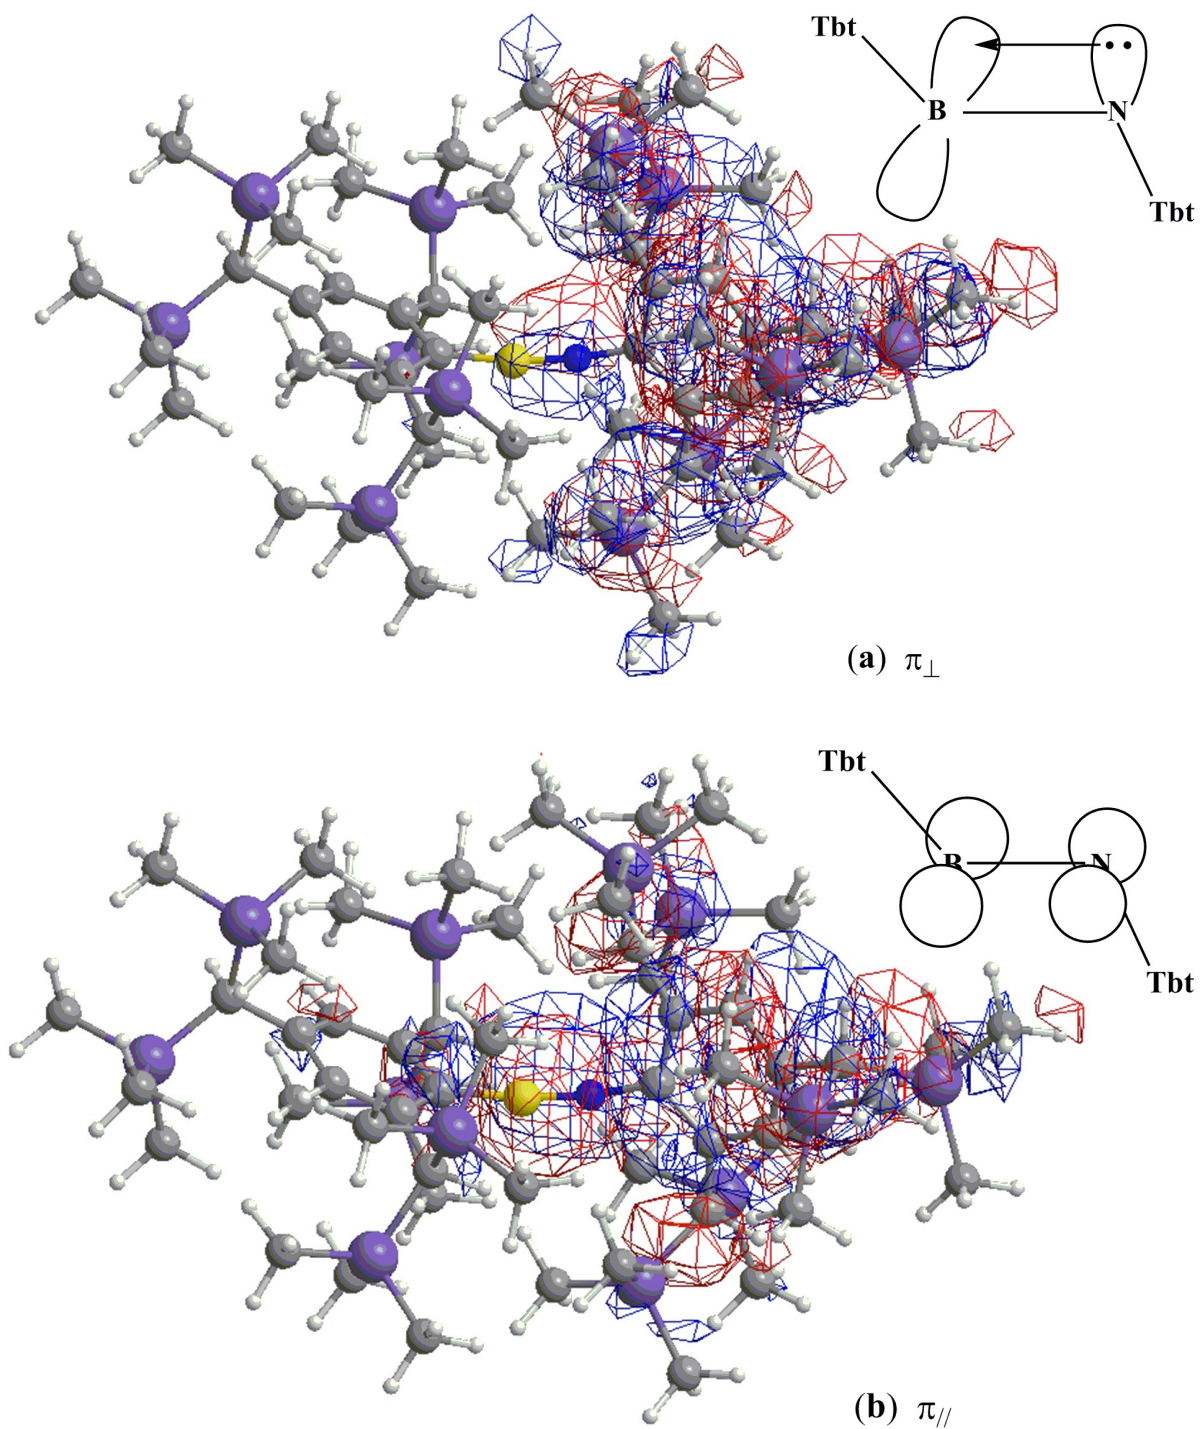

Figure S3: The natural B≡N  $\pi$  bonding orbitals ( $\pi_{\perp}$  (a) and  $\pi_{\parallel}$  (b)) of (Tbt)<sub>2</sub>B≡N-(Tbt). For comparison, also see Figure 1.



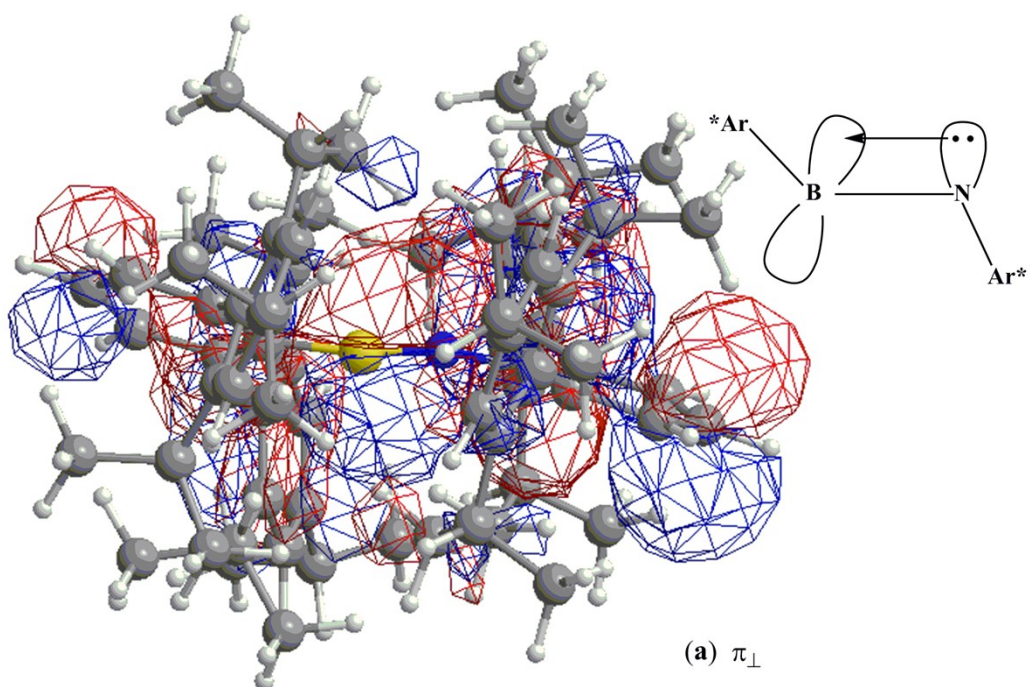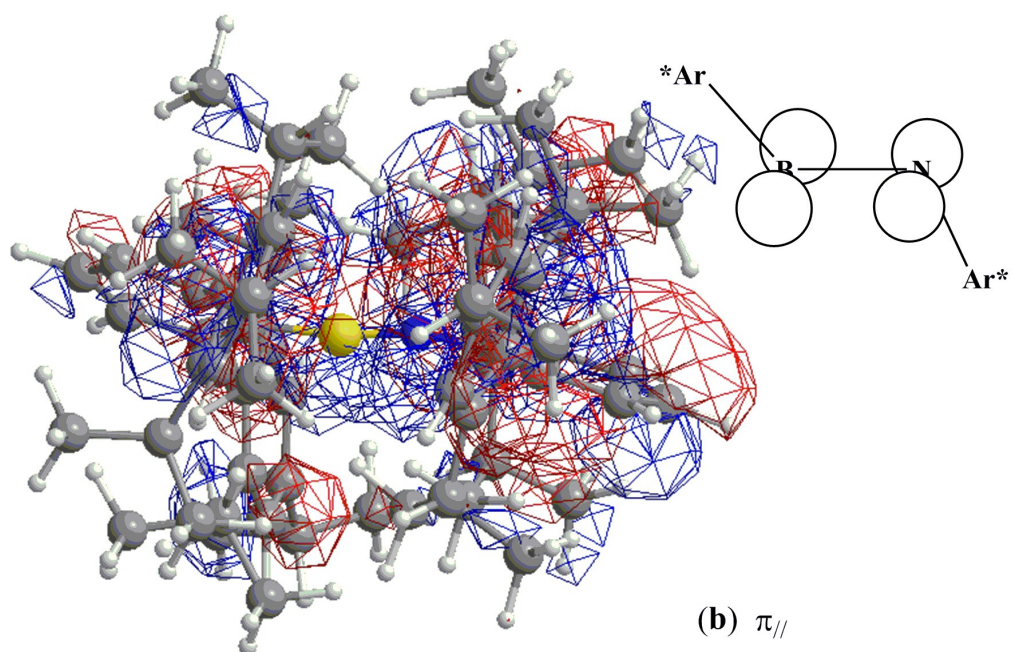

Figure S4: The natural  $\text{B}\equiv\text{N}$   $\pi$  bonding orbitals ( $\pi_{\perp}$  (a) and  $\pi_{\parallel}$  (b)) of  $(\text{Ar}^*)\text{-B}\equiv\text{N}\text{-}(\text{Ar}^*)$ . For comparison, also see Figure 1.

# Table S1

The major geometrical parameters, the natural charge densities ( $Q_{\text{Al}}$  and  $Q_{\text{N}}$ ), the singlet-triplet energy splitting ( $\Delta E_{\text{Al}}$  and  $\Delta E_{\text{N}}$ ), the HOMO-LUMO energy gaps, the binding energies (BE), and the Wiberg bond index (WBI) for L-Al $\equiv$ N-L using the M06-2X/Def2-TZVP, B3PW91/Def2-TZVP (in round brackets) and B3LYP/LANL2DZ+dp (in square brackets) levels of theory.

| L                                           | F         | OH        | H         | CH <sub>3</sub> | SiH <sub>3</sub> |
|---------------------------------------------|-----------|-----------|-----------|-----------------|------------------|
| Al $\equiv$ N (Å)                           | 1.752     | 1.753     | 1.649     | 1.632           | 1.655            |
|                                             | (1.727)   | (1.727)   | (1.622)   | (1.618)         | (1.642)          |
|                                             | [1.702]   | [1.695]   | [1.608]   | [1.613]         | [1.636]          |
| $\angle$ L-Al-N (°)                         | 147.8     | 138.0     | 163.3     | 179.4           | 180.0            |
|                                             | (146.6)   | (136.5)   | (168.5)   | (179.8)         | (180.0)          |
|                                             | [150.4]   | [143.5]   | [180]     | [179.1]         | [179.9]          |
| $\angle$ Al-N-L (°)                         | 123.6     | 135.0     | 149.5     | 179.4           | 180.0            |
|                                             | (126.9)   | (138.6)   | (160.5)   | (179.9)         | (180.0)          |
|                                             | [128.0]   | [139.7]   | [179.1]   | [178.8]         | [179.2]          |
| $\angle$ L-Al-N-L (°)                       | 180.0     | 160.7     | 179.5     | 179.0           | 165.3            |
|                                             | (179.3)   | (163.0)   | (180.0)   | (177.7)         | (171.7)          |
|                                             | [180.0]   | [164.7]   | [170.4]   | [179.7]         | [166.9]          |
| $Q_{\text{Al}}$                             | 0.9462    | 0.6999    | 0.6724    | 0.3896          | 0.2064           |
|                                             | (0.6605)  | (0.5247)  | (0.3937)  | (0.3174)        | (0.3500)         |
|                                             | [0.6986]  | [0.5702]  | [0.3871]  | [0.3453]        | [0.3240]         |
| $Q_{\text{N}}$                              | -0.4236   | -0.4914   | -0.7205   | -0.5466         | -0.5525          |
|                                             | (-0.2307) | (-0.3337) | (-0.5978) | (-0.3488)       | (-0.3794)        |
|                                             | [-0.2492] | [-0.3384] | [-0.6122] | [-0.3633]       | [-0.4074]        |
| $\Delta E_{\text{Al}}$ for Al<br>(kcal/mol) | 74.41     | 68.50     | 41.41     | 45.59           | 32.36            |
|                                             | (72.09)   | (66.72)   | (39.34)   | (43.43)         | (29.17)          |
|                                             | [80.43]   | [73.47]   | [44.33]   | [48.82]         | [33.47]          |

|                                  |                                |                                |                                |                             |                             |
|----------------------------------|--------------------------------|--------------------------------|--------------------------------|-----------------------------|-----------------------------|
| $\Delta E_N$ for N<br>(kcal/mol) | -46.00<br>(-48.48)<br>[-45.47] | -21.39<br>(-21.68)<br>[-19.91] | -50.89<br>(-55.08)<br>[-49.44] | 46.76<br>(48.23)<br>[50.99] | 44.87<br>(46.86)<br>[48.02] |
| HOMO - LUMO<br>(kcal/mol)        | 67.24<br>(68.61)<br>[129.0]    | 68.32<br>(69.21)<br>[119.5]    | 102.8<br>(109.5)<br>[170.1]    | 92.14<br>(96.92)<br>[148.8] | 104.4<br>(105.1)<br>[156.3] |
| BE<br>(kcal/mol)                 | 85.36<br>(83.82)<br>[90.69]    | 84.48<br>(84.71)<br>[90.30]    | 117.0<br>(118.3)<br>[124.9]    | 105.4<br>(107.6)<br>[115.7] | 127.2<br>(129.8)<br>[137.7] |
| WBI                              | 1.307<br>(1.378)<br>[1.348]    | 1.283<br>(1.347)<br>[1.354]    | 1.393<br>(1.470)<br>[1.406]    | 1.315<br>(1.353)<br>[1.311] | 1.128<br>(1.174)<br>[1.122] |

(1) The natural charge density on the aluminum atom; (2) The natural charge density on the nitrogen atom; (3)  $\Delta E_{Al} = E(\text{triplet state for } L \square Al) - E(\text{singlet state for } L \square Al)$ ; (4)  $\Delta E_N = E(\text{triplet state for } L \square N) - E(\text{singlet state for } L \square N)$  and (5)  $BE = E(\text{singlet state for } L \square Al) + E(\text{triplet state for } L \square N) - E(\text{singlet state for } L-Al \equiv N-L)$ . (6) The Wiberg bond index (WBI) for the  $Al \equiv N$  bond: see reference (69,70).

# Table S2

The major geometrical parameters, the natural charge densities ( $Q_{\text{Ga}}$  and  $Q_{\text{N}}$ ), the singlet-triplet energy splitting ( $\Delta E_{\text{Ga}}$  and  $\Delta E_{\text{N}}$ ), the HOMO-LUMO energy gaps, the binding energies (BE), and the Wiberg bond index (WBI) for L-Ga $\equiv$ N-L using the M06-2X/Def2-TZVP, B3PW91/Def2-TZVP (in round brackets) and B3LYP/LANL2DZ+dp (in square brackets) levels of theory.

| L                                           | F         | OH        | H         | CH <sub>3</sub> | SiH <sub>3</sub> |
|---------------------------------------------|-----------|-----------|-----------|-----------------|------------------|
| Ga $\equiv$ N (Å)                           | 1.780     | 1.792     | 1.677     | 1.669           | 1.662            |
|                                             | (1.793)   | (1.804)   | (1.694)   | (1.679)         | (1.672)          |
|                                             | [1.796]   | [1.799]   | [1.697]   | [1.680]         | [1.681]          |
| $\angle$ L-Ga-N (°)                         | 148.7     | 138.4     | 161.8     | 157.4           | 178.2            |
|                                             | (158.0)   | (140.1)   | (164.1)   | (159.5)         | (175.9)          |
|                                             | [160.7]   | [143.9]   | [164.1]   | [161.7]         | [179.6]          |
| $\angle$ Ga-N-L (°)                         | 119.2     | 129.4     | 131.4     | 151.3           | 176.2            |
|                                             | (114.7)   | (126.9)   | (122.0)   | (146.1)         | (168.1)          |
|                                             | [112.9]   | [125.9]   | [127.0]   | [151.2]         | [178.7]          |
| $\angle$ L-Ga-N-L (°)                       | 180.0     | 159.1     | 179.7     | 179.8           | 175.8            |
|                                             | (180.0)   | (158.6)   | (180.0)   | (179.9)         | (166.4)          |
|                                             | [180.0]   | [155.2]   | [180.0]   | [178.6]         | [175.0]          |
| $Q_{\text{Ga}}$                             | 0.9674    | 0.6360    | 0.6475    | 0.4227          | 0.1796           |
|                                             | (0.6484)  | (0.4678)  | (0.2801)  | (0.2604)        | (0.2568)         |
|                                             | [0.8312]  | [0.6558]  | [0.4004]  | [0.4983]        | [0.4004]         |
| $Q_{\text{N}}$                              | -0.4077   | -0.4268   | -0.6746   | -0.5541         | -0.4913          |
|                                             | (-0.1937) | (-0.2894) | (-0.5308) | (-0.3776)       | (-0.4463)        |
|                                             | [-0.2952] | [-0.3764] | [-0.6604] | [-0.4815]       | [-0.5829]        |
| $\Delta E_{\text{Ga}}$ for Ga<br>(kcal/mol) | 85.05     | 76.30     | 46.07     | 49.28           | 35.68            |
|                                             | (89.46)   | (77.73)   | (46.80)   | (48.32)         | (33.92)          |
|                                             | [89.33]   | [78.14]   | [46.66]   | [49.54]         | [32.77]          |

|                                  |                                |                                |                                |                             |                                |
|----------------------------------|--------------------------------|--------------------------------|--------------------------------|-----------------------------|--------------------------------|
| $\Delta E_N$ for N<br>(kcal/mol) | -46.00<br>(-48.48)<br>[-45.47] | -21.39<br>(-21.68)<br>[-19.91] | -50.89<br>(-55.08)<br>[-49.44] | 46.76<br>(48.23)<br>[50.99] | 44.87<br>(46.86)<br>[48.02]    |
| HOMO - LUMO<br>(kcal/mol)        | 72.16<br>(76.70)<br>[136.4]    | 74.45<br>(79.19)<br>[130.5]    | 106.0<br>(111.2)<br>[170.1]    | 91.47<br>(101.7)<br>[152.9] | 108.1<br>(110.0)<br>[158.5]    |
| BE<br>(kcal/mol)                 | 84.97<br>(84.43)<br>[84.86]    | 82.21<br>(81.24)<br>[80.50]    | 112.38<br>(111.25)<br>[111.53] | 97.82<br>(95.47)<br>[98.49] | 120.19<br>(118.59)<br>[121.57] |
| WBI                              | 1.307<br>(1.323)<br>[1.287]    | 1.265<br>(1.283)<br>[1.284]    | 1.448<br>(1.525)<br>[1.455]    | 1.384<br>(1.434)<br>[1.371] | 1.205<br>(1.287)<br>[1.201]    |

(1) The natural charge density on the gallium atom; (2) The natural charge density on the nitrogen atom; (3)  $\Delta E_{Ga} = E(\text{triplet state for } L \square Ga) - E(\text{singlet state for } L \square Ga)$ ; (4)  $\Delta E_N = E(\text{triplet state for } L \square N) - E(\text{singlet state for } L \square N)$  and (5)  $BE = E(\text{singlet state for } L \square Ga) + E(\text{triplet state for } L \square N) - E(\text{singlet state for } L-Ga \equiv N-L)$ . (6) The Wiberg bond index (WBI) for the  $Ga \equiv N$  bond: see reference (69,70).

# Table S3

The major geometrical parameters, the natural charge densities ( $Q_{\text{In}}$  and  $Q_{\text{N}}$ ), the singlet-triplet energy splitting ( $\Delta E_{\text{In}}$  and  $\Delta E_{\text{N}}$ ), the HOMO-LUMO energy gaps, the binding energies (BE), and the Wiberg bond index (WBI) for L-In $\equiv$ N-L using the M06-2X/Def2-TZVP, B3PW91/Def2-TZVP (in round brackets) and B3LYP/LANL2DZ+dp (in square brackets) levels of theory.

| L                                           | F         | OH        | H         | CH <sub>3</sub> | SiH <sub>3</sub> |
|---------------------------------------------|-----------|-----------|-----------|-----------------|------------------|
| In $\equiv$ N (Å)                           | 1.970     | 2.018     | 1.847     | 1.848           | 1.828            |
|                                             | (2.009)   | (2.065)   | (1.887)   | (1.888)         | (1.875)          |
|                                             | [2.009]   | [2.073]   | [1.894]   | [1.894]         | [1.873]          |
| $\angle$ L-In-N (°)                         | 157.6     | 132.7     | 160.5     | 151.7           | 167.1            |
|                                             | (160.8)   | (135.3)   | (165.9)   | (156.5)         | (170.0)          |
|                                             | [160.8]   | [140.4]   | [166.5]   | [157.2]         | [169.7]          |
| $\angle$ In-N-L (°)                         | 115.2     | 127.3     | 125.4     | 142.1           | 152.5            |
|                                             | (112.7)   | (126.1)   | (114.1)   | (135.4)         | (148.3)          |
|                                             | [112.7]   | [123.1]   | [115.2]   | [136.2]         | [145.0]          |
| $\angle$ L-In-N-L (°)                       | 180.0     | 155.8     | 180.0     | 178.1           | 180.0            |
|                                             | (180.0)   | (168.8)   | (180.0)   | (180.0)         | (171.7)          |
|                                             | [180.0]   | [157.5]   | [180.0]   | [178.0]         | [176.9]          |
| $Q_{\text{In}}$                             | 1.1782    | 0.7438    | 0.7966    | 0.5921          | 0.3959           |
|                                             | (0.8271)  | (0.6360)  | (0.4233)  | (0.4646)        | (0.4503)         |
|                                             | [1.0077]  | [0.8227]  | [0.5836]  | [0.7215]        | [0.6325]         |
| $Q_{\text{N}}$                              | -0.4874   | -0.4914   | -0.7205   | -0.5466         | -0.7186          |
|                                             | (-0.2572) | (-0.3337) | (-0.5978) | (-0.3488)       | (-0.5036)        |
|                                             | [-0.3418] | [-0.3384] | [-0.6122] | [-0.3633]       | [-0.6757]        |
| $\Delta E_{\text{In}}$ for In<br>(kcal/mol) | 80.04     | 72.04     | 45.31     | 45.53           | 36.66            |
|                                             | (86.59)   | (73.84)   | (46.80)   | (46.02)         | (35.90)          |
|                                             | [84.22]   | [72.75]   | [44.75]   | [45.05]         | [33.35]          |

|                                  |                                |                                |                                |                             |                             |
|----------------------------------|--------------------------------|--------------------------------|--------------------------------|-----------------------------|-----------------------------|
| $\Delta E_N$ for N<br>(kcal/mol) | -46.00<br>(-48.48)<br>[-45.47] | -21.39<br>(-21.68)<br>[-19.91] | -50.89<br>(-55.08)<br>[-49.44] | 46.76<br>(48.23)<br>[50.99] | 44.87<br>(46.86)<br>[48.02] |
| HOMO - LUMO<br>(kcal/mol)        | 67.20<br>(67.11)<br>[127.4]    | 66.77<br>(70.95)<br>[123.1]    | 90.72<br>(96.87)<br>[142.4]    | 75.90<br>(83.97)<br>[130.6] | 89.98<br>(95.68)<br>[140.3] |
| BE<br>(kcal/mol)                 | 71.73<br>(70.18)<br>[67.51]    | 69.03<br>(66.36)<br>[63.19]    | 93.81<br>(90.59)<br>[88.79]    | 75.91<br>(71.33)<br>[71.63] | 100.3<br>(96.30)<br>[97.58] |
| WBI                              | 1.183<br>(1.165)<br>[1.153]    | 1.084<br>(1.024)<br>[1.024]    | 1.343<br>(1.406)<br>[1.337]    | 1.294<br>(1.321)<br>[1.270] | 1.113<br>(1.182)<br>[1.115] |

(1) The natural charge density on the indium atom; (2) The natural charge density on the nitrogen atom; (3)  $\Delta E_{In} = E(\text{triplet state for } L \square In) - E(\text{singlet state for } L \square In)$ ; (4)  $\Delta E_N = E(\text{triplet state for } L \square N) - E(\text{singlet state for } L \square N)$  and (5)  $BE = E(\text{singlet state for } L \square In) + E(\text{triplet state for } L \square N) - E(\text{singlet state for } L-In \equiv N-L)$ . (6) The Wiberg bond index (WBI) for the  $In \equiv N$  bond: see reference (69,70).

# Table S4

The major geometrical parameters, the natural charge densities ( $Q_{\text{Tl}}$  and  $Q_{\text{N}}$ ), the singlet-triplet energy splitting ( $\Delta E_{\text{Tl}}$  and  $\Delta E_{\text{N}}$ ), the HOMO-LUMO energy gaps, the binding energies (BE), and the Wiberg bond index (WBI) for L-Tl $\equiv$ N-L using the M06-2X/Def2-TZVP, B3PW91/Def2-TZVP (in round brackets) and B3LYP/LANL2DZ+dp (in square brackets) levels of theory.

| L                                           | F         | OH        | H         | CH <sub>3</sub> | SiH <sub>3</sub> |
|---------------------------------------------|-----------|-----------|-----------|-----------------|------------------|
| Tl $\equiv$ N (Å)                           | 2.008     | 2.087     | 1.869     | 1.873           | 1.849            |
|                                             | (2.068)   | (2.207)   | (1.923)   | (1.932)         | (1.917)          |
|                                             | [2.060]   | [2.300]   | [1.927]   | [1.940]         | [1.916]          |
| $\angle$ L-Tl-N (°)                         | 158.0     | 127.3     | 163.7     | 152.0           | 164.9            |
|                                             | (167.6)   | (135.0)   | (169.8)   | (164.8)         | (169.0)          |
|                                             | [172.4]   | [134.5]   | [170.7]   | [162.4]         | [169.2]          |
| $\angle$ Tl-N-L (°)                         | 112.4     | 126.5     | 114.0     | 134.6           | 139.0            |
|                                             | (109.5)   | (123.1)   | (109.4)   | (125.5)         | (132.0)          |
|                                             | [105.5]   | [119.9]   | [109.8]   | [126.5]         | [132.1]          |
| $\angle$ L-Tl-N-L (°)                       | 179.8     | 171.1     | 180.0     | 177.8           | 179.9            |
|                                             | (178.1)   | (157.7)   | (179.9)   | (179.8)         | (179.0)          |
|                                             | [178.6]   | [144.3]   | [179.9]   | [179.7]         | [179.0]          |
| $Q_{\text{Tl}}$                             | 1.0732    | 0.6773    | 0.7244    | 0.5257          | 0.3866           |
|                                             | (0.8345)  | (0.6205)  | (0.4702)  | (0.5899)        | (0.5192)         |
|                                             | [0.9394]  | [0.6721]  | [0.5126]  | [0.6613]        | [0.5049]         |
| $Q_{\text{N}}$                              | -0.4013   | -0.3936   | -0.7202   | -0.6537         | -0.7169          |
|                                             | (-0.2593) | (-0.3503) | (-0.6547) | (-0.5300)       | (-0.5911)        |
|                                             | [-0.2628] | [-0.3054] | [-0.7401] | [-0.5963]       | [-0.6825]        |
| $\Delta E_{\text{Tl}}$ for Tl<br>(kcal/mol) | 102.2     | 86.32     | 54.67     | 48.42           | 42.19            |
|                                             | (103.7)   | (80.73)   | (52.90)   | (44.70)         | (39.66)          |
|                                             | [102.1]   | [82.09]   | [51.15]   | [45.68]         | [37.29]          |



|                                  |                                |                                |                                |                             |                             |
|----------------------------------|--------------------------------|--------------------------------|--------------------------------|-----------------------------|-----------------------------|
| $\Delta E_N$ for N<br>(kcal/mol) | -46.00<br>(-48.48)<br>[-45.47] | -21.39<br>(-21.68)<br>[-19.91] | -50.89<br>(-55.08)<br>[-49.44] | 46.76<br>(48.23)<br>[50.99] | 44.87<br>(46.86)<br>[48.02] |
| HOMO - LUMO<br>(kcal/mol)        | 69.89<br>(70.00)<br>[140.6]    | 67.52<br>(68.21)<br>[132.3]    | 95.56<br>(100.3)<br>[147.5]    | 79.67<br>(88.81)<br>[136.5] | 92.87<br>(97.34)<br>[144.3] |
| BE<br>(kcal/mol)                 | 81.13<br>(76.70)<br>[72.38]    | 73.53<br>(65.39)<br>[62.68]    | 91.74<br>(86.47)<br>[82.67]    | 66.72<br>(59.12)<br>[60.33] | 92.26<br>(87.49)<br>[86.81] |
| WBI                              | 1.077<br>(0.999)<br>[0.987]    | 0.892<br>(0.732)<br>[0.580]    | 1.324<br>(1.341)<br>[1.272]    | 1.266<br>(1.227)<br>[1.230] | 1.134<br>(1.150)<br>[1.090] |

(1) The natural charge density on the thallium atom; (2) The natural charge density on the nitrogen atom; (3)  $\Delta E_{Tl} = E(\text{triplet state for } L \square Tl) - E(\text{singlet state for } L \square Tl)$ ; (4)  $\Delta E_N = E(\text{triplet state for } L \square N) - E(\text{singlet state for } L \square N)$  and (5)  $BE = E(\text{singlet state for } L \square Tl) + E(\text{triplet state for } L \square N) - E(\text{singlet state for } L-Tl \equiv N-L)$ . (6) The Wiberg bond index (WBI) for the  $Tl \equiv N$  bond: see reference (69,70).

# Table S5

The Bond Lengths (Å), Bond Angles (°), Singlet-Triplet Energy Splitting ( $\Delta E_{Al'}$  and  $\Delta E_{N'}$ ), Natural Charge Densities ( $Q_{Al'}$  and  $Q_{N'}$ ), Binding Energies (BE), the Wiberg Bond Index (WBI), HOMO-LUMO Energy Gaps, and Some Reaction Enthalpies for  $L'-Al\equiv N-L'$  at the M06-2X/Def2-TZVP Level of Theory. See also Scheme 2.

| L'                                                     | SiMe(Si <sup>t</sup> Bu <sub>3</sub> ) <sub>2</sub> | Si <sup>t</sup> PrDis <sub>2</sub> | Tbt     | Ar*     |
|--------------------------------------------------------|-----------------------------------------------------|------------------------------------|---------|---------|
| Al≡N(Å)                                                | 1.686                                               | 1.681                              | 1.719   | 1.705   |
| ∠L'-Al-N (°)                                           | 163.4                                               | 169.2                              | 161.3   | 164.2   |
| ∠Al-N-L' (°)                                           | 121.1                                               | 114.6                              | 126.3   | 113.1   |
| ∠L'-Al-N-L' (°)                                        | 180.0                                               | 177.5                              | 176.6   | 172.3   |
| $Q_{Al}$ <sup>(1)</sup>                                | 1.0463                                              | 0.8104                             | 0.8828  | 0.9514  |
| $Q_N$ <sup>(2)</sup>                                   | -0.6761                                             | -0.7543                            | -0.7445 | -0.7324 |
| $\Delta E_{ST}$ for L'-Al<br>(kcal/mol) <sup>(3)</sup> | 20.64                                               | 24.08                              | 18.17   | 19.28   |
| $\Delta E_{ST}$ for L'-N (kcal/mol) <sup>(4)</sup>     | -22.30                                              | -25.05                             | -25.52  | -28.63  |
| HOMO – LUMO<br>(kcal / mol)                            | 57.14                                               | 55.20                              | 78.53   | 29.55   |
| BE (kcal / mol) <sup>(5)</sup>                         | 324.2                                               | 306.8                              | 591.8   | 351.0   |
| $\Delta H_1$ (kcal / mol) <sup>(6)</sup>               | 154.2                                               | 83.52                              | 96.15   | 28.30   |
| $\Delta H_2$ (kcal / mol) <sup>(6)</sup>               | 39.69                                               | 6.460                              | 9.706   | 42.48   |
| WBI <sup>(7)</sup>                                     | 2.111                                               | 2.145                              | 2.117   | 2.182   |

(1) The natural charge density on aluminum. (2) The natural charge density on nitrogen. (3)  $\Delta E_{Al'}$  (kcal mol<sup>-1</sup>) = E(triplet state for L'-Al) –

$E(\text{singlet state for } L'-Al)$ . (4)  $\Delta E_{N'}$  ( $\text{kcal mol}^{-1}$ ) =  $E(\text{triplet state for } L'-N) - E(\text{singlet state for } L'-N)$ . (5)  $BE$  ( $\text{kcal mol}^{-1}$ ) =  $E(\text{triplet state for } L'-Al) + E(\text{triplet state for } L'-N) - E(\text{singlet for } L'-Al \equiv N-L')$ . (6) See Scheme 2. (7) The Wiberg bond index (WBI) for the  $Al \equiv N$  bond: see references (69,70).

# Table S6

The Bond Lengths (Å), Bond Angles (°), Singlet-Triplet Energy Splitting ( $\Delta E_{Ga'}$  and  $\Delta E_{N'}$ ), Natural Charge Densities ( $Q_{Ga'}$  and  $Q_{N'}$ ), Binding Energies (BE), the Wiberg Bond Index (WBI), HOMO-LUMO Energy Gaps, and Some Reaction Enthalpies for L'-Ga≡N-L' at the M06-2X/Def2-TZVP Level of Theory. See also Scheme 2.

| L'                                                  | SiMe(Si <i>t</i> Bu <sub>3</sub> ) <sub>2</sub> | Si <i>i</i> PrDis <sub>2</sub> | Tbt     | Ar*     |
|-----------------------------------------------------|-------------------------------------------------|--------------------------------|---------|---------|
| Ga≡N(Å)                                             | 1.705                                           | 1.698                          | 1.722   | 1.704   |
| ∠L'-Ga-N (°)                                        | 158.6                                           | 166.6                          | 165.2   | 167.8   |
| ∠Ga-N-L' (°)                                        | 135.2                                           | 137.8                          | 129.7   | 130.1   |
| ∠L'-Ga-N-L' (°)                                     | 176.4                                           | 178.3                          | 180.0   | 175.9   |
| $Q_{Ga}^{(1)}$                                      | 0.6855                                          | 0.5227                         | 0.6186  | 0.7607  |
| $Q_N^{(2)}$                                         | -0.7526                                         | -0.8662                        | -0.5930 | -0.7281 |
| $\Delta E_{ST}$ for L'-Ga (kcal/mol) <sup>(3)</sup> | 22.17                                           | 18.81                          | 17.13   | 15.36   |
| $\Delta E_{ST}$ for L'-N (kcal/mol) <sup>(4)</sup>  | -22.30                                          | -25.05                         | -25.52  | -28.63  |
| HOMO – LUMO<br>(kcal / mol)                         | 56.75                                           | 61.82                          | 36.53   | 40.28   |
| BE (kcal / mol) <sup>(5)</sup>                      | 596.7                                           | 484.4                          | 836.1   | 589.5   |
| $\Delta H_1$ (kcal / mol) <sup>(6)</sup>            | 113.7                                           | 111.4                          | 43.55   | 115.4   |
| $\Delta H_2$ (kcal / mol) <sup>(6)</sup>            | 38.79                                           | 1.843                          | 9.015   | 25.12   |
| WBI <sup>(7)</sup>                                  | 2.182                                           | 2.216                          | 2.163   | 2.124   |

(1) The natural charge density on gallium. (2) The natural charge density on nitrogen. (3)  $\Delta E_{Ga'}$  (kcal mol<sup>-1</sup>) = E(triplet state for L'-Ga) – E(singlet state for L'-Ga). (4)  $\Delta E_{N'}$  (kcal mol<sup>-1</sup>) = E(triplet state for

$L'-N) - E(\text{singlet state for } L'-N)$ . (5)  $BE \text{ (kcal mol}^{-1}\text{)} = E(\text{triplet state for } L'-Ga) + E(\text{triplet state for } L'-N) - E(\text{singlet for } L'-Ga\equiv N-L')$ . (6) See Scheme 2. (7) The Wiberg bond index (WBI) for the  $Ga\equiv N$  bond: see references (69,70).

# Table S7

The Bond Lengths (Å), Bond Angles (°), Singlet-Triplet Energy Splitting ( $\Delta E_{In'}$  and  $\Delta E_{N'}$ ), Natural Charge Densities ( $Q_{In'}$  and  $Q_{N'}$ ), Binding Energies (BE), the Wiberg Bond Index (WBI), HOMO-LUMO Energy Gaps, and Some Reaction Enthalpies for  $L'-In\equiv N-L'$  at the M06-2X/Def2-TZVP Level of Theory. See also Scheme 2.

| L'                                                  | SiMe(Si <i>t</i> Bu <sub>3</sub> ) <sub>2</sub> | Si <i>i</i> PrDis <sub>2</sub> | Tbt     | Ar*     |
|-----------------------------------------------------|-------------------------------------------------|--------------------------------|---------|---------|
| In≡N(Å)                                             | 1.879                                           | 1.866                          | 1.902   | 1.876   |
| ∠L'-In-N (°)                                        | 149.7                                           | 146.0                          | 142.9   | 142.0   |
| ∠In-N-L' (°)                                        | 123.3                                           | 121.4                          | 124.3   | 115.8   |
| ∠L'-In-N-L' (°)                                     | 174.7                                           | 177.5                          | 176.8   | 179.8   |
| $Q_{In}^{(1)}$                                      | 0.7760                                          | 0.8198                         | 1.0330  | 1.5298  |
| $Q_N^{(2)}$                                         | -0.8540                                         | -0.9817                        | -0.6503 | -0.7823 |
| $\Delta E_{ST}$ for In<br>(kcal/mol) <sup>(3)</sup> | 21.94                                           | 20.99                          | 16.71   | 18.94   |
| $\Delta E_{ST}$ for N (kcal/mol) <sup>(4)</sup>     | -22.30                                          | -25.05                         | -25.52  | -28.63  |
| HOMO – LUMO<br>(kcal / mol)                         | 43.38                                           | 47.85                          | 45.83   | 34.22   |
| BE (kcal / mol) <sup>(5)</sup>                      | 290.5                                           | 275.5                          | 573.9   | 330.3   |
| $\Delta H_1$ (kcal / mol) <sup>(6)</sup>            | 140.3                                           | 96.26                          | 116.1   | 43.63   |
| $\Delta H_2$ (kcal / mol) <sup>(6)</sup>            | 26.23                                           | -13.17                         | -4.323  | 12.44   |
| WBI <sup>(7)</sup>                                  | 2.206                                           | 2.105                          | 2.152   | 2.213   |

(1) The natural charge density on indium. (2) The natural charge density on nitrogen. (3)  $\Delta E_{In'}$  (kcal mol<sup>-1</sup>) = E(triplet state for L'-In) – E(singlet state for L'-In). (4)  $\Delta E_{N'}$  (kcal mol<sup>-1</sup>) = E(triplet state for L'-N) – E(singlet state for L'-N). (5) BE (kcal mol<sup>-1</sup>) = E(triplet

state for  $L'-In$ ) + E(triplet state for  $L'-N$ ) – E(singlet for  $L'-In\equiv N-L'$ ).  
(6) See Scheme 2. (7) The Wiberg bond index (WBI) for the  $In\equiv N$  bond: see references (69,70).

# Table S8

The Bond Lengths (Å), Bond Angles (°), Singlet□Triplet Energy Splitting ( $\Delta E_{\text{Tl}'}$  and  $\Delta E_{\text{N}'}$ ), Natural Charge Densities ( $Q_{\text{Tl}'}$  and  $Q_{\text{N}'}$ ), Binding Energies (BE), the Wiberg Bond Index (WBI), HOMO□LUMO Energy Gaps, and Some Reaction Enthalpies for  $L'-\text{Tl}\equiv\text{N}-L'$  at the M06-2X/Def2-TZVP Level of Theory. See also Scheme 2.

| <b>L'</b>                                | <b>SiMe(SitBu<sub>3</sub>)<sub>2</sub></b> | <b>SiPrDis<sub>2</sub></b> | <b>Tbt</b> | <b>Ar*</b> |
|------------------------------------------|--------------------------------------------|----------------------------|------------|------------|
| <b>Tl≡N(Å)</b>                           | 1.891                                      | 1.877                      | 1.930      | 1.894      |
| <b>∠R'-Tl-N (°)</b>                      | 150.8                                      | 153.2                      | 150.9      | 151.2      |
| <b>∠Tl-N-R' (°)</b>                      | 121.1                                      | 123.1                      | 122.4      | 113.7      |
| <b>∠R'-Tl-N-R' (°)</b>                   | 177.2                                      | 178.4                      | 180.0      | 177.8      |
| <b>Q<sub>Tl</sub></b>                    | 0.7717                                     | 0.8554                     | 1.1679     | 1.6085     |
| <b>Q<sub>N</sub></b>                     | -0.8789                                    | -0.9938                    | -0.7430    | -0.8202    |
| <b>ΔE<sub>ST</sub> for Tl (kcal/mol)</b> | 24.75                                      | 21.40                      | 19.80      | 19.09      |
| <b>ΔE<sub>ST</sub> for N (kcal/mol)</b>  | -22.30                                     | -25.05                     | -25.52     | -28.63     |
| <b>HOMO – LUMO<br/>(kcal/mol)</b>        | 55.53                                      | 50.83                      | 69.36      | 69.45      |
| <b>BE (kcal/mol)</b>                     | 310.5                                      | 311.8                      | 307.5      | 310.3      |
| <b>ΔH<sub>1</sub> (kcal/mol)</b>         | 110.0                                      | 117.5                      | 90.48      | 48.15      |
| <b>ΔH<sub>2</sub> (kcal/mol)</b>         | 76.14                                      | 81.28                      | 88.33      | 76.34      |
| <b>WBI</b>                               | 2.106                                      | 2.115                      | 2.201      | 2.136      |

(1) The natural charge density on thallium. (2) The natural charge density on nitrogen. (3)  $\Delta E_{\text{Tl}'}$  (kcal mol<sup>-1</sup>) = E(triplet state for L'-Tl) – E(singlet state for L'-Tl). (4)  $\Delta E_{\text{N}'}$  (kcal mol<sup>-1</sup>) = E(triplet state for



$L'-N) - E(\text{singlet state for } L'-N)$ . (5)  $BE \text{ (kcal mol}^{-1}) = E(\text{triplet state for } L'-Tl) + E(\text{triplet state for } L'-N) - E(\text{singlet for } L'-Tl \equiv N-L')$ .

(6) See Scheme 2. (7) The Wiberg bond index (WBI) for the  $Tl \equiv N$  bond: see references (69,70).

# Table S9

The natural bond orbital (NBO) and natural resonance theory (NRT) analysis for L'-Al≡N-R' molecules possessing bulky ligands (L' = SiMe(Si*t*Bu<sub>3</sub>)<sub>2</sub>, Tbt, Si*i*PrDis<sub>2</sub>, and Ar\*) at the M06-2X/Def2-TZVP level of theory.<sup>(1,2)</sup>

| L'-Al≡N-L'                                     | WBI  | NBO Analysis          |                                                                                     |                           | NRT Analysis             |                                                 |
|------------------------------------------------|------|-----------------------|-------------------------------------------------------------------------------------|---------------------------|--------------------------|-------------------------------------------------|
|                                                |      | Occupancy             | Hybridization                                                                       | Polarization              | total / covalent / ionic | Resonance weight                                |
| L' =<br>SiMe(SitBu <sub>3</sub> ) <sub>2</sub> | 2.17 | σ: 1.98               | σ: 0.3429 Al (sp <sup>1.19</sup> ) + 0.9394 N (sp <sup>0.99</sup> )                 | 11.76% (Al)<br>88.24% (N) | 2.57/0.49/2.08           | Al-N : 11.77 %<br>Al=N : 79.06%<br>Al≡N : 9.17% |
|                                                |      | π <sub>⊥</sub> : 1.93 | π <sub>⊥</sub> : 0.3425 Al (sp <sup>16.45</sup> ) + 0.9395 N (sp <sup>97.50</sup> ) | 11.73% (Al)<br>88.27% (N) |                          |                                                 |
|                                                |      | π <sub>∥</sub> : 1.93 | π <sub>∥</sub> : 0.3264 Al (sp <sup>96.05</sup> ) + 0.9452 N (sp <sup>99.99</sup> ) | 10.65% (Al)<br>89.35% (N) |                          |                                                 |
| L' = SitPrDis <sub>2</sub>                     | 2.14 | σ: 1.98               | σ: 0.3490 Al (sp <sup>1.20</sup> ) + 0.9371 N (sp <sup>1.04</sup> )                 | 12.18% (Al)<br>87.82% (N) | 2.68/0.56/2.11           | Al-N : 1.03%<br>Al=N : 23.85%<br>Al≡N : 75.12%  |
|                                                |      | π <sub>⊥</sub> : 1.94 | π <sub>⊥</sub> : 0.3491 Al (sp <sup>46.67</sup> ) + 0.9371 N (sp <sup>99.99</sup> ) | 12.19% (Al)<br>87.81% (N) |                          |                                                 |
|                                                |      | π <sub>∥</sub> : 1.93 | π <sub>∥</sub> : 0.3338 Al (sp <sup>18.74</sup> ) + 0.9427 N (sp <sup>86.19</sup> ) | 11.14% (Al)<br>88.86% (N) |                          |                                                 |
| L' = Tbt                                       | 2.11 | σ: 1.88               | σ: 0.4895 Al (sp <sup>1.76</sup> ) + 0.8720 N (sp <sup>50.41</sup> )                | 23.96% (Al)<br>76.04% (N) | 2.17/0.38/1.78           | Al-N : 83.29%<br>Al=N : 16.71%<br>Al≡N : 0.00%  |
|                                                |      | π <sub>⊥</sub> : 1.90 | π <sub>⊥</sub> : 0.362 Al (sp <sup>47.31</sup> ) + 0.9528 N (sp <sup>99.99</sup> )  | 0% (Al)<br>0% (N)         |                          |                                                 |
|                                                |      | π <sub>∥</sub> : 1.78 | π <sub>∥</sub> : 0.3491 Al (sp <sup>18.74</sup> ) + 0.9712 N (sp <sup>87.38</sup> ) | 0% (Al)<br>0% (N)         |                          |                                                 |
| L' = Ar*                                       | 2.28 | σ: 1.81               | σ: 0.4818 Al (sp <sup>1.29</sup> ) + 0.8763 N (sp <sup>84.71</sup> )                | 23.21% (Al)<br>76.79% (N) | 2.16/0.33/1.83           | Al-N : 49.51 %<br>Al=N : 49.83%<br>Al≡N : 0.66% |
|                                                |      | π <sub>⊥</sub> : 1.89 | π <sub>⊥</sub> : 0.3211 Al (sp <sup>44.56</sup> ) + 0.9153 N (sp <sup>99.99</sup> ) | 0% (Al)<br>0% (N)         |                          |                                                 |
|                                                |      | π <sub>∥</sub> : 1.99 | π <sub>⊥</sub> : 0.3183 Al (sp <sup>19.34</sup> ) + 0.9280 N (sp <sup>88.19</sup> ) | 0% (Al)<br>0% (N)         |                          |                                                 |

(1) The value of the Wiberg bond index (WBI) for the Al≡N bond and the occupancy of the corresponding σ and π bonding NBO (see references (69,70)). (2) NRT; see references (74-76).

# Table S10

The natural bond orbital (NBO) and natural resonance theory (NRT) analysis for L'-Ga≡N-R' molecules possessing bulky ligands (L' = SiMe(Si*t*Bu<sub>3</sub>)<sub>2</sub>, Tbt, Si*i*PrDis<sub>2</sub>, and Ar\*) at the M06-2X/Def2-TZVP level of theory.<sup>(1,2)</sup>

| L'-Ga≡N-L'                                           | WBI  | NBO Analysis          |                                                                                     |                           | NRT Analysis             |                                                 |
|------------------------------------------------------|------|-----------------------|-------------------------------------------------------------------------------------|---------------------------|--------------------------|-------------------------------------------------|
|                                                      |      | Occupancy             | Hybridization                                                                       | Polarization              | total / covalent / ionic | Resonance weight                                |
| L' = SiMe(Si <i>t</i> Bu <sub>3</sub> ) <sub>2</sub> | 2.18 | σ: 1.97               | σ: 0.3736 Ga (sp <sup>1.17</sup> ) + 0.9276 N (sp <sup>1.13</sup> )                 | 13.96% (Ga)<br>86.04% (N) | 2.17/0.55/1.62           | Ga-N : 74.18%<br>Ga=N : 14.12%<br>Ga≡N : 11.70% |
|                                                      |      | π <sub>⊥</sub> : 1.93 | π <sub>⊥</sub> : 0.3520 Ga (sp <sup>9.66</sup> ) + 0.9360 N (sp <sup>33.25</sup> )  | 12.39% (Ga)<br>87.61% (N) |                          |                                                 |
|                                                      |      | π <sub>∥</sub> : 1.93 | π <sub>∥</sub> : 0.3329 Ga (sp <sup>99.99</sup> ) + 0.9429 N (sp <sup>99.99</sup> ) | 11.08% (Ga)<br>88.92% (N) |                          |                                                 |
| L' = Si <i>i</i> PrDis <sub>2</sub>                  | 2.21 | σ: 1.97               | σ: 0.3799 Ga (sp <sup>1.19</sup> ) + 0.9250 N (sp <sup>1.20</sup> )                 | 14.43% (Ga)<br>85.57% (N) | 2.84/0.64/2.20           | Ga-N : 3.08%<br>Ga=N : 10.26%<br>Ga≡N : 86.66%  |
|                                                      |      | π <sub>⊥</sub> : 1.93 | π <sub>⊥</sub> : 0.3696 Ga (sp <sup>16.83</sup> ) + 0.9292 N (sp <sup>35.74</sup> ) | 13.66% (Ga)<br>86.34% (N) |                          |                                                 |
|                                                      |      | π <sub>∥</sub> : 1.93 | π <sub>∥</sub> : 0.3290 Ga (sp <sup>21.83</sup> ) + 0.9443 N (sp <sup>79.29</sup> ) | 10.83% (Ga)<br>89.17% (N) |                          |                                                 |
| L' = Tbt                                             | 2.16 | σ: 1.86               | σ: 0.4792 Ga (sp <sup>1.36</sup> ) + 0.8777 N (sp <sup>22.83</sup> )                | 22.97% (Ga)<br>77.03% (N) | 2.24/0.49/1.75           | Ga-N : 0.00%<br>Ga=N : 75.27%<br>Ga≡N : 24.73%  |
|                                                      |      | π <sub>⊥</sub> : 1.90 | π <sub>⊥</sub> : 0.3439 Ga (sp <sup>15.72</sup> ) + 0.9190 N (sp <sup>36.28</sup> ) | 0.00% (Ga)<br>0.00% (N)   |                          |                                                 |
|                                                      |      | π <sub>∥</sub> : 1.92 | π <sub>∥</sub> : 0.3137 Ga (sp <sup>20.88</sup> ) + 0.9570 N (sp <sup>79.33</sup> ) | 0.00% (Ga)<br>0.00% (N)   |                          |                                                 |
| L' = Ar*                                             | 2.24 | σ: 1.83               | σ: 0.4768 Ga (sp <sup>1.22</sup> ) + 0.8790 N (sp <sup>30.55</sup> )                | 22.74% (Ga)<br>77.26% (N) | 2.27/0.46/1.81           | Ga-N : 56.53%<br>Ga=N : 41.73%<br>Ga≡N : 1.74%  |
|                                                      |      | π <sub>⊥</sub> : 1.93 | π <sub>⊥</sub> : 0.3539 Ga (sp <sup>17.89</sup> ) + 0.9391 N (sp <sup>38.71</sup> ) | 0.00% (Ga)<br>0.00% (N)   |                          |                                                 |
|                                                      |      | π <sub>∥</sub> : 1.92 | π <sub>∥</sub> : 0.3429 Ga (sp <sup>20.83</sup> ) + 0.9388 N (sp <sup>78.92</sup> ) | 0.00% (Ga)<br>0.00% (N)   |                          |                                                 |

(1) The value of the Wiberg bond index (WBI) for the Ga $\equiv$ N bond and the occupancy of the corresponding  $\sigma$  and  $\pi$  bonding NBO (see references (69,70)). (2) NRT; see references (74-76).

# Table S11

The natural bond orbital (NBO) and natural resonance theory (NRT) analysis for L'-In≡N-R' molecules possessing bulky ligands (L' = SiMe(Si*t*Bu<sub>3</sub>)<sub>2</sub>, Tbt, Si*i*PrDis<sub>2</sub>, and Ar\*) at the M06-2X/Def2-TZVP level of theory.<sup>(1,2)</sup>

| L'-In≡N-L'                                           | WBI  | NBO Analysis          |                                                                                     |                           | NRT Analysis             |                                                 |
|------------------------------------------------------|------|-----------------------|-------------------------------------------------------------------------------------|---------------------------|--------------------------|-------------------------------------------------|
|                                                      |      | Occupancy             | Hybridization                                                                       | Polarization              | total / covalent / ionic | Resonance weight                                |
| L' = SiMe(Si <i>t</i> Bu <sub>3</sub> ) <sub>2</sub> | 2.16 | σ: 1.96               | σ: 0.3570 In (sp <sup>1.35</sup> ) + 0.9341 N (sp <sup>1.17</sup> )                 | 12.75% (In)<br>87.25% (N) | 1.89/0.53/1.36           | In-N : 18.85%<br>In=N : 72.99%<br>In≡N : 8.16%  |
|                                                      |      | π <sub>⊥</sub> : 1.90 | π <sub>⊥</sub> : 0.3635 In (sp <sup>5.24</sup> ) + 0.9316 N (sp <sup>99.99</sup> )  | 13.21% (In)<br>86.79% (N) |                          |                                                 |
|                                                      |      | π <sub>∥</sub> : 1.92 | π <sub>∥</sub> : 0.3038 In (sp <sup>99.99</sup> ) + 0.9527 N (sp <sup>99.99</sup> ) | 9.23% (In)<br>90.77% (N)  |                          |                                                 |
| L' = Si <i>i</i> PrDis <sub>2</sub>                  | 2.10 | σ: 1.96               | σ: 0.3695 In (sp <sup>1.31</sup> ) + 0.9292 N (sp <sup>1.29</sup> )                 | 13.65% (In)<br>86.35% (N) | 2.81/0.57/2.24           | In-N : 1.64%<br>In=N : 9.18%<br>In≡N : 89.18%   |
|                                                      |      | π <sub>⊥</sub> : 1.90 | π <sub>⊥</sub> : 0.3744 In (sp <sup>7.35</sup> ) + 0.9273 N (sp <sup>20.00</sup> )  | 14.01% (In)<br>85.99% (N) |                          |                                                 |
|                                                      |      | π <sub>∥</sub> : 1.92 | π <sub>∥</sub> : 0.3025 In (sp <sup>29.43</sup> ) + 0.9531 N (sp <sup>99.99</sup> ) | 9.15% (In)<br>90.85% (N)  |                          |                                                 |
| L' = Tbt                                             | 2.15 | σ: 1.80               | σ: 0.5359 In (sp <sup>1.48</sup> ) + 0.8443 N (sp <sup>78.75</sup> )                | 28.72% (In)<br>71.28% (N) | 2.18/0.48/1.70           | In-N : 0.77%<br>In=N : 79.39%<br>In≡N : 19.84%  |
|                                                      |      | π <sub>⊥</sub> : 1.89 | π <sub>⊥</sub> : 0.3822 In (sp <sup>7.62</sup> ) + 0.9417 N (sp <sup>20.00</sup> )  | 0.00% (In)<br>0.00% (N)   |                          |                                                 |
|                                                      |      | π <sub>∥</sub> : 1.93 | π <sub>∥</sub> : 0.3211 In (sp <sup>29.43</sup> ) + 0.9531 N (sp <sup>99.99</sup> ) | 0.00% (In)<br>0.00% (N)   |                          |                                                 |
| L' = Ar*                                             | 2.13 | σ: 1.78               | σ: 0.5104 In (sp <sup>1.09</sup> ) + 0.8600 N (sp <sup>53.66</sup> )                | 26.05% (In)<br>73.95% (N) | 2.20/0.50/1.70           | In-N : 41.12%<br>In=N : 58.47%<br>In≡N : 41.12% |
|                                                      |      | π <sub>⊥</sub> : 1.90 | π <sub>⊥</sub> : 0.3521 In (sp <sup>7.05</sup> ) + 0.8974 N (sp <sup>20.00</sup> )  | 0.00% (In)<br>0.00% (N)   |                          |                                                 |
|                                                      |      | π <sub>∥</sub> : 1.91 | π <sub>∥</sub> : 0.3122 In (sp <sup>29.43</sup> ) + 0.9041 N (sp <sup>99.99</sup> ) | 0.00% (In)<br>0.00% (N)   |                          |                                                 |

(1) The value of the Wiberg bond index (WBI) for the In $\equiv$ N bond and the occupancy of the corresponding  $\sigma$  and  $\pi$  bonding NBO (see references (69,70)). (2) NRT; see references (74-76).

# Table S12

The natural bond orbital (NBO) and natural resonance theory (NRT) analysis for L'-Tl≡N-R' molecules possessing bulky ligands (L' = SiMe(Si*t*Bu<sub>3</sub>)<sub>2</sub>, Tbt, Si*i*PrDis<sub>2</sub>, and Ar\*) at the M06-2X/Def2-TZVP level of theory.<sup>(1,2)</sup>

| L'-Tl≡N-L'                                           | WBI  | NBO Analysis          |                                                                                     |                           | NRT Analysis             |                                                |
|------------------------------------------------------|------|-----------------------|-------------------------------------------------------------------------------------|---------------------------|--------------------------|------------------------------------------------|
|                                                      |      | Occupancy             | Hybridization                                                                       | Polarization              | total / covalent / ionic | Resonance weight                               |
| L' = SiMe(Si <i>t</i> Bu <sub>3</sub> ) <sub>2</sub> | 2.16 | σ: 1.92               | σ: 0.4042 Tl (sp <sup>1.23</sup> ) + 0.9147 N (sp <sup>1.49</sup> )                 | 16.34% (Tl)<br>83.66% (N) | 2.14/0.58/1.56           | Tl-N : 23.78%<br>Tl=N : 68.39%<br>Tl≡N : 7.83% |
|                                                      |      | π <sub>⊥</sub> : 1.88 | π <sub>⊥</sub> : 0.3571 Tl (sp <sup>4.91</sup> ) + 0.9341 N (sp <sup>10.62</sup> )  | 12.75% (Tl)<br>87.25% (N) |                          |                                                |
|                                                      |      | π <sub>∥</sub> : 1.91 | π <sub>∥</sub> : 0.2986 Tl (sp <sup>99.99</sup> ) + 0.9544 N (sp <sup>99.99</sup> ) | 8.91% (Tl)<br>91.09% (N)  |                          |                                                |
| L' = Si <i>i</i> PrDis <sub>2</sub>                  | 2.11 | σ: 1.93               | σ: 0.4162 Tl (sp <sup>1.19</sup> ) + 0.9093 N (sp <sup>1.62</sup> )                 | 17.33% (Tl)<br>82.67% (N) | 2.45/0.50/1.96           | Tl-N : 54.83%<br>Tl=N : 45.17%<br>Tl≡N : 0.00% |
|                                                      |      | π <sub>⊥</sub> : 1.89 | π <sub>⊥</sub> : 0.3703 Tl (sp <sup>6.16</sup> ) + 0.9289 N (sp <sup>10.13</sup> )  | 13.71% (Tl)<br>86.29% (N) |                          |                                                |
|                                                      |      | π <sub>∥</sub> : 1.92 | π <sub>∥</sub> : 0.2979 Tl (sp <sup>58.41</sup> ) + 0.9546 N (sp <sup>99.99</sup> ) | 8.87% (Tl)<br>91.13% (N)  |                          |                                                |
| L' = Tbt                                             | 2.21 | σ: 1.75               | σ: 0.5401 Tl (sp <sup>0.97</sup> ) + 0.8416 N (sp <sup>29.07</sup> )                | 29.17% (Tl)<br>70.83% (N) | 2.25/0.55/1.70           | Tl-N : 74.46%<br>Tl=N : 25.54%<br>Tl≡N : 0.00% |
|                                                      |      | π <sub>⊥</sub> : 0.00 | π <sub>⊥</sub> : 0.3853 Tl (sp <sup>23.17</sup> ) + 0.9344 N (sp <sup>12.53</sup> ) | 0.00% (Tl)<br>0.00% (N)   |                          |                                                |
|                                                      |      | π <sub>∥</sub> : 0.00 | π <sub>∥</sub> : 0.3126 Tl (sp <sup>66.71</sup> ) + 0.9648 N (sp <sup>99.99</sup> ) | 0.00% (Tl)<br>0.00% (N)   |                          |                                                |
| L' = Ar*                                             | 2.13 | σ: 1.75               | σ: 0.5577 Tl (sp <sup>0.97</sup> ) + 0.8301 N (sp <sup>43.29</sup> )                | 31.10% (Tl)<br>68.90% (N) | 2.07/0.67/1.40           | Tl-N : 58.00%<br>Tl=N : 42.00%<br>Tl≡N : 1.89% |
|                                                      |      | π <sub>⊥</sub> : 0.00 | π <sub>⊥</sub> : 0.3811 Tl (sp <sup>11.13</sup> ) + 0.9186 N (sp <sup>12.47</sup> ) | 0.00% (Tl)<br>0.00% (N)   |                          |                                                |
|                                                      |      | π <sub>∥</sub> : 0.00 | π <sub>∥</sub> : 0.3068 Tl (sp <sup>63.75</sup> ) + 0.9489 N (sp <sup>99.99</sup> ) | 0.00% (Tl)<br>0.00% (N)   |                          |                                                |



(1) The value of the Wiberg bond index (WBI) for the  $\text{Tl}\equiv\text{N}$  bond and the occupancy of the corresponding  $\sigma$  and  $\pi$  bonding NBO (see references (69,70)). (2) NRT; see references (74-76).

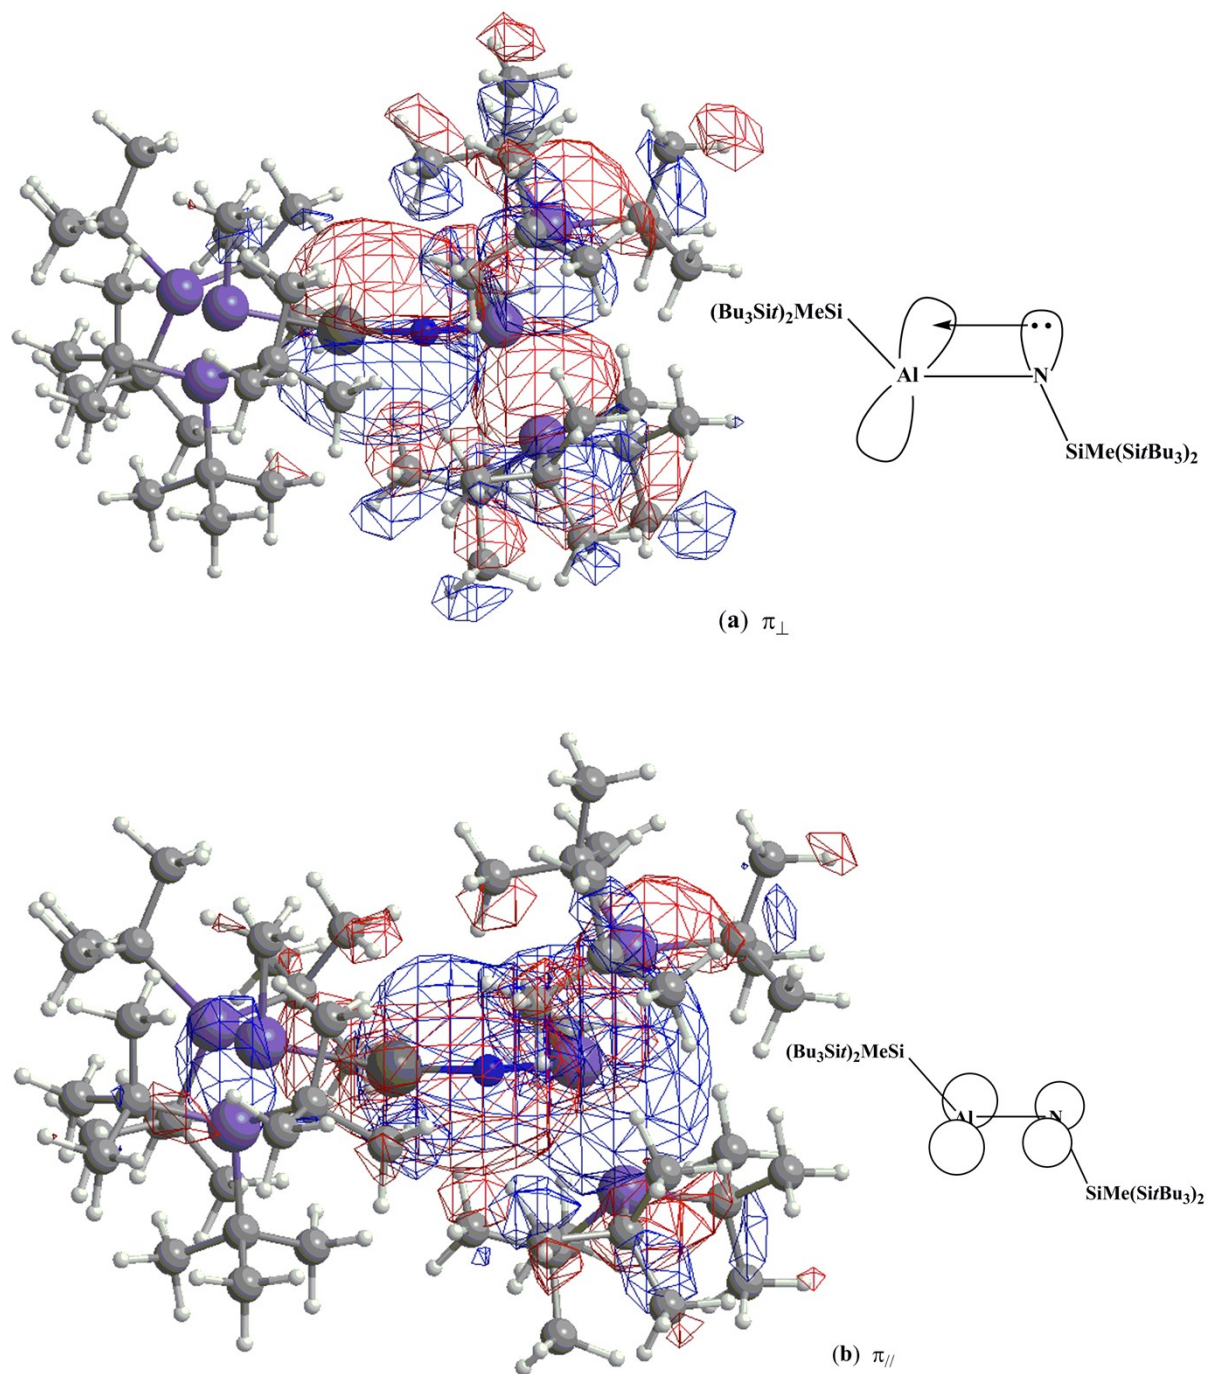

Figure S5: The natural  $\text{Al}\equiv\text{N}$   $\pi$  bonding orbitals ( $\pi_{\perp}$  (a) and  $\pi_{\parallel}$  (b)) for  $(\text{SiMe}(\text{Si}t\text{Bu}_3)_2)\text{-Al}\equiv\text{N}\text{-(SiMe}(\text{Si}t\text{Bu}_3)_2)$ . Also see Figure 1.

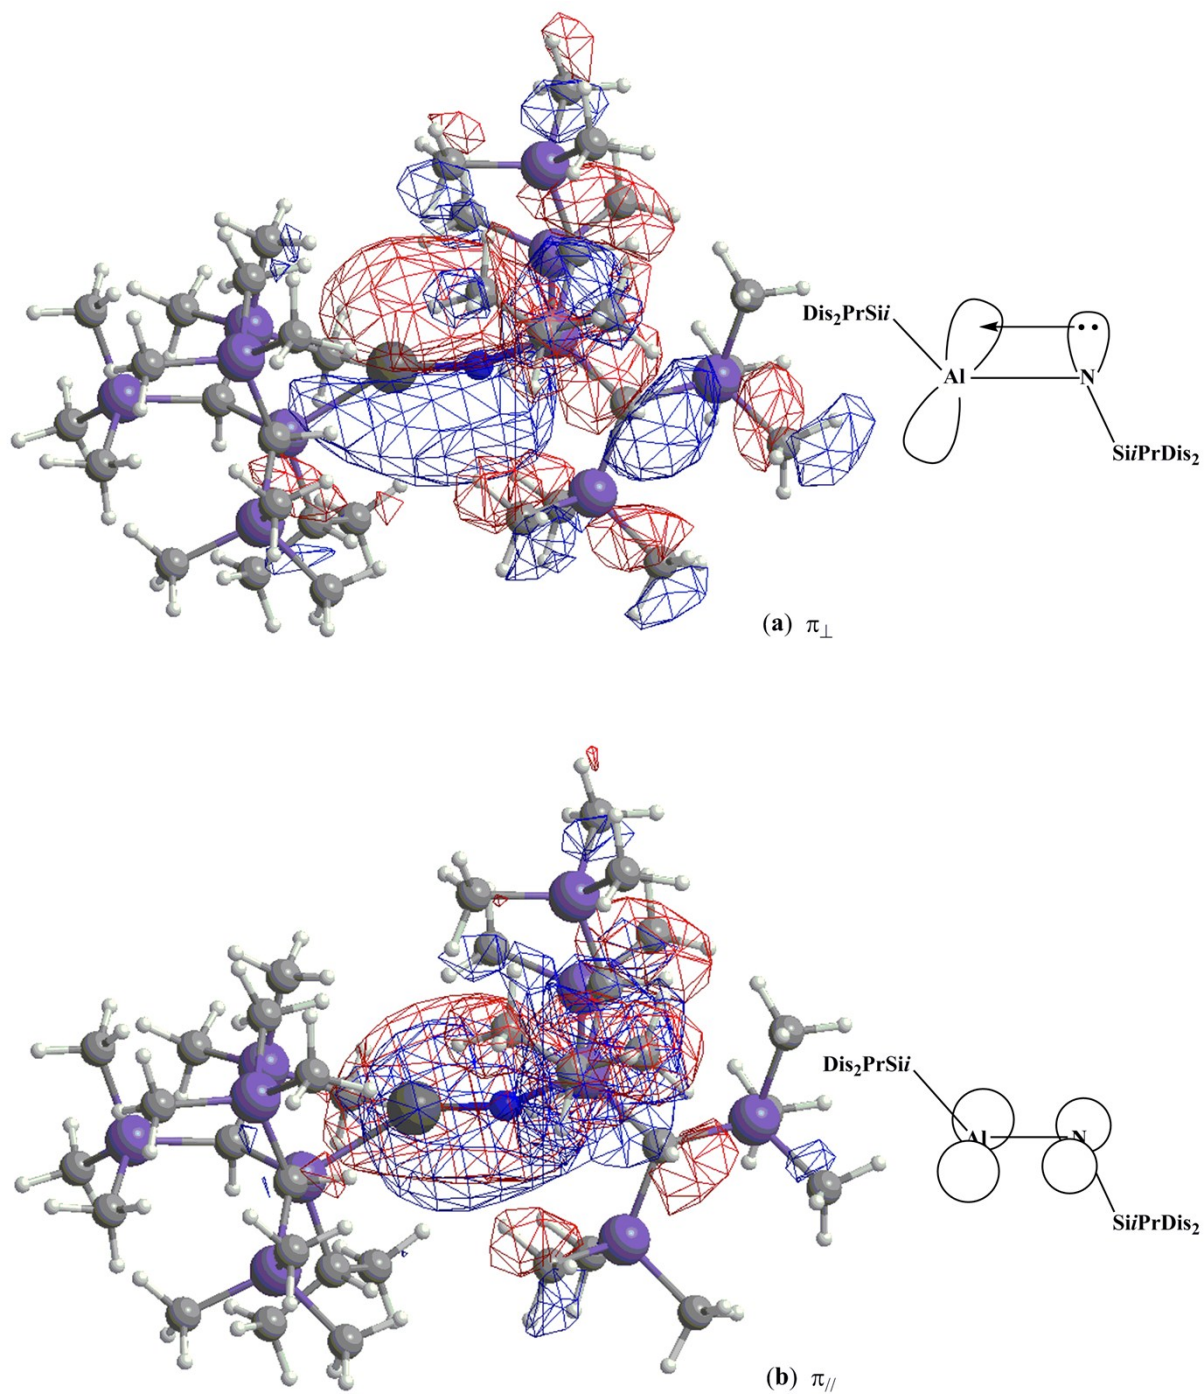

Figure S6: The natural  $\text{Al}\equiv\text{N}$   $\pi$  bonding orbitals ( $\pi_{\perp}$  (a) and  $\pi_{\parallel}$  (b)) for  $(\text{SiPrDis}_2)_2\text{-Al}\equiv\text{N-(SiPrDis}_2)$ . Also see Figure 1.

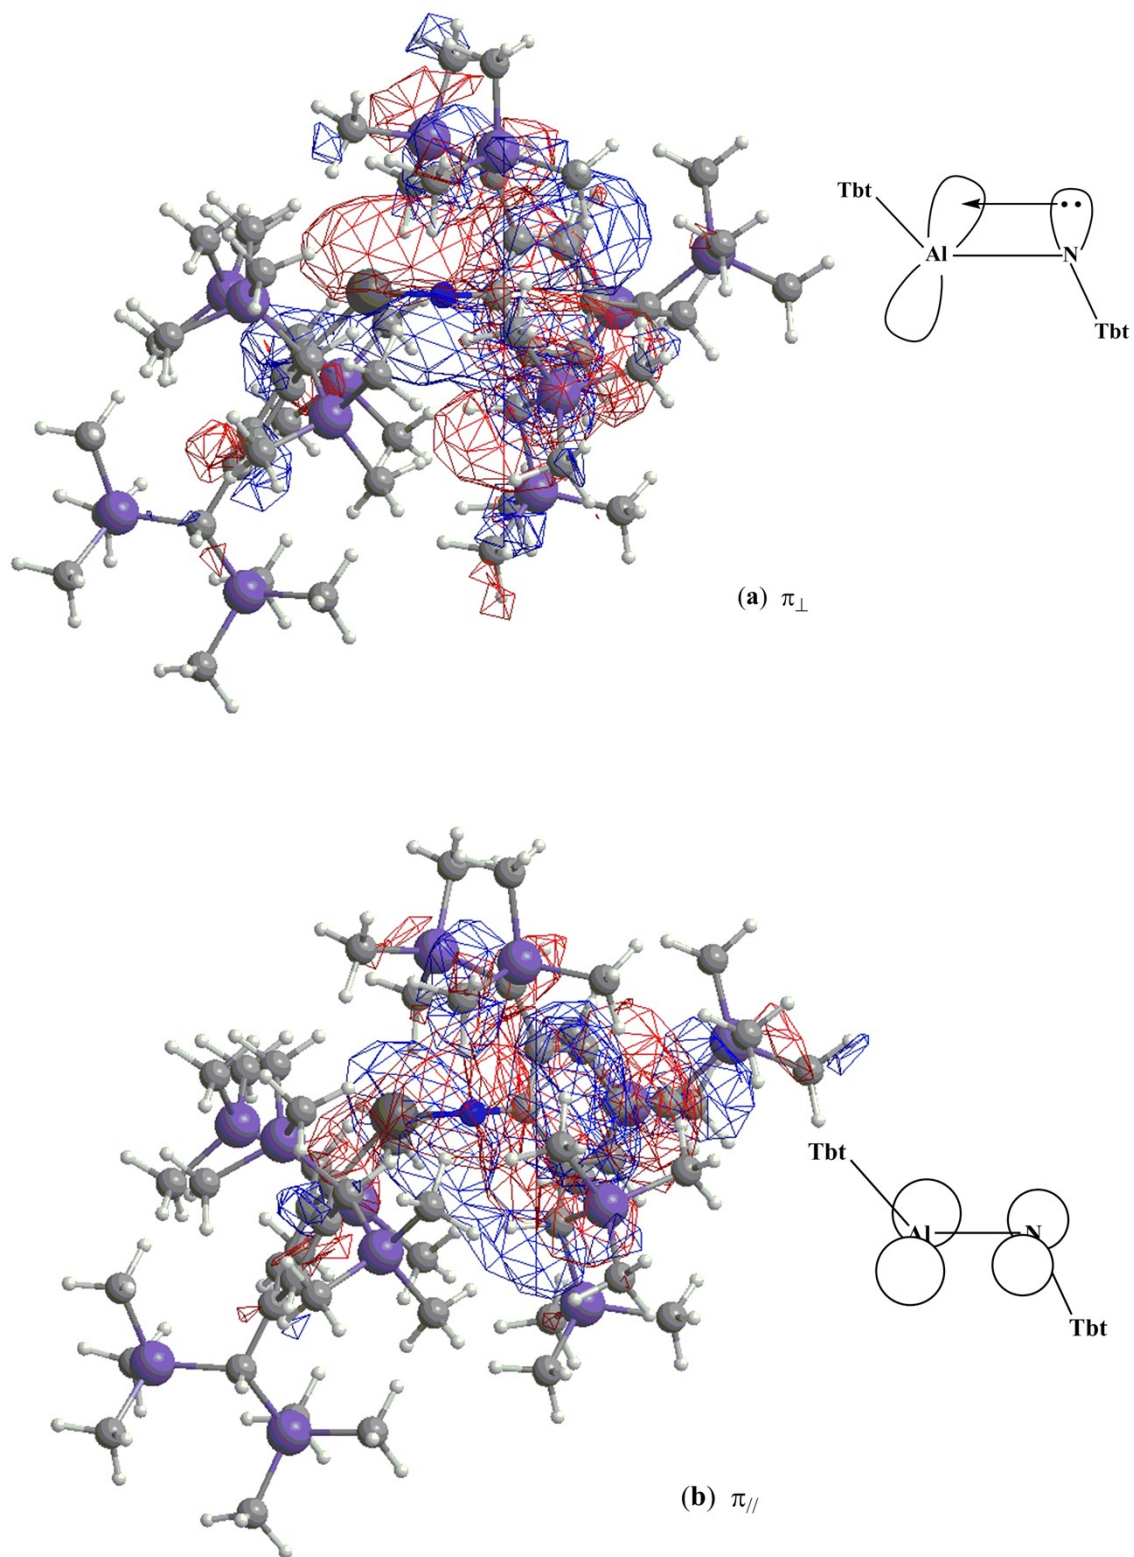

Figure S7: The natural Al≡N  $\pi$  bonding orbitals ( $\pi_{\perp}$  (a) and  $\pi_{\parallel}$  (b)) for (Tbt)-Al≡N-(Tbt). Also see Figure 1.

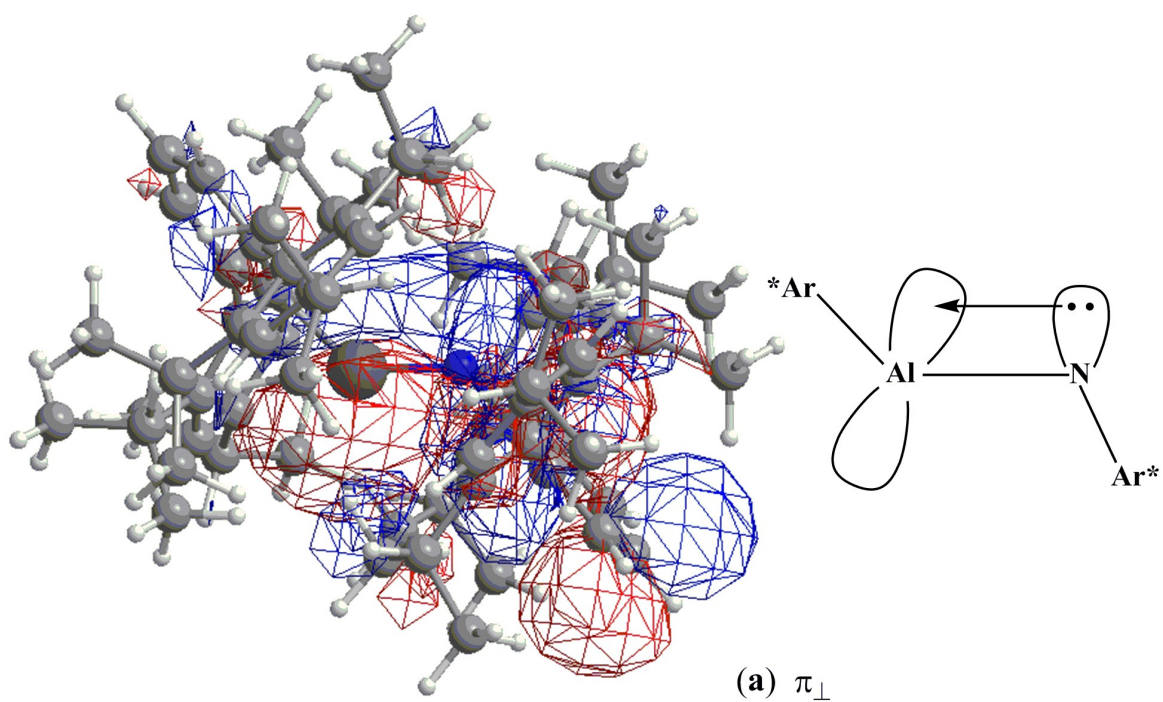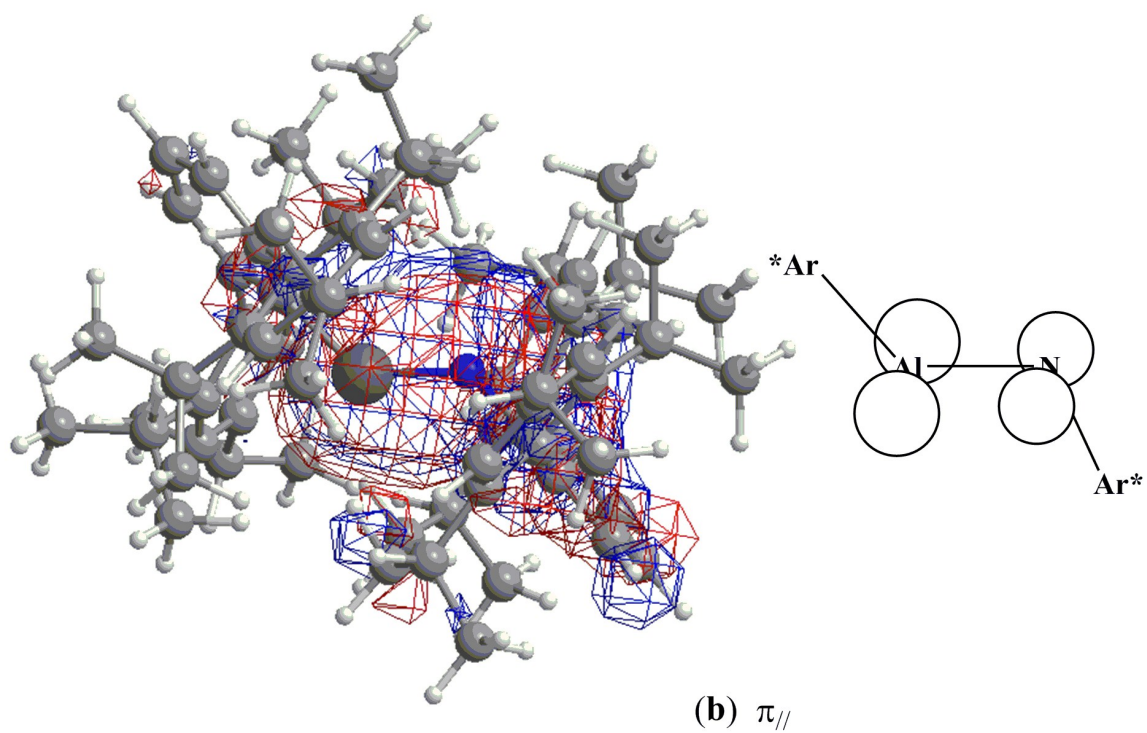

Figure S8: The natural  $\text{Al}\equiv\text{N}$   $\pi$  bonding orbitals ( $\pi_{\perp}$  (a) and  $\pi_{\parallel}$  (b)) for  $(\text{Ar}^*)\text{-Al}\equiv\text{N-(Ar}^*)$ . Also see Figure 1.

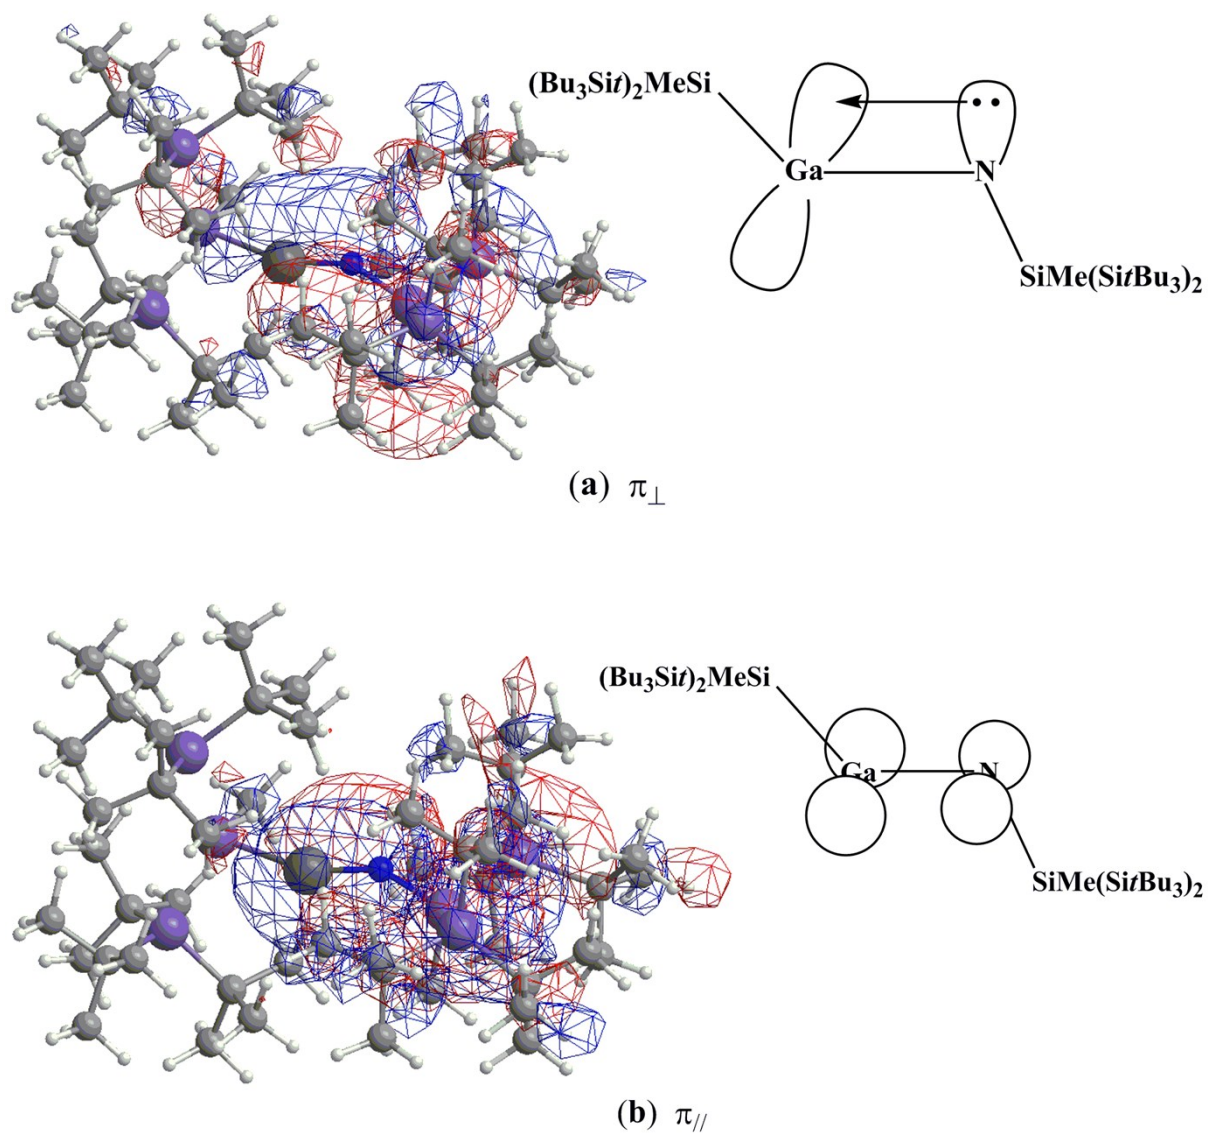

Figure S9: The natural  $\text{Ga}\equiv\text{N}$   $\pi$  bonding orbitals ( $\pi_{\perp}$  (a) and  $\pi_{\parallel}$  (b)) for  $(\text{SiMe}(\text{Si}t\text{Bu}_3)_2)\text{-Ga}\equiv\text{N}\text{-(SiMe}(\text{Si}t\text{Bu}_3)_2)$ . Also see Figure 1.

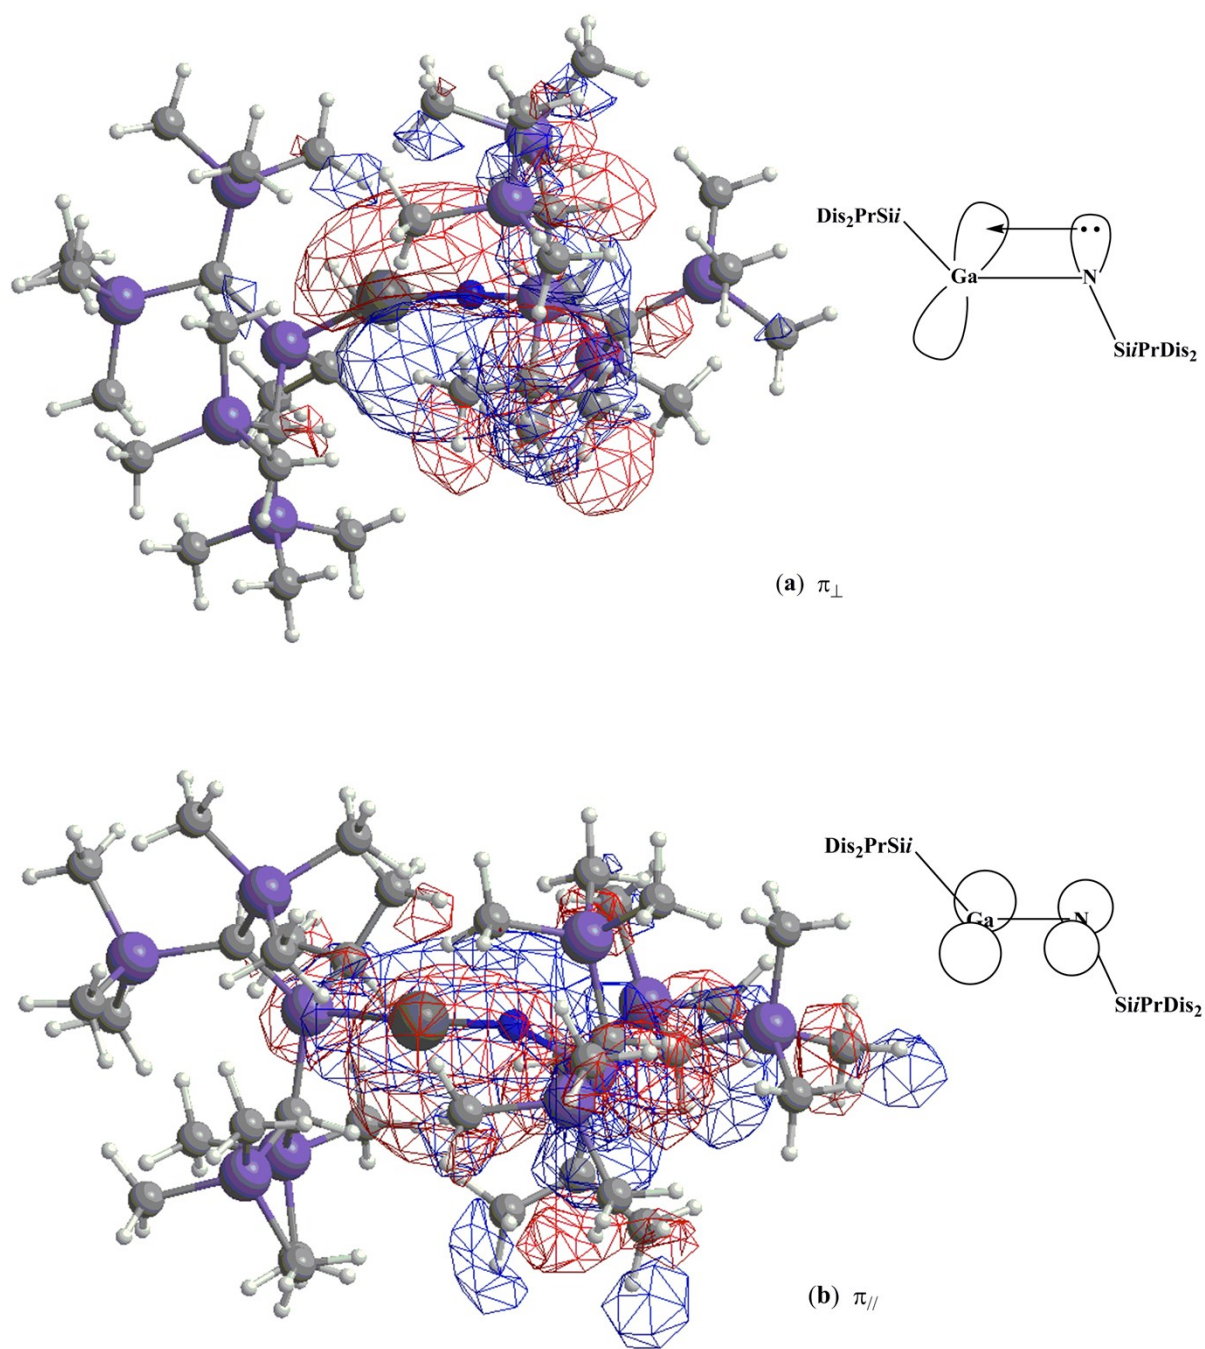

Figure S10: The natural  $\text{Ga}\equiv\text{N}$   $\pi$  bonding orbitals ( $\pi_{\perp}$  (a) and  $\pi_{\parallel}$  (b)) for  $(\text{SiPrDis}_2)_2\text{-Ga}\equiv\text{N-(SiPrDis}_2)$ . Also see Figure 1.

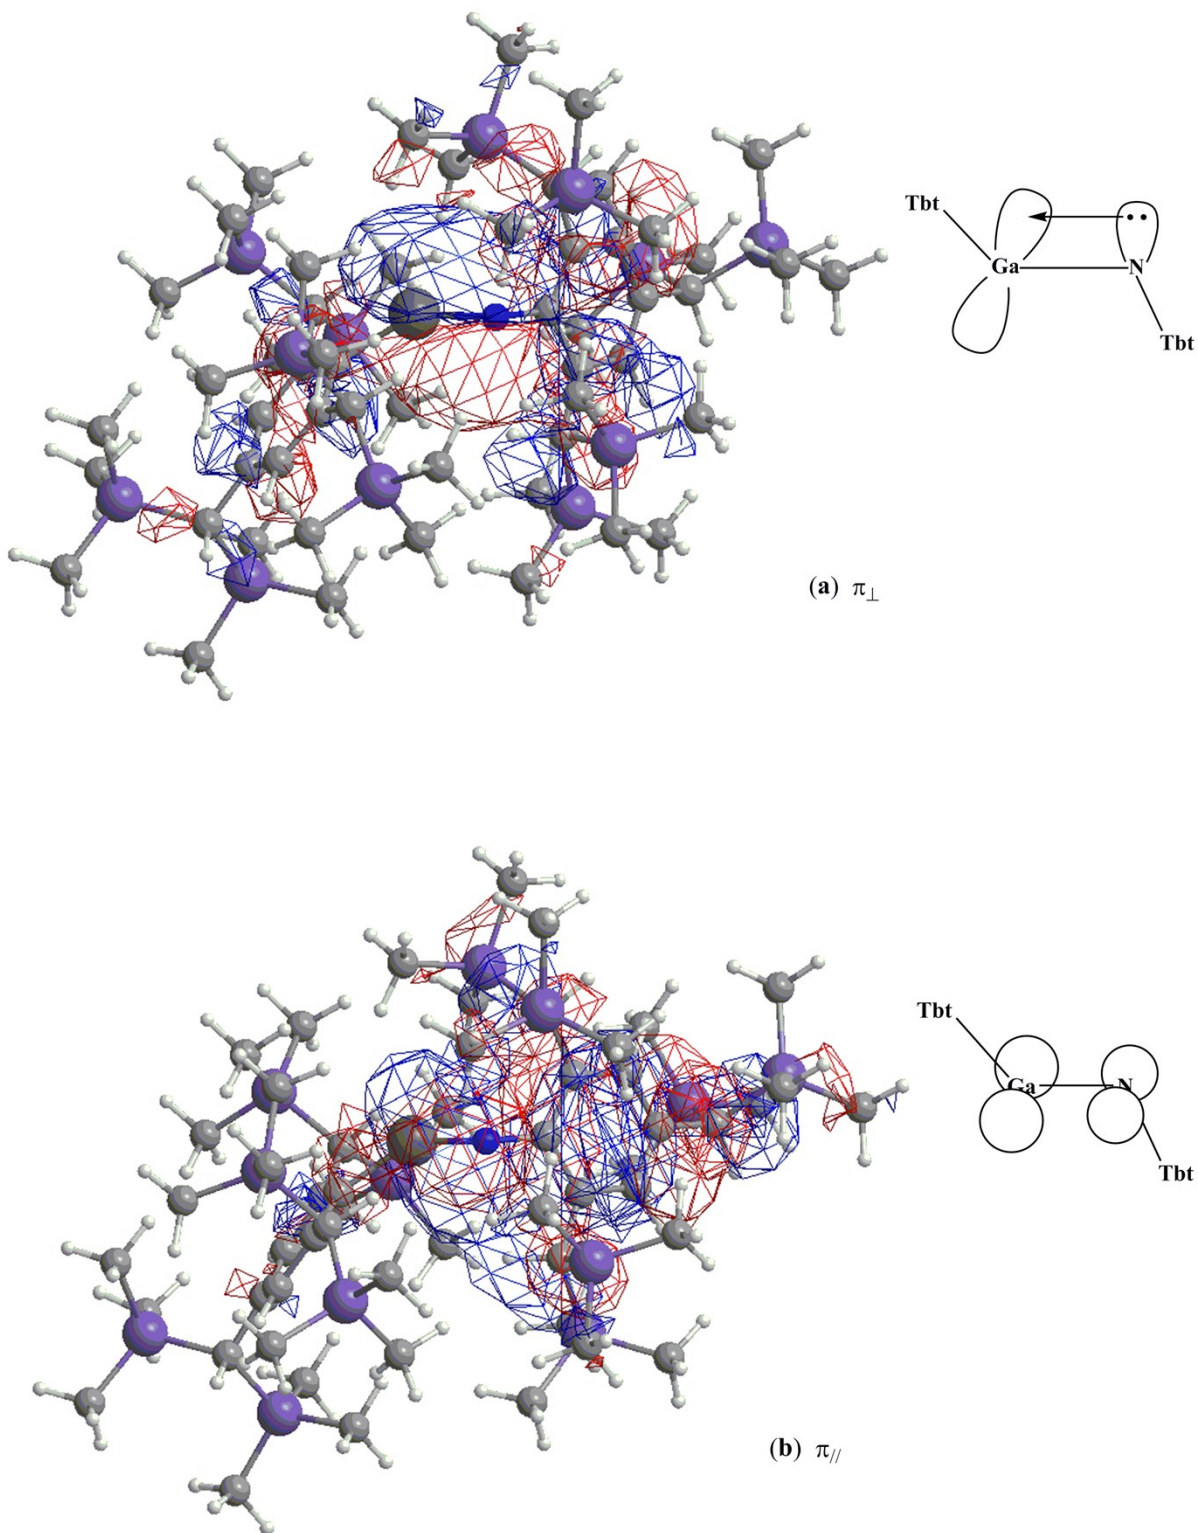

Figure S11: The natural Ga≡N  $\pi$  bonding orbitals ( $\pi_{\perp}$  (a) and  $\pi_{\parallel}$  (b)) for (Tbt)<sub>2</sub>Ga≡N-(Tbt). Also see Figure 1.



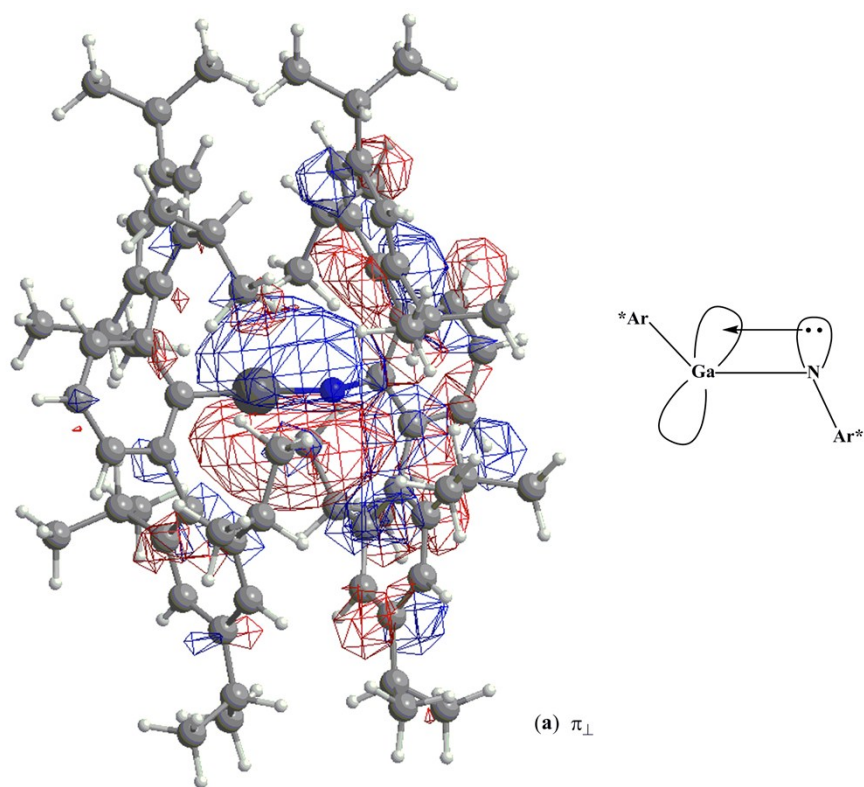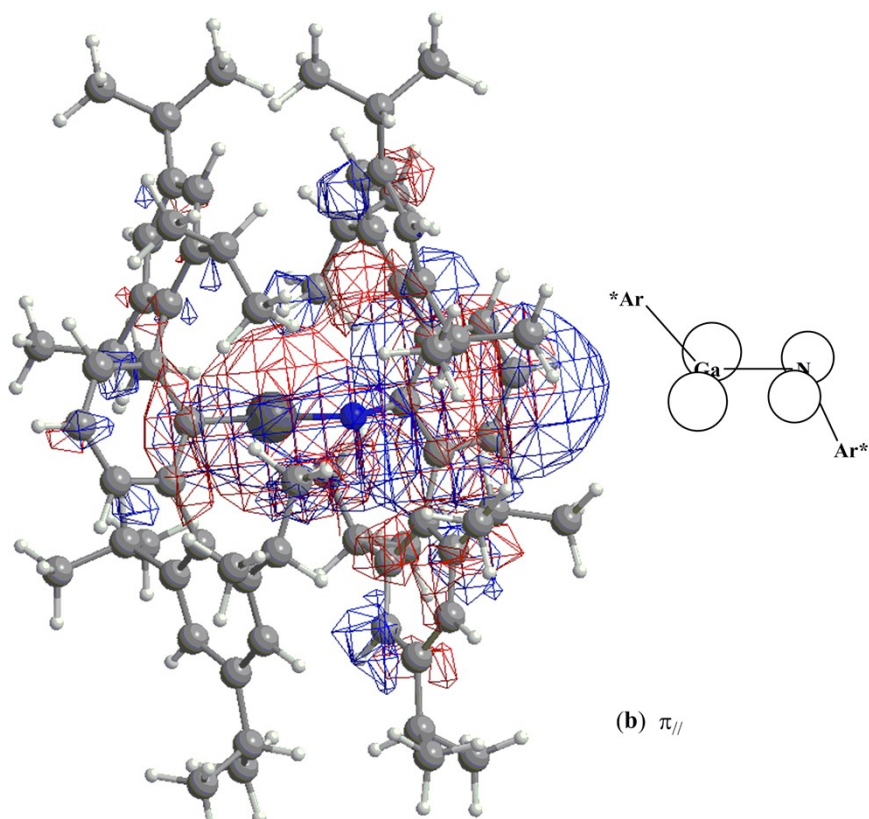

Figure S12: The natural Ga≡N  $\pi$  bonding orbitals ( $\pi_{\perp}$  (a) and  $\pi_{\parallel}$  (b)) for (Ar\*)-Ga≡N-(Ar\*). Also see Figure 1.

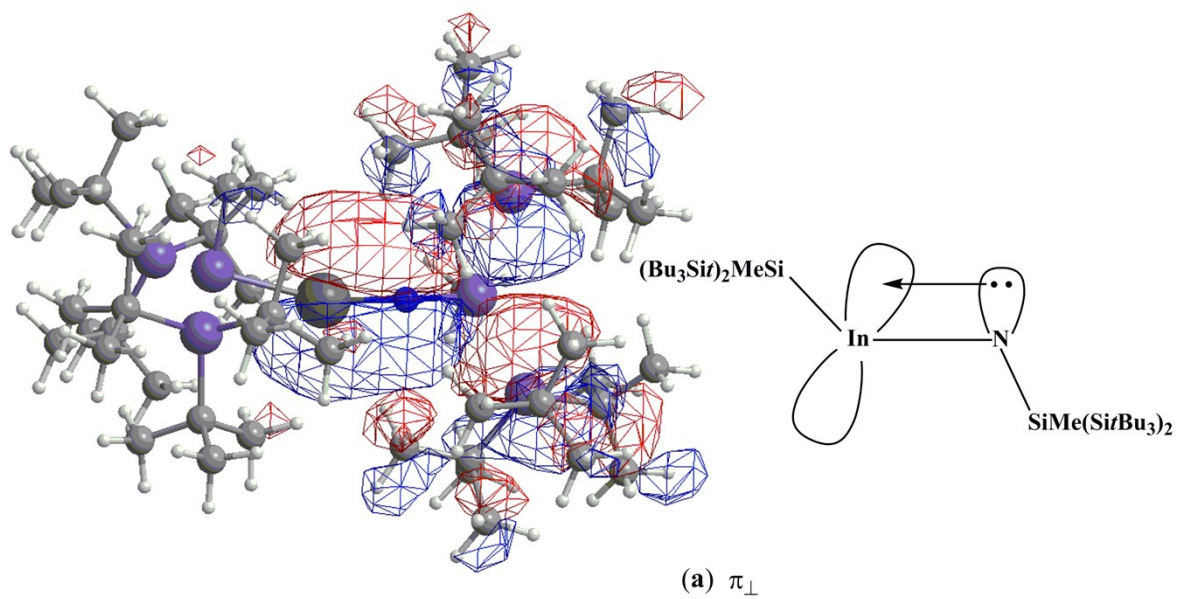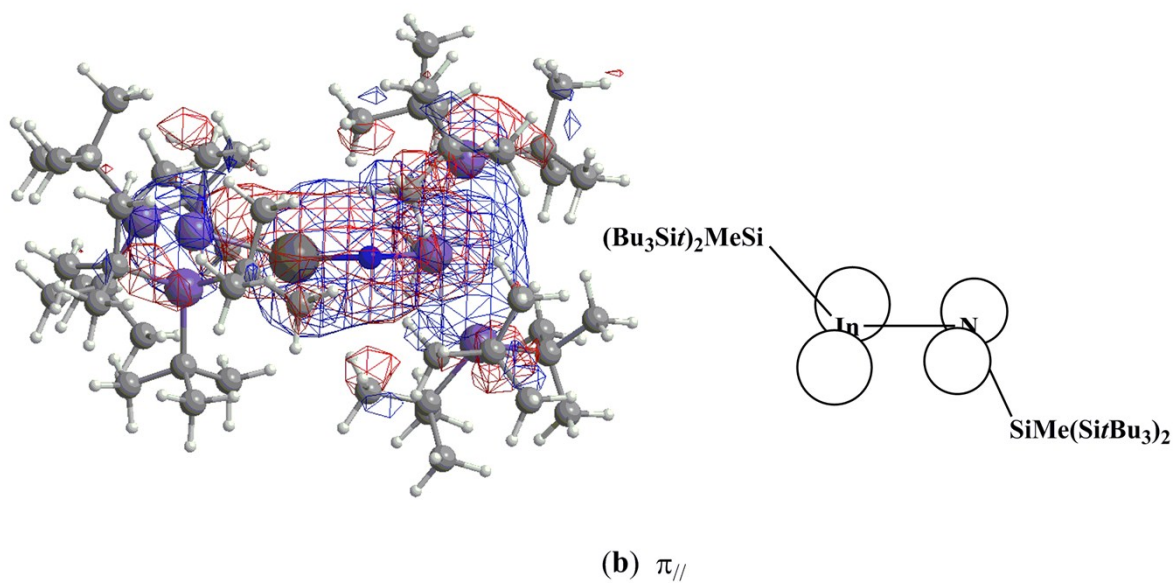

Figure S13: The natural In≡N  $\pi$  bonding orbitals ( $\pi_{\perp}$  (a) and  $\pi_{//}$  (b)) for (SiMe(SitBu<sub>3</sub>)<sub>2</sub>)-In≡N-(SiMe(SitBu<sub>3</sub>)<sub>2</sub>). Also see Figure 1.

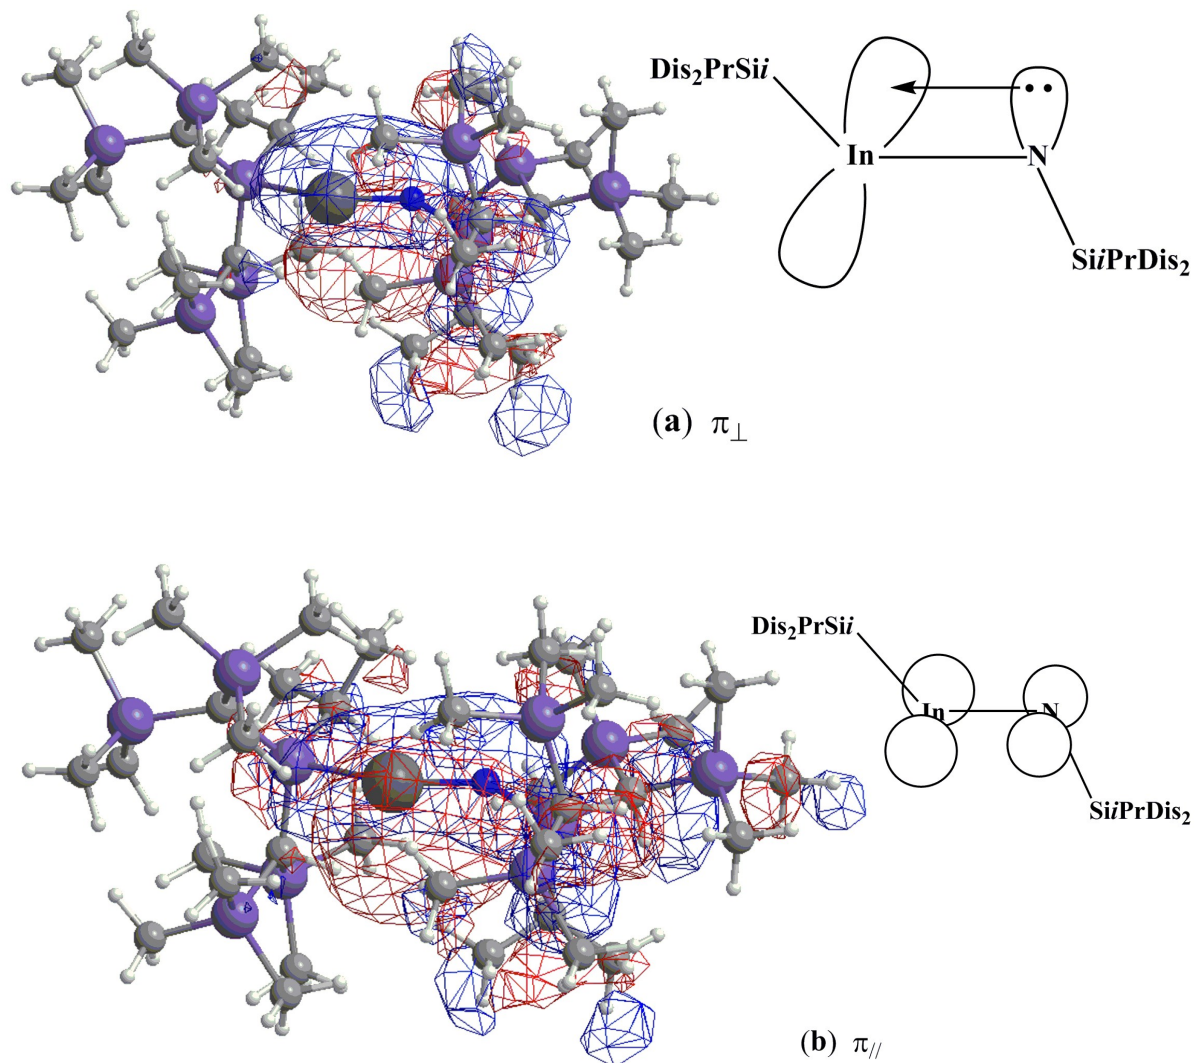

Figure S14: The natural  $\text{In}\equiv\text{N}$   $\pi$  bonding orbitals ( $\pi_{\perp}$  (a) and  $\pi_{\parallel}$  (b)) for  $(\text{SiPrDis}_2)\text{-In}\equiv\text{N}\text{-(SiPrDis}_2)$ . Also see Figure 1.

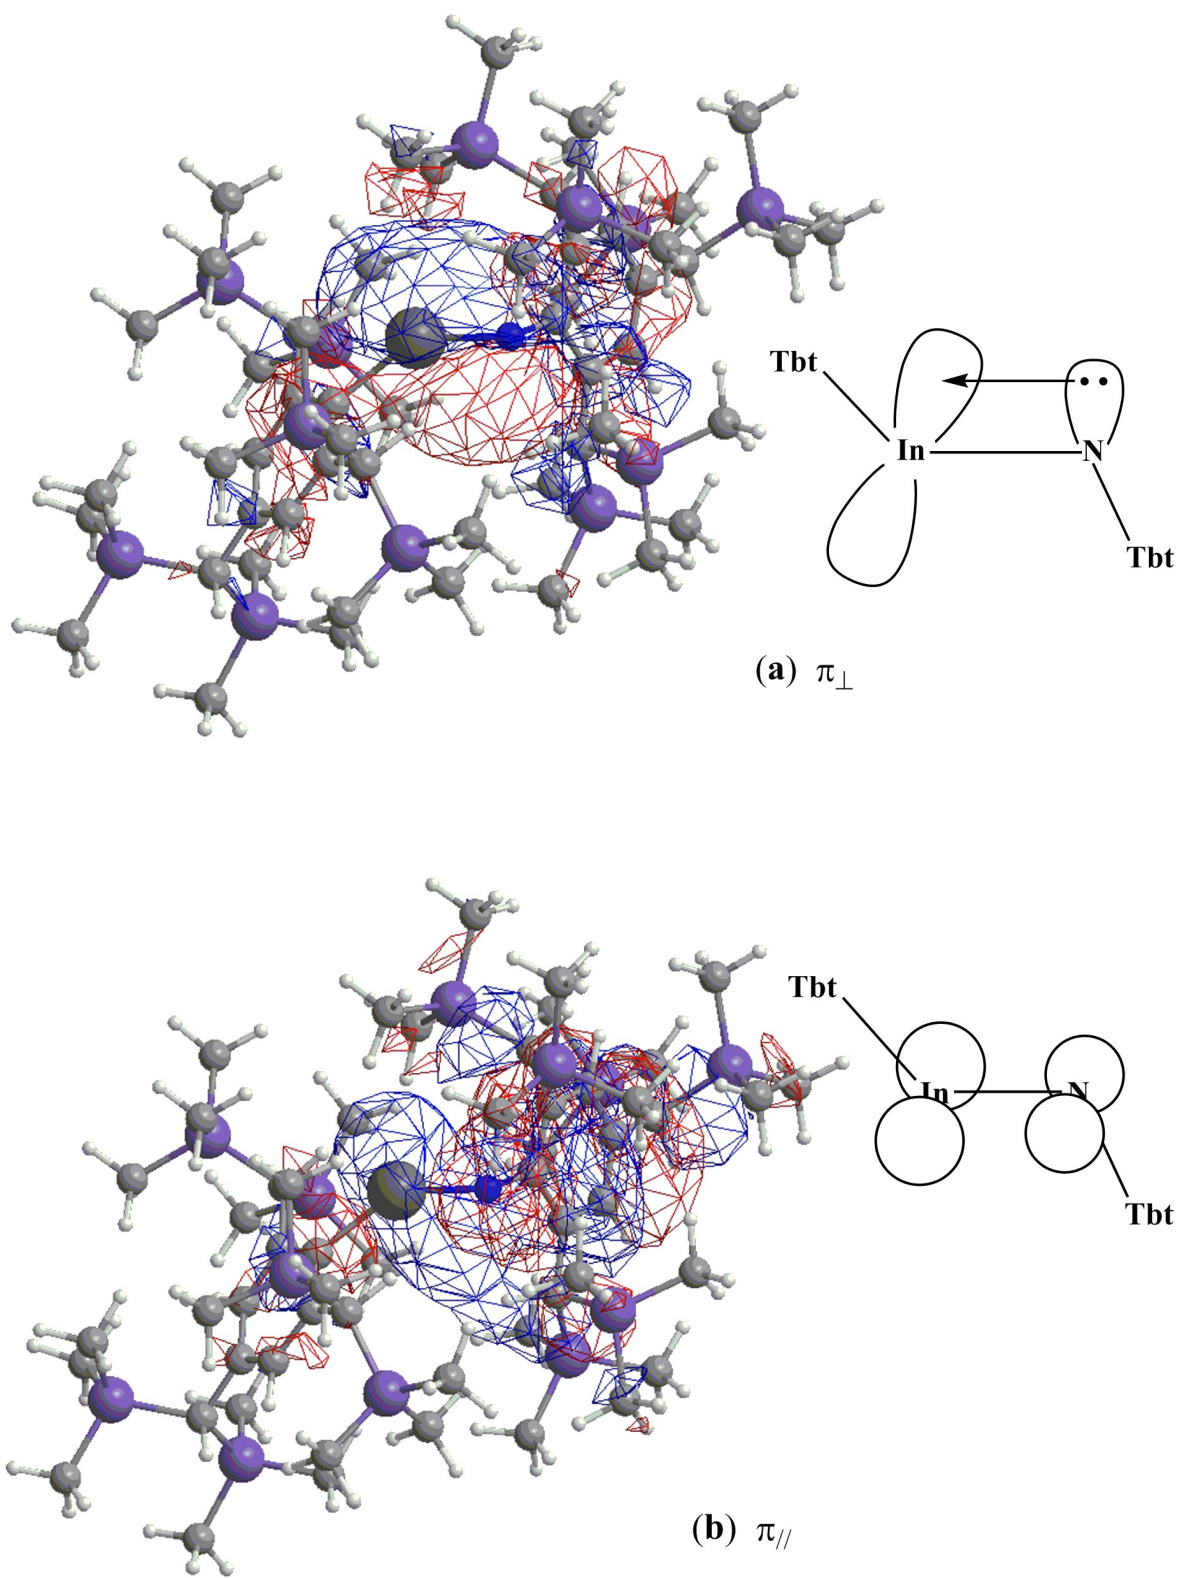

Figure S15: The natural In≡N  $\pi$  bonding orbitals ( $\pi_{\perp}$  (a) and  $\pi_{\parallel}$  (b)) for (Tbt)In≡N-(Tbt). Also see Figure 1.

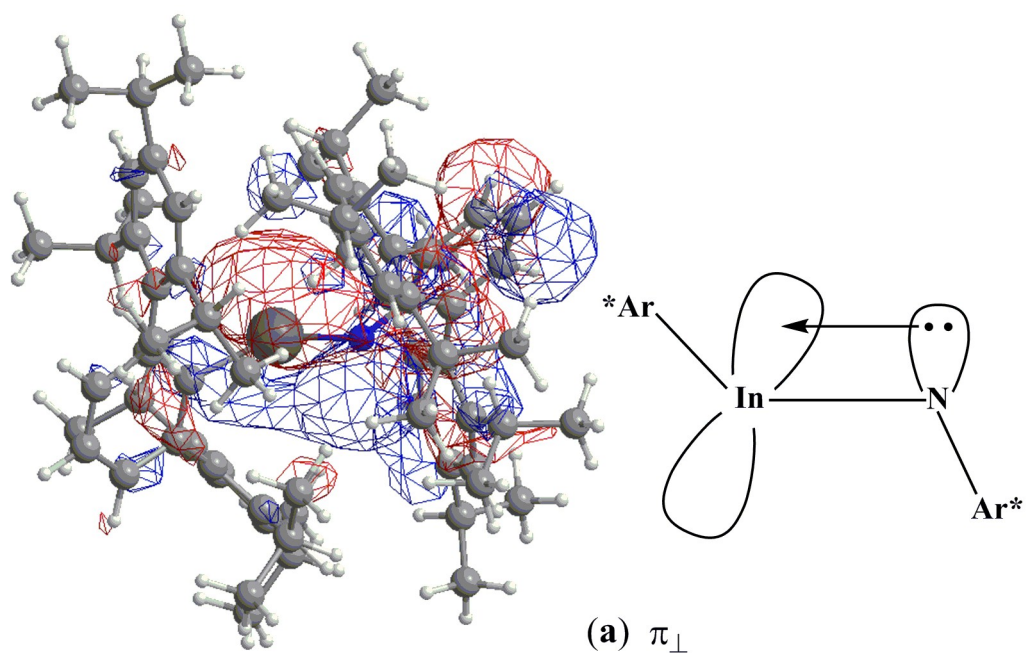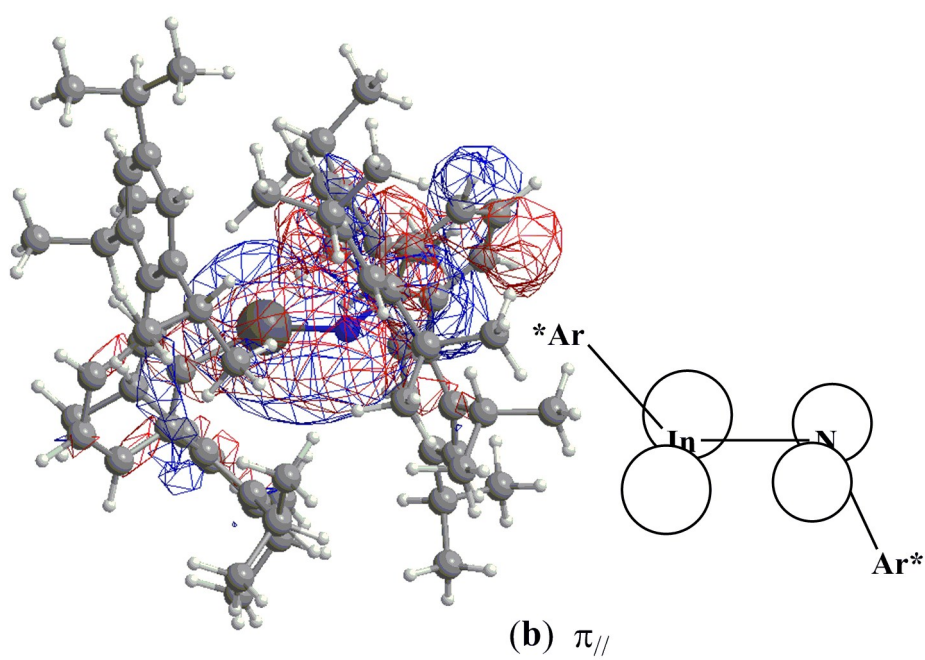

Figure S16: The natural  $\text{In}\equiv\text{N}$   $\pi$  bonding orbitals ( $\pi_{\perp}$  (a) and  $\pi_{\parallel}$  (b)) for  $(\text{Ar}^*)\text{-In}\equiv\text{N-(Ar}^*)$ . Also see Figure 1.

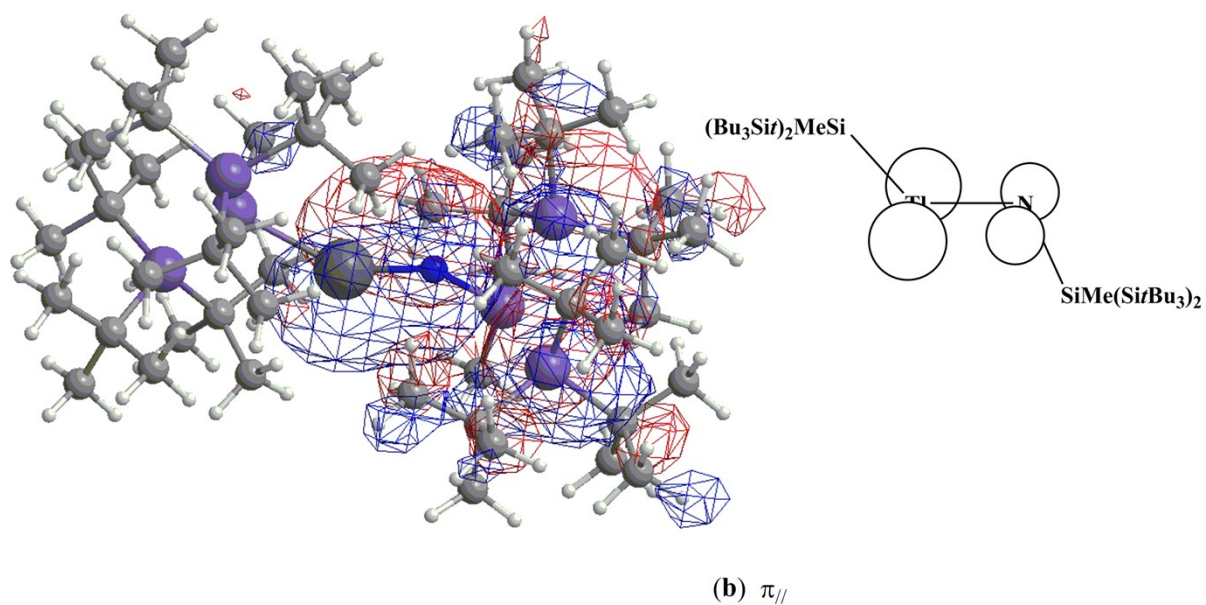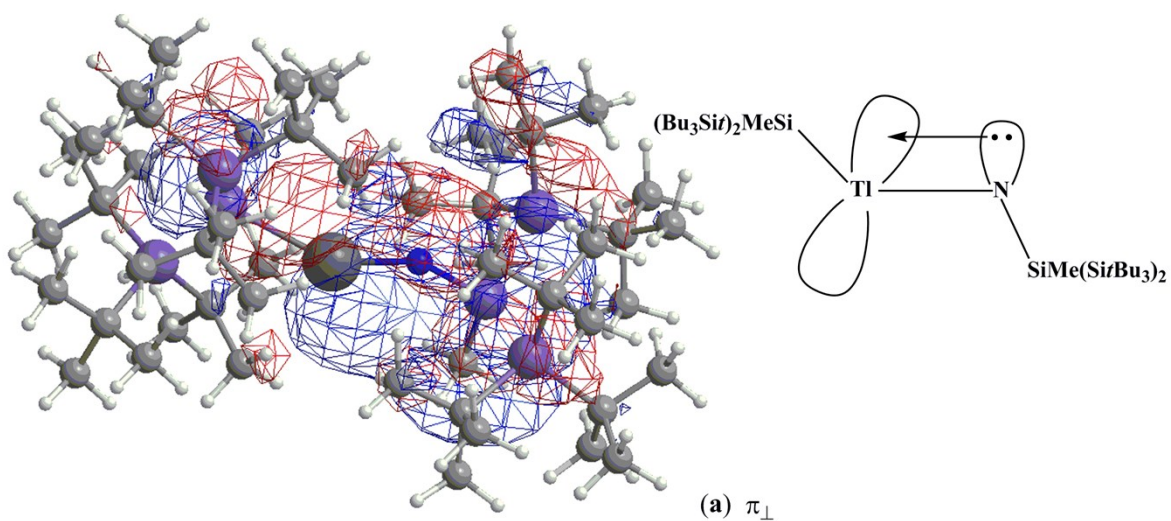

Figure S17: The natural  $\text{Tl}\equiv\text{N}$   $\pi$  bonding orbitals ( $\pi_{\perp}$  (a) and  $\pi_{\parallel}$  (b)) for  $(\text{SiMe}(\text{Si}t\text{Bu}_3)_2)\text{-Tl}\equiv\text{N}\text{-(SiMe}(\text{Si}t\text{Bu}_3)_2)$ . Also see Figure 1.

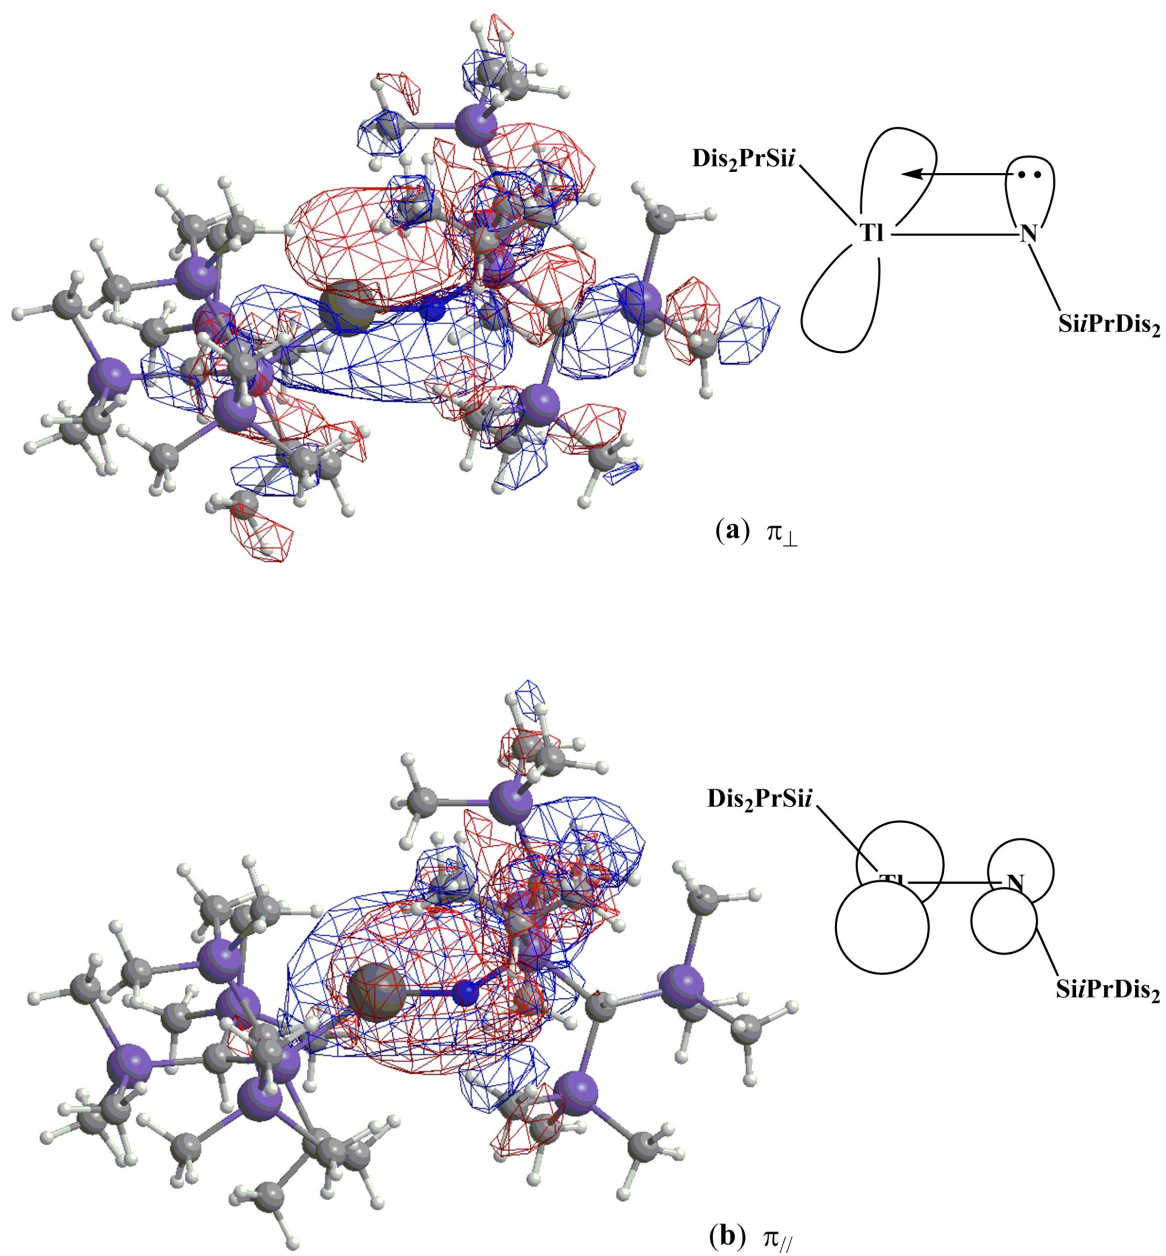

Figure S18: The natural Tl≡N  $\pi$  bonding orbitals ( $\pi_{\perp}$  (a) and  $\pi_{\parallel}$  (b)) for  $(\text{Si}i\text{PrDis}_2)\text{-Tl}\equiv\text{N-(Si}i\text{PrDis}_2)$ . Also see Figure 1.

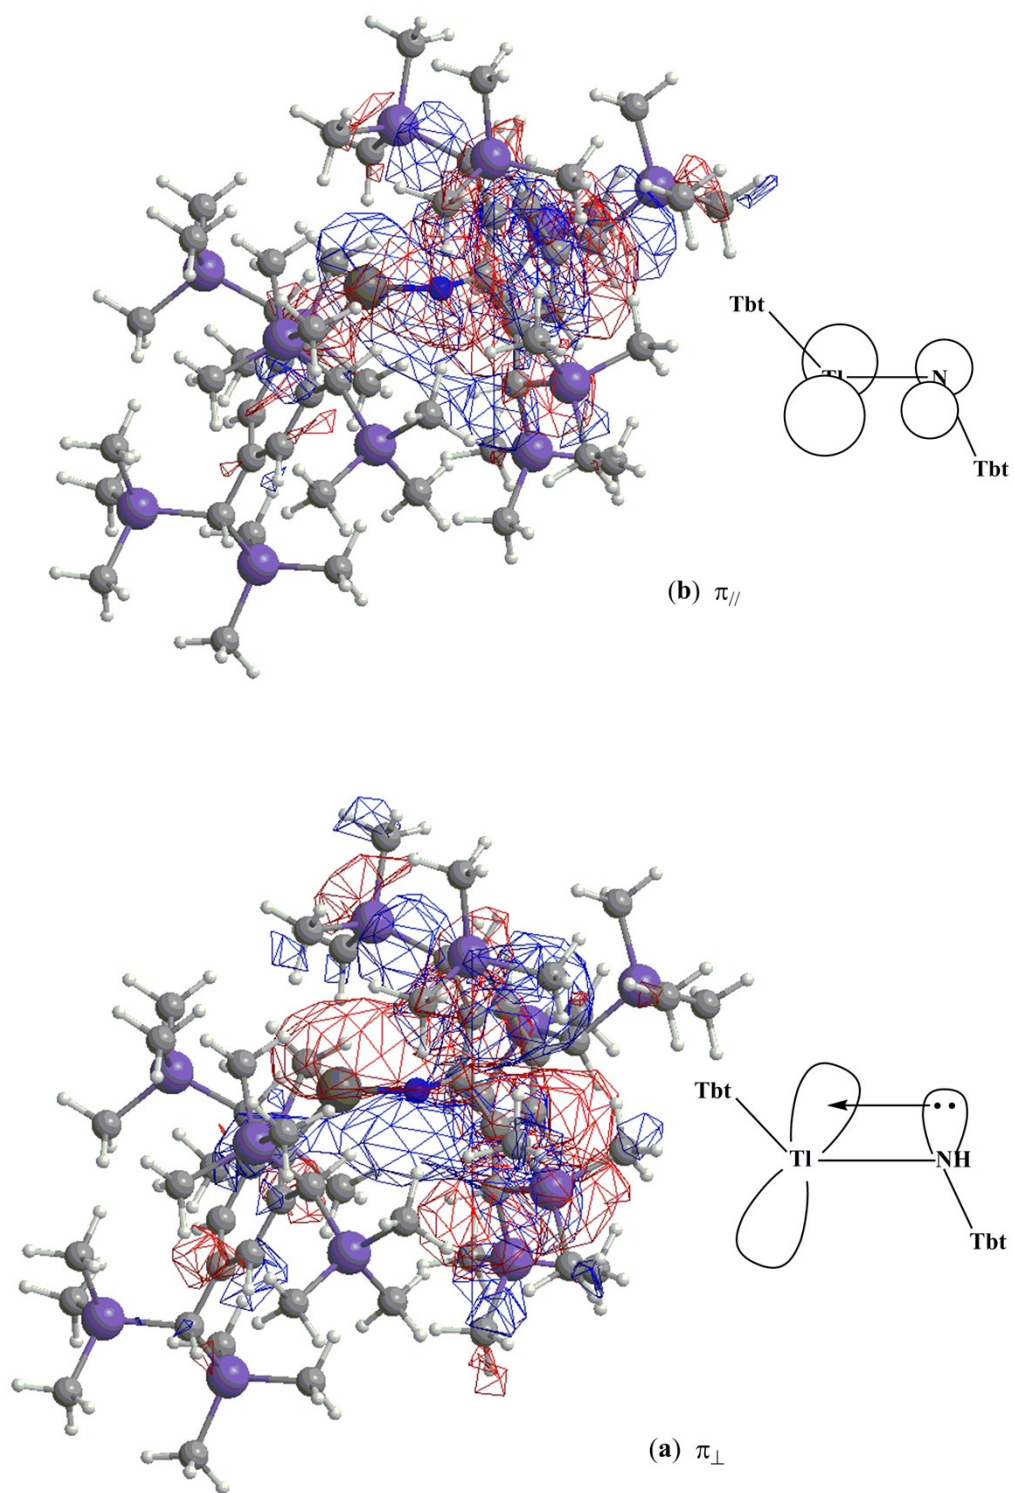

Figure S19: The natural  $\text{Tl}\equiv\text{N}$   $\pi$  bonding orbitals ( $\pi_{\perp}$  (a) and  $\pi_{\parallel}$  (b)) for  $(\text{Tbt})_3\text{Tl}\equiv\text{N}(\text{Tbt})$ . Also see Figure 1.



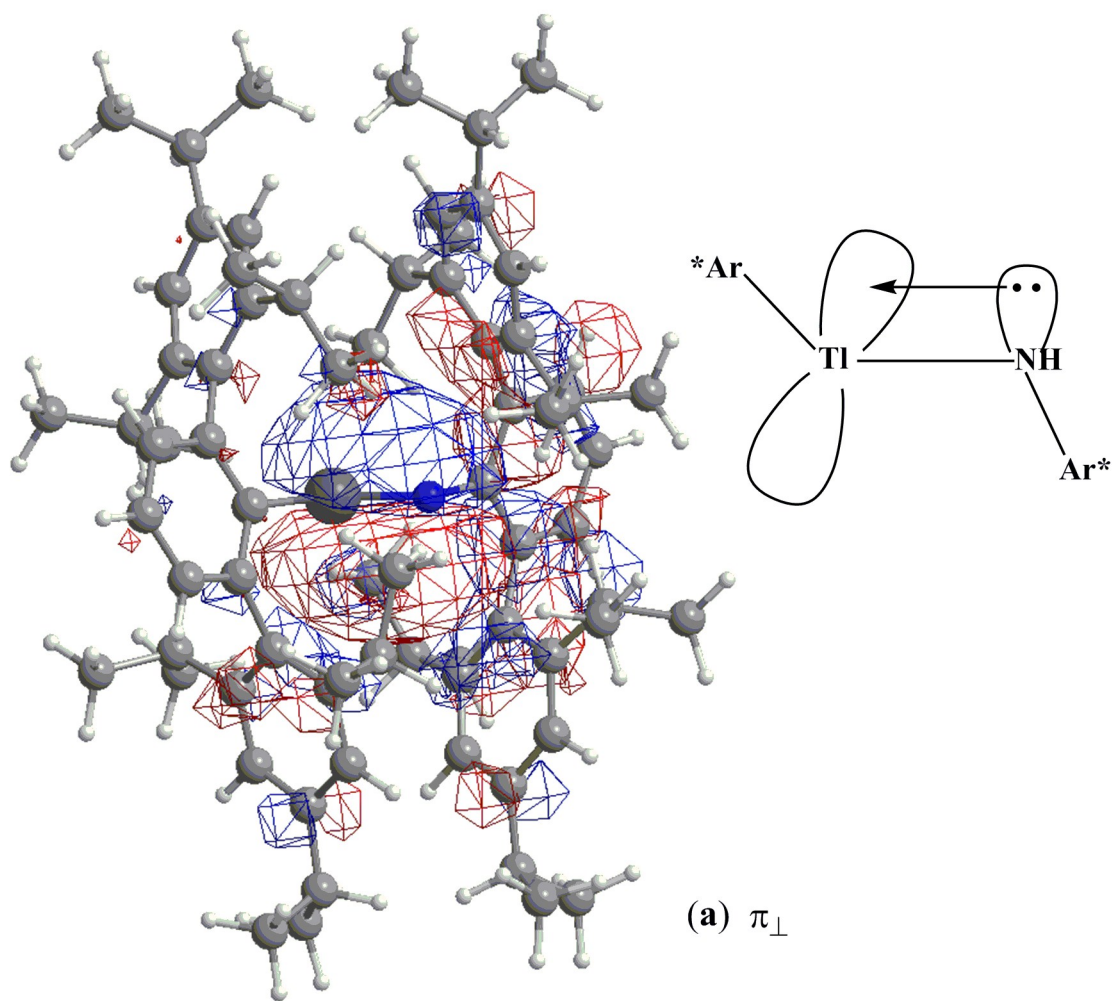

Figure S20: The natural  $\text{Tl}\equiv\text{N}$   $\pi$  bonding orbitals ( $\pi_{\perp}$  (a) and  $\pi_{\parallel}$  (b)) for  $(\text{Ar}^*)\text{-Tl}\equiv\text{N}(\text{Ar}^*)$ . Also see Figure 1.

b97d3/LANL2DZ+dp

-----  
--  
SiMe(SitBu3)2-B≡N-SiMe(SitBu3)2  
-----  
--

| Atomic<br>Number | Coordinates (Angstroms) |           |           |
|------------------|-------------------------|-----------|-----------|
|                  | X                       | Y         | Z         |
| B                | 0.547523                | 0.089793  | 0.214826  |
| N                | -0.725921               | -0.006705 | 0.106926  |
| Si               | -2.399809               | -0.493246 | 0.328477  |
| Si               | -3.227341               | -1.358653 | -1.862109 |
| Si               | -3.439304               | 1.247194  | 1.859974  |
| C                | -2.263330               | -2.095611 | 1.355496  |
| H                | -1.937631               | -2.927058 | 0.717740  |
| H                | -3.209960               | -2.389331 | 1.826630  |
| H                | -1.505715               | -1.977284 | 2.138917  |
| C                | -4.881080               | -2.417130 | -1.685083 |
| C                | -5.178786               | -3.237670 | -2.964260 |
| H                | -5.244444               | -2.610141 | -3.863623 |
| H                | -6.155730               | -3.742617 | -2.842566 |
| H                | -4.431389               | -4.019829 | -3.148176 |
| C                | -6.113054               | -1.521146 | -1.439704 |
| H                | -5.982406               | -0.867928 | -0.571008 |
| H                | -6.996060               | -2.157667 | -1.243151 |
| H                | -6.352939               | -0.893370 | -2.309321 |
| C                | -4.815644               | -3.412629 | -0.501634 |
| H                | -5.728664               | -4.037254 | -0.503928 |
| H                | -4.780194               | -2.897923 | 0.466032  |
| H                | -3.953161               | -4.087651 | -0.549049 |
| C                | -3.514602               | 0.195234  | -3.019858 |
| C                | -4.352122               | 1.242958  | -2.258025 |

|   |           |           |           |
|---|-----------|-----------|-----------|
| H | -3.964132 | 1.414039  | -1.247731 |
| H | -5.405548 | 0.949909  | -2.164514 |
| H | -4.323691 | 2.210300  | -2.792231 |
| C | -4.245406 | -0.081415 | -4.353315 |
| H | -4.335624 | 0.865221  | -4.919501 |
| H | -5.266378 | -0.457752 | -4.191974 |
| H | -3.717578 | -0.797620 | -4.996538 |
| C | -2.149335 | 0.849828  | -3.335259 |
| H | -1.541095 | 0.232354  | -4.010372 |
| H | -1.561878 | 1.034425  | -2.425191 |
| H | -2.309301 | 1.824610  | -3.832390 |
| C | -1.840773 | -2.541581 | -2.640836 |
| C | -2.025502 | -2.695741 | -4.173487 |
| H | -1.280467 | -3.423994 | -4.545957 |
| H | -1.838564 | -1.750926 | -4.702793 |
| H | -3.017766 | -3.061194 | -4.466990 |
| C | -0.422541 | -1.978284 | -2.436083 |
| H | 0.302317  | -2.606994 | -2.985244 |
| H | -0.133303 | -1.973652 | -1.381745 |
| H | -0.320143 | -0.955310 | -2.805047 |
| C | -1.823263 | -3.964342 | -2.030601 |
| H | -1.666296 | -3.950694 | -0.942847 |
| H | -0.978314 | -4.526730 | -2.470516 |
| H | -2.735638 | -4.538271 | -2.239075 |
| C | -2.425515 | 1.101740  | 3.564364  |
| C | -3.208772 | 3.074770  | 1.123507  |
| C | -5.324259 | 0.802189  | 2.197342  |
| C | -5.868228 | 1.497356  | 3.467813  |
| H | -5.719742 | 2.589033  | 3.440478  |
| H | -5.410010 | 1.110210  | 4.388347  |
| H | -6.956753 | 1.313483  | 3.543514  |
| C | -5.481904 | -0.725465 | 2.380795  |
| H | -6.533006 | -0.959537 | 2.634254  |
| H | -4.848641 | -1.136019 | 3.176627  |
| H | -5.248910 | -1.262009 | 1.451857  |

|    |           |           |           |
|----|-----------|-----------|-----------|
| C  | -6.271681 | 1.202582  | 1.038574  |
| H  | -7.218994 | 0.641205  | 1.135766  |
| H  | -5.856360 | 0.981047  | 0.049267  |
| H  | -6.523848 | 2.269344  | 1.062741  |
| C  | -2.053532 | 3.043131  | 0.106093  |
| H  | -2.287700 | 2.445716  | -0.782768 |
| H  | -1.137674 | 2.626640  | 0.538259  |
| H  | -1.833226 | 4.070612  | -0.235194 |
| C  | -4.449795 | 3.669800  | 0.415028  |
| H  | -4.857159 | 3.038920  | -0.381933 |
| H  | -4.156119 | 4.631108  | -0.047019 |
| H  | -5.257225 | 3.887653  | 1.130048  |
| C  | -2.824158 | 4.129820  | 2.188879  |
| H  | -1.847037 | 3.931417  | 2.648486  |
| H  | -3.576731 | 4.222265  | 2.985739  |
| H  | -2.748680 | 5.114370  | 1.690402  |
| C  | -0.916676 | 1.216351  | 3.259724  |
| H  | -0.575760 | 0.430117  | 2.580373  |
| H  | -0.338510 | 1.132028  | 4.198907  |
| H  | -0.655512 | 2.179573  | 2.797607  |
| C  | -2.741766 | 2.163939  | 4.656776  |
| H  | -2.299375 | 1.814374  | 5.608605  |
| H  | -2.294855 | 3.139797  | 4.442877  |
| H  | -3.813919 | 2.312263  | 4.833143  |
| C  | -2.666220 | -0.265066 | 4.253267  |
| H  | -2.545507 | -1.121717 | 3.584424  |
| H  | -3.667959 | -0.320482 | 4.704265  |
| H  | -1.935886 | -0.382572 | 5.075379  |
| Si | 2.518620  | 0.356516  | 0.502243  |
| Si | 3.460923  | -1.854566 | 1.247888  |
| Si | 3.213576  | 1.991604  | -1.264687 |
| C  | 2.564535  | 1.291058  | 2.184844  |
| H  | 2.044864  | 0.699722  | 2.950364  |
| H  | 2.084268  | 2.273380  | 2.144051  |
| H  | 3.599149  | 1.437588  | 2.524334  |

|   |          |           |           |
|---|----------|-----------|-----------|
| C | 1.973401 | -2.842250 | 2.068100  |
| C | 2.444632 | -4.074962 | 2.880370  |
| H | 1.552719 | -4.629546 | 3.228052  |
| H | 3.019515 | -3.800630 | 3.775358  |
| H | 3.051440 | -4.772150 | 2.287081  |
| C | 1.001976 | -3.361836 | 0.987148  |
| H | 0.606507 | -2.548755 | 0.366094  |
| H | 0.139325 | -3.845919 | 1.477081  |
| H | 1.463102 | -4.109673 | 0.329363  |
| C | 1.142536 | -1.953659 | 3.020719  |
| H | 0.330770 | -2.556947 | 3.466474  |
| H | 0.666469 | -1.121866 | 2.488758  |
| H | 1.728809 | -1.536151 | 3.848097  |
| C | 4.168822 | -2.853459 | -0.279356 |
| C | 3.220860 | -2.685927 | -1.486113 |
| H | 2.239723 | -3.146928 | -1.325898 |
| H | 3.667834 | -3.153714 | -2.383072 |
| H | 3.052741 | -1.630274 | -1.720680 |
| C | 4.338489 | -4.371974 | -0.032629 |
| H | 3.377676 | -4.875916 | 0.142514  |
| H | 5.000300 | -4.598650 | 0.814024  |
| H | 4.785920 | -4.832215 | -0.933638 |
| C | 5.547780 | -2.292055 | -0.695185 |
| H | 6.334254 | -2.533744 | 0.033110  |
| H | 5.532453 | -1.202558 | -0.819990 |
| H | 5.850585 | -2.732804 | -1.663100 |
| C | 4.864103 | -1.597185 | 2.621002  |
| C | 5.685930 | -2.898523 | 2.820887  |
| H | 6.412492 | -2.736458 | 3.639178  |
| H | 6.264036 | -3.170127 | 1.927490  |
| H | 5.066295 | -3.760426 | 3.100361  |
| C | 5.875167 | -0.491199 | 2.251703  |
| H | 6.629157 | -0.405725 | 3.056347  |
| H | 5.395756 | 0.491353  | 2.151120  |
| H | 6.415844 | -0.705534 | 1.321962  |

|   |          |           |           |
|---|----------|-----------|-----------|
| C | 4.294843 | -1.219620 | 4.011604  |
| H | 3.673479 | -2.014564 | 4.443476  |
| H | 3.706491 | -0.293508 | 3.999059  |
| H | 5.140798 | -1.059442 | 4.705784  |
| C | 1.890865 | 3.452489  | -1.214363 |
| C | 4.997997 | 2.675384  | -0.831909 |
| C | 3.201753 | 1.186433  | -3.050610 |
| C | 3.227904 | 2.228733  | -4.196710 |
| H | 4.106312 | 2.886831  | -4.148418 |
| H | 2.331530 | 2.861917  | -4.217605 |
| H | 3.269723 | 1.692465  | -5.163294 |
| C | 1.939928 | 0.316426  | -3.242733 |
| H | 2.032767 | -0.281597 | -4.167672 |
| H | 1.029326 | 0.918442  | -3.330354 |
| H | 1.781039 | -0.386472 | -2.417787 |
| C | 4.436347 | 0.279466  | -3.258855 |
| H | 5.362009 | 0.865046  | -3.347886 |
| H | 4.317326 | -0.289814 | -4.199047 |
| H | 4.571704 | -0.447326 | -2.451381 |
| C | 5.974509 | 1.507784  | -0.576898 |
| H | 5.535589 | 0.752198  | 0.079639  |
| H | 6.890612 | 1.882813  | -0.084339 |
| H | 6.282112 | 1.008502  | -1.504120 |
| C | 5.625771 | 3.549163  | -1.946567 |
| H | 5.782882 | 2.983331  | -2.875964 |
| H | 6.620538 | 3.895145  | -1.607328 |
| H | 5.032644 | 4.441111  | -2.185444 |
| C | 4.948915 | 3.524301  | 0.460151  |
| H | 4.541742 | 2.963462  | 1.312377  |
| H | 4.349323 | 4.436700  | 0.336792  |
| H | 5.974261 | 3.838993  | 0.729896  |
| C | 2.428443 | 4.739525  | -1.889379 |
| H | 1.607323 | 5.478761  | -1.946233 |
| H | 2.790111 | 4.571874  | -2.912985 |
| H | 3.239638 | 5.203930  | -1.310560 |

|   |           |          |           |
|---|-----------|----------|-----------|
| C | 0.597593  | 3.042679 | -1.951002 |
| H | 0.749818  | 2.904434 | -3.027814 |
| H | -0.156361 | 3.838646 | -1.831037 |
| H | 0.169843  | 2.119573 | -1.540345 |
| C | 1.468640  | 3.839040 | 0.219343  |
| H | 0.913646  | 3.026592 | 0.703708  |
| H | 2.316639  | 4.112117 | 0.860948  |
| H | 0.789682  | 4.709404 | 0.174730  |

-----  
--

-----  
--

[SiMe(SitBu3)2]2-B=N

-----  
--

| Atomic<br>Number | Coordinates (Angstroms) |           |           |
|------------------|-------------------------|-----------|-----------|
|                  | X                       | Y         | Z         |
| B                | -0.086195               | -0.012903 | 0.350701  |
| N                | 0.089707                | -0.076890 | 1.639728  |
| Si               | -2.327675               | -0.117307 | -0.319566 |
| Si               | 2.266120                | 0.149953  | -0.344191 |
| Si               | -3.611817               | -1.941997 | 1.014467  |
| Si               | -3.259504               | 2.255618  | -0.983229 |
| Si               | 3.225338                | -2.178083 | -1.028529 |
| Si               | 3.656345                | 1.871424  | 1.028581  |
| C                | -2.231240               | -1.052939 | -1.978840 |
| H                | -3.233435               | -1.074861 | -2.433057 |
| H                | -1.922747               | -2.089696 | -1.807743 |
| H                | -1.545681               | -0.612890 | -2.708210 |
| C                | 1.960131                | 1.036572  | -2.005887 |
| H                | 1.147280                | 0.573948  | -2.579342 |
| H                | 2.874884                | 0.970239  | -2.614647 |
| H                | 1.723158                | 2.098955  | -1.877634 |

|   |           |           |           |
|---|-----------|-----------|-----------|
| C | -4.590510 | -1.155636 | 2.517492  |
| C | -4.864732 | -2.941787 | -0.190413 |
| C | -2.296103 | -3.232349 | 1.686083  |
| C | -3.459306 | 3.430415  | 0.578176  |
| C | -4.997517 | 2.109066  | -1.914912 |
| C | -1.937193 | 3.003249  | -2.227472 |
| C | 4.331921  | 1.057380  | 2.682022  |
| C | 2.482169  | 3.381351  | 1.466428  |
| C | 5.181342  | 2.581178  | -0.041063 |
| C | 3.000488  | -3.405543 | 0.511755  |
| C | 5.107436  | -2.061181 | -1.663903 |
| C | 2.144816  | -2.747762 | -2.590617 |
| C | -2.931031 | -4.580250 | 2.114714  |
| H | -3.384702 | -5.126827 | 1.278098  |
| H | -3.691786 | -4.463331 | 2.897969  |
| H | -2.132473 | -5.225707 | 2.525667  |
| C | -1.509130 | -2.703312 | 2.907912  |
| H | -2.147011 | -2.593963 | 3.796342  |
| H | -1.002657 | -1.748729 | 2.709095  |
| H | -0.727296 | -3.442723 | 3.163133  |
| C | -1.261406 | -3.535073 | 0.586789  |
| H | -1.705491 | -3.977064 | -0.313985 |
| H | -0.516647 | -4.249473 | 0.974998  |
| H | -0.725555 | -2.623886 | 0.296152  |
| C | -4.994729 | -2.192189 | 3.596845  |
| H | -5.645043 | -2.984874 | 3.201921  |
| H | -5.561760 | -1.672575 | 4.392248  |
| H | -4.129369 | -2.668219 | 4.075330  |
| C | -3.693585 | -0.092489 | 3.194232  |
| H | -4.252127 | 0.392505  | 4.016785  |
| H | -3.392714 | 0.695372  | 2.491394  |
| H | -2.776658 | -0.520757 | 3.617722  |
| C | -5.892525 | -0.456250 | 2.070226  |
| H | -6.640514 | -1.163738 | 1.685007  |
| H | -5.715719 | 0.297838  | 1.298263  |



|   |           |           |           |
|---|-----------|-----------|-----------|
| H | -6.347982 | 0.059353  | 2.936270  |
| C | -5.876442 | -3.780510 | 0.639287  |
| H | -6.511955 | -4.351250 | -0.064416 |
| H | -6.549335 | -3.149716 | 1.235697  |
| H | -5.401513 | -4.505498 | 1.310738  |
| C | -5.727828 | -2.032448 | -1.087573 |
| H | -6.370011 | -2.664458 | -1.729111 |
| H | -5.131408 | -1.399753 | -1.757079 |
| H | -6.395225 | -1.387661 | -0.505654 |
| C | -4.151415 | -3.926132 | -1.152275 |
| H | -4.916774 | -4.412419 | -1.786718 |
| H | -3.614307 | -4.728632 | -0.632254 |
| H | -3.448345 | -3.421980 | -1.827332 |
| C | -4.743258 | 3.114860  | 1.379360  |
| H | -5.656305 | 3.375652  | 0.827111  |
| H | -4.743877 | 3.717186  | 2.306449  |
| H | -4.809578 | 2.062200  | 1.675167  |
| C | -2.261254 | 3.268404  | 1.539330  |
| H | -2.022364 | 2.220728  | 1.769211  |
| H | -2.481677 | 3.780548  | 2.494231  |
| H | -1.355670 | 3.724930  | 1.129098  |
| C | -3.541500 | 4.932229  | 0.195594  |
| H | -4.382384 | 5.159666  | -0.474686 |
| H | -2.621290 | 5.300465  | -0.277693 |
| H | -3.690590 | 5.525830  | 1.117177  |
| C | -0.695560 | 3.464591  | -1.444522 |
| H | -0.285117 | 2.651887  | -0.829965 |
| H | -0.899432 | 4.317185  | -0.786370 |
| H | 0.088388  | 3.779790  | -2.156388 |
| C | -2.480545 | 4.213054  | -3.028643 |
| H | -3.232215 | 3.911281  | -3.772357 |
| H | -1.642262 | 4.671769  | -3.586563 |
| H | -2.920547 | 4.996623  | -2.398047 |
| C | -1.435265 | 1.968511  | -3.257448 |
| H | -2.240483 | 1.484783  | -3.823888 |

|   |           |           |           |
|---|-----------|-----------|-----------|
| H | -0.845350 | 1.188205  | -2.766157 |
| H | -0.770302 | 2.473050  | -3.982281 |
| C | -5.987136 | 1.279645  | -1.076288 |
| H | -6.838652 | 0.952188  | -1.700827 |
| H | -6.399441 | 1.850109  | -0.235757 |
| H | -5.512666 | 0.384908  | -0.672898 |
| C | -4.841662 | 1.410476  | -3.285710 |
| H | -5.842774 | 1.253309  | -3.728309 |
| H | -4.360595 | 0.425523  | -3.209049 |
| H | -4.263382 | 2.016081  | -3.997138 |
| C | -5.686900 | 3.474259  | -2.174385 |
| H | -6.639306 | 3.284498  | -2.706267 |
| H | -5.097152 | 4.157069  | -2.797991 |
| H | -5.942339 | 3.994383  | -1.241010 |
| C | 2.284189  | -4.721018 | 0.125287  |
| H | 1.301450  | -4.554271 | -0.329665 |
| H | 2.122099  | -5.313659 | 1.044414  |
| H | 2.887262  | -5.335403 | -0.558780 |
| C | 4.321346  | -3.848362 | 1.182210  |
| H | 4.072015  | -4.517834 | 2.026026  |
| H | 4.899841  | -3.013579 | 1.594120  |
| H | 4.967036  | -4.419096 | 0.497382  |
| C | 2.143833  | -2.714115 | 1.592244  |
| H | 1.181925  | -2.357598 | 1.214765  |
| H | 2.652027  | -1.847046 | 2.033850  |
| H | 1.939056  | -3.424227 | 2.413921  |
| C | 5.500629  | -3.323737 | -2.472812 |
| H | 4.952087  | -3.418622 | -3.418322 |
| H | 5.360035  | -4.251529 | -1.895456 |
| H | 6.576280  | -3.258607 | -2.725353 |
| C | 6.158387  | -1.946806 | -0.533744 |
| H | 6.347515  | -2.910233 | -0.047576 |
| H | 5.873176  | -1.232540 | 0.239956  |
| H | 7.118091  | -1.608769 | -0.965469 |
| C | 5.296577  | -0.831954 | -2.584558 |

|   |          |           |           |
|---|----------|-----------|-----------|
| H | 4.731308 | -0.902208 | -3.520108 |
| H | 6.365030 | -0.733471 | -2.851979 |
| H | 5.005471 | 0.099488  | -2.086215 |
| C | 2.277011 | -4.249554 | -2.984495 |
| H | 1.666183 | -4.901513 | -2.350691 |
| H | 3.306680 | -4.627104 | -2.962245 |
| H | 1.906697 | -4.372160 | -4.018957 |
| C | 0.665252 | -2.491072 | -2.274039 |
| H | 0.034513 | -2.816008 | -3.121443 |
| H | 0.461759 | -1.428416 | -2.098441 |
| H | 0.333834 | -3.039055 | -1.385363 |
| C | 2.481283 | -1.946793 | -3.873981 |
| H | 1.706590 | -2.161667 | -4.633374 |
| H | 3.442694 | -2.250559 | -4.310243 |
| H | 2.498277 | -0.861596 | -3.722009 |
| C | 5.018913 | -0.291973 | 2.397001  |
| H | 4.393938 | -0.949978 | 1.783577  |
| H | 5.219067 | -0.818467 | 3.348310  |
| H | 5.983390 | -0.163348 | 1.891668  |
| C | 5.380850 | 1.928461  | 3.421066  |
| H | 5.669545 | 1.414954  | 4.357482  |
| H | 5.007193 | 2.922449  | 3.695102  |
| H | 6.300751 | 2.061282  | 2.833956  |
| C | 3.166890 | 0.780641  | 3.663009  |
| H | 2.344325 | 0.211851  | 3.204621  |
| H | 2.746269 | 1.709578  | 4.072447  |
| H | 3.552223 | 0.192906  | 4.516929  |
| C | 6.382480 | 1.610985  | -0.081919 |
| H | 6.111026 | 0.618586  | -0.446874 |
| H | 6.858650 | 1.494798  | 0.901326  |
| H | 7.150818 | 2.013449  | -0.768493 |
| C | 5.733479 | 3.907211  | 0.550714  |
| H | 5.023668 | 4.740122  | 0.473775  |
| H | 6.630540 | 4.194644  | -0.030016 |
| H | 6.043417 | 3.813928  | 1.600029  |

|   |          |          |           |
|---|----------|----------|-----------|
| C | 4.795426 | 2.881945 | -1.508877 |
| H | 4.539065 | 1.973519 | -2.065471 |
| H | 5.661563 | 3.340003 | -2.022507 |
| H | 3.952227 | 3.577610 | -1.597884 |
| C | 3.047380 | 4.272077 | 2.602356  |
| H | 3.056430 | 3.747860 | 3.567663  |
| H | 2.379498 | 5.146010 | 2.717002  |
| H | 4.057062 | 4.653078 | 2.407285  |
| C | 2.233552 | 4.292590 | 0.243036  |
| H | 1.892816 | 3.727597 | -0.632537 |
| H | 3.120761 | 4.869450 | -0.049373 |
| H | 1.437718 | 5.017624 | 0.491771  |
| C | 1.103674 | 2.891658 | 1.939544  |
| H | 0.532015 | 2.438027 | 1.126243  |
| H | 0.529069 | 3.753862 | 2.320601  |
| H | 1.145926 | 2.139302 | 2.733097  |

--

B=N-[SiMe(SitBu3)2]2

--

| Atomic<br>Number | Coordinates (Angstroms) |           |           |
|------------------|-------------------------|-----------|-----------|
|                  | X                       | Y         | Z         |
| B                | -0.111613               | 0.679817  | -1.180442 |
| N                | -0.001097               | 0.097656  | 0.058149  |
| Si               | -1.905447               | -0.372032 | 0.433569  |
| Si               | -2.933928               | -1.858911 | -1.614255 |
| Si               | -3.226103               | 1.684874  | 1.621730  |
| C                | -1.840553               | -1.727437 | 1.750646  |
| H                | -1.601175               | -2.700968 | 1.312807  |
| H                | -2.826238               | -1.809920 | 2.226676  |
| H                | -1.120145               | -1.516799 | 2.537871  |
| C                | -4.383600               | -3.065575 | -0.971816 |

--

|   |           |           |           |
|---|-----------|-----------|-----------|
| C | -4.687954 | -4.161002 | -2.029562 |
| H | -4.947447 | -3.748774 | -3.013409 |
| H | -5.558503 | -4.746969 | -1.679239 |
| H | -3.860482 | -4.868898 | -2.160811 |
| C | -5.717762 | -2.337398 | -0.706325 |
| H | -5.635693 | -1.640419 | 0.132340  |
| H | -6.485098 | -3.084447 | -0.428974 |
| H | -6.099081 | -1.790585 | -1.579263 |
| C | -4.045549 | -3.797316 | 0.350238  |
| H | -4.835496 | -4.544083 | 0.555760  |
| H | -4.030189 | -3.104896 | 1.200547  |
| H | -3.087250 | -4.330275 | 0.327486  |
| C | -3.607543 | -0.645040 | -2.998910 |
| C | -4.421286 | 0.485931  | -2.343644 |
| H | -3.856930 | 0.959677  | -1.532754 |
| H | -5.378326 | 0.137117  | -1.934258 |
| H | -4.648539 | 1.266849  | -3.092284 |
| C | -4.526412 | -1.321203 | -4.046734 |
| H | -4.837523 | -0.560800 | -4.787731 |
| H | -5.444454 | -1.728798 | -3.599354 |
| H | -4.028090 | -2.129144 | -4.598540 |
| C | -2.439735 | 0.033805  | -3.754799 |
| H | -1.863312 | -0.676605 | -4.363384 |
| H | -1.739145 | 0.538835  | -3.069465 |
| H | -2.852849 | 0.794000  | -4.444195 |
| C | -1.510971 | -3.007360 | -2.355578 |
| C | -1.862860 | -3.524103 | -3.775808 |
| H | -1.062234 | -4.214035 | -4.103113 |
| H | -1.904060 | -2.709225 | -4.510978 |
| H | -2.809995 | -4.075138 | -3.822530 |
| C | -0.185333 | -2.237803 | -2.486055 |
| H | 0.553949  | -2.873026 | -3.006800 |
| H | 0.226629  | -1.976180 | -1.506705 |
| H | -0.285195 | -1.306892 | -3.053165 |
| C | -1.213732 | -4.242290 | -1.473233 |

|   |           |           |           |
|---|-----------|-----------|-----------|
| H | -1.011424 | -3.971341 | -0.430414 |
| H | -0.309386 | -4.748313 | -1.859058 |
| H | -2.024589 | -4.982754 | -1.480026 |
| C | -2.139587 | 2.078412  | 3.227940  |
| C | -3.393756 | 3.279955  | 0.447794  |
| C | -5.021590 | 1.096155  | 2.177485  |
| C | -5.800987 | 2.197130  | 2.946731  |
| H | -5.729441 | 3.186607  | 2.471031  |
| H | -5.474276 | 2.298883  | 3.988859  |
| H | -6.871897 | 1.919452  | 2.967282  |
| C | -4.963952 | -0.157645 | 3.077191  |
| H | -5.988352 | -0.425962 | 3.395601  |
| H | -4.365315 | -0.006081 | 3.986520  |
| H | -4.556609 | -1.022165 | 2.535164  |
| C | -5.876959 | 0.729280  | 0.943068  |
| H | -6.710552 | 0.072410  | 1.250756  |
| H | -5.295686 | 0.204043  | 0.181232  |
| H | -6.320174 | 1.611576  | 0.470487  |
| C | -2.295809 | 3.228931  | -0.629566 |
| H | -2.416980 | 2.382650  | -1.319083 |
| H | -1.297346 | 3.141474  | -0.191811 |
| H | -2.314242 | 4.154879  | -1.232792 |
| C | -4.747773 | 3.409210  | -0.290992 |
| H | -4.997175 | 2.533844  | -0.897279 |
| H | -4.677191 | 4.272681  | -0.977992 |
| H | -5.583995 | 3.611797  | 0.393782  |
| C | -3.227432 | 4.616002  | 1.221960  |
| H | -2.189173 | 4.799551  | 1.520867  |
| H | -3.866497 | 4.683362  | 2.116189  |
| H | -3.514679 | 5.446737  | 0.551717  |
| C | -0.921837 | 2.966572  | 2.883548  |
| H | -0.448681 | 2.666533  | 1.941422  |
| H | -0.163377 | 2.873587  | 3.681295  |
| H | -1.185281 | 4.028880  | 2.815726  |
| C | -2.927930 | 2.784907  | 4.356978  |

|    |           |           |           |
|----|-----------|-----------|-----------|
| H  | -2.214501 | 3.098639  | 5.142407  |
| H  | -3.459642 | 3.684093  | 4.015898  |
| H  | -3.655431 | 2.113028  | 4.834477  |
| C  | -1.560987 | 0.779318  | 3.830380  |
| H  | -0.801540 | 0.350690  | 3.167980  |
| H  | -2.316331 | 0.006809  | 4.025527  |
| H  | -1.063575 | 1.013486  | 4.789820  |
| Si | 1.881923  | 0.281316  | 0.517942  |
| Si | 3.214093  | -1.873516 | 1.413956  |
| Si | 2.881909  | 2.051137  | -1.462145 |
| C  | 1.934935  | 1.316213  | 2.110831  |
| H  | 1.293255  | 0.887161  | 2.893495  |
| H  | 1.638728  | 2.359383  | 1.962811  |
| H  | 2.965621  | 1.309294  | 2.494617  |
| C  | 1.902432  | -3.008532 | 2.319078  |
| C  | 2.478741  | -4.223638 | 3.086894  |
| H  | 1.634308  | -4.826803 | 3.471446  |
| H  | 3.075500  | -3.918444 | 3.957313  |
| H  | 3.093514  | -4.885271 | 2.463893  |
| C  | 0.944296  | -3.553186 | 1.243101  |
| H  | 0.537648  | -2.751587 | 0.613615  |
| H  | 0.096515  | -4.072331 | 1.724235  |
| H  | 1.435446  | -4.281686 | 0.585527  |
| C  | 1.078388  | -2.203902 | 3.350970  |
| H  | 0.180671  | -2.780982 | 3.632868  |
| H  | 0.749398  | -1.233220 | 2.960838  |
| H  | 1.637748  | -2.012383 | 4.273713  |
| C  | 4.008643  | -2.828431 | -0.106593 |
| C  | 3.047104  | -2.771996 | -1.313725 |
| H  | 2.126912  | -3.340424 | -1.141562 |
| H  | 3.540691  | -3.203379 | -2.204130 |
| H  | 2.757692  | -1.742756 | -1.564485 |
| C  | 4.311508  | -4.321153 | 0.177915  |
| H  | 3.403816  | -4.910997 | 0.367015  |
| H  | 4.996775  | -4.461770 | 1.025568  |

|   |          |           |           |
|---|----------|-----------|-----------|
| H | 4.797911 | -4.757324 | -0.714700 |
| C | 5.337604 | -2.182855 | -0.555053 |
| H | 6.124066 | -2.250091 | 0.209051  |
| H | 5.214488 | -1.130253 | -0.821445 |
| H | 5.708684 | -2.707677 | -1.454881 |
| C | 4.590047 | -1.393222 | 2.763969  |
| C | 5.530799 | -2.607691 | 2.993102  |
| H | 6.214611 | -2.368976 | 3.829319  |
| H | 6.156587 | -2.819391 | 2.115781  |
| H | 4.996740 | -3.528225 | 3.258569  |
| C | 5.505984 | -0.211011 | 2.392364  |
| H | 6.233907 | -0.056382 | 3.210783  |
| H | 4.956930 | 0.732170  | 2.269758  |
| H | 6.080642 | -0.394746 | 1.478362  |
| C | 3.969084 | -1.039902 | 4.138997  |
| H | 3.536353 | -1.917001 | 4.637075  |
| H | 3.195295 | -0.262217 | 4.076170  |
| H | 4.768351 | -0.658891 | 4.801215  |
| C | 1.741150 | 3.672550  | -1.558495 |
| C | 4.649403 | 2.602998  | -0.760455 |
| C | 3.114058 | 1.263006  | -3.255146 |
| C | 3.374892 | 2.366411  | -4.314636 |
| H | 4.237569 | 3.000956  | -4.071273 |
| H | 2.506156 | 3.018009  | -4.472041 |
| H | 3.590038 | 1.876236  | -5.282881 |
| C | 1.871452 | 0.466725  | -3.702551 |
| H | 2.020872 | 0.116150  | -4.741839 |
| H | 0.945359 | 1.051076  | -3.658768 |
| H | 1.723965 | -0.419420 | -3.073292 |
| C | 4.308735 | 0.285214  | -3.330029 |
| H | 5.277350 | 0.795684  | -3.239747 |
| H | 4.297646 | -0.217752 | -4.314749 |
| H | 4.255822 | -0.497231 | -2.564239 |
| C | 5.478285 | 1.349055  | -0.441751 |
| H | 4.880931 | 0.604768  | 0.091315  |



|   |           |          |           |
|---|-----------|----------|-----------|
| H | 6.338171  | 1.612508 | 0.199363  |
| H | 5.879156  | 0.877017 | -1.345559 |
| C | 5.511980  | 3.446785 | -1.733506 |
| H | 5.760667  | 2.891538 | -2.649036 |
| H | 6.470274  | 3.683223 | -1.232433 |
| H | 5.052021  | 4.397882 | -2.024376 |
| C | 4.509970  | 3.398876 | 0.559185  |
| H | 3.940697  | 2.849526 | 1.320239  |
| H | 4.027842  | 4.375131 | 0.417862  |
| H | 5.517150  | 3.589424 | 0.974561  |
| C | 2.540458  | 4.927998 | -1.994040 |
| H | 1.833695  | 5.774627 | -2.079106 |
| H | 3.021818  | 4.806265 | -2.974455 |
| H | 3.306956  | 5.223514 | -1.265738 |
| C | 0.559687  | 3.554707 | -2.549736 |
| H | 0.900087  | 3.503110 | -3.592651 |
| H | -0.071368 | 4.457512 | -2.457321 |
| H | -0.059183 | 2.670515 | -2.345894 |
| C | 1.160316  | 3.964554 | -0.160131 |
| H | 0.568927  | 3.117352 | 0.203431  |
| H | 1.939327  | 4.176068 | 0.584092  |
| H | 0.492565  | 4.843943 | -0.204387 |

-----  
 --

-----  
 --

SiiPrDis2-B≡N-SiiPrDis2

-----  
 --

| Atomic<br>Number | Coordinates (Angstroms) |   |   |
|------------------|-------------------------|---|---|
|                  | X                       | Y | Z |

-----  
 --

|   |           |           |           |
|---|-----------|-----------|-----------|
| B | 0.305208  | -0.349683 | -0.003104 |
| N | -0.949006 | -0.143949 | -0.120650 |

|    |           |           |           |
|----|-----------|-----------|-----------|
| Si | -2.538439 | 0.421345  | -0.545958 |
| Si | 2.248365  | -0.716085 | -0.332304 |
| C  | -3.166239 | 1.484862  | 0.901881  |
| H  | -4.258262 | 1.560384  | 0.754752  |
| C  | -3.698157 | -1.019350 | -1.089125 |
| H  | -3.939956 | -0.646690 | -2.105526 |
| C  | -2.313384 | 1.302971  | -2.237153 |
| H  | -2.043305 | 0.445834  | -2.882407 |
| C  | -1.142548 | 2.292819  | -2.350308 |
| H  | -0.963900 | 2.567532  | -3.405297 |
| H  | -0.216217 | 1.847677  | -1.959709 |
| H  | -1.318083 | 3.224423  | -1.796890 |
| C  | -3.624076 | 1.889153  | -2.806651 |
| H  | -3.448398 | 2.352406  | -3.793878 |
| H  | -4.053374 | 2.660236  | -2.152776 |
| H  | -4.396737 | 1.116033  | -2.945172 |
| C  | 2.148420  | -2.264433 | -1.465704 |
| H  | 1.558659  | -1.955712 | -2.341133 |
| C  | 1.377474  | -3.411064 | -0.786904 |
| H  | 1.215093  | -4.241013 | -1.496838 |
| H  | 0.396566  | -3.085531 | -0.421833 |
| H  | 1.933134  | -3.825462 | 0.070854  |
| C  | 3.510718  | -2.782451 | -1.960001 |
| H  | 3.370248  | -3.631514 | -2.652781 |
| H  | 4.126867  | -3.149889 | -1.122773 |
| H  | 4.091786  | -2.015692 | -2.488067 |
| C  | 2.678578  | 0.885830  | -1.336555 |
| H  | 1.631398  | 1.182843  | -1.566252 |
| C  | 3.229628  | -1.350333 | 1.193922  |
| H  | 3.226216  | -2.427197 | 0.918811  |
| Si | -2.793278 | -2.617002 | -1.603478 |
| Si | -5.486607 | -1.323277 | -0.503485 |
| Si | -2.611769 | 3.303977  | 1.023586  |
| Si | -2.955803 | 0.607731  | 2.586532  |
| C  | -3.909509 | -3.715829 | -2.670573 |

|   |           |           |           |
|---|-----------|-----------|-----------|
| H | -3.323175 | -4.587968 | -3.011054 |
| H | -4.252354 | -3.182840 | -3.573524 |
| H | -4.798558 | -4.101359 | -2.150599 |
| C | -1.353587 | -2.218983 | -2.760993 |
| H | -0.813593 | -3.144513 | -3.023256 |
| H | -0.635142 | -1.517266 | -2.321384 |
| H | -1.728866 | -1.780876 | -3.701839 |
| C | -2.216344 | -3.659669 | -0.146623 |
| H | -1.703412 | -4.564946 | -0.513936 |
| H | -3.066426 | -3.984952 | 0.471988  |
| H | -1.515935 | -3.120722 | 0.505473  |
| C | -6.562809 | -1.373437 | -2.060954 |
| H | -6.260049 | -2.163717 | -2.764443 |
| H | -6.519934 | -0.411142 | -2.600892 |
| H | -7.618860 | -1.551543 | -1.792922 |
| C | -6.265296 | 0.036432  | 0.552516  |
| H | -7.336267 | -0.203561 | 0.676339  |
| H | -6.209114 | 1.026379  | 0.070408  |
| H | -5.830137 | 0.115816  | 1.557634  |
| C | -5.781776 | -2.943957 | 0.428280  |
| H | -5.176435 | -3.041732 | 1.341144  |
| H | -5.587286 | -3.830316 | -0.194591 |
| H | -6.843294 | -2.984710 | 0.730433  |
| C | -3.186647 | 4.109412  | 2.639213  |
| H | -2.932227 | 5.183517  | 2.597898  |
| H | -2.707980 | 3.694540  | 3.538460  |
| H | -4.278507 | 4.035489  | 2.772369  |
| C | -3.425453 | 4.405880  | -0.282334 |
| H | -3.268931 | 5.460005  | 0.007487  |
| H | -4.515794 | 4.238112  | -0.319662 |
| H | -3.031226 | 4.284863  | -1.299461 |
| C | -0.735465 | 3.478952  | 0.954306  |
| H | -0.445073 | 4.450659  | 0.523482  |
| H | -0.268334 | 2.690438  | 0.351254  |
| H | -0.299682 | 3.422320  | 1.963427  |

|    |           |           |           |
|----|-----------|-----------|-----------|
| C  | -1.256330 | 0.965493  | 3.311787  |
| H  | -0.473664 | 0.738744  | 2.575940  |
| H  | -1.077071 | 0.334992  | 4.198026  |
| H  | -1.137121 | 2.015443  | 3.618701  |
| C  | -4.279663 | 1.153824  | 3.828786  |
| H  | -4.023295 | 2.091395  | 4.342669  |
| H  | -4.394897 | 0.372483  | 4.600464  |
| H  | -5.265461 | 1.295361  | 3.356267  |
| C  | -3.135684 | -1.260663 | 2.466042  |
| H  | -2.561575 | -1.699076 | 1.642904  |
| H  | -4.189076 | -1.546122 | 2.340344  |
| H  | -2.780725 | -1.721679 | 3.403683  |
| Si | 3.283549  | 0.870753  | -3.151424 |
| Si | 3.194862  | 2.439930  | -0.346816 |
| Si | 2.336432  | -1.529337 | 2.876907  |
| Si | 5.119755  | -1.103261 | 1.314490  |
| C  | 2.210288  | -0.250391 | -4.233792 |
| H  | 2.346944  | 0.043633  | -5.289147 |
| H  | 1.138817  | -0.139957 | -3.998349 |
| H  | 2.464757  | -1.317236 | -4.156577 |
| C  | 3.036693  | 2.598265  | -3.882284 |
| H  | 3.231020  | 2.547774  | -4.968011 |
| H  | 3.727582  | 3.344162  | -3.460783 |
| H  | 2.009726  | 2.971511  | -3.745105 |
| C  | 5.096383  | 0.460049  | -3.485862 |
| H  | 5.274717  | 0.605331  | -4.566520 |
| H  | 5.381065  | -0.573099 | -3.243055 |
| H  | 5.784283  | 1.130104  | -2.947136 |
| C  | 2.274119  | 3.975724  | -0.960979 |
| H  | 2.788000  | 4.470651  | -1.797935 |
| H  | 2.210346  | 4.703050  | -0.133382 |
| H  | 1.245960  | 3.755397  | -1.281340 |
| C  | 2.711516  | 2.215255  | 1.452249  |
| H  | 2.950487  | 3.118322  | 2.039151  |
| H  | 3.233657  | 1.369713  | 1.911449  |

|   |           |           |           |
|---|-----------|-----------|-----------|
| H | 1.631626  | 2.033658  | 1.551764  |
| C | 5.033722  | 2.861038  | -0.425275 |
| H | 5.391803  | 2.969558  | -1.461850 |
| H | 5.675364  | 2.124859  | 0.078326  |
| H | 5.187790  | 3.832514  | 0.077084  |
| C | 5.658734  | 0.159347  | 2.609280  |
| H | 5.319892  | 1.182942  | 2.392323  |
| H | 6.762155  | 0.177887  | 2.647842  |
| H | 5.299458  | -0.108887 | 3.615228  |
| C | 5.878846  | -0.628753 | -0.340299 |
| H | 5.961708  | -1.506434 | -0.998696 |
| H | 6.897689  | -0.231895 | -0.191153 |
| H | 5.300929  | 0.131990  | -0.873289 |
| C | 5.934169  | -2.751269 | 1.764192  |
| H | 7.023056  | -2.675805 | 1.596580  |
| H | 5.561364  | -3.569742 | 1.124300  |
| H | 5.779171  | -3.048560 | 2.811163  |
| C | 3.270914  | -2.786220 | 3.940299  |
| H | 4.226963  | -2.394447 | 4.322639  |
| H | 3.480471  | -3.722414 | 3.397406  |
| H | 2.649572  | -3.042524 | 4.816297  |
| C | 0.614061  | -2.265415 | 2.649321  |
| H | -0.059320 | -1.639163 | 2.049027  |
| H | 0.143100  | -2.392685 | 3.639358  |
| H | 0.660703  | -3.257954 | 2.173706  |
| C | 2.187081  | 0.013756  | 3.947800  |
| H | 1.557186  | 0.797859  | 3.511934  |
| H | 3.166095  | 0.457088  | 4.184308  |
| H | 1.721387  | -0.289241 | 4.902463  |

-----  
--  
-----  
--  
[SiiPrDis2]-B=N  
-----

--

| Atomic<br>Number | Coordinates (Angstroms) |   |   |
|------------------|-------------------------|---|---|
|                  | X                       | Y | Z |

--

|    |           |           |           |
|----|-----------|-----------|-----------|
| N  | 0.386447  | -0.172387 | 1.444456  |
| B  | -0.149286 | -0.273350 | 0.265302  |
| Si | -1.963683 | 0.391506  | -0.382886 |
| Si | 1.849684  | -0.357364 | -0.505824 |
| C  | -2.787737 | 1.077239  | 1.208030  |
| H  | -3.843499 | 1.221613  | 0.911263  |
| C  | -3.133488 | -0.835092 | -1.285924 |
| H  | -2.790704 | -0.659184 | -2.321068 |
| C  | -1.338019 | 1.624789  | -1.787929 |
| H  | -0.246399 | 1.544826  | -1.669227 |
| C  | -1.642674 | 3.128823  | -1.700303 |
| H  | -1.092358 | 3.662494  | -2.496305 |
| H  | -1.327821 | 3.563785  | -0.745559 |
| H  | -2.709044 | 3.348743  | -1.842084 |
| C  | -1.639898 | 1.136700  | -3.222197 |
| H  | -1.160692 | 1.805942  | -3.956034 |
| H  | -2.717054 | 1.143539  | -3.443639 |
| H  | -1.260529 | 0.122491  | -3.416852 |
| C  | 1.430470  | -0.879006 | -2.319358 |
| H  | 0.914764  | -0.005124 | -2.739911 |
| C  | 0.481262  | -2.071278 | -2.450045 |
| H  | 0.296627  | -2.297073 | -3.514858 |
| H  | -0.483212 | -1.865758 | -1.977450 |
| H  | 0.890977  | -2.985446 | -1.991986 |
| C  | 2.690572  | -1.142099 | -3.165932 |
| H  | 2.396080  | -1.321182 | -4.215951 |
| H  | 3.223322  | -2.041781 | -2.822593 |
| H  | 3.399214  | -0.306381 | -3.159555 |
| C  | 2.428449  | 1.492588  | -0.540582 |
| H  | 1.438322  | 1.957373  | -0.341835 |

|    |           |           |           |
|----|-----------|-----------|-----------|
| C  | 2.790161  | -1.839942 | 0.265650  |
| H  | 2.448369  | -2.623542 | -0.447741 |
| Si | -3.125342 | -2.758741 | -1.396577 |
| Si | -4.904383 | -0.136798 | -1.430055 |
| Si | -2.323153 | 2.793609  | 1.917311  |
| Si | -2.994146 | -0.163521 | 2.659623  |
| C  | -4.689416 | -3.661597 | -0.833873 |
| H  | -4.550495 | -4.724900 | -1.100807 |
| H  | -5.611121 | -3.319524 | -1.326206 |
| H  | -4.840766 | -3.620697 | 0.254747  |
| C  | -2.968404 | -3.150548 | -3.244608 |
| H  | -2.865681 | -4.240585 | -3.387979 |
| H  | -2.086086 | -2.673342 | -3.699945 |
| H  | -3.852660 | -2.823815 | -3.812814 |
| C  | -1.710868 | -3.650277 | -0.519531 |
| H  | -1.249973 | -4.381286 | -1.204946 |
| H  | -2.074953 | -4.202364 | 0.359827  |
| H  | -0.918484 | -2.977171 | -0.178463 |
| C  | -5.689336 | -0.789403 | -3.020754 |
| H  | -5.877100 | -1.872935 | -3.008976 |
| H  | -5.045179 | -0.571433 | -3.889511 |
| H  | -6.655317 | -0.283453 | -3.189592 |
| C  | -4.960610 | 1.744113  | -1.624144 |
| H  | -6.020223 | 2.054546  | -1.622954 |
| H  | -4.526988 | 2.078078  | -2.578901 |
| H  | -4.460031 | 2.295493  | -0.817812 |
| C  | -6.022738 | -0.538676 | 0.031650  |
| H  | -6.128263 | -1.616715 | 0.213715  |
| H  | -7.029190 | -0.134147 | -0.173578 |
| H  | -5.669819 | -0.075758 | 0.963868  |
| C  | -2.746955 | 3.038668  | 3.750196  |
| H  | -2.375159 | 4.041923  | 4.026498  |
| H  | -2.285832 | 2.319909  | 4.440295  |
| H  | -3.833462 | 3.036134  | 3.926448  |
| C  | -3.388737 | 4.139215  | 1.117836  |

|    |           |           |           |
|----|-----------|-----------|-----------|
| H  | -3.211214 | 4.316413  | 0.050434  |
| H  | -3.226368 | 5.093676  | 1.648985  |
| H  | -4.455308 | 3.880030  | 1.242232  |
| C  | -0.483054 | 3.149809  | 1.791327  |
| H  | -0.278170 | 4.190603  | 2.093717  |
| H  | -0.070604 | 3.001921  | 0.785252  |
| H  | 0.081988  | 2.483782  | 2.460370  |
| C  | -1.590152 | -0.231388 | 3.929813  |
| H  | -0.945567 | 0.657072  | 3.959790  |
| H  | -0.935207 | -1.094515 | 3.741935  |
| H  | -2.040956 | -0.358066 | 4.931817  |
| C  | -4.610661 | 0.323600  | 3.544471  |
| H  | -4.423828 | 0.778263  | 4.529493  |
| H  | -5.240416 | -0.568006 | 3.705852  |
| H  | -5.207828 | 1.044004  | 2.961725  |
| C  | -3.231101 | -1.930568 | 2.078058  |
| H  | -2.377688 | -2.284154 | 1.490094  |
| H  | -4.141170 | -2.041375 | 1.476326  |
| H  | -3.322510 | -2.593254 | 2.956357  |
| Si | 2.894779  | 2.458596  | -2.150534 |
| Si | 3.388772  | 2.194016  | 0.980745  |
| Si | 2.297246  | -2.743502 | 1.908143  |
| Si | 4.686763  | -1.929710 | -0.006679 |
| C  | 1.807441  | 2.211961  | -3.680063 |
| H  | 2.177601  | 2.932659  | -4.431379 |
| H  | 0.755576  | 2.462493  | -3.491243 |
| H  | 1.850600  | 1.217210  | -4.141067 |
| C  | 2.664954  | 4.305996  | -1.806197 |
| H  | 2.758174  | 4.845540  | -2.764914 |
| H  | 3.413604  | 4.723132  | -1.118357 |
| H  | 1.667130  | 4.532585  | -1.397223 |
| C  | 4.659992  | 2.273862  | -2.805813 |
| H  | 4.805145  | 3.084027  | -3.542976 |
| H  | 4.832540  | 1.324008  | -3.333088 |
| H  | 5.442271  | 2.378447  | -2.042516 |



|   |           |           |           |
|---|-----------|-----------|-----------|
| C | 2.842006  | 3.960490  | 1.417210  |
| H | 3.611771  | 4.696085  | 1.133262  |
| H | 2.708852  | 4.026926  | 2.510077  |
| H | 1.896856  | 4.273671  | 0.957666  |
| C | 3.093493  | 1.150069  | 2.498940  |
| H | 3.578947  | 1.620360  | 3.371526  |
| H | 3.518229  | 0.148059  | 2.379780  |
| H | 2.023693  | 1.020668  | 2.708909  |
| C | 5.259713  | 2.316362  | 0.749914  |
| H | 5.541458  | 3.072206  | 0.000161  |
| H | 5.746627  | 1.369340  | 0.483658  |
| H | 5.682940  | 2.645506  | 1.715785  |
| C | 5.670710  | -1.660025 | 1.581383  |
| H | 5.518208  | -0.645826 | 1.981526  |
| H | 6.745148  | -1.762554 | 1.349554  |
| H | 5.431534  | -2.375498 | 2.380544  |
| C | 5.362662  | -0.665661 | -1.232636 |
| H | 5.334855  | -1.047622 | -2.262732 |
| H | 6.417939  | -0.455767 | -0.989916 |
| H | 4.829412  | 0.288824  | -1.215144 |
| C | 5.123460  | -3.604964 | -0.770889 |
| H | 6.133264  | -3.555566 | -1.213732 |
| H | 4.421339  | -3.852783 | -1.586390 |
| H | 5.108340  | -4.439831 | -0.056738 |
| C | 3.250668  | -4.387315 | 1.945188  |
| H | 4.337752  | -4.297858 | 2.082016  |
| H | 3.070990  | -4.979645 | 1.032456  |
| H | 2.859606  | -4.975090 | 2.794178  |
| C | 0.522166  | -3.362981 | 2.019423  |
| H | -0.224460 | -2.571562 | 1.912075  |
| H | 0.407564  | -3.802959 | 3.026800  |
| H | 0.313771  | -4.161391 | 1.292187  |
| C | 2.622443  | -1.908849 | 3.565766  |
| H | 1.920203  | -1.084198 | 3.748311  |
| H | 3.645852  | -1.537172 | 3.710238  |

H 2.441043 -2.683598 4.332892

--

--

B=N-[SiiPrDis2]2

--

| Atomic<br>Number | Coordinates (Angstroms) |   |   |
|------------------|-------------------------|---|---|
|                  | X                       | Y | Z |

--

|    |           |           |           |
|----|-----------|-----------|-----------|
| B  | 0.081082  | -0.212414 | 1.496489  |
| N  | -0.086748 | -0.242690 | 0.132817  |
| Si | -1.751433 | 0.395309  | -0.388185 |
| Si | 1.679661  | -0.350817 | -0.557813 |
| C  | -2.616530 | 1.055423  | 1.202488  |
| H  | -3.653727 | 1.191250  | 0.836682  |
| C  | -2.979843 | -0.791448 | -1.289164 |
| H  | -2.646875 | -0.618280 | -2.327845 |
| C  | -1.191594 | 1.637578  | -1.787899 |
| H  | -0.098144 | 1.554405  | -1.710472 |
| C  | -1.491241 | 3.141514  | -1.663708 |
| H  | -0.951841 | 3.690348  | -2.456069 |
| H  | -1.167991 | 3.561389  | -0.705407 |
| H  | -2.558866 | 3.361250  | -1.791284 |
| C  | -1.546529 | 1.191019  | -3.225241 |
| H  | -1.070201 | 1.865034  | -3.955910 |
| H  | -2.628440 | 1.234158  | -3.416061 |
| H  | -1.202825 | 0.172546  | -3.457741 |
| C  | 1.395737  | -0.867190 | -2.372892 |
| H  | 0.911317  | 0.006911  | -2.830441 |
| C  | 0.435639  | -2.048929 | -2.529362 |
| H  | 0.276521  | -2.274981 | -3.597965 |
| H  | -0.537842 | -1.836227 | -2.080985 |

|    |           |           |           |
|----|-----------|-----------|-----------|
| H  | 0.823961  | -2.966576 | -2.059158 |
| C  | 2.676426  | -1.156765 | -3.171907 |
| H  | 2.422538  | -1.352611 | -4.228668 |
| H  | 3.188111  | -2.053293 | -2.790894 |
| H  | 3.392955  | -0.328622 | -3.151694 |
| C  | 2.367723  | 1.472508  | -0.513091 |
| H  | 1.404744  | 1.989113  | -0.317097 |
| C  | 2.608557  | -1.826931 | 0.281152  |
| H  | 2.267692  | -2.623075 | -0.419897 |
| Si | -3.063708 | -2.715498 | -1.434759 |
| Si | -4.750094 | -0.055383 | -1.441173 |
| Si | -2.231583 | 2.784616  | 1.932840  |
| Si | -2.972049 | -0.168165 | 2.656100  |
| C  | -4.662068 | -3.574126 | -0.890796 |
| H  | -4.545993 | -4.638620 | -1.164312 |
| H  | -5.569837 | -3.209403 | -1.392685 |
| H  | -4.827305 | -3.538180 | 0.195687  |
| C  | -2.935712 | -3.091409 | -3.289461 |
| H  | -2.856820 | -4.182547 | -3.439686 |
| H  | -2.050594 | -2.630413 | -3.754287 |
| H  | -3.821211 | -2.745701 | -3.844776 |
| C  | -1.688782 | -3.671633 | -0.566905 |
| H  | -1.268892 | -4.422098 | -1.257385 |
| H  | -2.078594 | -4.206933 | 0.311851  |
| H  | -0.867265 | -3.033295 | -0.229958 |
| C  | -5.534647 | -0.673250 | -3.049230 |
| H  | -5.754318 | -1.750573 | -3.054270 |
| H  | -4.888587 | -0.458969 | -3.917023 |
| H  | -6.488417 | -0.140709 | -3.209609 |
| C  | -4.814060 | 1.827773  | -1.617511 |
| H  | -5.878643 | 2.121022  | -1.639716 |
| H  | -4.364741 | 2.178396  | -2.558678 |
| H  | -4.345246 | 2.378306  | -0.792452 |
| C  | -5.920980 | -0.459718 | -0.021256 |
| H  | -6.052259 | -1.537670 | 0.139519  |

|    |           |           |           |
|----|-----------|-----------|-----------|
| H  | -6.911694 | -0.036921 | -0.265056 |
| H  | -5.604179 | -0.014364 | 0.931079  |
| C  | -2.704179 | 3.021687  | 3.754174  |
| H  | -2.331897 | 4.021227  | 4.043322  |
| H  | -2.271261 | 2.297321  | 4.456036  |
| H  | -3.795223 | 3.030138  | 3.898887  |
| C  | -3.305749 | 4.118802  | 1.123343  |
| H  | -3.093956 | 4.337188  | 0.069493  |
| H  | -3.183816 | 5.059165  | 1.690312  |
| H  | -4.370825 | 3.836101  | 1.201475  |
| C  | -0.399820 | 3.179726  | 1.852386  |
| H  | -0.215415 | 4.223379  | 2.157301  |
| H  | 0.038154  | 3.038008  | 0.856483  |
| H  | 0.154659  | 2.521407  | 2.538881  |
| C  | -1.723887 | -0.279138 | 4.076518  |
| H  | -1.067714 | 0.595513  | 4.170373  |
| H  | -1.064923 | -1.149073 | 3.949499  |
| H  | -2.286547 | -0.398992 | 5.021911  |
| C  | -4.636147 | 0.375414  | 3.416423  |
| H  | -4.496946 | 0.842646  | 4.403575  |
| H  | -5.287540 | -0.504772 | 3.557018  |
| H  | -5.188155 | 1.094630  | 2.789691  |
| C  | -3.239935 | -1.923447 | 2.047011  |
| H  | -2.390489 | -2.304971 | 1.468849  |
| H  | -4.141263 | -1.995071 | 1.425749  |
| H  | -3.373793 | -2.591015 | 2.916324  |
| Si | 2.913212  | 2.448154  | -2.095471 |
| Si | 3.357030  | 2.121315  | 1.020551  |
| Si | 2.160142  | -2.760905 | 1.929060  |
| Si | 4.521760  | -1.948249 | 0.022594  |
| C  | 1.873372  | 2.241951  | -3.662308 |
| H  | 2.285270  | 2.960139  | -4.393770 |
| H  | 0.821639  | 2.514025  | -3.508077 |
| H  | 1.911845  | 1.248834  | -4.127944 |
| C  | 2.719784  | 4.297673  | -1.738218 |

|   |          |           |           |
|---|----------|-----------|-----------|
| H | 2.840934 | 4.842618  | -2.690462 |
| H | 3.468334 | 4.689358  | -1.035958 |
| H | 1.722520 | 4.544266  | -1.340343 |
| C | 4.691050 | 2.242452  | -2.711944 |
| H | 4.861083 | 3.063366  | -3.432167 |
| H | 4.859818 | 1.300626  | -3.254611 |
| H | 5.461911 | 2.324010  | -1.934381 |
| C | 2.862997 | 3.900547  | 1.473999  |
| H | 3.660565 | 4.614306  | 1.212441  |
| H | 2.715018 | 3.958645  | 2.565443  |
| H | 1.937608 | 4.251498  | 1.003545  |
| C | 3.039712 | 1.078809  | 2.537838  |
| H | 3.504154 | 1.560206  | 3.416586  |
| H | 3.479653 | 0.081755  | 2.432782  |
| H | 1.965860 | 0.934029  | 2.734109  |
| C | 5.235338 | 2.205160  | 0.818030  |
| H | 5.546002 | 2.972947  | 0.092146  |
| H | 5.712199 | 1.256560  | 0.541710  |
| H | 5.646097 | 2.505533  | 1.799269  |
| C | 5.513288 | -1.733931 | 1.617745  |
| H | 5.394809 | -0.727172 | 2.046652  |
| H | 6.582682 | -1.857894 | 1.370596  |
| H | 5.268463 | -2.464325 | 2.401076  |
| C | 5.276437 | -0.703917 | -1.175660 |
| H | 5.265502 | -1.078438 | -2.208114 |
| H | 6.332334 | -0.544445 | -0.898171 |
| H | 4.787990 | 0.272480  | -1.166237 |
| C | 4.953100 | -3.624436 | -0.749008 |
| H | 5.964231 | -3.560438 | -1.188102 |
| H | 4.258732 | -3.879942 | -1.568059 |
| H | 4.950724 | -4.461365 | -0.038012 |
| C | 3.106795 | -4.410548 | 1.923351  |
| H | 4.192005 | -4.331637 | 2.079159  |
| H | 2.936299 | -4.977878 | 0.993795  |
| H | 2.701367 | -5.017034 | 2.752453  |

|   |           |           |          |
|---|-----------|-----------|----------|
| C | 0.387657  | -3.388559 | 2.047151 |
| H | -0.373102 | -2.612306 | 1.916735 |
| H | 0.264117  | -3.803342 | 3.063532 |
| H | 0.197325  | -4.203392 | 1.333380 |
| C | 2.521583  | -1.971107 | 3.601444 |
| H | 1.832614  | -1.143521 | 3.817010 |
| H | 3.552183  | -1.618844 | 3.739359 |
| H | 2.341391  | -2.763813 | 4.350576 |

-----  
--

-----  
--

Tbt2-B≡N-Tbt2

-----  
--

| Atomic<br>Number | Coordinates (Angstroms) |   |   |
|------------------|-------------------------|---|---|
|                  | X                       | Y | Z |

-----  
--

|    |          |           |           |
|----|----------|-----------|-----------|
| C  | 2.811365 | 1.309808  | 0.396252  |
| C  | 3.659643 | -1.352280 | -0.023245 |
| C  | 4.069665 | 1.019658  | -0.164364 |
| C  | 1.921920 | 0.221355  | 0.677304  |
| C  | 2.405082 | -1.126415 | 0.572761  |
| C  | 4.485567 | -0.293423 | -0.454340 |
| H  | 4.746228 | 1.840780  | -0.402554 |
| H  | 3.998779 | -2.377618 | -0.160711 |
| C  | 2.455382 | 2.737937  | 0.753908  |
| H  | 1.368654 | 2.780832  | 0.965126  |
| C  | 5.773018 | -0.537404 | -1.206778 |
| H  | 6.272976 | 0.444608  | -1.327750 |
| C  | 1.605161 | -2.298111 | 1.114951  |
| H  | 0.678230 | -1.895926 | 1.564778  |
| Si | 0.997754 | -3.453139 | -0.282685 |
| Si | 2.529258 | -3.073913 | 2.603037  |

|    |           |           |           |
|----|-----------|-----------|-----------|
| Si | 7.053697  | -1.576949 | -0.249311 |
| Si | 5.382275  | -1.040799 | -3.009421 |
| Si | 3.256486  | 3.157107  | 2.446259  |
| Si | 2.741495  | 4.030184  | -0.621297 |
| C  | 4.013314  | -4.140961 | 2.136077  |
| H  | 3.738749  | -5.037137 | 1.560880  |
| H  | 4.500443  | -4.480328 | 3.067393  |
| H  | 4.768450  | -3.585537 | 1.563202  |
| C  | 3.184717  | -1.693689 | 3.703189  |
| H  | 3.832930  | -1.007113 | 3.136709  |
| H  | 3.783350  | -2.115080 | 4.529287  |
| H  | 2.373996  | -1.098008 | 4.146069  |
| C  | 1.354133  | -4.161346 | 3.597697  |
| H  | 0.479320  | -3.600258 | 3.959248  |
| H  | 1.878161  | -4.566849 | 4.480546  |
| H  | 0.986595  | -5.018183 | 3.009810  |
| C  | -0.510179 | -4.478663 | 0.201202  |
| H  | -0.401893 | -4.974589 | 1.177943  |
| H  | -0.654851 | -5.266846 | -0.558586 |
| H  | -1.430895 | -3.878887 | 0.230720  |
| C  | 2.301149  | -4.697677 | -0.848735 |
| H  | 2.005976  | -5.110149 | -1.829362 |
| H  | 2.365062  | -5.543805 | -0.145035 |
| H  | 3.309117  | -4.276649 | -0.960266 |
| C  | 0.494703  | -2.343292 | -1.709967 |
| H  | 1.326694  | -1.717886 | -2.068004 |
| H  | -0.323209 | -1.667772 | -1.410957 |
| H  | 0.132976  | -2.951657 | -2.553528 |
| C  | 6.851748  | -1.223609 | 1.590105  |
| H  | 5.842875  | -1.476949 | 1.947878  |
| H  | 7.016467  | -0.152673 | 1.797620  |
| H  | 7.580472  | -1.798618 | 2.186588  |
| C  | 6.897160  | -3.429113 | -0.576497 |
| H  | 7.575156  | -3.991805 | 0.088177  |
| H  | 7.173055  | -3.675334 | -1.615240 |

|   |          |           |           |
|---|----------|-----------|-----------|
| H | 5.878757 | -3.809153 | -0.404738 |
| C | 8.777764 | -1.020985 | -0.776188 |
| H | 9.550835 | -1.544414 | -0.187402 |
| H | 8.912633 | 0.061787  | -0.610676 |
| H | 8.975699 | -1.224033 | -1.840278 |
| C | 6.982171 | -1.166221 | -4.001696 |
| H | 7.598387 | -0.256751 | -3.905075 |
| H | 6.750269 | -1.299126 | -5.072732 |
| H | 7.597774 | -2.025553 | -3.689275 |
| C | 4.441493 | -2.662974 | -3.152545 |
| H | 4.246683 | -2.876373 | -4.218298 |
| H | 3.466380 | -2.605975 | -2.648248 |
| H | 4.990853 | -3.520613 | -2.737054 |
| C | 4.290713 | 0.305269  | -3.745195 |
| H | 4.034800 | 0.084008  | -4.795427 |
| H | 4.777447 | 1.294449  | -3.717992 |
| H | 3.348133 | 0.381361  | -3.180628 |
| C | 2.991290 | 4.973732  | 2.880425  |
| H | 3.370915 | 5.167423  | 3.898882  |
| H | 1.921887 | 5.240319  | 2.868248  |
| H | 3.516289 | 5.657884  | 2.195496  |
| C | 2.433336 | 2.102123  | 3.761466  |
| H | 1.376767 | 2.379726  | 3.889236  |
| H | 2.936783 | 2.214546  | 4.736838  |
| H | 2.467812 | 1.039705  | 3.485035  |
| C | 5.102022 | 2.775352  | 2.442500  |
| H | 5.282387 | 1.699518  | 2.292909  |
| H | 5.540773 | 3.057678  | 3.415439  |
| H | 5.649386 | 3.320452  | 1.658009  |
| C | 1.714661 | 5.581270  | -0.262040 |
| H | 1.216213 | 5.933448  | -1.180438 |
| H | 2.352244 | 6.400491  | 0.107538  |
| H | 0.930067 | 5.409599  | 0.488465  |
| C | 2.212994 | 3.253808  | -2.246654 |
| H | 2.880486 | 2.425752  | -2.520476 |



|    |           |           |           |
|----|-----------|-----------|-----------|
| H  | 2.229019  | 3.986063  | -3.070874 |
| H  | 1.195931  | 2.843229  | -2.176283 |
| C  | 4.539417  | 4.593665  | -0.780190 |
| H  | 5.226743  | 3.782535  | -1.067900 |
| H  | 4.914055  | 5.036851  | 0.156583  |
| H  | 4.606752  | 5.371961  | -1.560870 |
| C  | -3.182931 | 0.151467  | 1.158448  |
| C  | -3.662782 | 0.098078  | -1.612367 |
| C  | -2.127872 | 0.477232  | 0.249118  |
| C  | -4.395118 | -0.334851 | 0.627271  |
| C  | -4.639084 | -0.436843 | -0.754356 |
| C  | -2.424184 | 0.585000  | -1.157416 |
| H  | -5.169961 | -0.647233 | 1.330895  |
| H  | -3.882291 | 0.138549  | -2.680217 |
| C  | -3.115724 | 0.336621  | 2.668909  |
| H  | -4.132987 | 0.064443  | 3.018307  |
| C  | -1.514133 | 1.324202  | -2.125520 |
| H  | -0.474063 | 1.265393  | -1.758929 |
| C  | -5.878116 | -1.102151 | -1.317793 |
| H  | -5.882023 | -0.915314 | -2.411020 |
| Si | -7.517245 | -0.333478 | -0.730623 |
| Si | -5.665016 | -2.994778 | -1.198133 |
| Si | -1.463252 | 0.758466  | -3.951192 |
| Si | -2.014095 | 3.182580  | -1.963334 |
| Si | -3.067881 | 2.164730  | 3.206654  |
| Si | -2.088958 | -0.921354 | 3.656694  |
| C  | -4.076224 | -3.448283 | -2.106423 |
| H  | -4.131678 | -3.187772 | -3.176706 |
| H  | -3.870717 | -4.530132 | -2.034246 |
| H  | -3.215113 | -2.911714 | -1.677510 |
| C  | -7.122624 | -3.872317 | -2.015447 |
| H  | -7.291140 | -3.509749 | -3.043456 |
| H  | -8.058616 | -3.727602 | -1.451263 |
| H  | -6.934766 | -4.958733 | -2.071267 |
| C  | -5.499741 | -3.588846 | 0.580920  |

|   |           |           |           |
|---|-----------|-----------|-----------|
| H | -5.372728 | -4.685279 | 0.601432  |
| H | -6.376008 | -3.338403 | 1.197605  |
| H | -4.612741 | -3.142562 | 1.054452  |
| C | -8.155389 | -1.077813 | 0.883560  |
| H | -8.397524 | -2.147521 | 0.770269  |
| H | -9.078442 | -0.561003 | 1.199467  |
| H | -7.425423 | -0.983767 | 1.703911  |
| C | -8.820010 | -0.604113 | -2.070321 |
| H | -9.044340 | -1.671057 | -2.227190 |
| H | -8.485114 | -0.187519 | -3.036035 |
| H | -9.764350 | -0.099627 | -1.801645 |
| C | -7.263931 | 1.518836  | -0.499380 |
| H | -6.908816 | 1.988638  | -1.431750 |
| H | -6.512724 | 1.725325  | 0.278127  |
| H | -8.206020 | 2.014411  | -0.207632 |
| C | 0.175693  | 1.329892  | -4.691392 |
| H | 1.027308  | 0.924214  | -4.121472 |
| H | 0.284363  | 2.423820  | -4.715794 |
| H | 0.265185  | 0.961021  | -5.728128 |
| C | -1.549598 | -1.108420 | -4.195684 |
| H | -1.836090 | -1.318663 | -5.241198 |
| H | -2.281465 | -1.599171 | -3.539159 |
| H | -0.570771 | -1.573848 | -4.018672 |
| C | -2.873894 | 1.469248  | -4.998734 |
| H | -2.941949 | 2.566337  | -4.969224 |
| H | -3.857420 | 1.068153  | -4.703638 |
| H | -2.707966 | 1.177866  | -6.051140 |
| C | -1.441170 | 3.810498  | -0.290807 |
| H | -1.942437 | 3.278275  | 0.524175  |
| H | -1.651498 | 4.887286  | -0.178953 |
| H | -0.361494 | 3.659518  | -0.165462 |
| C | -1.245751 | 4.316940  | -3.266669 |
| H | -1.538058 | 4.067832  | -4.297557 |
| H | -0.147680 | 4.325770  | -3.219720 |
| H | -1.590850 | 5.347156  | -3.066711 |

|   |           |           |           |
|---|-----------|-----------|-----------|
| C | -3.887066 | 3.368012  | -2.058645 |
| H | -4.390116 | 2.774571  | -1.282069 |
| H | -4.293448 | 3.050451  | -3.030898 |
| H | -4.161870 | 4.426778  | -1.909157 |
| C | -4.277093 | 3.099704  | 2.100942  |
| H | -4.085050 | 2.919567  | 1.033824  |
| H | -4.229705 | 4.187685  | 2.277985  |
| H | -5.310176 | 2.770590  | 2.306551  |
| C | -3.707219 | 2.282945  | 4.981795  |
| H | -2.993483 | 1.858765  | 5.706979  |
| H | -4.669571 | 1.759481  | 5.110863  |
| H | -3.864240 | 3.340975  | 5.256383  |
| C | -1.358477 | 2.960182  | 3.186339  |
| H | -0.756240 | 2.634100  | 2.329971  |
| H | -0.812308 | 2.696843  | 4.105616  |
| H | -1.444779 | 4.059557  | 3.152877  |
| C | -3.032216 | -1.323876 | 5.245628  |
| H | -3.053890 | -0.474857 | 5.947575  |
| H | -2.557775 | -2.173146 | 5.768065  |
| H | -4.077499 | -1.607969 | 5.033615  |
| C | -0.370165 | -0.355428 | 4.161174  |
| H | -0.415887 | 0.515706  | 4.833594  |
| H | 0.249910  | -0.075857 | 3.299283  |
| H | 0.143615  | -1.164367 | 4.706759  |
| C | -2.006291 | -2.475605 | 2.610946  |
| H | -3.021147 | -2.859095 | 2.420966  |
| H | -1.428679 | -3.281844 | 3.086358  |
| H | -1.553695 | -2.254291 | 1.634894  |
| B | 0.420115  | 0.449764  | 0.787106  |
| N | -0.833742 | 0.651841  | 0.699917  |

-----  
--

-----  
--

Tbt2-B=N

| -----  |                         |           |           |
|--------|-------------------------|-----------|-----------|
| --     |                         |           |           |
| Atomic | Coordinates (Angstroms) |           |           |
| Number | X                       | Y         | Z         |
| -----  |                         |           |           |
| --     |                         |           |           |
| C      | 2.517357                | 1.384325  | -0.073111 |
| C      | 3.017151                | -1.337594 | 0.400809  |
| C      | 3.728733                | 0.756919  | -0.475372 |
| C      | 1.440373                | 0.569178  | 0.447916  |
| C      | 1.792827                | -0.768203 | 0.857167  |
| C      | 4.003584                | -0.611528 | -0.299213 |
| H      | 4.519209                | 1.385194  | -0.889843 |
| H      | 3.223441                | -2.370992 | 0.674111  |
| C      | 2.508011                | 2.892394  | -0.139137 |
| H      | 1.436991                | 3.213198  | 0.023075  |
| C      | 5.345738                | -1.183138 | -0.771233 |
| H      | 5.970917                | -0.307857 | -1.043988 |
| C      | 1.030872                | -1.555927 | 1.919368  |
| H      | 0.149062                | -0.966023 | 2.216379  |
| Si     | 0.307512                | -3.253780 | 1.403417  |
| Si     | 2.109917                | -1.682250 | 3.518231  |
| Si     | 6.448223                | -2.057805 | 0.529498  |
| Si     | 5.217968                | -2.113313 | -2.446400 |
| Si     | 3.365748                | 3.656140  | 1.404465  |
| Si     | 3.125476                | 3.686988  | -1.774922 |
| C      | 3.296636                | -3.155327 | 3.491353  |
| H      | 2.774840                | -4.123439 | 3.446026  |
| H      | 3.888801                | -3.146032 | 4.423781  |
| H      | 4.012257                | -3.120969 | 2.659584  |
| C      | 3.122658                | -0.117469 | 3.785278  |
| H      | 3.564070                | 0.276216  | 2.860584  |
| H      | 3.944012                | -0.317935 | 4.494597  |
| H      | 2.496547                | 0.672692  | 4.222846  |
| C      | 1.035781                | -1.867676 | 5.057509  |

|   |           |           |           |
|---|-----------|-----------|-----------|
| H | 0.346307  | -1.017797 | 5.161736  |
| H | 1.691338  | -1.871223 | 5.946314  |
| H | 0.444230  | -2.793058 | 5.076976  |
| C | -1.257796 | -2.947662 | 0.425446  |
| H | -2.088894 | -2.688024 | 1.096060  |
| H | -1.545961 | -3.855921 | -0.124351 |
| H | -1.157858 | -2.125744 | -0.290594 |
| C | -0.221342 | -4.304647 | 2.884440  |
| H | -0.723392 | -5.205331 | 2.487782  |
| H | -0.947449 | -3.783455 | 3.525888  |
| H | 0.612264  | -4.647138 | 3.515381  |
| C | 1.493254  | -4.326096 | 0.402938  |
| H | 2.429497  | -4.542630 | 0.941696  |
| H | 1.755677  | -3.886053 | -0.567905 |
| H | 1.001238  | -5.294706 | 0.203840  |
| C | 6.310192  | -1.148600 | 2.167970  |
| H | 5.288751  | -1.160247 | 2.565690  |
| H | 6.608171  | -0.093914 | 2.043970  |
| H | 6.977529  | -1.599198 | 2.922744  |
| C | 6.026309  | -3.888102 | 0.738183  |
| H | 6.562202  | -4.311943 | 1.605279  |
| H | 6.328317  | -4.468210 | -0.148998 |
| H | 4.952026  | -4.065966 | 0.895246  |
| C | 8.266303  | -1.939815 | 0.006453  |
| H | 8.912997  | -2.180164 | 0.869381  |
| H | 8.533392  | -0.920676 | -0.322249 |
| H | 8.535075  | -2.633448 | -0.803909 |
| C | 6.808672  | -3.021767 | -2.924809 |
| H | 7.677794  | -2.345778 | -2.973130 |
| H | 6.671136  | -3.445369 | -3.936257 |
| H | 7.065111  | -3.857197 | -2.255298 |
| C | 3.813596  | -3.359146 | -2.425325 |
| H | 3.768483  | -3.900882 | -3.385676 |
| H | 2.845026  | -2.861314 | -2.272815 |
| H | 3.942849  | -4.105212 | -1.625976 |

|   |           |           |           |
|---|-----------|-----------|-----------|
| C | 4.932880  | -0.837235 | -3.798000 |
| H | 4.770341  | -1.321933 | -4.775793 |
| H | 5.802561  | -0.165217 | -3.896868 |
| H | 4.051747  | -0.218421 | -3.586018 |
| C | 3.410197  | 5.539317  | 1.251714  |
| H | 3.734232  | 5.970615  | 2.215009  |
| H | 2.399553  | 5.927822  | 1.043105  |
| H | 4.088725  | 5.919883  | 0.473797  |
| C | 2.356819  | 3.287685  | 2.938695  |
| H | 1.497716  | 3.972083  | 3.008089  |
| H | 2.971328  | 3.402677  | 3.847787  |
| H | 1.961291  | 2.267942  | 2.922803  |
| C | 5.116193  | 2.990677  | 1.648084  |
| H | 5.111815  | 1.905444  | 1.830424  |
| H | 5.564879  | 3.474714  | 2.533789  |
| H | 5.778212  | 3.186290  | 0.791278  |
| C | 2.220305  | 5.313089  | -2.069832 |
| H | 2.434755  | 5.673160  | -3.091115 |
| H | 2.539926  | 6.096108  | -1.366655 |
| H | 1.129864  | 5.202014  | -1.977194 |
| C | 2.815875  | 2.538916  | -3.225258 |
| H | 3.570286  | 1.742067  | -3.273311 |
| H | 2.862854  | 3.095782  | -4.176669 |
| H | 1.833579  | 2.058469  | -3.157500 |
| C | 4.985785  | 4.060225  | -1.809207 |
| H | 5.604185  | 3.154493  | -1.699226 |
| H | 5.303921  | 4.778821  | -1.039454 |
| H | 5.233616  | 4.502374  | -2.791308 |
| C | -2.903587 | 0.564296  | 0.931719  |
| C | -2.991501 | -0.546415 | -1.651496 |
| C | -1.702978 | 0.617833  | 0.124722  |
| C | -4.021704 | -0.179462 | 0.451594  |
| C | -4.103138 | -0.774689 | -0.819049 |
| C | -1.842280 | 0.175912  | -1.241442 |
| H | -4.890586 | -0.257728 | 1.108013  |

|    |           |           |           |
|----|-----------|-----------|-----------|
| H  | -3.035569 | -0.905253 | -2.680457 |
| C  | -3.218403 | 1.273638  | 2.247767  |
| H  | -4.188566 | 0.828875  | 2.557120  |
| C  | -0.846306 | 0.560123  | -2.319047 |
| H  | 0.113822  | 0.817187  | -1.837679 |
| C  | -5.329969 | -1.555533 | -1.294338 |
| H  | -5.167699 | -1.797158 | -2.365264 |
| Si | -6.978657 | -0.575150 | -1.336837 |
| Si | -5.446514 | -3.289255 | -0.472317 |
| Si | -0.420199 | -0.782196 | -3.612338 |
| Si | -1.504215 | 2.212362  | -3.079830 |
| Si | -3.839512 | 3.080938  | 2.070155  |
| Si | -2.226662 | 0.760072  | 3.770817  |
| C  | -4.149953 | -4.372661 | -1.306109 |
| H  | -4.479275 | -4.654621 | -2.321407 |
| H  | -3.970478 | -5.304114 | -0.742297 |
| H  | -3.192720 | -3.840587 | -1.398428 |
| C  | -7.112837 | -4.146363 | -0.736704 |
| H  | -7.382526 | -4.231090 | -1.801547 |
| H  | -7.946591 | -3.651337 | -0.213916 |
| H  | -7.043326 | -5.173730 | -0.334893 |
| C  | -5.168014 | -3.192541 | 1.386314  |
| H  | -5.254484 | -4.199489 | 1.830485  |
| H  | -5.920633 | -2.549686 | 1.872198  |
| H  | -4.175465 | -2.792687 | 1.636066  |
| C  | -7.743847 | -0.346487 | 0.376213  |
| H  | -7.920149 | -1.307346 | 0.887514  |
| H  | -8.722074 | 0.157922  | 0.283271  |
| H  | -7.115283 | 0.276063  | 1.033114  |
| C  | -8.253766 | -1.453180 | -2.432490 |
| H  | -8.780643 | -2.270978 | -1.919317 |
| H  | -7.802930 | -1.868567 | -3.349869 |
| H  | -9.017200 | -0.720315 | -2.749704 |
| C  | -6.678999 | 1.106866  | -2.119155 |
| H  | -6.321495 | 0.998462  | -3.156554 |

|   |           |           |           |
|---|-----------|-----------|-----------|
| H | -5.930204 | 1.689847  | -1.567192 |
| H | -7.614715 | 1.692192  | -2.144684 |
| C | 1.250768  | -0.366437 | -4.359600 |
| H | 1.998680  | -0.256230 | -3.562514 |
| H | 1.250792  | 0.559456  | -4.951641 |
| H | 1.583844  | -1.189295 | -5.013750 |
| C | -0.233947 | -2.487657 | -2.837631 |
| H | 0.170571  | -3.185476 | -3.591299 |
| H | -1.184441 | -2.901012 | -2.473361 |
| H | 0.468015  | -2.466027 | -1.990922 |
| C | -1.670294 | -0.930131 | -5.025308 |
| H | -1.832766 | 0.023547  | -5.550683 |
| H | -2.655327 | -1.301978 | -4.701700 |
| H | -1.280104 | -1.651186 | -5.765401 |
| C | -1.317649 | 3.608411  | -1.839801 |
| H | -1.625682 | 4.569445  | -2.285457 |
| H | -0.280122 | 3.699604  | -1.496576 |
| H | -1.925580 | 3.440158  | -0.940469 |
| C | -0.607713 | 2.726431  | -4.657441 |
| H | -0.718703 | 1.990660  | -5.468298 |
| H | 0.463644  | 2.910612  | -4.506184 |
| H | -1.059938 | 3.672886  | -5.002327 |
| C | -3.329045 | 2.065305  | -3.515988 |
| H | -3.950149 | 1.931017  | -2.620780 |
| H | -3.540608 | 1.228050  | -4.198340 |
| H | -3.653789 | 2.995587  | -4.014655 |
| C | -4.672283 | 3.262780  | 0.388393  |
| H | -4.035408 | 2.910382  | -0.435262 |
| H | -4.931785 | 4.317681  | 0.192764  |
| H | -5.608587 | 2.681785  | 0.358252  |
| C | -5.192590 | 3.378289  | 3.366883  |
| H | -4.781368 | 3.543532  | 4.374761  |
| H | -5.915308 | 2.546721  | 3.432388  |
| H | -5.761682 | 4.285306  | 3.094675  |
| C | -2.555944 | 4.428036  | 2.314134  |



|   |           |           |          |
|---|-----------|-----------|----------|
| H | -3.068706 | 5.407256  | 2.304430 |
| H | -1.777140 | 4.428338  | 1.537156 |
| H | -2.054359 | 4.327886  | 3.290615 |
| C | -3.130051 | 1.364254  | 5.312371 |
| H | -3.033680 | 2.453647  | 5.444324 |
| H | -2.694492 | 0.881948  | 6.204413 |
| H | -4.204649 | 1.119309  | 5.289377 |
| C | -0.495276 | 1.458398  | 3.840753 |
| H | -0.538198 | 2.546115  | 3.685328 |
| H | 0.170092  | 1.066653  | 3.064314 |
| H | -0.035327 | 1.266110  | 4.822465 |
| C | -2.285445 | -1.122698 | 3.788547 |
| H | -3.333292 | -1.464456 | 3.733772 |
| H | -1.842143 | -1.542353 | 4.703736 |
| H | -1.762058 | -1.555132 | 2.926612 |
| N | -0.150986 | 2.558947  | 0.774632 |
| B | -0.160876 | 1.245836  | 0.527063 |

-----  
--  
-----  
--  
B=N-Tbt2  
-----  
--

| Atomic<br>Number | Coordinates (Angstroms) |           |           |
|------------------|-------------------------|-----------|-----------|
|                  | X                       | Y         | Z         |
| C                | 2.249670                | 1.267751  | -0.413957 |
| C                | 2.803916                | -1.272147 | 0.705880  |
| C                | 3.484347                | 0.610051  | -0.610412 |
| C                | 1.210796                | 0.532891  | 0.259291  |
| C                | 1.557006                | -0.659958 | 0.985120  |
| C                | 3.780093                | -0.674234 | -0.117722 |
| H                | 4.269988                | 1.148845  | -1.139716 |

|    |           |           |           |
|----|-----------|-----------|-----------|
| H  | 3.044708  | -2.199576 | 1.221098  |
| C  | 2.178597  | 2.738729  | -0.805894 |
| H  | 1.127654  | 3.075378  | -0.791473 |
| C  | 5.138131  | -1.289076 | -0.413586 |
| H  | 5.719918  | -0.503222 | -0.937093 |
| C  | 0.767367  | -1.148559 | 2.192622  |
| H  | -0.111423 | -0.494715 | 2.315832  |
| Si | 0.037876  | -2.915269 | 2.126954  |
| Si | 1.819903  | -0.886798 | 3.792638  |
| Si | 6.256302  | -1.692324 | 1.081165  |
| Si | 5.048274  | -2.657117 | -1.742452 |
| Si | 3.079836  | 3.872737  | 0.493006  |
| Si | 2.821797  | 3.178150  | -2.563627 |
| C  | 3.025984  | -2.307813 | 4.106906  |
| H  | 2.508977  | -3.259781 | 4.305061  |
| H  | 3.620735  | -2.065535 | 5.005166  |
| H  | 3.735924  | -2.474122 | 3.286448  |
| C  | 2.803027  | 0.716745  | 3.703198  |
| H  | 3.203525  | 0.928101  | 2.703110  |
| H  | 3.650538  | 0.674778  | 4.408412  |
| H  | 2.177789  | 1.568459  | 4.004061  |
| C  | 0.749235  | -0.771385 | 5.342826  |
| H  | -0.112421 | -0.105496 | 5.214208  |
| H  | 1.370467  | -0.350078 | 6.153002  |
| H  | 0.379722  | -1.748429 | 5.682415  |
| C  | -1.451109 | -2.898542 | 1.006927  |
| H  | -2.204938 | -2.183066 | 1.362318  |
| H  | -1.916649 | -3.895209 | 0.973591  |
| H  | -1.197800 | -2.595701 | -0.013860 |
| C  | -0.591332 | -3.494951 | 3.812509  |
| H  | -1.149994 | -4.434239 | 3.652328  |
| H  | -1.285169 | -2.777959 | 4.275609  |
| H  | 0.211084  | -3.711625 | 4.533731  |
| C  | 1.259182  | -4.216672 | 1.524902  |
| H  | 2.192090  | -4.241615 | 2.107847  |

|   |          |           |           |
|---|----------|-----------|-----------|
| H | 1.519702 | -4.077634 | 0.467700  |
| H | 0.787154 | -5.210582 | 1.618293  |
| C | 5.980488 | -0.444911 | 2.457226  |
| H | 4.964763 | -0.498647 | 2.864994  |
| H | 6.143250 | 0.584285  | 2.098100  |
| H | 6.688982 | -0.628283 | 3.283627  |
| C | 5.991939 | -3.440157 | 1.746408  |
| H | 6.497380 | -3.557058 | 2.720435  |
| H | 6.411492 | -4.197767 | 1.064392  |
| H | 4.928761 | -3.682631 | 1.894325  |
| C | 8.059715 | -1.524498 | 0.542685  |
| H | 8.713870 | -1.519996 | 1.432089  |
| H | 8.230736 | -0.575633 | 0.005344  |
| H | 8.394144 | -2.343969 | -0.110374 |
| C | 6.775123 | -3.245040 | -2.228280 |
| H | 7.452725 | -2.406842 | -2.459185 |
| H | 6.700857 | -3.871665 | -3.134404 |
| H | 7.248546 | -3.858210 | -1.444785 |
| C | 4.054286 | -4.156678 | -1.199858 |
| H | 3.953785 | -4.858612 | -2.046141 |
| H | 3.041437 | -3.878431 | -0.882972 |
| H | 4.532932 | -4.698922 | -0.370881 |
| C | 4.244839 | -1.878476 | -3.250022 |
| H | 4.103019 | -2.608699 | -4.063586 |
| H | 4.858313 | -1.050765 | -3.644928 |
| H | 3.259484 | -1.468800 | -2.990058 |
| C | 3.112721 | 5.656206  | -0.138778 |
| H | 3.467175 | 6.297600  | 0.687261  |
| H | 2.099202 | 6.000388  | -0.402599 |
| H | 3.768583 | 5.836457  | -1.002189 |
| C | 2.303603 | 4.030307  | 2.196789  |
| H | 1.368003 | 4.604779  | 2.172069  |
| H | 3.031566 | 4.562389  | 2.838912  |
| H | 2.071706 | 3.065536  | 2.655852  |
| C | 4.838123 | 3.257973  | 0.801028  |

|    |           |           |           |
|----|-----------|-----------|-----------|
| H  | 4.819527  | 2.263427  | 1.272050  |
| H  | 5.332510  | 3.948417  | 1.506566  |
| H  | 5.462791  | 3.192992  | -0.100570 |
| C  | 1.978107  | 4.767198  | -3.159546 |
| H  | 1.780196  | 4.708174  | -4.243535 |
| H  | 2.617642  | 5.646878  | -2.990018 |
| H  | 1.017620  | 4.956423  | -2.657364 |
| C  | 2.476975  | 1.774940  | -3.764664 |
| H  | 3.096088  | 0.897371  | -3.527852 |
| H  | 2.718443  | 2.090948  | -4.794248 |
| H  | 1.428984  | 1.457688  | -3.750453 |
| C  | 4.686992  | 3.479002  | -2.700122 |
| H  | 5.289135  | 2.598561  | -2.423943 |
| H  | 5.036222  | 4.329778  | -2.096559 |
| H  | 4.915746  | 3.710091  | -3.755974 |
| C  | -2.578082 | 0.786786  | 0.760674  |
| C  | -2.771441 | -0.926039 | -1.448932 |
| C  | -1.407980 | 0.520047  | -0.034897 |
| C  | -3.746374 | 0.037611  | 0.491903  |
| C  | -3.876695 | -0.847201 | -0.590667 |
| C  | -1.559046 | -0.228541 | -1.248543 |
| H  | -4.610600 | 0.216223  | 1.133576  |
| H  | -2.886797 | -1.486844 | -2.372560 |
| C  | -2.795555 | 1.940652  | 1.756145  |
| H  | -3.890812 | 1.853122  | 1.935873  |
| C  | -0.630232 | -0.138283 | -2.460480 |
| H  | 0.331260  | 0.311393  | -2.161840 |
| C  | -5.170297 | -1.575916 | -0.925121 |
| H  | -5.143763 | -1.773135 | -2.016138 |
| Si | -6.780887 | -0.576885 | -0.695918 |
| Si | -5.214308 | -3.338147 | -0.188274 |
| Si | -0.153044 | -1.785157 | -3.317565 |
| Si | -1.458860 | 1.139499  | -3.659485 |
| Si | -2.933014 | 3.708732  | 0.977075  |
| Si | -2.358343 | 1.737220  | 3.614169  |

|   |           |           |           |
|---|-----------|-----------|-----------|
| C | -3.886846 | -4.360438 | -1.055339 |
| H | -4.192302 | -4.562544 | -2.096844 |
| H | -3.741545 | -5.334860 | -0.557893 |
| H | -2.917144 | -3.846043 | -1.081152 |
| C | -6.853226 | -4.201514 | -0.560753 |
| H | -7.075508 | -4.200347 | -1.640722 |
| H | -7.709308 | -3.747334 | -0.037708 |
| H | -6.791126 | -5.256209 | -0.239096 |
| C | -4.981755 | -3.298372 | 1.681111  |
| H | -4.718402 | -4.300077 | 2.062015  |
| H | -5.911462 | -2.986754 | 2.183070  |
| H | -4.186111 | -2.604617 | 1.986872  |
| C | -7.500473 | -0.720075 | 1.046866  |
| H | -7.852228 | -1.739154 | 1.274261  |
| H | -8.365900 | -0.042131 | 1.148760  |
| H | -6.769771 | -0.440569 | 1.823615  |
| C | -8.055188 | -1.197946 | -1.943659 |
| H | -8.442728 | -2.198270 | -1.700650 |
| H | -7.626556 | -1.241205 | -2.959864 |
| H | -8.914336 | -0.505663 | -1.978231 |
| C | -6.510930 | 1.253083  | -1.046794 |
| H | -5.994533 | 1.417712  | -2.005534 |
| H | -5.912267 | 1.735543  | -0.261977 |
| H | -7.485208 | 1.770094  | -1.093631 |
| C | 1.077263  | -1.508542 | -4.726505 |
| H | 1.810619  | -0.714452 | -4.541802 |
| H | 0.561674  | -1.276522 | -5.669309 |
| H | 1.638360  | -2.445329 | -4.881427 |
| C | 0.645935  | -2.942923 | -2.069639 |
| H | 1.255156  | -3.697765 | -2.593367 |
| H | -0.100498 | -3.480744 | -1.468705 |
| H | 1.302602  | -2.393815 | -1.378311 |
| C | -1.598922 | -2.688853 | -4.141576 |
| H | -2.199822 | -2.018622 | -4.778217 |
| H | -2.274383 | -3.185304 | -3.429370 |

|   |           |           |           |
|---|-----------|-----------|-----------|
| H | -1.185353 | -3.474092 | -4.799150 |
| C | -1.063896 | 2.874020  | -3.040069 |
| H | -1.861283 | 3.581287  | -3.319130 |
| H | -0.132355 | 3.230748  | -3.497757 |
| H | -0.945339 | 2.914454  | -1.948359 |
| C | -0.871790 | 1.047325  | -5.455227 |
| H | -1.223597 | 0.135503  | -5.963754 |
| H | 0.218616  | 1.104793  | -5.574565 |
| H | -1.312008 | 1.908181  | -5.990115 |
| C | -3.330538 | 0.930656  | -3.776736 |
| H | -3.841848 | 1.101485  | -2.820912 |
| H | -3.617282 | -0.071144 | -4.134902 |
| H | -3.712577 | 1.665603  | -4.507762 |
| C | -3.587389 | 3.501254  | -0.778946 |
| H | -3.169421 | 2.621565  | -1.282223 |
| H | -3.344508 | 4.389276  | -1.385188 |
| H | -4.681419 | 3.390246  | -0.775395 |
| C | -4.282482 | 4.638608  | 1.928380  |
| H | -3.928263 | 5.053423  | 2.884345  |
| H | -5.167926 | 4.015654  | 2.136377  |
| H | -4.613681 | 5.488496  | 1.305623  |
| C | -1.476836 | 4.906879  | 0.934432  |
| H | -1.881455 | 5.897391  | 0.649319  |
| H | -0.700166 | 4.628611  | 0.208758  |
| H | -0.988899 | 5.001323  | 1.915682  |
| C | -3.664842 | 2.677308  | 4.611309  |
| H | -3.478496 | 3.762736  | 4.619600  |
| H | -3.622724 | 2.332883  | 5.659587  |
| H | -4.692504 | 2.514954  | 4.247059  |
| C | -0.719748 | 2.365543  | 4.282473  |
| H | -0.574742 | 3.423687  | 4.015379  |
| H | 0.142324  | 1.822307  | 3.882925  |
| H | -0.718493 | 2.280206  | 5.385006  |
| C | -2.625642 | -0.093416 | 3.983691  |
| H | -3.655688 | -0.385913 | 3.717221  |

|   |           |           |          |
|---|-----------|-----------|----------|
| H | -2.483261 | -0.313437 | 5.054764 |
| H | -1.948186 | -0.739014 | 3.409329 |
| B | -0.042187 | 2.203104  | 1.252535 |
| N | -0.146945 | 1.116548  | 0.379333 |

-----  
--  
-----  
--  
Ar\*-B≡N-Ar\*  
-----

-----  
--  
Atomic Coordinates (Angstroms)  
Number X Y Z  
-----

|   |           |           |           |
|---|-----------|-----------|-----------|
| C | -3.083029 | 2.724802  | 0.191433  |
| C | -4.583929 | 0.919161  | 1.712028  |
| C | -2.451970 | 1.978337  | 1.229352  |
| C | -4.461861 | 2.568139  | -0.029564 |
| C | -5.239919 | 1.692126  | 0.739451  |
| C | -3.209539 | 1.051824  | 1.992266  |
| H | -4.940041 | 3.173391  | -0.800662 |
| H | -5.167575 | 0.210514  | 2.309041  |
| C | -2.334733 | 3.795484  | -0.605017 |
| H | -1.259041 | 3.616230  | -0.486545 |
| C | -2.631351 | 5.199832  | -0.034701 |
| H | -2.055008 | 5.967714  | -0.577411 |
| H | -3.703247 | 5.438411  | -0.135839 |
| H | -2.368551 | 5.262184  | 1.030846  |
| C | -2.647011 | 3.766514  | -2.113220 |
| H | -3.681087 | 4.085753  | -2.320908 |
| H | -2.509680 | 2.763858  | -2.536865 |
| H | -1.978643 | 4.461707  | -2.647033 |
| C | -2.690235 | 0.273452  | 3.205381  |
| H | -3.401009 | -0.562034 | 3.332898  |

|   |           |           |           |
|---|-----------|-----------|-----------|
| C | -2.789879 | 1.141528  | 4.481632  |
| H | -3.795595 | 1.578578  | 4.587824  |
| H | -2.058496 | 1.963864  | 4.451248  |
| H | -2.576254 | 0.534025  | 5.377467  |
| C | -1.289435 | -0.346647 | 3.090886  |
| H | -1.163289 | -0.902960 | 2.153341  |
| H | -1.126789 | -1.044006 | 3.928273  |
| H | -0.499913 | 0.413489  | 3.143187  |
| C | -6.759532 | 1.656582  | 0.634267  |
| H | -7.078331 | 0.623010  | 0.838616  |
| C | -7.370201 | 2.549053  | 1.740510  |
| H | -7.067206 | 3.600024  | 1.596450  |
| H | -7.025058 | 2.233152  | 2.737578  |
| H | -8.472401 | 2.501448  | 1.720385  |
| C | -7.308924 | 2.065224  | -0.743116 |
| H | -7.160613 | 3.141455  | -0.932310 |
| H | -8.392792 | 1.871547  | -0.793004 |
| H | -6.820671 | 1.510516  | -1.559160 |
| C | 4.982624  | 2.170898  | -1.264993 |
| C | 2.547864  | 2.235974  | 0.203118  |
| C | 4.903913  | 1.654052  | 0.037064  |
| C | 3.801390  | 2.663965  | -1.845137 |
| C | 2.584441  | 2.705655  | -1.143741 |
| C | 3.710346  | 1.671357  | 0.786403  |
| H | 5.794210  | 1.229514  | 0.505455  |
| H | 3.841455  | 3.043605  | -2.868863 |
| C | 6.307819  | 2.284792  | -2.011799 |
| H | 6.067239  | 2.528830  | -3.062326 |
| C | 7.143759  | 0.991260  | -2.010988 |
| H | 6.589936  | 0.149808  | -2.453848 |
| H | 7.438244  | 0.705354  | -0.988238 |
| H | 8.070406  | 1.134930  | -2.591008 |
| C | 7.127649  | 3.460846  | -1.433962 |
| H | 6.545273  | 4.395852  | -1.459026 |
| H | 8.058471  | 3.612041  | -2.006668 |



|   |           |           |           |
|---|-----------|-----------|-----------|
| H | 7.399830  | 3.261888  | -0.383680 |
| C | 3.804430  | 1.087832  | 2.199379  |
| H | 4.525598  | 0.263028  | 2.098976  |
| C | 2.533165  | 0.455180  | 2.784997  |
| H | 2.034446  | -0.191095 | 2.051863  |
| H | 1.815997  | 1.206513  | 3.139928  |
| H | 2.814184  | -0.171232 | 3.646769  |
| C | 4.417571  | 2.104265  | 3.187638  |
| H | 5.355371  | 2.528716  | 2.795222  |
| H | 4.635794  | 1.615750  | 4.152563  |
| H | 3.721375  | 2.934850  | 3.382144  |
| C | 1.354581  | 3.341624  | -1.795241 |
| H | 0.468577  | 2.873292  | -1.345834 |
| C | 1.294974  | 4.851907  | -1.478674 |
| H | 1.277336  | 5.035222  | -0.394962 |
| H | 0.391223  | 5.304420  | -1.919422 |
| H | 2.175688  | 5.365480  | -1.899475 |
| C | 1.257795  | 3.113822  | -3.313807 |
| H | 1.332200  | 2.048198  | -3.569334 |
| H | 2.044738  | 3.656632  | -3.862402 |
| H | 0.288106  | 3.486558  | -3.679912 |
| C | 1.341664  | 2.558067  | 1.030846  |
| C | -0.905220 | 3.472357  | 2.459169  |
| C | 0.100515  | 1.869800  | 0.911145  |
| C | 1.440474  | 3.667841  | 1.891179  |
| C | 0.337824  | 4.095781  | 2.642603  |
| C | -1.050747 | 2.390234  | 1.571945  |
| H | 2.393516  | 4.196648  | 1.955436  |
| H | 0.432282  | 4.944059  | 3.326439  |
| H | -1.793298 | 3.853482  | 2.967846  |
| C | -3.097645 | -2.681156 | -0.171061 |
| C | -4.609959 | -0.922546 | -1.731014 |
| C | -2.463978 | -1.940852 | -1.210483 |
| C | -4.482550 | -2.549798 | 0.029060  |
| C | -5.268068 | -1.703915 | -0.766222 |

|   |           |           |           |
|---|-----------|-----------|-----------|
| C | -3.226832 | -1.025867 | -1.981726 |
| H | -4.957892 | -3.156943 | 0.800648  |
| H | -5.197266 | -0.231529 | -2.345256 |
| C | -2.336772 | -3.719755 | 0.654041  |
| H | -1.264769 | -3.514625 | 0.545362  |
| C | -2.590373 | -5.140894 | 0.105534  |
| H | -2.004671 | -5.885541 | 0.670397  |
| H | -3.657888 | -5.404332 | 0.193477  |
| H | -2.306971 | -5.214500 | -0.954108 |
| C | -2.669554 | -3.666862 | 2.156784  |
| H | -3.703402 | -3.991791 | 2.357860  |
| H | -2.547064 | -2.654146 | 2.561335  |
| H | -2.000934 | -4.343632 | 2.713518  |
| C | -2.690722 | -0.221721 | -3.169866 |
| H | -3.416740 | 0.598984  | -3.311387 |
| C | -2.718463 | -1.069774 | -4.462854 |
| H | -3.706398 | -1.534658 | -4.610673 |
| H | -1.963730 | -1.869600 | -4.420101 |
| H | -2.494151 | -0.439890 | -5.340627 |
| C | -1.310721 | 0.425753  | -2.987727 |
| H | -1.246023 | 0.974496  | -2.039282 |
| H | -1.121107 | 1.133511  | -3.810270 |
| H | -0.505476 | -0.318455 | -3.001093 |
| C | -6.790620 | -1.713876 | -0.697738 |
| H | -7.139433 | -0.696258 | -0.934020 |
| C | -7.347375 | -2.650931 | -1.795321 |
| H | -7.016127 | -3.687838 | -1.617632 |
| H | -6.987820 | -2.348844 | -2.791503 |
| H | -8.450901 | -2.636853 | -1.802491 |
| C | -7.360175 | -2.110467 | 0.675435  |
| H | -7.185167 | -3.177788 | 0.889339  |
| H | -8.450082 | -1.947693 | 0.699033  |
| H | -6.907176 | -1.527335 | 1.492328  |
| C | 4.987730  | -2.185575 | 1.251281  |
| C | 2.544261  | -2.246526 | -0.205981 |

|   |          |           |           |
|---|----------|-----------|-----------|
| C | 4.902546 | -1.667576 | -0.049587 |
| C | 3.808546 | -2.678788 | 1.836995  |
| C | 2.589388 | -2.716232 | 1.139547  |
| C | 3.703332 | -1.680979 | -0.792028 |
| H | 5.792762 | -1.245737 | -0.521116 |
| H | 3.853275 | -3.059935 | 2.860397  |
| C | 6.318274 | -2.304027 | 1.988610  |
| H | 6.086090 | -2.567988 | 3.035956  |
| C | 7.145400 | -1.004845 | 2.006122  |
| H | 6.593313 | -0.177548 | 2.476976  |
| H | 7.421454 | -0.692923 | 0.986186  |
| H | 8.082173 | -1.153856 | 2.568481  |
| C | 7.144204 | -3.462119 | 1.385074  |
| H | 6.565115 | -4.399205 | 1.385170  |
| H | 8.074882 | -3.623430 | 1.955448  |
| H | 7.417239 | -3.235608 | 0.340813  |
| C | 3.789884 | -1.099196 | -2.206309 |
| H | 4.501903 | -0.265527 | -2.109879 |
| C | 2.510261 | -0.486180 | -2.796015 |
| H | 1.992090 | 0.142789  | -2.061659 |
| H | 1.811471 | -1.250680 | -3.158966 |
| H | 2.784384 | 0.151072  | -3.652485 |
| C | 4.411540 | -2.114854 | -3.190010 |
| H | 5.353926 | -2.527974 | -2.796498 |
| H | 4.622528 | -1.632028 | -4.159655 |
| H | 3.722318 | -2.953303 | -3.375104 |
| C | 1.354978 | -3.339911 | 1.791108  |
| H | 0.477008 | -2.863195 | 1.336546  |
| C | 1.282341 | -4.850843 | 1.481710  |
| H | 1.273440 | -5.037302 | 0.398613  |
| H | 0.368964 | -5.291013 | 1.915037  |
| H | 2.152362 | -5.372900 | 1.914354  |
| C | 1.252575 | -3.104082 | 3.308055  |
| H | 1.335092 | -2.038114 | 3.560401  |
| H | 2.030799 | -3.652815 | 3.863194  |

|   |           |           |           |
|---|-----------|-----------|-----------|
| H | 0.277239  | -3.465016 | 3.671372  |
| C | 1.330837  | -2.555936 | -1.026503 |
| C | -0.930291 | -3.441763 | -2.444227 |
| C | 0.100093  | -1.844810 | -0.911898 |
| C | 1.407596  | -3.664044 | -1.888941 |
| C | 0.301267  | -4.083568 | -2.639717 |
| C | -1.064758 | -2.357294 | -1.557977 |
| H | 2.355719  | -4.202180 | -1.955649 |
| H | 0.382502  | -4.932435 | -3.323664 |
| H | -1.827968 | -3.809085 | -2.947022 |
| B | 0.061124  | 0.515132  | 0.212805  |
| N | 0.048529  | -0.686479 | -0.188636 |

-----  
--

-----  
--

Ar\*2-B=N

-----  
--

| Atomic<br>Number | Coordinates (Angstroms) |   |   |
|------------------|-------------------------|---|---|
|                  | X                       | Y | Z |

-----  
--

|   |           |           |           |
|---|-----------|-----------|-----------|
| B | -1.541712 | 0.439886  | -0.074817 |
| N | -2.021165 | 0.390969  | 1.226937  |
| C | -2.431594 | 0.845175  | -1.358928 |
| C | -3.972094 | 1.510187  | -3.669563 |
| C | -3.201425 | -0.141011 | -2.035542 |
| C | -2.416357 | 2.167362  | -1.892565 |
| C | -3.192627 | 2.480443  | -3.027956 |
| C | -3.960072 | 0.200104  | -3.176420 |
| H | -3.179096 | 3.505981  | -3.402312 |
| H | -4.553308 | -0.578046 | -3.662844 |
| H | -4.575637 | 1.771568  | -4.543473 |
| C | -0.029572 | 0.062459  | -0.248000 |

|   |           |           |           |
|---|-----------|-----------|-----------|
| C | 2.700960  | -0.643401 | -0.156182 |
| C | 0.709811  | -0.047674 | -1.430806 |
| C | 0.594666  | -0.229482 | 0.992881  |
| C | 1.953520  | -0.562223 | 1.038288  |
| C | 2.062676  | -0.408086 | -1.387537 |
| H | 0.225286  | 0.142107  | -2.387746 |
| H | 2.450411  | -0.768388 | 1.988948  |
| H | 2.641909  | -0.493853 | -2.309752 |
| C | -3.283066 | -1.578592 | -1.609147 |
| C | -3.708797 | -4.331129 | -1.044723 |
| C | -4.236554 | -1.964588 | -0.632806 |
| C | -2.531569 | -2.571685 | -2.295798 |
| C | -2.759490 | -3.927318 | -1.999709 |
| C | -4.426168 | -3.333948 | -0.365997 |
| H | -2.187013 | -4.686925 | -2.537905 |
| H | -5.174559 | -3.635811 | 0.372983  |
| C | -1.547299 | 3.267763  | -1.350250 |
| C | 0.155550  | 5.354065  | -0.407986 |
| C | -0.299784 | 3.534833  | -1.993167 |
| C | -1.981638 | 4.117694  | -0.295256 |
| C | -1.113955 | 5.138374  | 0.145627  |
| C | 0.532403  | 4.553561  | -1.496525 |
| H | -1.448941 | 5.788349  | 0.960335  |
| H | 1.490500  | 4.736188  | -1.987527 |
| C | -0.294108 | -0.164933 | 2.195754  |
| C | -1.485148 | -0.102749 | 4.796087  |
| C | -0.800284 | -1.386751 | 2.809919  |
| C | -0.301299 | 1.059118  | 2.989863  |
| C | -0.915727 | 1.058873  | 4.244776  |
| C | -1.418418 | -1.304672 | 4.060928  |
| H | -0.943614 | 1.977626  | 4.832933  |
| H | -1.828279 | -2.220889 | 4.494599  |
| C | 4.156263  | -0.966136 | -0.133256 |
| C | 6.918436  | -1.565048 | -0.238310 |
| C | 5.104072  | 0.083507  | -0.045379 |

|   |           |           |           |
|---|-----------|-----------|-----------|
| C | 4.579033  | -2.314809 | -0.255753 |
| C | 5.956233  | -2.590062 | -0.311089 |
| C | 6.473723  | -0.239956 | -0.099085 |
| H | 6.285520  | -3.626759 | -0.420363 |
| H | 7.218604  | 0.559947  | -0.040386 |
| C | -5.121655 | -0.932971 | 0.058319  |
| H | -4.713409 | 0.058781  | -0.174485 |
| C | -1.521448 | -2.211041 | -3.384495 |
| H | -1.358176 | -1.124373 | -3.339028 |
| C | -5.115226 | -1.078614 | 1.590444  |
| H | -5.705648 | -0.267195 | 2.047973  |
| H | -4.086455 | -1.012013 | 1.973492  |
| H | -5.559929 | -2.035954 | 1.910118  |
| C | -6.553461 | -0.988317 | -0.516652 |
| H | -7.184573 | -0.203748 | -0.065771 |
| H | -7.024961 | -1.964597 | -0.312847 |
| H | -6.545347 | -0.839815 | -1.608538 |
| C | -0.158612 | -2.902236 | -3.181843 |
| H | 0.233118  | -2.728881 | -2.171086 |
| H | 0.578218  | -2.513606 | -3.904470 |
| H | -0.229414 | -3.990873 | -3.340539 |
| C | -2.084951 | -2.535409 | -4.785249 |
| H | -3.032022 | -2.005247 | -4.965978 |
| H | -2.277836 | -3.616486 | -4.887606 |
| H | -1.368790 | -2.241757 | -5.571618 |
| C | -3.965229 | -5.804888 | -0.754543 |
| H | -4.795758 | -5.850972 | -0.027634 |
| C | -4.409483 | -6.567462 | -2.019415 |
| H | -5.287896 | -6.087947 | -2.480341 |
| H | -4.670222 | -7.611082 | -1.774795 |
| H | -3.605309 | -6.590893 | -2.773231 |
| C | -2.736956 | -6.473504 | -0.104202 |
| H | -2.451383 | -5.951750 | 0.823165  |
| H | -1.869810 | -6.449705 | -0.784734 |
| H | -2.946982 | -7.528648 | 0.140041  |

|   |           |           |           |
|---|-----------|-----------|-----------|
| C | 0.124387  | 2.838375  | -3.288822 |
| H | -0.430486 | 1.892527  | -3.368236 |
| C | -3.386753 | 4.130269  | 0.323078  |
| H | -3.314682 | 4.848834  | 1.158879  |
| C | -0.263402 | 3.705649  | -4.510232 |
| H | -1.342730 | 3.909269  | -4.541068 |
| H | 0.019665  | 3.198833  | -5.448657 |
| H | 0.263631  | 4.673898  | -4.473290 |
| C | 1.633873  | 2.527887  | -3.355186 |
| H | 2.222793  | 3.436317  | -3.562062 |
| H | 1.839944  | 1.818977  | -4.174299 |
| H | 2.001449  | 2.091386  | -2.418632 |
| C | -4.422894 | 4.713687  | -0.665197 |
| H | -5.367648 | 4.924583  | -0.135766 |
| H | -4.643240 | 3.996691  | -1.469644 |
| H | -4.061628 | 5.649228  | -1.122472 |
| C | -3.911753 | 2.815564  | 0.923801  |
| H | -4.810218 | 3.023253  | 1.529736  |
| H | -3.166219 | 2.313198  | 1.555963  |
| H | -4.198902 | 2.104401  | 0.138715  |
| C | 1.066759  | 6.451989  | 0.124624  |
| H | 0.604091  | 6.836959  | 1.051188  |
| C | 1.164359  | 7.625552  | -0.873139 |
| H | 0.164192  | 8.020776  | -1.112283 |
| H | 1.630775  | 7.297612  | -1.817051 |
| H | 1.775001  | 8.445811  | -0.458719 |
| C | 2.467227  | 5.914687  | 0.483101  |
| H | 2.401407  | 5.061276  | 1.175890  |
| H | 3.078385  | 6.701351  | 0.956427  |
| H | 3.003924  | 5.572714  | -0.416781 |
| C | 3.560359  | -3.448322 | -0.365566 |
| H | 2.570999  | -3.028608 | -0.133475 |
| C | 3.825596  | -4.577063 | 0.648654  |
| H | 3.875484  | -4.180886 | 1.675248  |
| H | 4.774613  | -5.097748 | 0.441232  |

|   |           |           |           |
|---|-----------|-----------|-----------|
| H | 3.017678  | -5.326300 | 0.607117  |
| C | 3.495992  | -3.992801 | -1.807594 |
| H | 3.260056  | -3.187176 | -2.520060 |
| H | 2.717878  | -4.769306 | -1.897097 |
| H | 4.460589  | -4.437244 | -2.105050 |
| C | 4.667126  | 1.543634  | 0.071227  |
| H | 3.573455  | 1.557656  | 0.187962  |
| C | 4.999728  | 2.327311  | -1.215315 |
| H | 4.613316  | 3.358290  | -1.151755 |
| H | 4.549828  | 1.845195  | -2.096651 |
| H | 6.089155  | 2.381026  | -1.377580 |
| C | 5.270651  | 2.231416  | 1.311421  |
| H | 4.879196  | 3.257555  | 1.409640  |
| H | 6.368844  | 2.297928  | 1.243654  |
| H | 5.022587  | 1.677912  | 2.230642  |
| C | 8.407121  | -1.877467 | -0.310671 |
| H | 8.944308  | -0.916597 | -0.221158 |
| C | 8.852051  | -2.776825 | 0.860820  |
| H | 8.580377  | -2.325648 | 1.828636  |
| H | 9.943599  | -2.933684 | 0.842176  |
| H | 8.368876  | -3.766233 | 0.803816  |
| C | 8.785395  | -2.502253 | -1.669382 |
| H | 8.473068  | -1.851845 | -2.502134 |
| H | 8.294618  | -3.480141 | -1.804449 |
| H | 9.874960  | -2.659356 | -1.738515 |
| C | -0.639983 | -2.793412 | 2.242287  |
| H | -1.454648 | -3.376288 | 2.706942  |
| C | -0.778989 | -2.967684 | 0.725203  |
| H | -1.647115 | -2.423070 | 0.341181  |
| H | -0.915795 | -4.034500 | 0.497882  |
| H | 0.111811  | -2.622597 | 0.188763  |
| C | 0.688238  | -3.409643 | 2.751664  |
| H | 1.553264  | -2.896408 | 2.308961  |
| H | 0.740120  | -4.471003 | 2.458463  |
| H | 0.769746  | -3.346288 | 3.848626  |



|   |           |           |          |
|---|-----------|-----------|----------|
| C | 0.404882  | 2.312483  | 2.504851 |
| H | 0.433384  | 2.282735  | 1.405155 |
| C | 1.860759  | 2.313084  | 3.037270 |
| H | 1.864011  | 2.348479  | 4.139638 |
| H | 2.396381  | 3.200733  | 2.666038 |
| H | 2.417892  | 1.422248  | 2.720342 |
| C | -0.295931 | 3.609609  | 2.941677 |
| H | -1.357629 | 3.605849  | 2.661960 |
| H | 0.184664  | 4.466571  | 2.451555 |
| H | -0.217032 | 3.767188  | 4.029961 |
| C | -2.131963 | -0.054679 | 6.170965 |
| H | -2.068384 | 0.989718  | 6.522609 |
| C | -1.377109 | -0.937275 | 7.189436 |
| H | -1.827075 | -0.828861 | 8.190450 |
| H | -0.315062 | -0.651867 | 7.255274 |
| H | -1.426996 | -2.002535 | 6.912014 |
| C | -3.625332 | -0.438619 | 6.097566 |
| H | -4.098950 | -0.312725 | 7.085329 |
| H | -3.750189 | -1.490304 | 5.794161 |
| H | -4.159919 | 0.189838  | 5.368862 |

-----  
--  
-----  
--  
B=N-Ar\*2

-----  
--

| Atomic<br>Number | Coordinates (Angstroms) |          |           |
|------------------|-------------------------|----------|-----------|
|                  | X                       | Y        | Z         |
| C                | 3.021774                | 2.304169 | -0.334162 |
| C                | 4.698095                | 0.621681 | -1.816653 |
| C                | 2.450396                | 1.307449 | -1.185493 |
| C                | 4.419809                | 2.427982 | -0.267074 |

-----  
--

|   |           |           |           |
|---|-----------|-----------|-----------|
| C | 5.280482  | 1.611717  | -1.016586 |
| C | 3.303683  | 0.465913  | -1.940195 |
| H | 4.844001  | 3.207883  | 0.365438  |
| H | 5.347725  | -0.038021 | -2.400662 |
| C | 2.168944  | 3.338349  | 0.403402  |
| H | 1.213232  | 2.856877  | 0.671055  |
| C | 1.861710  | 4.558313  | -0.495130 |
| H | 1.272263  | 5.303867  | 0.063759  |
| H | 2.803294  | 5.037203  | -0.814913 |
| H | 1.296657  | 4.280516  | -1.392899 |
| C | 2.790239  | 3.842699  | 1.720058  |
| H | 3.616929  | 4.548217  | 1.532432  |
| H | 3.174863  | 3.022421  | 2.338942  |
| H | 2.026794  | 4.381586  | 2.303044  |
| C | 2.853450  | -0.561457 | -2.982639 |
| H | 3.545762  | -1.409851 | -2.843701 |
| C | 3.096151  | -0.037367 | -4.418302 |
| H | 4.124286  | 0.336426  | -4.541217 |
| H | 2.403343  | 0.783349  | -4.659442 |
| H | 2.929978  | -0.843453 | -5.153136 |
| C | 1.428565  | -1.117907 | -2.863753 |
| H | 1.182016  | -1.386050 | -1.828699 |
| H | 1.338975  | -2.023494 | -3.481783 |
| H | 0.673890  | -0.407084 | -3.219612 |
| C | 6.787084  | 1.837529  | -1.062278 |
| H | 7.258630  | 0.857563  | -1.247248 |
| C | 7.135685  | 2.750058  | -2.261304 |
| H | 6.675425  | 3.743948  | -2.131113 |
| H | 6.756224  | 2.325420  | -3.204172 |
| H | 8.227197  | 2.884589  | -2.352368 |
| C | 7.379076  | 2.411660  | 0.236083  |
| H | 7.057285  | 3.453293  | 0.398432  |
| H | 8.480248  | 2.414539  | 0.184864  |
| H | 7.075052  | 1.824784  | 1.116140  |
| C | -5.217475 | 2.253477  | 0.844089  |

|   |           |           |           |
|---|-----------|-----------|-----------|
| C | -2.692356 | 1.871303  | -0.436281 |
| C | -5.085915 | 1.430992  | -0.281420 |
| C | -4.073886 | 2.941168  | 1.275944  |
| C | -2.825694 | 2.799722  | 0.645068  |
| C | -3.860694 | 1.251585  | -0.958533 |
| H | -5.966865 | 0.922176  | -0.678499 |
| H | -4.169850 | 3.647731  | 2.104220  |
| C | -6.568270 | 2.530062  | 1.495835  |
| H | -6.365057 | 2.979625  | 2.484288  |
| C | -7.420204 | 1.267373  | 1.719083  |
| H | -6.887018 | 0.522076  | 2.329687  |
| H | -7.690803 | 0.792690  | 0.762198  |
| H | -8.359674 | 1.525429  | 2.235574  |
| C | -7.347924 | 3.571582  | 0.661141  |
| H | -6.755139 | 4.490315  | 0.525803  |
| H | -8.300010 | 3.838608  | 1.150915  |
| H | -7.577958 | 3.169579  | -0.339851 |
| C | -4.004670 | 0.488287  | -2.285742 |
| H | -4.655022 | -0.363700 | -2.040439 |
| C | -2.770252 | -0.106692 | -2.978827 |
| H | -2.063737 | -0.537671 | -2.264154 |
| H | -2.235122 | 0.632963  | -3.587520 |
| H | -3.107011 | -0.913710 | -3.648525 |
| C | -4.780281 | 1.365629  | -3.301073 |
| H | -5.741761 | 1.714311  | -2.894814 |
| H | -4.981773 | 0.793838  | -4.223060 |
| H | -4.192918 | 2.255608  | -3.580154 |
| C | -1.741920 | 3.820056  | 1.003453  |
| H | -0.785258 | 3.451298  | 0.614915  |
| C | -2.044150 | 5.159032  | 0.293077  |
| H | -2.124636 | 5.025530  | -0.796979 |
| H | -1.238958 | 5.885886  | 0.494931  |
| H | -2.992199 | 5.590162  | 0.656471  |
| C | -1.561455 | 4.041000  | 2.515577  |
| H | -1.370229 | 3.083815  | 3.019555  |

|   |           |           |           |
|---|-----------|-----------|-----------|
| H | -2.440029 | 4.527488  | 2.969739  |
| H | -0.692074 | 4.695894  | 2.694174  |
| C | -1.393598 | 1.817574  | -1.198807 |
| C | 0.897285  | 2.252936  | -2.761531 |
| C | -0.171813 | 1.136905  | -0.857010 |
| C | -1.424035 | 2.642039  | -2.345200 |
| C | -0.312932 | 2.813930  | -3.168465 |
| C | 1.008641  | 1.481933  | -1.583119 |
| H | -2.359307 | 3.153775  | -2.573536 |
| H | -0.368203 | 3.437726  | -4.064560 |
| H | 1.816054  | 2.479061  | -3.303635 |
| C | 3.190718  | -2.239222 | 0.376846  |
| C | 4.925796  | -0.483910 | 1.667468  |
| C | 2.648899  | -1.251836 | 1.272848  |
| C | 4.572604  | -2.271459 | 0.125158  |
| C | 5.464400  | -1.389843 | 0.749495  |
| C | 3.555071  | -0.432278 | 2.001408  |
| H | 4.964212  | -3.038994 | -0.542994 |
| H | 5.607932  | 0.177629  | 2.211324  |
| C | 2.374062  | -3.442216 | -0.121909 |
| H | 1.311792  | -3.170012 | -0.130691 |
| C | 2.553308  | -4.629118 | 0.859026  |
| H | 1.921815  | -5.478601 | 0.549789  |
| H | 3.604567  | -4.962167 | 0.852549  |
| H | 2.289381  | -4.365551 | 1.889473  |
| C | 2.750176  | -3.958823 | -1.524681 |
| H | 3.734616  | -4.453830 | -1.518714 |
| H | 2.776467  | -3.167090 | -2.278483 |
| H | 2.016116  | -4.714417 | -1.847147 |
| C | 3.301486  | 0.352121  | 3.302286  |
| H | 3.979689  | 1.222604  | 3.244775  |
| C | 3.788196  | -0.504526 | 4.500891  |
| H | 4.811910  | -0.880341 | 4.350830  |
| H | 3.125261  | -1.372028 | 4.650692  |
| H | 3.763826  | 0.095715  | 5.426145  |

|   |           |           |           |
|---|-----------|-----------|-----------|
| C | 1.909042  | 0.890672  | 3.616198  |
| H | 1.488891  | 1.490445  | 2.798431  |
| H | 1.955584  | 1.536947  | 4.509316  |
| H | 1.187221  | 0.088569  | 3.823244  |
| C | 6.977510  | -1.496709 | 0.595710  |
| H | 7.388431  | -0.479076 | 0.705052  |
| C | 7.553100  | -2.351156 | 1.749828  |
| H | 7.158466  | -3.379995 | 1.697924  |
| H | 7.273417  | -1.934212 | 2.730075  |
| H | 8.654035  | -2.401257 | 1.693586  |
| C | 7.440854  | -2.053809 | -0.759922 |
| H | 7.173690  | -3.117689 | -0.870430 |
| H | 8.537458  | -1.981879 | -0.846263 |
| H | 6.991903  | -1.504194 | -1.600737 |
| C | -5.001628 | -2.515118 | -0.807926 |
| C | -2.493373 | -1.800404 | 0.355484  |
| C | -4.929159 | -1.763953 | 0.371728  |
| C | -3.792061 | -2.916171 | -1.395377 |
| C | -2.545482 | -2.585526 | -0.838922 |
| C | -3.709238 | -1.423464 | 0.991334  |
| H | -5.852964 | -1.452496 | 0.864602  |
| H | -3.827784 | -3.529593 | -2.298800 |
| C | -6.335841 | -2.968740 | -1.388907 |
| H | -6.130171 | -3.381339 | -2.392738 |
| C | -7.347540 | -1.818133 | -1.550813 |
| H | -6.938717 | -1.007456 | -2.173757 |
| H | -7.623532 | -1.389743 | -0.574053 |
| H | -8.273914 | -2.183258 | -2.024425 |
| C | -6.930921 | -4.105177 | -0.527549 |
| H | -6.217750 | -4.939341 | -0.430445 |
| H | -7.863101 | -4.492016 | -0.973227 |
| H | -7.163113 | -3.741349 | 0.487125  |
| C | -3.887014 | -0.765892 | 2.370398  |
| H | -4.705074 | -0.043463 | 2.218705  |
| C | -2.730072 | 0.029359  | 2.979911  |

|   |           |           |           |
|---|-----------|-----------|-----------|
| H | -2.287560 | 0.731650  | 2.262910  |
| H | -1.929225 | -0.615663 | 3.364819  |
| H | -3.109563 | 0.628210  | 3.824703  |
| C | -4.396287 | -1.809224 | 3.395927  |
| H | -5.264108 | -2.370984 | 3.017370  |
| H | -4.690524 | -1.306105 | 4.332472  |
| H | -3.604111 | -2.533317 | 3.642992  |
| C | -1.294760 | -3.250859 | -1.420554 |
| H | -0.423835 | -2.661332 | -1.106294 |
| C | -1.148201 | -4.670731 | -0.826145 |
| H | -1.096974 | -4.648823 | 0.270935  |
| H | -0.234444 | -5.155798 | -1.205765 |
| H | -2.010999 | -5.292966 | -1.116693 |
| C | -1.259726 | -3.342394 | -2.957129 |
| H | -1.333684 | -2.356763 | -3.432648 |
| H | -2.072450 | -3.974861 | -3.348765 |
| H | -0.311075 | -3.803464 | -3.274199 |
| C | -1.191324 | -1.804969 | 1.117179  |
| C | 1.061599  | -2.389917 | 2.679741  |
| C | 0.001531  | -1.031404 | 0.921154  |
| C | -1.206911 | -2.826601 | 2.094813  |
| C | -0.131102 | -3.058174 | 2.948438  |
| C | 1.189665  | -1.452380 | 1.631610  |
| H | -2.123978 | -3.407313 | 2.197731  |
| H | -0.198019 | -3.791697 | 3.755955  |
| H | 1.961031  | -2.628814 | 3.247786  |
| B | -0.182788 | 1.257512  | 1.479206  |
| N | -0.066022 | 0.363257  | 0.401483  |

-----  
--

-----  
--

M062X/Def2-TZVP

-----  
--

-----  
--  
F-B≡N-F  
-----

-----

| Atomic<br>Number | Coordinates (Angstroms) |          |           |
|------------------|-------------------------|----------|-----------|
|                  | X                       | Y        | Z         |
| B                | 0.000000                | 0.000000 | 0.653708  |
| N                | 0.000000                | 0.000000 | -0.566393 |
| F                | 0.000000                | 0.000000 | -1.872872 |
| F                | 0.000000                | 0.000000 | 1.950229  |

-----

-----  
--  
F2-B=N  
-----

-----

| Atomic<br>Number | Coordinates (Angstroms) |           |           |
|------------------|-------------------------|-----------|-----------|
|                  | X                       | Y         | Z         |
| B                | 0.000127                | 0.047013  | 0.000670  |
| N                | -0.008165               | 1.468837  | -0.000147 |
| F                | -1.153809               | -0.589889 | -0.000129 |
| F                | 1.160089                | -0.578658 | -0.000129 |

-----

-----  
--  
B=N-F2  
-----  
--

| Atomic<br>Number | Coordinates (Angstroms) |   |   |
|------------------|-------------------------|---|---|
|                  | X                       | Y | Z |

--

|   |           |           |           |
|---|-----------|-----------|-----------|
| B | 0.005504  | 1.652777  | -0.002506 |
| N | 0.000668  | 0.228178  | 0.005076  |
| F | 1.087653  | -0.551114 | -0.001278 |
| F | -1.091230 | -0.544567 | -0.001278 |

--

F-B≡N-F-TS1

--

| Atomic<br>Number | Coordinates (Angstroms) |   |   |
|------------------|-------------------------|---|---|
|                  | X                       | Y | Z |

--

|   |           |           |           |
|---|-----------|-----------|-----------|
| B | 0.461941  | 0.274649  | 0.007134  |
| N | -0.745317 | 0.807228  | -0.002451 |
| F | -1.311237 | -0.567947 | -0.000037 |
| F | 1.634295  | -0.212480 | -0.002020 |

--

F-B≡N-F-TS2

--

| Atomic<br>Number | Coordinates (Angstroms) |   |   |
|------------------|-------------------------|---|---|
|                  | X                       | Y | Z |

--

|   |           |          |           |
|---|-----------|----------|-----------|
| B | -0.786337 | 0.916567 | -0.322053 |
|---|-----------|----------|-----------|



|   |           |           |           |
|---|-----------|-----------|-----------|
| N | 0.314776  | 0.265947  | 0.545814  |
| F | 1.268581  | -0.185734 | -0.229720 |
| F | -1.076552 | -0.530317 | -0.015883 |

--

HO-B≡N-OH

--

| Atomic<br>Number | Coordinates (Angstroms) |   |   |
|------------------|-------------------------|---|---|
|                  | X                       | Y | Z |

--

|   |           |           |           |
|---|-----------|-----------|-----------|
| B | -0.644957 | 0.016667  | -0.018579 |
| N | 0.583448  | 0.148378  | 0.054813  |
| O | 1.882940  | -0.181279 | -0.048509 |
| H | 2.366160  | 0.610549  | 0.215785  |
| O | -1.981199 | 0.012310  | -0.096226 |
| H | -2.439439 | -0.380785 | 0.651295  |

--

(OH)<sub>2</sub>-B≡N

--

| Atomic<br>Number | Coordinates (Angstroms) |   |   |
|------------------|-------------------------|---|---|
|                  | X                       | Y | Z |

--

|   |           |           |           |
|---|-----------|-----------|-----------|
| B | 0.051611  | 0.109798  | 0.000845  |
| N | -0.771775 | 1.258198  | -0.001143 |
| O | 1.403013  | 0.053494  | 0.001112  |
| H | 1.737113  | -0.848591 | 0.001185  |

|   |           |           |           |
|---|-----------|-----------|-----------|
| O | -0.762729 | -1.008395 | -0.004166 |
| H | -1.715010 | -0.868571 | 0.027027  |

-----  
--  
-----  
--  
B≡N-(OH)2  
-----

| Atomic<br>Number | Coordinates (Angstroms) |           |           |
|------------------|-------------------------|-----------|-----------|
|                  | X                       | Y         | Z         |
| B                | 0.012156                | 1.629720  | 0.000357  |
| N                | 0.000425                | 0.230786  | -0.000656 |
| O                | -1.147349               | -0.504682 | -0.116865 |
| H                | -1.376750               | -0.787157 | 0.780429  |
| O                | 1.140452                | -0.517213 | 0.117170  |
| H                | 1.368166                | -0.801786 | -0.780067 |

-----  
--  
-----  
--  
HO-B≡N-OH-TS1  
-----

| Atomic<br>Number | Coordinates (Angstroms) |           |           |
|------------------|-------------------------|-----------|-----------|
|                  | X                       | Y         | Z         |
| N                | -0.757262               | 0.822971  | -0.033815 |
| B                | 0.451357                | 0.312558  | 0.028710  |
| O                | 1.657534                | -0.199701 | 0.112182  |

|   |           |           |           |
|---|-----------|-----------|-----------|
| H | 2.083353  | -0.448245 | -0.715126 |
| O | -1.311437 | -0.579784 | -0.101425 |
| H | -1.808082 | -0.639460 | 0.722226  |

--

HO-B≡N-OH-TS2

--

| Atomic<br>Number | Coordinates (Angstroms) |   |   |
|------------------|-------------------------|---|---|
|                  | X                       | Y | Z |

--

|   |           |           |           |
|---|-----------|-----------|-----------|
| B | -0.787261 | 0.955471  | 0.294034  |
| N | 0.307765  | 0.306985  | -0.460842 |
| O | 1.302029  | -0.147818 | 0.263809  |
| H | 1.849521  | -0.682488 | -0.331482 |
| O | -1.163178 | -0.512992 | -0.098737 |
| H | -1.178375 | -0.957282 | 0.766632  |

--

H-B≡N-H

--

| Atomic<br>Number | Coordinates (Angstroms) |   |   |
|------------------|-------------------------|---|---|
|                  | X                       | Y | Z |

--

|   |           |           |           |
|---|-----------|-----------|-----------|
| B | -0.690862 | -0.000371 | 0.000004  |
| N | 0.539953  | 0.000319  | 0.000001  |
| H | 1.532532  | -0.000938 | -0.000013 |
| H | -1.857895 | 0.000564  | -0.000015 |

-----  
--  
-----  
--  
H2-B≡N  
-----  
--

| Atomic<br>Number | Coordinates (Angstroms) |   |   |
|------------------|-------------------------|---|---|
|                  | X                       | Y | Z |

-----  
--

|   |           |           |           |
|---|-----------|-----------|-----------|
| B | 0.576895  | 0.000017  | -0.002558 |
| N | -0.728981 | -0.000013 | 0.000529  |
| H | 1.109135  | 1.070914  | 0.004543  |
| H | 1.109254  | -1.070906 | 0.004543  |

-----  
--  
-----  
--

B≡N-H2  
-----  
--

| Atomic<br>Number | Coordinates (Angstroms) |   |   |
|------------------|-------------------------|---|---|
|                  | X                       | Y | Z |

-----  
--

|   |           |           |           |
|---|-----------|-----------|-----------|
| B | 0.960580  | -0.000108 | 0.000003  |
| N | -0.412028 | -0.000055 | -0.000006 |
| H | -0.960084 | -0.850946 | 0.000016  |
| H | -0.958622 | 0.851871  | 0.000016  |

-----  
--  
-----  
--

H-B≡N-H-TS1

-----

--

| Atomic<br>Number | Coordinates (Angstroms) |           |           |
|------------------|-------------------------|-----------|-----------|
|                  | X                       | Y         | Z         |
| N                | -0.728223               | 0.000007  | 0.000000  |
| B                | 0.578313                | -0.000001 | -0.000001 |
| H                | 1.103039                | 1.074888  | 0.000001  |
| H                | 1.102956                | -1.074933 | 0.000001  |

-----

--

-----

--

H-B≡N-H-TS2

-----

--

| Atomic<br>Number | Coordinates (Angstroms) |           |           |
|------------------|-------------------------|-----------|-----------|
|                  | X                       | Y         | Z         |
| N                | -0.444661               | -0.043934 | 0.005773  |
| B                | 0.827456                | -0.151135 | -0.003380 |
| H                | 0.424451                | 1.083099  | -0.001130 |
| H                | -1.449101               | -0.019885 | -0.022381 |

-----

--

-----

--

3HC-B≡N-CH3

-----

--

| Atomic<br>Number | Coordinates (Angstroms) |   |   |
|------------------|-------------------------|---|---|
|                  | X                       | Y | Z |

-----

--

|   |           |           |           |
|---|-----------|-----------|-----------|
| H | -2.548612 | 0.448437  | -0.915107 |
| C | -2.161520 | 0.000355  | -0.000004 |
| H | -2.548295 | 0.570249  | 0.844842  |
| H | -2.550868 | -1.015230 | 0.070238  |
| B | -0.619937 | -0.001038 | 0.000011  |
| N | 0.615641  | -0.000928 | 0.000021  |
| C | 2.025459  | 0.000474  | -0.000005 |
| H | 2.417465  | 0.566309  | 0.848230  |
| H | 2.417507  | 0.453331  | -0.913584 |
| H | 2.419367  | -1.016384 | 0.065230  |

--

(CH3)2-B≡N

--

| Atomic<br>Number | Coordinates (Angstroms) |   |   |
|------------------|-------------------------|---|---|
|                  | X                       | Y | Z |

--

|   |           |           |           |
|---|-----------|-----------|-----------|
| N | -0.001131 | 1.484299  | 0.000000  |
| B | 0.000125  | 0.168119  | -0.000009 |
| C | -1.424886 | -0.560358 | 0.000109  |
| H | -1.472339 | -1.191152 | -0.888196 |
| H | -2.267691 | 0.124727  | 0.000195  |
| H | -1.472227 | -1.192315 | 0.887341  |
| C | 1.425612  | -0.559226 | -0.000112 |
| H | 2.267714  | 0.126686  | -0.000457 |
| H | 1.473585  | -1.191383 | -0.887129 |
| H | 1.473896  | -1.189753 | 0.888309  |

--

--  
B≡N-(CH3)2

---

--

| Atomic<br>Number | Coordinates (Angstroms) |           |           |
|------------------|-------------------------|-----------|-----------|
|                  | X                       | Y         | Z         |
| H                | 2.088273                | 0.185326  | 0.000844  |
| C                | 1.236854                | -0.494798 | 0.000040  |
| H                | 1.291578                | -1.127067 | -0.888858 |
| H                | 1.290270                | -1.126742 | 0.889208  |
| N                | -0.000025               | 0.269590  | -0.000492 |
| B                | -0.001805               | 1.640495  | 0.000167  |
| C                | -1.235841               | -0.496413 | 0.000085  |
| H                | -1.290746               | -1.126197 | 0.890602  |
| H                | -2.087714               | 0.183138  | -0.002632 |
| H                | -1.288541               | -1.130794 | -0.887304 |

---

--  
-----  
--  
3HC-B≡N-CH3-TS1

---

--

| Atomic<br>Number | Coordinates (Angstroms) |           |           |
|------------------|-------------------------|-----------|-----------|
|                  | X                       | Y         | Z         |
| B                | -0.778754               | 1.194160  | -0.001088 |
| N                | 0.255786                | 0.424213  | 0.001884  |
| C                | -1.319309               | -0.591846 | -0.000070 |
| H                | -1.922577               | -0.568572 | -0.899398 |
| H                | -1.924128               | -0.567773 | 0.898163  |
| H                | -0.680909               | -1.474957 | 0.000794  |

---

|   |          |           |           |
|---|----------|-----------|-----------|
| C | 1.503259 | -0.255014 | -0.000433 |
| H | 1.620362 | -0.874761 | 0.890360  |
| H | 2.289992 | 0.499278  | -0.001350 |
| H | 1.616827 | -0.872351 | -0.893299 |

-----  
 --  
 -----  
 --  
 3HC-B≡N-CH3-TS2  
 -----

--  
 Atomic Coordinates (Angstroms)  
 Number X Y Z  
 -----

|   |           |           |           |
|---|-----------|-----------|-----------|
| B | -0.778110 | 1.193799  | 0.000244  |
| N | 0.256424  | 0.424392  | -0.000374 |
| C | -1.319997 | -0.591390 | 0.000010  |
| H | -1.924285 | -0.567698 | -0.898590 |
| H | -1.924165 | -0.567806 | 0.898694  |
| H | -0.681880 | -1.474644 | -0.000046 |
| C | 1.502983  | -0.255670 | 0.000117  |
| H | 1.619348  | -0.874863 | -0.891144 |
| H | 1.620129  | -0.872201 | 0.893113  |
| H | 2.288522  | 0.499829  | -0.001390 |

-----  
 --  
 -----  
 --  
 3HSi-B≡N-SiH3  
 -----

--  
 Atomic Coordinates (Angstroms)  
 Number X Y Z  
 -----



--

|    |           |           |           |
|----|-----------|-----------|-----------|
| B  | -0.551154 | 0.011880  | -0.009108 |
| N  | 0.696992  | -0.007262 | -0.003828 |
| H  | -3.004505 | 0.106872  | 1.396148  |
| Si | -2.533943 | -0.000419 | 0.001549  |
| H  | -3.010416 | -1.266296 | -0.591685 |
| H  | -3.036986 | 1.142101  | -0.785531 |
| Si | 2.405543  | 0.000488  | 0.001568  |
| H  | 2.913067  | -0.890921 | -1.060282 |
| H  | 2.907971  | -0.472070 | 1.309038  |
| H  | 2.905285  | 1.370780  | -0.239007 |

--

(SiH3)2-B≡N

--

| Atomic<br>Number | Coordinates (Angstroms) |           |           |
|------------------|-------------------------|-----------|-----------|
|                  | X                       | Y         | Z         |
| B                | 0.000271                | 0.084793  | -0.002373 |
| N                | -0.001569               | 1.352812  | 0.000269  |
| Si               | 1.984339                | -0.273165 | 0.000212  |
| H                | 2.741745                | 0.986391  | -0.005953 |
| H                | 2.285411                | -1.058228 | -1.210778 |
| H                | 2.284068                | -1.045939 | 1.219329  |
| Si               | -1.983805               | -0.273654 | 0.000182  |
| H                | -2.281359               | -1.057796 | 1.212598  |
| H                | -2.285469               | -1.047881 | -1.217559 |
| H                | -2.742237               | 0.985272  | 0.006831  |

--

--  
B≡N-(SiH3)2

---

--

| Atomic<br>Number | Coordinates (Angstroms) |           |           |
|------------------|-------------------------|-----------|-----------|
|                  | X                       | Y         | Z         |
| B                | 0.002540                | 1.890671  | -0.002319 |
| N                | -0.000240               | 0.522271  | 0.004668  |
| Si               | -1.542405               | -0.343047 | -0.000524 |
| H                | -2.633296               | 0.640893  | -0.041358 |
| H                | -1.615579               | -1.165471 | 1.220308  |
| H                | -1.572061               | -1.218938 | -1.185741 |
| Si               | 1.541662                | -0.344072 | -0.000325 |
| H                | 1.624820                | -1.139051 | -1.238634 |
| H                | 2.633066                | 0.638029  | 0.070347  |
| H                | 1.562428                | -1.245046 | 1.165885  |

---

--  
-----  
--  
3HSi-B≡N-SiH3-TS1

---

--

| Atomic<br>Number | Coordinates (Angstroms) |           |           |
|------------------|-------------------------|-----------|-----------|
|                  | X                       | Y         | Z         |
| B                | 0.000053                | 0.085989  | -0.002944 |
| N                | -0.000399               | 1.354100  | 0.000515  |
| Si               | 1.983825                | -0.273594 | 0.000200  |
| H                | 2.743953                | 0.983977  | 0.002966  |
| H                | 2.284750                | -1.051617 | -1.215288 |
| H                | 2.279684                | -1.055014 | 1.214644  |

---

|    |           |           |           |
|----|-----------|-----------|-----------|
| Si | -1.983720 | -0.273703 | 0.000212  |
| H  | -2.276459 | -1.063176 | 1.210336  |
| H  | -2.286620 | -1.044125 | -1.219499 |
| H  | -2.744245 | 0.983466  | 0.012182  |

-----  
 --  
 -----  
 --  
 3HSi-B≡N-SiH3-TS2  
 -----

| Atomic<br>Number | Coordinates (Angstroms) |           |           |
|------------------|-------------------------|-----------|-----------|
|                  | X                       | Y         | Z         |
| B                | -0.744063               | 1.497394  | -0.000051 |
| N                | 0.227165                | 0.652503  | 0.000061  |
| Si               | -1.630637               | -0.367792 | -0.000000 |
| H                | -2.449878               | -0.386324 | -1.223979 |
| H                | -2.449732               | -0.386359 | 1.224072  |
| H                | -0.839008               | -1.622938 | -0.000082 |
| Si               | 1.734580                | -0.224178 | -0.000008 |
| H                | 1.795004                | -1.067690 | -1.205352 |
| H                | 1.794521                | -1.068587 | 1.204726  |
| H                | 2.824059                | 0.764988  | 0.000563  |

-----  
 --  
 -----  
 --  
 B3PW91/Def2-TZVP  
 -----

-----  
 --  
 -----  
 --  
 F-B≡N-F

---

--

| Atomic<br>Number | Coordinates (Angstroms) |           |           |
|------------------|-------------------------|-----------|-----------|
|                  | X                       | Y         | Z         |
| B                | 0.641794                | -0.022021 | 0.000049  |
| N                | -0.574130               | 0.245885  | -0.000006 |
| F                | -1.844260               | -0.122773 | -0.000006 |
| F                | 1.934254                | -0.056237 | -0.000017 |

---

--

---

--

F2-B=N

---

--

| Atomic<br>Number | Coordinates (Angstroms) |           |           |
|------------------|-------------------------|-----------|-----------|
|                  | X                       | Y         | Z         |
| B                | 0.000137                | 0.049243  | -0.000636 |
| N                | -0.005265               | 1.459742  | 0.000140  |
| F                | -1.162044               | -0.584926 | 0.000122  |
| F                | 1.166063                | -0.577786 | 0.000122  |

---

--

---

--

B=N-F2

---

--

| Atomic<br>Number | Coordinates (Angstroms) |   |   |
|------------------|-------------------------|---|---|
|                  | X                       | Y | Z |

---

--

|   |           |           |           |
|---|-----------|-----------|-----------|
| B | 0.000770  | 1.658035  | -0.000474 |
| N | 0.000102  | 0.227916  | 0.000961  |
| F | 1.100105  | -0.549656 | -0.000242 |
| F | -1.100612 | -0.548742 | -0.000242 |

-----  
--

--

F-B≡N-F-TSH

-----  
--

| Atomic<br>Number | Coordinates (Angstroms) |   |   |
|------------------|-------------------------|---|---|
|                  | X                       | Y | Z |

-----  
--

|   |           |           |           |
|---|-----------|-----------|-----------|
| B | 0.474535  | 0.253734  | -0.000085 |
| N | -0.728029 | 0.808595  | 0.000028  |
| F | -1.354623 | -0.553422 | 0.000001  |
| F | 1.657237  | -0.216449 | 0.000024  |

-----  
--

--

F-B≡N-F-TS2

-----  
--

| Atomic<br>Number | Coordinates (Angstroms) |   |   |
|------------------|-------------------------|---|---|
|                  | X                       | Y | Z |

-----  
--

|   |           |           |           |
|---|-----------|-----------|-----------|
| B | -0.793699 | 0.966246  | -0.295223 |
| N | 0.281254  | 0.229038  | 0.557970  |
| F | 1.273908  | -0.161660 | -0.230545 |
| F | -1.051717 | -0.553283 | -0.039419 |

HO-B≡N-OH

| Atomic<br>Number | Coordinates (Angstroms) |           |           |
|------------------|-------------------------|-----------|-----------|
|                  | X                       | Y         | Z         |
| B                | -0.636568               | 0.011690  | -0.014062 |
| N                | 0.591203                | 0.264309  | 0.021827  |
| O                | 1.849524                | -0.237388 | -0.007311 |
| H                | 2.419369                | 0.537568  | 0.060369  |
| O                | -1.967492               | -0.047124 | -0.101912 |
| H                | -2.431208               | -0.170084 | 0.730932  |

(OH)<sub>2</sub>-B≡N

| Atomic<br>Number | Coordinates (Angstroms) |           |           |
|------------------|-------------------------|-----------|-----------|
|                  | X                       | Y         | Z         |
| B                | 0.189511                | -0.201678 | 0.003241  |
| N                | -0.921576               | -0.966861 | -0.000710 |
| O                | 1.525449                | -0.048779 | -0.029261 |
| H                | 1.828845                | 0.852418  | 0.107139  |
| O                | -0.909652               | 0.784046  | 0.109017  |
| H                | -1.251743               | 1.041857  | -0.756418 |

--

--

B≡N-(OH)<sub>2</sub>

--

| Atomic<br>Number | Coordinates (Angstroms) |           |           |
|------------------|-------------------------|-----------|-----------|
|                  | X                       | Y         | Z         |
| B                | -0.000863               | 1.628092  | -0.000010 |
| N                | -0.000019               | 0.226934  | -0.000180 |
| O                | -1.151660               | -0.511573 | -0.118184 |
| H                | -1.392098               | -0.776004 | 0.782868  |
| O                | 1.152189                | -0.510527 | 0.118299  |
| H                | 1.392306                | -0.776192 | -0.782484 |

--

--

HO-B≡N-OH-TS1

--

| Atomic<br>Number | Coordinates (Angstroms) |           |           |
|------------------|-------------------------|-----------|-----------|
|                  | X                       | Y         | Z         |
| N                | -0.735139               | 0.823107  | -0.028678 |
| B                | 0.460848                | 0.272142  | 0.014760  |
| O                | 1.683528                | -0.199622 | 0.115105  |
| H                | 2.125402                | -0.437020 | -0.707153 |
| O                | -1.364608               | -0.561060 | -0.103111 |
| H                | -1.835022               | -0.599985 | 0.738148  |

--

HO-B≡N-OH-TS2

| Atomic<br>Number | Coordinates (Angstroms) |           |           |
|------------------|-------------------------|-----------|-----------|
|                  | X                       | Y         | Z         |
| B                | -0.821175               | 1.015791  | 0.256635  |
| N                | 0.248720                | 0.293105  | -0.441413 |
| O                | 1.305433                | -0.118617 | 0.251158  |
| H                | 1.833257                | -0.641118 | -0.371841 |
| O                | -1.110685               | -0.574832 | -0.081155 |
| H                | -1.026409               | -0.941979 | 0.818536  |

H-B≡N-H

| Atomic<br>Number | Coordinates (Angstroms) |           |           |
|------------------|-------------------------|-----------|-----------|
|                  | X                       | Y         | Z         |
| B                | 0.689267                | 0.002669  | 0.061876  |
| N                | -0.539180               | -0.002055 | -0.048404 |
| H                | -1.527003               | -0.006029 | -0.137083 |
| H                | 1.854929                | 0.007070  | 0.166535  |



--

H2-B≡N

-----

--

| Atomic<br>Number | Coordinates (Angstroms) |   |   |
|------------------|-------------------------|---|---|
|                  | X                       | Y | Z |

-----

--

|   |           |           |           |
|---|-----------|-----------|-----------|
| B | 0.570541  | 0.000000  | -0.001436 |
| N | -0.731100 | -0.000009 | 0.000309  |
| H | 1.132444  | 1.063515  | 0.002508  |
| H | 1.132551  | -1.063456 | 0.002508  |

-----

--

-----

--

B≡N-H2

-----

--

| Atomic<br>Number | Coordinates (Angstroms) |   |   |
|------------------|-------------------------|---|---|
|                  | X                       | Y | Z |

-----

--

|   |           |           |           |
|---|-----------|-----------|-----------|
| B | -0.960859 | -0.000007 | 0.000013  |
| N | 0.412127  | -0.000003 | -0.000033 |
| H | 0.959653  | 0.850920  | 0.000083  |
| H | 0.959752  | -0.850859 | 0.000083  |

-----

--

-----

--

H-B≡N-H-TSH

-----

--

| Atomic | Coordinates (Angstroms) |  |  |
|--------|-------------------------|--|--|
|--------|-------------------------|--|--|

| Number | X         | Y         | Z        |
|--------|-----------|-----------|----------|
| --     |           |           |          |
| N      | -0.730296 | 0.000001  | 0.000000 |
| B      | 0.571752  | 0.000000  | 0.000000 |
| H      | 1.126658  | 1.067086  | 0.000000 |
| H      | 1.126652  | -1.067090 | 0.000000 |

--

H-B≡N-H-TS2

| Atomic<br>Number | Coordinates (Angstroms) |           |           |
|------------------|-------------------------|-----------|-----------|
|                  | X                       | Y         | Z         |
| --               |                         |           |           |
| N                | -0.444518               | -0.047229 | 0.011160  |
| B                | 0.834772                | -0.144373 | -0.006538 |
| H                | 0.385511                | 1.079683  | -0.002048 |
| H                | -1.447746               | -0.027218 | -0.043380 |

--

3HC-B≡N-CH3

| Atomic<br>Number | Coordinates (Angstroms) |          |           |
|------------------|-------------------------|----------|-----------|
|                  | X                       | Y        | Z         |
| --               |                         |          |           |
| H                | -2.551751               | 0.957041 | -0.351043 |
| C                | -2.159000               | 0.000037 | -0.000012 |

|   |           |           |           |
|---|-----------|-----------|-----------|
| H | -2.551996 | -0.174334 | 1.004217  |
| H | -2.552136 | -0.782349 | -0.653204 |
| B | -0.620916 | -0.000124 | 0.000000  |
| N | 0.617969  | -0.000061 | 0.000052  |
| C | 2.021175  | 0.000043  | -0.000019 |
| H | 2.420643  | -0.164294 | 1.006623  |
| H | 2.420449  | 0.954065  | -0.361045 |
| H | 2.420541  | -0.789562 | -0.645728 |

-----  
--

-----  
--  
(CH3)2-B≡N

-----  
--  
Atomic Coordinates (Angstroms)  
Number X Y Z

|   |           |           |           |
|---|-----------|-----------|-----------|
| N | -0.001196 | 1.489251  | -0.000010 |
| B | 0.000126  | 0.177514  | 0.000024  |
| C | -1.425405 | -0.565218 | 0.000091  |
| H | -1.469641 | -1.194551 | -0.891496 |
| H | -2.270395 | 0.119306  | 0.000221  |
| H | -1.469252 | -1.195492 | 0.890832  |
| C | 1.426183  | -0.564006 | -0.000101 |
| H | 2.270433  | 0.121335  | -0.000940 |
| H | 1.470448  | -1.194818 | -0.890383 |
| H | 1.471477  | -1.192758 | 0.891771  |

-----  
--

-----  
--  
B≡N-(CH3)2

--

| Atomic<br>Number | Coordinates (Angstroms) |   |   |
|------------------|-------------------------|---|---|
|                  | X                       | Y | Z |

--

|   |           |           |           |
|---|-----------|-----------|-----------|
| H | 2.086933  | 0.197347  | -0.002183 |
| C | 1.240777  | -0.491989 | -0.000247 |
| H | 1.305475  | -1.124704 | -0.890189 |
| H | 1.309300  | -1.124441 | 0.889656  |
| N | 0.000018  | 0.262099  | 0.001683  |
| B | -0.000408 | 1.635214  | -0.000654 |
| C | -1.240571 | -0.492323 | -0.000246 |
| H | -1.310068 | -1.123246 | 0.890683  |
| H | -2.086855 | 0.196830  | -0.004421 |
| H | -1.304109 | -1.126677 | -0.889098 |

--

3HC-B≡N-CH3-TS1

--

| Atomic<br>Number | Coordinates (Angstroms) |   |   |
|------------------|-------------------------|---|---|
|                  | X                       | Y | Z |

--

|   |           |           |           |
|---|-----------|-----------|-----------|
| B | -0.772843 | 1.209540  | -0.002551 |
| N | 0.246614  | 0.408694  | 0.004199  |
| C | -1.313454 | -0.594881 | -0.000230 |
| H | -1.912126 | -0.567032 | -0.904481 |
| H | -1.920362 | -0.561695 | 0.898301  |
| H | -0.690291 | -1.491116 | 0.005548  |
| C | 1.499342  | -0.250481 | -0.001213 |
| H | 1.636925  | -0.872626 | 0.887824  |
| H | 2.273903  | 0.519276  | 0.002013  |

H 1.634539 -0.863188 -0.897178

-----

--

-----

--

3HC-B≡N-CH3-TS2

-----

--

| Atomic<br>Number | Coordinates (Angstroms) |   |   |
|------------------|-------------------------|---|---|
|                  | X                       | Y | Z |

-----

--

|   |           |           |           |
|---|-----------|-----------|-----------|
| B | -0.772115 | 1.209488  | 0.001448  |
| N | 0.246666  | 0.407774  | -0.002379 |
| C | -1.314379 | -0.594244 | 0.000110  |
| H | -1.917340 | -0.563406 | -0.901197 |
| H | -1.917044 | -0.563268 | 0.901626  |
| H | -0.691955 | -1.491011 | 0.000003  |
| C | 1.499858  | -0.250487 | 0.000685  |
| H | 1.637508  | -0.870341 | -0.889943 |
| H | 1.635992  | -0.865288 | 0.895077  |
| H | 2.273879  | 0.519843  | -0.000923 |

-----

--

-----

--

3HSi-B≡N-SiH3

-----

--

| Atomic<br>Number | Coordinates (Angstroms) |   |   |
|------------------|-------------------------|---|---|
|                  | X                       | Y | Z |

-----

--

|    |           |           |           |
|----|-----------|-----------|-----------|
| H  | -3.028357 | -1.297204 | 0.522257  |
| Si | -2.534046 | 0.000186  | -0.000230 |

|    |           |           |           |
|----|-----------|-----------|-----------|
| H  | -3.025858 | 0.196535  | -1.385972 |
| H  | -3.027141 | 1.102262  | 0.861747  |
| B  | -0.553406 | -0.000712 | 0.000889  |
| N  | 0.698853  | -0.000860 | 0.001040  |
| Si | 2.406325  | 0.000246  | -0.000303 |
| H  | 2.913493  | 0.196862  | -1.381945 |
| H  | 2.916215  | -1.293624 | 0.519899  |
| H  | 2.914793  | 1.098693  | 0.859761  |

-----  
--

-----  
--

(SiH3)2-B≡N

-----  
--

| Atomic<br>Number | Coordinates (Angstroms) |   |   |
|------------------|-------------------------|---|---|
|                  | X                       | Y | Z |

-----  
--

|    |           |           |           |
|----|-----------|-----------|-----------|
| B  | 0.001725  | 0.471375  | -0.064658 |
| N  | -0.019108 | 1.745845  | 0.013033  |
| Si | 1.826258  | -0.385381 | 0.003281  |
| H  | 2.888704  | 0.642281  | 0.014114  |
| H  | 1.963944  | -1.258395 | -1.188430 |
| H  | 1.872987  | -1.198317 | 1.243150  |
| Si | -1.819450 | -0.394040 | 0.003436  |
| H  | -1.866872 | -1.182417 | 1.260217  |
| H  | -1.936192 | -1.292856 | -1.172846 |
| H  | -2.892742 | 0.623811  | -0.018175 |

-----  
--

-----  
--

B≡N-(SiH3)2

-----  
--

--

| Atomic<br>Number | Coordinates (Angstroms) |   |   |
|------------------|-------------------------|---|---|
|                  | X                       | Y | Z |

--

|    |           |           |           |
|----|-----------|-----------|-----------|
| H  | -2.633487 | 0.673334  | 0.099041  |
| Si | -1.561046 | -0.338710 | 0.000219  |
| H  | -1.592332 | -1.257652 | 1.162059  |
| H  | -1.685492 | -1.119465 | -1.252164 |
| N  | 0.000151  | 0.502906  | -0.002152 |
| B  | -0.001634 | 1.872287  | 0.001271  |
| Si | 1.561488  | -0.338080 | 0.000183  |
| H  | 1.576748  | -1.288824 | -1.136875 |
| H  | 2.633072  | 0.670516  | -0.141227 |
| H  | 1.702418  | -1.084634 | 1.272253  |

--

3HSi-B≡N-SiH3-TS1

--

| Atomic<br>Number | Coordinates (Angstroms) |   |   |
|------------------|-------------------------|---|---|
|                  | X                       | Y | Z |

--

|    |           |           |           |
|----|-----------|-----------|-----------|
| B  | 0.001306  | 0.483534  | -0.114929 |
| N  | -0.007355 | 1.752417  | 0.023603  |
| Si | 1.814857  | -0.390698 | 0.005522  |
| H  | 2.891371  | 0.607890  | -0.163357 |
| H  | 1.897994  | -1.421556 | -1.058822 |
| H  | 1.889568  | -1.029485 | 1.342522  |
| Si | -1.812630 | -0.393566 | 0.005773  |
| H  | -1.917654 | -0.930731 | 1.383612  |
| H  | -1.852630 | -1.504192 | -0.978322 |

H -2.894882 0.573190 -0.274334

-----  
--  
-----  
--  
3HSi-B≡N-SiH3-TS2

-----  
--  
Atomic Coordinates (Angstroms)  
Number X Y Z

-----  
--  
B -0.738033 1.527250 0.000003  
N 0.189707 0.616047 -0.000003  
Si -1.609514 -0.372685 -0.000000  
H -2.429515 -0.372651 -1.233269  
H -2.429557 -0.372630 1.233242  
H -0.856732 -1.661480 0.000025  
Si 1.726726 -0.216128 0.000001  
H 1.827801 -1.060259 -1.211712  
H 1.827850 -1.060186 1.211760  
H 2.781398 0.822008 -0.000052

-----  
--  
-----  
--  
B3LYP/LANL2DZ+dp

-----  
--  
-----  
--  
F-B≡N-F

-----  
--  
Atomic Coordinates (Angstroms)



| Number | X         | Y         | Z         |
|--------|-----------|-----------|-----------|
| --     |           |           |           |
| B      | 0.624149  | -0.015155 | 0.000001  |
| N      | -0.589851 | 0.375610  | -0.000000 |
| F      | -1.819148 | -0.193447 | -0.000000 |
| F      | 1.931171  | -0.090274 | -0.000000 |

--

-----

--

F2-B=N

| Atomic Number | Coordinates (Angstroms) |           |           |
|---------------|-------------------------|-----------|-----------|
|               | X                       | Y         | Z         |
| --            |                         |           |           |
| B             | 0.000003                | 0.059854  | 0.000051  |
| N             | 0.000135                | 1.474186  | -0.000011 |
| F             | 1.181996                | -0.590013 | -0.000010 |
| F             | -1.182103               | -0.589829 | -0.000010 |

--

-----

--

B=N-F2

| Atomic Number | Coordinates (Angstroms) |          |           |
|---------------|-------------------------|----------|-----------|
|               | X                       | Y        | Z         |
| --            |                         |          |           |
| B             | -0.000827               | 1.675847 | -0.064321 |
| N             | -0.000088               | 0.226309 | 0.131344  |

|   |           |           |           |
|---|-----------|-----------|-----------|
| F | 1.113919  | -0.553038 | -0.033212 |
| F | -1.113391 | -0.554006 | -0.033210 |

-----  
--  
-----  
--  
F-B≡N-F-TS1  
-----

| Atomic<br>Number | Coordinates (Angstroms) |           |           |
|------------------|-------------------------|-----------|-----------|
|                  | X                       | Y         | Z         |
| B                | 0.455758                | 0.273422  | 0.000415  |
| N                | -0.751927               | 0.836344  | -0.000140 |
| F                | -1.324035               | -0.586764 | -0.000005 |
| F                | 1.655669                | -0.215626 | -0.000117 |

-----  
--  
-----  
--  
F-B≡N-F-TS2  
-----

| Atomic<br>Number | Coordinates (Angstroms) |           |           |
|------------------|-------------------------|-----------|-----------|
|                  | X                       | Y         | Z         |
| B                | -0.714576               | 1.055752  | -0.289150 |
| N                | 0.269361                | 0.231560  | 0.549748  |
| F                | 1.288943                | -0.198212 | -0.219205 |
| F                | -1.101459               | -0.568419 | -0.047738 |

--  
HO-B≡N-OH

---

--

| Atomic<br>Number | Coordinates (Angstroms) |           |           |
|------------------|-------------------------|-----------|-----------|
|                  | X                       | Y         | Z         |
| B                | -0.629717               | 0.026628  | -0.011989 |
| N                | 0.601361                | 0.359377  | 0.017699  |
| O                | 1.826249                | -0.286160 | -0.002375 |
| H                | 2.463828                | 0.443596  | 0.040327  |
| O                | -1.963345               | -0.078298 | -0.103286 |
| H                | -2.428010               | -0.176719 | 0.741015  |

---

--

--  
(OH)<sub>2</sub>-B≡N

---

--

| Atomic<br>Number | Coordinates (Angstroms) |           |           |
|------------------|-------------------------|-----------|-----------|
|                  | X                       | Y         | Z         |
| B                | 0.173879                | -0.192085 | 0.007629  |
| N                | -0.914784               | -1.010835 | -0.004665 |
| O                | 1.523529                | -0.053007 | -0.024803 |
| H                | 1.822996                | 0.862827  | 0.067985  |
| O                | -0.904773               | 0.815506  | 0.110967  |
| H                | -1.238958               | 1.073450  | -0.762784 |

---

--

---

--

B≡N-(OH)2

---

--

| Atomic<br>Number | Coordinates (Angstroms) |           |           |
|------------------|-------------------------|-----------|-----------|
|                  | X                       | Y         | Z         |
| B                | -0.000314               | 1.649079  | 0.000047  |
| N                | -0.000030               | 0.231109  | -0.000161 |
| O                | -1.163743               | -0.520384 | -0.119581 |
| H                | -1.408657               | -0.770062 | 0.790719  |
| O                | 1.163939                | -0.519992 | 0.119665  |
| H                | 1.408860                | -0.770091 | -0.790498 |

---

--

HO-B≡N-OH-TS1

---

--

| Atomic<br>Number | Coordinates (Angstroms) |           |           |
|------------------|-------------------------|-----------|-----------|
|                  | X                       | Y         | Z         |
| N                | -0.759708               | 0.859273  | -0.024494 |
| B                | 0.434105                | 0.282888  | 0.016714  |
| O                | 1.668393                | -0.195771 | 0.114635  |
| H                | 2.102783                | -0.426555 | -0.721172 |
| O                | -1.319860               | -0.594065 | -0.108689 |
| H                | -1.743614               | -0.684108 | 0.761495  |

---

--

HO-B≡N-OH-TS2

---

--

| Atomic<br>Number | Coordinates (Angstroms) |           |           |
|------------------|-------------------------|-----------|-----------|
|                  | X                       | Y         | Z         |
| B                | 0.777022                | 1.059696  | -0.257516 |
| N                | -0.261242               | 0.290063  | 0.447619  |
| O                | -1.322851               | -0.143017 | -0.253918 |
| H                | -1.843202               | -0.668109 | 0.381112  |
| O                | 1.160420                | -0.571503 | 0.078718  |
| H                | 1.086234                | -0.944652 | -0.825262 |

---

--

---

--

H-B≡N-H

---

--

| Atomic<br>Number | Coordinates (Angstroms) |           |           |
|------------------|-------------------------|-----------|-----------|
|                  | X                       | Y         | Z         |
| B                | 0.606251                | 0.064575  | 0.343292  |
| N                | -0.473028               | -0.050351 | -0.267861 |
| H                | -1.339572               | -0.142842 | -0.758517 |
| H                | 1.619514                | 0.172428  | 0.917086  |

---

--

---

--

H2-B≡N

---

--

| Atomic | Coordinates (Angstroms) |  |  |
|--------|-------------------------|--|--|
|--------|-------------------------|--|--|

| Number | X         | Y         | Z         |
|--------|-----------|-----------|-----------|
| --     |           |           |           |
| B      | 0.575603  | 0.000000  | -0.000764 |
| N      | -0.739256 | -0.000008 | 0.000166  |
| H      | 1.148336  | 1.060149  | 0.001330  |
| H      | 1.148438  | -1.060092 | 0.001330  |

--

B≡N-H2

| Atomic<br>Number | Coordinates (Angstroms) |           |           |
|------------------|-------------------------|-----------|-----------|
|                  | X                       | Y         | Z         |
| --               |                         |           |           |
| B                | -0.971848               | -0.000006 | 0.000021  |
| N                | 0.416512                | -0.000003 | -0.000053 |
| H                | 0.971785                | 0.855439  | 0.000134  |
| H                | 0.971867                | -0.855386 | 0.000134  |

--

H-B≡N-H-TS1

| Atomic<br>Number | Coordinates (Angstroms) |          |          |
|------------------|-------------------------|----------|----------|
|                  | X                       | Y        | Z        |
| --               |                         |          |          |
| N                | -0.739051               | 0.000001 | 0.000000 |
| B                | 0.575955                | 0.000000 | 0.000000 |

|   |          |           |          |
|---|----------|-----------|----------|
| H | 1.146797 | 1.060756  | 0.000000 |
| H | 1.146784 | -1.060764 | 0.000000 |

H-B≡N-H-TS2

| Atomic<br>Number | Coordinates (Angstroms) |           |           |
|------------------|-------------------------|-----------|-----------|
|                  | X                       | Y         | Z         |
| N                | -0.450754               | -0.054009 | 0.053127  |
| B                | 0.844071                | -0.141103 | -0.031247 |
| H                | 0.364912                | 1.100113  | -0.004949 |
| H                | -1.429992               | -0.016537 | -0.210707 |

3HC-B≡N-CH3

| Atomic<br>Number | Coordinates (Angstroms) |           |           |
|------------------|-------------------------|-----------|-----------|
|                  | X                       | Y         | Z         |
| H                | -2.568025               | 0.965228  | -0.347557 |
| C                | -2.173411               | 0.000054  | -0.000027 |
| H                | -2.568352               | -0.181442 | 1.009489  |
| H                | -2.568415               | -0.783357 | -0.662072 |
| B                | -0.627849               | -0.000145 | 0.000039  |
| N                | 0.621587                | -0.000110 | 0.000085  |
| C                | 2.037069                | 0.000068  | -0.000040 |

|   |          |           |           |
|---|----------|-----------|-----------|
| H | 2.437133 | -0.136970 | 1.016606  |
| H | 2.436833 | 0.949141  | -0.389711 |
| H | 2.437012 | -0.811833 | -0.627140 |

-----  
--  
-----  
--  
(CH3)2-B≡N  
-----  
--

| Atomic<br>Number | Coordinates (Angstroms) |   |   |
|------------------|-------------------------|---|---|
|                  | X                       | Y | Z |

-----  
--  

|   |           |           |           |
|---|-----------|-----------|-----------|
| N | 0.002110  | 1.518622  | -0.000133 |
| B | -0.000201 | 0.194904  | 0.000564  |
| C | 1.420936  | -0.579081 | -0.000026 |
| H | 1.453670  | -1.214293 | 0.895998  |
| H | 2.285270  | 0.091278  | -0.001799 |
| H | 1.450834  | -1.215507 | -0.895324 |
| C | -1.422328 | -0.576892 | -0.000108 |
| H | -2.285462 | 0.094825  | -0.013651 |
| H | -1.461224 | -1.202512 | 0.902337  |
| H | -1.448503 | -1.222830 | -0.888648 |

  
-----  
--  
-----  
--

B≡N-(CH3)2  
-----  
--

| Atomic<br>Number | Coordinates (Angstroms) |   |   |
|------------------|-------------------------|---|---|
|                  | X                       | Y | Z |

-----  
--



|   |           |           |           |
|---|-----------|-----------|-----------|
| H | 2.104042  | 0.185868  | -0.000460 |
| C | 1.246904  | -0.498695 | -0.000044 |
| H | 1.305334  | -1.136012 | -0.894821 |
| H | 1.306101  | -1.135910 | 0.894799  |
| N | 0.000012  | 0.269330  | 0.000302  |
| B | -0.000182 | 1.654514  | -0.000108 |
| C | -1.246807 | -0.498835 | -0.000045 |
| H | -1.306772 | -1.135022 | 0.895511  |
| H | -2.103974 | 0.185681  | -0.002010 |
| H | -1.304492 | -1.137300 | -0.894065 |

--

--

3HC-B≡N-CH3-TS1

--

| Atomic<br>Number | Coordinates (Angstroms) |           |           |
|------------------|-------------------------|-----------|-----------|
|                  | X                       | Y         | Z         |
| B                | -0.759109               | 1.237672  | -0.000389 |
| N                | 0.253844                | 0.409604  | 0.000643  |
| C                | -1.342409               | -0.601780 | -0.000039 |
| H                | -1.945118               | -0.556565 | -0.907651 |
| H                | -1.946426               | -0.555678 | 0.906664  |
| H                | -0.718401               | -1.503029 | 0.000891  |
| C                | 1.515243                | -0.261491 | -0.000187 |
| H                | 1.645998                | -0.884158 | 0.896622  |
| H                | 2.299915                | 0.506181  | 0.000311  |
| H                | 1.645671                | -0.882717 | -0.898041 |

--

--

3HC-B≡N-CH3-TS2

-----

--

| Atomic<br>Number | Coordinates (Angstroms) |           |           |
|------------------|-------------------------|-----------|-----------|
|                  | X                       | Y         | Z         |
| B                | -0.759294               | 1.237586  | 0.000746  |
| N                | 0.253698                | 0.409633  | -0.001226 |
| C                | -1.342050               | -0.601823 | 0.000066  |
| H                | -1.946501               | -0.555698 | -0.906361 |
| H                | -1.944469               | -0.557044 | 0.907922  |
| H                | -0.718004               | -1.503094 | -0.001349 |
| C                | 1.515108                | -0.261374 | 0.000355  |
| H                | 1.646086                | -0.884599 | -0.896026 |
| H                | 1.645384                | -0.882052 | 0.898614  |
| H                | 2.299742                | 0.506313  | -0.000473 |

-----

--

-----

--

3HSi-B≡N-SiH3

-----

--

| Atomic<br>Number | Coordinates (Angstroms) |           |           |
|------------------|-------------------------|-----------|-----------|
|                  | X                       | Y         | Z         |
| H                | -3.036824               | -1.121199 | -0.830333 |
| Si               | -2.539680               | 0.000018  | 0.000001  |
| H                | -3.036613               | 1.279791  | -0.555860 |
| H                | -3.036738               | -0.158414 | 1.386211  |
| B                | -0.563875               | -0.000078 | -0.000008 |
| N                | 0.698467                | -0.000077 | 0.000000  |
| Si               | 2.416126                | 0.000023  | -0.000001 |

-----

|   |          |           |           |
|---|----------|-----------|-----------|
| H | 2.923264 | 1.273086  | -0.565120 |
| H | 2.923410 | -1.125883 | -0.819895 |
| H | 2.923357 | -0.147034 | 1.385037  |

-----  
 --  
 -----  
 --  
 (SiH3)2-B≡N  
 -----  
 --

| Atomic<br>Number | Coordinates (Angstroms) |           |           |
|------------------|-------------------------|-----------|-----------|
|                  | X                       | Y         | Z         |
| B                | 0.000052                | 0.507015  | 0.000149  |
| N                | -0.000366               | 1.796012  | -0.000037 |
| Si               | -1.808343               | -0.403264 | -0.000007 |
| H                | -2.901104               | 0.587802  | 0.000195  |
| H                | -1.874180               | -1.248983 | 1.213603  |
| H                | -1.873928               | -1.248223 | -1.214166 |
| Si               | 1.808467                | -0.403091 | -0.000013 |
| H                | 1.872974                | -1.251268 | -1.211986 |
| H                | 1.875703                | -1.245614 | 1.215735  |
| H                | 2.901101                | 0.588109  | -0.003577 |

-----  
 --  
 -----  
 --  
 B≡N-(SiH3)2  
 -----  
 --

| Atomic<br>Number | Coordinates (Angstroms) |   |   |
|------------------|-------------------------|---|---|
|                  | X                       | Y | Z |

-----  
 --

|    |           |           |           |
|----|-----------|-----------|-----------|
| H  | -2.648285 | 0.663244  | -0.015805 |
| Si | -1.568750 | -0.342129 | -0.000261 |
| H  | -1.647732 | -1.184794 | 1.213586  |
| H  | -1.629616 | -1.202705 | -1.202636 |
| N  | 0.000001  | 0.509773  | 0.003068  |
| B  | 0.000614  | 1.892932  | -0.001075 |
| Si | 1.568582  | -0.342406 | -0.000238 |
| H  | 1.633170  | -1.197369 | -1.206812 |
| H  | 2.648615  | 0.663106  | -0.007518 |
| H  | 1.643121  | -1.191058 | 1.210071  |

-----  
--

-----  
--

3HSi-B≡N-SiH3-TS1

-----  
--

| Atomic<br>Number | Coordinates (Angstroms) |   |   |
|------------------|-------------------------|---|---|
|                  | X                       | Y | Z |

-----  
--

|    |           |           |           |
|----|-----------|-----------|-----------|
| B  | -0.000052 | 0.507015  | -0.000149 |
| N  | 0.000366  | 1.796012  | 0.000037  |
| Si | 1.808343  | -0.403264 | 0.000007  |
| H  | 2.901104  | 0.587802  | -0.000195 |
| H  | 1.874180  | -1.248983 | -1.213603 |
| H  | 1.873928  | -1.248223 | 1.214166  |
| Si | -1.808467 | -0.403091 | 0.000013  |
| H  | -1.872974 | -1.251268 | 1.211986  |
| H  | -1.875703 | -1.245614 | -1.215735 |
| H  | -2.901101 | 0.588109  | 0.003577  |

-----  
--

-----  
--

## 3HSi-B≡N-SiH3-TS2

```
-----
--

```

| Atomic<br>Number | Coordinates (Angstroms) |           |           |
|------------------|-------------------------|-----------|-----------|
|                  | X                       | Y         | Z         |
| B                | -0.709848               | 1.546323  | -0.000171 |
| N                | 0.194624                | 0.594497  | 0.000277  |
| Si               | -1.644383               | -0.369954 | -0.000009 |
| H                | -2.461373               | -0.334396 | -1.231138 |
| H                | -2.461407               | -0.334289 | 1.231086  |
| H                | -0.925568               | -1.673056 | 0.000025  |
| Si               | 1.752680                | -0.219319 | -0.000038 |
| H                | 1.861019                | -1.063800 | -1.207780 |
| H                | 1.861928                | -1.063063 | 1.208137  |
| H                | 2.796117                | 0.825335  | -0.000744 |

```
-----
-----
```

## b97d3/LANL2DZ+dp

```
-----
--

```

SiMe(SitBu<sub>3</sub>)<sub>2</sub>-Al≡N-SiMe(SitBu<sub>3</sub>)<sub>2</sub>

```
-----
--

```

| Atomic<br>Number | Coordinates (Angstroms) |           |           |
|------------------|-------------------------|-----------|-----------|
|                  | X                       | Y         | Z         |
| Al               | -0.5C4C44               | 0.H0C079  | -0.03382C |
| N                | H.HSiH25                | 0.0035H9  | 0.0870CH  |
| Si               | 2.C90800                | 0.424078  | -0.45525H |
| Si               | 3.5330C5                | -H.558H39 | -H.CCH327 |
| Si               | 3.CC9H02                | H.C45775  | H.533835  |

|   |          |           |           |
|---|----------|-----------|-----------|
| C | 2.48H728 | H.C94389  | -H.88073C |
| H | 2.00H883 | H.H78857  | -2.72C907 |
| H | 3.4Si775 | 2.Si5080  | -2.252402 |
| H | H.80HSi8 | 2.502495  | -H.57389H |
| C | 5.297302 | -H.330730 | -2.509C28 |
| C | 5.C5CHHH | -2.4C4827 | -3.500847 |
| H | 5.C2CH57 | -3.45805H | -3.03H077 |
| H | C.C87HHH | -2.30C273 | -3.87Si78 |
| H | 4.998938 | -2.485C4C | -4.380530 |
| C | C.4SiSi5 | -H.3054C2 | -H.4448C2 |
| H | C.23CH8H | -0.542702 | -0.C80243 |
| H | 7.38089C | -H.0C80C4 | -H.927849 |
| H | C.53H745 | -2.27C045 | -0.94H877 |
| C | 5.38C49H | 0.0H0748  | -3.2793H8 |
| H | C.402994 | 0.H20507  | -3.702832 |
| H | 5.2H387H | 0.874C74  | -2.C24977 |
| H | 4.C7444C | 0.079733  | -4.HH0757 |
| C | 3.573C0C | -3.00H309 | -0.33350C |
| C | 4.2C3598 | -2.472957 | 0.94H539  |
| H | 3.799942 | -H.540Si0 | H.2835H7  |
| H | 5.334394 | -2.28HC73 | 0.794C98  |
| H | 4.HC7Si7 | -3.2HH573 | H.75952H  |
| C | 4.3H354H | -4.288554 | -0.758873 |
| H | 4.24C0Si | -5.034702 | 0.05C423  |
| H | 5.383H8C | -4.H059C4 | -0.94HH80 |
| H | 3.89058C | -4.749H93 | -H.CCH775 |
| C | 2.H27C92 | -3.3C7433 | 0.07C52H  |
| H | H.582527 | -3.880482 | -0.728Si2 |
| H | H.558C38 | -2.47HC78 | 0.3C2557  |
| H | 2.H52HHC | -4.052803 | 0.9450C5  |
| C | 2.23592H | -2.0H9085 | -3.H0429H |
| C | 2.343020 | -3.5H3073 | -3.50829C |
| H | H.C79389 | -3.C97327 | -4.37509C |
| H | 2.0H3542 | -4.H8447C | -2.7030C0 |
| H | 3.358527 | -3.8094H7 | -3.803H88 |

|   |          |           |           |
|---|----------|-----------|-----------|
| C | 0.7CC802 | -H.77C2H5 | -2.C953CC |
| H | 0.09C294 | -2.Si2825 | -3.49C878 |
| H | 0.5708HC | -0.704C7C | -2.55C230 |
| H | 0.49C288 | -2.288CH7 | -H.7C5802 |
| C | 2.45H322 | -H.H885C0 | -4.392373 |
| H | 2.4Si27H | -0.H05402 | -4.20830C |
| H | H.C44353 | -H.427C4C | -5.HHHH38 |
| H | 3.4024CC | -H.4H5908 | -4.890009 |
| C | 2.730852 | 3.40C954  | H.529C82  |
| C | 3.25535H | 0.7077HH  | 3.247H77  |
| C | 5.59C590 | H.97HCCH  | H.30945H  |
| C | C.H29209 | 3.H207H5  | 2.H95HC5  |
| H | 5.9H394C | 2.95345C  | 3.2C3H25  |
| H | 5.7H3CC3 | 4.097458  | H.9H0884  |
| H | 7.22882C | 3.H90242  | 2.0877H9  |
| C | 5.877337 | 2.32C35H  | -0.HC9408 |
| H | C.9C3H75 | 2.477988  | -0.3HC230 |
| H | 5.3C73CH | 3.238HC4  | -0.502443 |
| H | 5.570C7C | H.5H0HH7  | -0.835Si2 |
| C | C.45CH7H | 0.724488  | H.C34942  |
| H | 7.447C85 | 0.82CC42  | H.H5C724  |
| H | C.007977 | -0.2095HC | H.2759H8  |
| H | C.C27424 | 0.CH733C  | 2.7H2578  |
| C | H.984900 | -0.H55057 | 3.092924  |
| H | 2.HH5909 | -0.98H239 | 2.3850C8  |
| H | H.H3H835 | 0.4292C9  | 2.727408  |
| H | H.7H7C29 | -0.585880 | 4.07C797  |
| C | 4.377579 | -0.223598 | 3.7C9334  |
| H | 4.74C207 | -0.939745 | 3.027330  |
| H | 3.97C233 | -0.808883 | 4.CH844C  |
| H | 5.235C32 | 0.347CC5  | 4.H529H5  |
| C | 2.974972 | H.C8C095  | 4.4H39HH  |
| H | 2.037453 | 2.24H355  | 4.274274  |
| H | 3.789222 | 2.408C22  | 4.573878  |
| H | 2.8C3434 | H.099402  | 5.345CH7  |

|    |           |           |           |
|----|-----------|-----------|-----------|
| C  | H.208008  | 3.HC3558  | H.4438H8  |
| H  | 0.940HC5  | 2.570H80  | 0.5C2504  |
| H  | 0.C73790  | 4.H3H730  | H.39H595  |
| H  | 0.830094  | 2.C2H777  | 2.3245C0  |
| C  | 2.95C238  | 4.347348  | 2.748954  |
| H  | 2.59002H  | 5.355300  | 2.475290  |
| H  | 2.39H805  | 4.0384C5  | 3.C35023  |
| H  | 4.009509  | 4.452985  | 3.038H03  |
| C  | 3.H5558C  | 4.25H244  | 0.300757  |
| H  | 3.H82443  | 3.C8903H  | -0.C3CH53 |
| H  | 4.SiC939  | 4.703H85  | 0.452242  |
| H  | 2.439924  | 5.085284  | 0.HC9CC4  |
| Si | -2.927573 | 0.388H20  | 0.477H74  |
| Si | -3.8H3520 | H.C88049  | -H.44HH95 |
| Si | -3.390C20 | -H.784575 | H.57H20H  |
| C  | -2.8380HH | H.752552  | H.83975C  |
| H  | -2.347820 | 2.C54283  | H.447550  |
| H  | -2.27922H | H.433327  | 2.7252CH  |
| H  | -3.8482C8 | 2.038H07  | 2.H70870  |
| C  | -2.298C43 | 2.70C053  | -2.H88740 |
| C  | -2.777H90 | 3.83H353  | -3.Si29C2 |
| H  | -H.89H958 | 4.30728H  | -3.C0383H |
| H  | -3.329424 | 4.C2H35H  | -2.CHC707 |
| H  | -3.4HH0H0 | 3.458080  | -3.958305 |
| C  | -H.352433 | H.802809  | -3.0HH3C4 |
| H  | -0.99C4H2 | 0.923304  | -2.447HCH |
| H  | -0.45H04C | 2.372508  | -3.29CH82 |
| H  | -H.8HC508 | H.4322H8  | -3.9352C8 |
| C  | -H.435838 | 3.37330H  | -H.09539C |
| H  | -0.CH389C | 3.940798  | -H.5CC398 |
| H  | -0.954704 | 2.C37C09  | -0.432582 |
| H  | -H.999039 | 4.0C7373  | -0.45993C |
| C  | -4.533293 | 0.479538  | -2.794898 |
| C  | -3.570528 | -0.7HH2CH | -2.993C25 |
| H  | -2.C22C95 | -0.42207C | -3.4C3440 |



|   |           |           |           |
|---|-----------|-----------|-----------|
| H | -4.04325C | -H.47H930 | -3.C4H223 |
| H | -3.33575H | -H.H98828 | -2.042399 |
| C | -4.758499 | H.H23HH7  | -4.H84H95 |
| H | -3.8H77C2 | H.452007  | -4.C470H8 |
| H | -5.44339C | H.98H502  | -4.H5783C |
| H | -5.203590 | 0.3C7874  | -4.858453 |
| C | -5.88C2H0 | -0.0974CH | -2.3HC479 |
| H | -C.C8274H | 0.C5948C  | -2.303420 |
| H | -5.8H7222 | -0.528572 | -H.309780 |
| H | -C.20988H | -0.902H00 | -3.0023CH |
| C | -5.H88HSi | 2.945925  | -0.797C37 |
| C | -C.0395H7 | 3.495593  | -H.97H823 |
| H | -C.75C935 | 4.23CH84  | -H.57H908 |
| H | -C.C28875 | 2.7H0807  | -2.4C500C |
| H | -5.43755C | 4.0038H7  | -2.73C725 |
| C | -C.HC89H5 | 2.28H22H  | 0.H94745  |
| H | -C.92483H | 3.0247H8  | 0.509329  |
| H | -5.CC4325 | H.930548  | H.H053C2  |
| H | -C.7H0497 | H.434HCC  | -0.244C40 |
| C | -4.592424 | 4.H744C9  | -0.0C4C29 |
| H | -3.97C24H | 4.802859  | -0.720702 |
| H | -3.990H99 | 3.8980C4  | 0.8099H8  |
| H | -5.423859 | 4.807H34  | 0.297772  |
| C | -2.0H87HC | -2.0592C2 | 2.97329C  |
| C | -5.H74H85 | -H.CC988H | 2.3755H9  |
| C | -3.280422 | -3.258057 | 0.283C95  |
| C | -3.20HC5H | -4.C45580 | 0.97Si38  |
| H | -4.05HC89 | -4.8330H0 | H.C42Si4  |
| H | -2.27CC50 | -4.785443 | H.545C82  |
| H | -3.2H9089 | -5.428C43 | 0.H90877  |
| C | -2.0270Si | -3.H27523 | -0.CH5723 |
| H | -2.037892 | -3.9H7288 | -H.389020 |
| H | -H.09HHH2 | -3.23C225 | -0.05578C |
| H | -H.983388 | -2.HC8307 | -H.H50570 |
| C | -4.528090 | -3.298Si3 | -0.C29C84 |

|   |           |           |           |
|---|-----------|-----------|-----------|
| H | -5.42SiCH | -3.C27C32 | -0.080347 |
| H | -4.3C09C7 | -4.022974 | -H.447095 |
| H | -4.754985 | -2.33SiC0 | -H.09H395 |
| C | -C.H92H5H | -H.H27HHH | H.35037H  |
| H | -5.8547HH | -0.H8C090 | 0.903839  |
| H | -7.H55408 | -0.925753 | H.854CHC  |
| H | -C.38939H | -H.8377H2 | 0.538H85  |
| C | -5.728CC5 | -3.023947 | 2.88223H  |
| H | -5.870C9H | -3.743H9C | 2.0C258C  |
| H | -C.722305 | -2.852794 | 3.337057  |
| H | -5.09CHC3 | -3.495793 | 3.C44725  |
| C | -5.HC5330 | -0.C7C887 | 3.5C33C8  |
| H | -4.8H7800 | 0.323345  | 3.2CCH84  |
| H | -4.538H02 | -H.0H9352 | 4.397422  |
| H | -C.H9493H | -0.5C5494 | 3.950C82  |
| C | -2.5HC7Si | -3.095250 | 4.0Si839  |
| H | -H.C90339 | -3.3Si20H | 4.7H58H3  |
| H | -2.825C20 | -4.047789 | 3.5C4297  |
| H | -3.353752 | -2.7HHC20 | 4.CSi037  |
| C | -0.C78527 | -2.5888C7 | 2.4Si7C9  |
| H | -0.7C0359 | -3.58CC48 | H.9C7C78  |
| H | 0.049474  | -2.CC2333 | 3.24SiCH  |
| H | -0.2222H7 | -H.9HC994 | H.C7230H  |
| C | -H.CC5580 | -0.7725C8 | 3.7545H5  |
| H | -H.079749 | -0.077030 | 3.H38C20  |
| H | -2.545322 | -0.243578 | 4.Si23H5  |
| H | -H.02CC3C | -H.039523 | 4.CSi895  |

-----

--

-----

--

[SiMe(SitBu<sub>3</sub>)<sub>2</sub>]<sub>2</sub>-Al=N

-----

--

Atomic

Coordinates (Angstroms)

| Number | X         | Y         | Z         |
|--------|-----------|-----------|-----------|
| --     |           |           |           |
| Al     | 0.0037H2  | 0.072433  | -0.800593 |
| N      | 0.05C2Si  | 0.H32HH0  | -2.C75Si2 |
| Si     | 2.325CC7  | -0.HH7CH7 | 0.300C27  |
| Si     | -2.28CHCC | 0.H34H87  | 0.437C4C  |
| Si     | 3.C8H274  | -H.97C292 | -H.003423 |
| Si     | 3.37C53H  | 2.2794H2  | H.022C04  |
| Si     | -3.334243 | -2.H93777 | H.083H77  |
| Si     | -3.7C5549 | H.88C494  | -0.99780C |
| C      | 2.2502C8  | -H.050C33 | 2.02240C  |
| H      | 3.245892  | -H.0C7C43 | 2.5Si9C9  |
| H      | H.9C0947  | -2.H07H22 | H.859SiC  |
| H      | H.532C07  | -0.C30039 | 2.75HHC0  |
| C      | -2.040738 | H.07HH80  | 2.H37542  |
| H      | -H.HC5444 | 0.C5C833  | 2.C85790  |
| H      | -2.920787 | 0.983HHC  | 2.80C739  |
| H      | -H.844H07 | 2.Si8590  | H.987Si0  |
| C      | 4.C809C5  | -H.2H024C | -2.500C99 |
| C      | 4.9H35CH  | -2.99H945 | 0.22HH83  |
| C      | 2.3233HC  | -3.224877 | -H.C53478 |
| C      | 3.5555C3  | 3.50594C  | -0.525493 |
| C      | 5.H07CSi  | 2.HH2HCC  | H.9737CH  |
| C      | 2.008533  | 3.00999C  | 2.2C0258  |
| C      | -4.42993H | H.HH2790  | -2.C7C59H |
| C      | -2.504445 | 3.3H7570  | -H.409C50 |
| C      | -5.2C377H | 2.C47327  | 0.059554  |
| C      | -3.038483 | -3.397C55 | -0.487259 |
| C      | -5.2235CC | -2.H00382 | H.705579  |
| C      | -2.22207C | -2.795HHC | 2.C2HC54  |
| C      | 2.978H37  | -4.580920 | -2.0C0735 |
| H      | 3.4H7543  | -5.H03508 | -H.20C420 |
| H      | 3.752H58  | -4.4C9299 | -2.824H05 |
| H      | 2.H985C3  | -5.23CCC5 | -2.4747HH |

|   |          |           |           |
|---|----------|-----------|-----------|
| C | H.539345 | -2.77924H | -2.9HHH89 |
| H | 2.H97909 | -2.725470 | -3.77C048 |
| H | H.02H57H | -H.8294H0 | -2.849H57 |
| H | 0.78970H | -3.543957 | -3.HH9878 |
| C | H.302H29 | -3.57H5C5 | -0.555H2C |
| H | H.7554C5 | -4.07C0Si | 0.30C3H0  |
| H | 0.5370C0 | -4.239544 | -0.9C9738 |
| H | 0.798H29 | -2.C78449 | -0.HC3028 |
| C | 5.09237C | -2.245502 | -3.577C92 |
| H | 5.729388 | -3.044C08 | -3.H7983C |
| H | 5.CC7902 | -H.724533 | -4.3C2733 |
| H | 4.22834H | -2.7050C0 | -4.0C7205 |
| C | 3.783880 | -0.H54373 | -3.H9H853 |
| H | 4.34807H | 0.330H9C  | -4.00C7CC |
| H | 3.475294 | 0.C3HC98  | -2.494725 |
| H | 2.877933 | -0.5829HH | -3.C243H0 |
| C | 5.9CC058 | -0.49730H | -2.03C745 |
| H | C.7H7C7C | -H.H94994 | -H.C38833 |
| H | 5.7C4C47 | 0.25C2C2  | -H.2CC055 |
| H | C.425480 | 0.024308  | -2.89CC94 |
| C | 5.940909 | -3.825H33 | -0.59H2H2 |
| H | C.575039 | -4.3909C5 | 0.HH8999  |
| H | C.CH3540 | -3.H89C52 | -H.H83708 |
| H | 5.478499 | -4.55450H | -H.2CC237 |
| C | 5.742884 | -2.053H53 | H.HH897C  |
| H | C.398280 | -2.C58H05 | H.778C7C  |
| H | 5.H08359 | -H.430590 | H.772H24  |
| H | C.397C34 | -H.388582 | 0.538833  |
| C | 4.H90775 | -3.9C3979 | H.H85783  |
| H | 4.94CC05 | -4.4H93CC | H.85C37H  |
| H | 3.C85045 | -4.792340 | 0.C73439  |
| H | 3.455475 | -3.453900 | H.82C842  |
| C | 4.80727C | 3.H5207H  | -H.3C0349 |
| H | 5.7443C0 | 3.348352  | -0.8H7CC9 |
| H | 4.82H82H | 3.77038H  | -2.275809 |

|   |           |           |           |
|---|-----------|-----------|-----------|
| H | 4.80479C  | 2.H0H320  | -H.C8040C |
| C | 2.3204H5  | 3.3C4248  | -H.4C4434 |
| H | 2.02C375  | 2.323022  | -H.C35953 |
| H | 2.54C234  | 3.8052H3  | -2.445040 |
| H | H.4529C0  | 3.889C3C  | -H.0C5534 |
| C | 3.C54759  | 4.99CCC0  | -0.H27348 |
| H | 4.494842  | 5.20CC97  | 0.55H205  |
| H | 2.732523  | 5.3587H8  | 0.3484C8  |
| H | 3.80C052  | 5.C00H29  | -H.04H289 |
| C | 0.747983  | 3.4H0757  | H.4CH33H  |
| H | 0.3307C8  | 2.549H7C  | 0.9H8599  |
| H | 0.9H09C5  | 4.23CH89  | 0.758878  |
| H | -0.03C9Si | 3.747323  | 2.HC9953  |
| C | 2.52239C  | 4.233302  | 3.05452C  |
| H | 3.2739H3  | 3.9374C8  | 3.80708H  |
| H | H.C7CH2C  | 4.C92593  | 3.C0CH57  |
| H | 2.9C770C  | 5.0H3H22  | 2.4H897H  |
| C | H.5094H9  | H.9C4908  | 3.28HC55  |
| H | 2.3H3205  | H.4C4H94  | 3.8489C0  |
| H | 0.909C48  | H.H88C92  | 2.7C9839  |
| H | 0.833789  | 2.455770  | 4.0H5782  |
| C | C.0CH505  | H.25800H  | H.HH9C3H  |
| H | C.9SiC57  | 0.889943  | H.727078  |
| H | C.47849H  | H.8HCC72  | 0.2C7838  |
| H | 5.53387H  | 0.38Si72  | 0.724H77  |
| C | 4.904335  | H.393709  | 3.3300C9  |
| H | 5.89H28C  | H.H924C0  | 3.799859  |
| H | 4.388C72  | 0.42044C  | 3.2H9702  |
| H | 4.322Si5  | 2.002337  | 4.045595  |
| C | 5.795994  | 3.47HC28  | 2.243C45  |
| H | C.74C3C5  | 3.289842  | 2.789234  |
| H | 5.H87H35  | 4.H52249  | 2.8C02CC  |
| H | C.055C7C  | 3.993920  | H.307C53  |
| C | -2.32272C | -4.7H5H3H | -0.HSi838 |
| H | -H.333959 | -4.554839 | 0.329SiC  |

|   |           |           |           |
|---|-----------|-----------|-----------|
| H | -2.H7C372 | -5.308348 | -H.034H07 |
| H | -2.92SiC2 | -5.32C09H | 0.57C288  |
| C | -4.357H74 | -3.83C3C3 | -H.H72C35 |
| H | -4.HSiH2H | -4.50H23C | -2.020790 |
| H | -4.934H79 | -2.995H82 | -H.575729 |
| H | -5.004HC4 | -4.407429 | -0.487838 |
| C | -2.H8930H | -2.C85808 | -H.57H388 |
| H | -H.258049 | -2.2C5904 | -H.H89C38 |
| H | -2.747H22 | -H.877C3C | -2.04898H |
| H | -H.925447 | -3.404980 | -2.35C088 |
| C | -5.C2C845 | -3.3CC5CH | 2.49H9H2  |
| H | -5.0C9H87 | -3.472959 | 3.43C550  |
| H | -5.477H27 | -4.28CH9C | H.897Si0  |
| H | -C.705CC4 | -3.3H244H | 2.748C54  |
| C | -C.227885 | -H.935HC8 | 0.54H582  |
| H | -C.433025 | -2.884343 | 0.027202  |
| H | -5.87549C | -H.2HC525 | -0.20C728 |
| H | -7.H95C0C | -H.5CH9C7 | 0.934453  |
| C | -5.3750C8 | -0.8573C0 | 2.CH588H  |
| H | -4.833352 | -0.943383 | 3.57H570  |
| H | -C.445C7H | -0.C88HC4 | 2.857499  |
| H | -5.0H0430 | 0.05H242  | 2.H075C5  |
| C | -2.3393C9 | -4.300H35 | 2.995C05  |
| H | -H.7Si054 | -4.94HC5H | 2.3C0487  |
| H | -3.370258 | -4.C84CH7 | 2.9520H3  |
| H | -H.984C93 | -4.438CH5 | 4.037434  |
| C | -0.74C950 | -2.492444 | 2.302350  |
| H | -0.092322 | -2.83H5C3 | 3.H342Si  |
| H | -0.5CC87C | -H.4082C4 | 2.HC4978  |
| H | -0.400944 | -2.999H7C | H.390035  |
| C | -2.5C4587 | -2.003952 | 3.9H075H  |
| H | -H.799753 | -2.22732C | 4.C8C248  |
| H | -3.540739 | -2.299449 | 4.334085  |
| H | -2.57040H | -0.909970 | 3.7C3907  |
| C | -5.097390 | -0.25H557 | -2.4H2808 |

|   |           |           |           |
|---|-----------|-----------|-----------|
| H | -4.452748 | -0.9059C9 | -H.8H3007 |
| H | -5.294C0C | -0.7CC787 | -3.370399 |
| H | -C.059C0H | -0.H5098H | -H.892H05 |
| C | -5.474850 | H.993909  | -3.407CCH |
| H | -5.759H94 | H.49C494  | -4.3534CH |
| H | -5.0924CC | 2.989389  | -3.CC4HC5 |
| H | -C.395H84 | 2.H2H3C4  | -2.8H9042 |
| C | -3.2C5743 | 0.84CH00  | -3.C707C2 |
| H | -2.4H2974 | 0.309H97  | -3.230590 |
| H | -2.88H5HC | H.774032  | -4.H0947H |
| H | -3.C45C22 | 0.2347H8  | -4.508H09 |
| C | -C.445522 | H.C55C73  | 0.H0C8H7  |
| H | -C.H2582H | 0.CC8935  | 0.4C40H2  |
| H | -C.928472 | H.524C87  | -0.8740H5 |
| H | -7.22H0H8 | 2.027030  | 0.80722C  |
| C | -5.805048 | 3.9803H8  | -0.5HC702 |
| H | -5.08237H | 4.8039C8  | -0.4324C2 |
| H | -C.700C23 | 4.2770C5  | 0.0C4902  |
| H | -C.HH3805 | 3.89933C  | -H.5C8HC8 |
| C | -4.84HH58 | 2.9Si04C  | H.522H8H  |
| H | -4.5C7H08 | H.984HC8  | 2.044C49  |
| H | -5.C899CC | 3.3C4245  | 2.077045  |
| H | -3.988C95 | 3.C04C40  | H.C0C5H5  |
| C | -3.035HH8 | 4.2499C7  | -2.53C8C4 |
| H | -3.0C803C | 3.75309C  | -3.509889 |
| H | -2.352075 | 5.H07707  | -2.C3542C |
| H | -4.03H034 | 4.C50453  | -2.32447C |
| C | -2.2HC820 | 4.232893  | -0.20407H |
| H | -H.87CC53 | 3.C84H95  | 0.C8230H  |
| H | -3.09990C | 4.8H9895  | 0.079SiC  |
| H | -H.4224H9 | 4.947225  | -0.473592 |
| C | -H.SiC832 | 2.7824Si  | -H.925C48 |
| H | -0.548C70 | 2.39077H  | -H.H04CCH |
| H | -0.57C004 | 3.C3H554  | -2.3H07CC |
| H | -H.2HH770 | 2.048908  | -2.7H5798 |

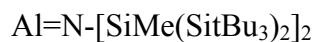

| Atomic<br>Number | Coordinates (Angstroms) |           |           |
|------------------|-------------------------|-----------|-----------|
|                  | X                       | Y         | Z         |
| Al               | -0.H9887H               | H.229579  | H.205543  |
| N                | 0.028249                | -0.0C2483 | -0.298243 |
| Si               | H.8080H0                | -0.4433C9 | -0.42CH85 |
| Si               | 2.804479                | -H.59309C | H.97407C  |
| Si               | 3.SiSi23                | H.5H93H7  | -H.839H95 |
| C                | 2.2H2899                | -H.905733 | -H.55C52H |
| H                | H.78293C                | -2.84522H | -H.H97279 |
| H                | 3.30C839                | -2.0HHC89 | -H.5288HH |
| H                | H.9HCC37                | -H.759245 | -2.C00H93 |
| C                | 4.H580C0                | -3.02C9C5 | H.C09H93  |
| C                | 4.45Si33                | -3.837959 | 2.90H538  |
| H                | 4.7C9522                | -3.2H507H | 3.74C458  |
| H                | 5.275354                | -4.5445Si | 2.C8C92C  |
| H                | 3.59H038                | -4.438C4C | 3.22H940  |
| C                | 5.5HH258                | -2.4CH759 | H.H25C94  |
| H                | 5.4H73C8                | -H.95828H | 0.H573H5  |
| H                | C.22288C                | -3.297598 | 0.987022  |
| H                | 5.970555                | -H.7C00H3 | H.834737  |
| C                | 3.72CH72                | -4.05909C | 0.535957  |
| H                | 4.42Si5H                | -4.9H885H | 0.572534  |
| H                | 3.78C2C2                | -3.C4437C | -0.47CH84 |
| H                | 2.7H2H30                | -4.45HC52 | 0.C80830  |
| C                | 3.C37H22                | -0.HC5CC3 | 3.044HC2  |
| C                | 4.4339HH                | 0.73005H  | 2.083325  |



|   |           |           |           |
|---|-----------|-----------|-----------|
| H | 3.7755CH  | H.HHHH93  | H.293559  |
| H | 5.2CC973  | 0.205405  | H.598498  |
| H | 4.852737  | H.5952C2  | 2.C302H2  |
| C | 4.598455  | -0.C54407 | 4.H53C24  |
| H | 4.99H93H  | 0.225909  | 4.C9C433  |
| H | 5.4C47H0  | -H.H959C9 | 3.749254  |
| H | 4.H037C7  | -H.29992H | 4.892C8C  |
| C | 2.590285  | 0.7509CH  | 3.7H7948  |
| H | 2.027907  | 0.247824  | 4.5HC47C  |
| H | H.8C3297  | H.H55775  | 2.992793  |
| H | 3.H07498  | H.CH50C8  | 4.H7535H  |
| C | H.35H842  | -2.4H5904 | 3.03457C  |
| C | H.725902  | -2.C3280C | 4.52332H  |
| H | 0.87800C  | -3.H35850 | 5.02C37H  |
| H | H.8979HH  | -H.C8783H | 5.055844  |
| H | 2.CH0474  | -3.2CCCH3 | 4.CC0955  |
| C | 0.H04405  | -H.5H2C42 | 3.02098H  |
| H | -0.700C7H | -H.9C99H2 | 3.C24H03  |
| H | -0.28HC40 | -H.3800C0 | 2.0023H5  |
| H | 0.3H0H78  | -0.523845 | 3.450854  |
| C | 0.9302C9  | -3.787934 | 2.4C4C45  |
| H | 0.7HH202  | -3.740853 | H.3924H9  |
| H | 0.0Si32H  | -4.H359HC | 2.977452  |
| H | H.C9785H  | -4.557578 | 2.CH8055  |
| C | H.9H9794  | H.835394  | -3.3437C5 |
| C | 3.494252  | 3.23CH94  | -0.903735 |
| C | 4.84C050  | 0.8H7749  | -2.532C38 |
| C | 5.7037H8  | H.90H742  | -3.234093 |
| H | 5.952555  | 2.747289  | -2.58H225 |
| H | 5.220H8H  | 2.30030H  | -4.H3C283 |
| H | C.CCH253  | H.44392H  | -3.54935C |
| C | 4.CC5947  | -0.3H8277 | -3.5C7403 |
| H | 5.CC4732  | -0.C93722 | -3.859884 |
| H | 4.H703CC  | 0.030C87  | -4.484H73 |
| H | 4.099025  | -H.H7H237 | -3.H7C02C |

|    |           |           |           |
|----|-----------|-----------|-----------|
| C  | 5.CC2009  | 0.24C274  | -H.35CH05 |
| H  | C.55058C  | -0.29CHC7 | -H.730778 |
| H  | 5.0CHH9H  | -0.457882 | -0.7C8CC9 |
| H  | C.0H3799  | H.027833  | -0.C70CC7 |
| C  | 2.372805  | 3.5HSi8C  | 0.H20747  |
| H  | 2.378708  | 2.78025H  | 0.942802  |
| H  | H.37C5C7  | 3.494754  | -0.33C009 |
| H  | 2.507998  | 4.5HH778  | 0.572887  |
| C  | 4.834494  | 3.303H52  | -0.H28259 |
| H  | 4.97CCSi  | 2.47C39H  | 0.5C9720  |
| H  | 4.848HCC  | 4.237392  | 0.4C38H9  |
| H  | 5.7058C2  | 3.337599  | -0.7953C7 |
| C  | 3.545045  | 4.438H8H  | -H.885Si5 |
| H  | 2.5934HC  | 4.C2780H  | -2.395472 |
| H  | 4.324HC4  | 4.3H7729  | -2.C508HH |
| H  | 3.788799  | 5.3509C3  | -H.309703 |
| C  | 0.72280C  | 2.C8229H  | -2.8CC390 |
| H  | 0.24C47C  | 2.223729  | -H.992559 |
| H  | -0.034703 | 2.742H27  | -3.CC8348 |
| H  | 0.99C83H  | 3.7H07C4  | -2.C05327 |
| C  | 2.5C8884  | 2.54CH50  | -4.557244 |
| H  | H.7779C2  | 2.77C804  | -5.29C555 |
| H  | 3.0C258C  | 3.49H342  | -4.299359 |
| H  | 3.30300C  | H.905337  | -5.0C7H08 |
| C  | H.332383  | 0.50793C  | -3.87234H |
| H  | 0.752842  | -0.008C80 | -3.099757 |
| H  | 2.H0H034  | -0.H82780 | -4.242H0C |
| H  | 0.C4CC74  | 0.722309  | -4.7H3040 |
| Si | -H.C244H2 | -0.2H5987 | -0.920775 |
| Si | -2.8843CH | -2.423578 | -H.27CSi9 |
| Si | -2.93C787 | 2.440HH0  | H.2044HC  |
| C  | -H.970C90 | 0.732Si2  | -2.5302H3 |
| H  | -H.38C200 | 0.328478  | -3.3708C2 |
| H  | -H.754095 | H.8025H5  | -2.4503C4 |
| H  | -3.034C28 | 0.CH8908  | -2.780HH7 |

|   |           |           |           |
|---|-----------|-----------|-----------|
| C | -H.478982 | -3.C08235 | -H.943H9C |
| C | -H.9C4029 | -4.95500C | -2.52CH35 |
| H | -H.08H92C | -5.572434 | -2.78H052 |
| H | -2.5428CC | -4.8244CH | -3.45Si25 |
| H | -2.574989 | -5.533839 | -H.8H9433 |
| C | -0.534C57 | -3.9H2477 | -0.7CC8C4 |
| H | -0.H89477 | -2.98C045 | -0.288H33 |
| H | 0.354H23  | -4.4C2482 | -H.H2C07C |
| H | -H.0H0830 | -4.537202 | -0.000539 |
| C | -0.C45C0H | -2.898984 | -3.03430H |
| H | 0.227342  | -3.523753 | -3.2947H5 |
| H | -0.25944H | -H.933094 | -2.C85434 |
| H | -H.209788 | -2.720CH9 | -3.95C934 |
| C | -3.C3422H | -3.0CC388 | 0.4H57C7  |
| C | -2.C94H84 | -2.CC5C45 | H.5C9C0H  |
| H | -H.707524 | -3.H33774 | H.4958H7  |
| H | -3.H34HH9 | -2.972C4H | 2.53C745  |
| H | -2.548044 | -H.575C72 | H.C0H79H  |
| C | -3.828H25 | -4.C0H702 | 0.4C0358  |
| H | -2.883289 | -5.H5388C | 0.3C3H7C  |
| H | -4.5HCH52 | -4.9C4Si2 | -0.3HCC93 |
| H | -4.2C4300 | -4.877259 | H.438843  |
| C | -5.002H98 | -2.424053 | 0.733909  |
| H | -5.785297 | -2.C99095 | 0.0SiCHH  |
| H | -4.938254 | -H.332090 | 0.773SiC  |
| H | -5.3377C3 | -2.7C9544 | H.7297C4  |
| C | -4.295H3C | -2.28Si43 | -2.C54C8H |
| C | -5.SiH990 | -3.582578 | -2.C52CH2 |
| H | -5.8CH970 | -3.537797 | -3.49H3H9 |
| H | -5.728483 | -3.C95583 | -H.730737 |
| H | -4.54H33C | -4.49H308 | -2.785H5C |
| C | -5.28C9C2 | -H.HH59C4 | -2.453H34 |
| H | -C.059448 | -H.HC7744 | -3.24299C |
| H | -4.80CC35 | -0.H32848 | -2.537H98 |
| H | -5.804H25 | -H.H55C59 | -H.488324 |

|   |           |           |           |
|---|-----------|-----------|-----------|
| C | -3.7H2H90 | -2.HH8H89 | -4.078C9H |
| H | -3.HC855H | -3.0H088H | -4.4H5329 |
| H | -3.04H358 | -H.252H95 | -4.HC4C4C |
| H | -4.544849 | -H.9C2539 | -4.789C07 |
| C | -2.052348 | 4.22H272  | H.0047HH  |
| C | -4.C53C48 | 2.504297  | 0.2HH077  |
| C | -3.3H3475 | 2.044394  | 3.HH8C0H  |
| C | -3.899833 | 3.279C75  | 3.85HHC5  |
| H | -4.803C8H | 3.C77734  | 3.372787  |
| H | -3.HC9CHH | 4.097CH5  | 3.927092  |
| H | -4.H7H555 | 2.99H0H5  | 4.884434  |
| C | -2.05H903 | H.CH8H99  | 3.90H8CC  |
| H | -2.3H5535 | H.47C3C5  | 4.9C7334  |
| H | -H.24H955 | 2.358882  | 3.8548C0  |
| H | -H.C5C882 | 0.C5C58H  | 3.538794  |
| C | -4.3H7H8C | 0.87589H  | 3.2C5055  |
| H | -5.32888C | H.Si55C8  | 2.933530  |
| H | -4.39H7C0 | 0.590047  | 4.330889  |
| H | -3.99C73C | -0.0H5329 | 2.70483C  |
| C | -5.203225 | H.08H22H  | 0.03C429  |
| H | -4.434C28 | 0.4HHC47  | -0.3C8H00 |
| H | -C.05C492 | H.089530  | -0.CC440C |
| H | -5.5CSiCH | 0.C54920  | 0.9803C0  |
| C | -5.7587H9 | 3.325782  | 0.924H53  |
| H | -C.043994 | 2.884372  | H.8888C0  |
| H | -C.CC4553 | 3.322744  | 0.287904  |
| H | -5.4823C5 | 4.373980  | H.094CCH  |
| C | -4.48H5C7 | 3.08905C  | -H.2HH234 |
| H | -3.72283H | 2.552Si5  | -H.793C28 |
| H | -4.2H800H | 4.H55Si5  | -H.207287 |
| H | -5.44H053 | 2.994848  | -H.753489 |
| C | -3.0479HH | 5.405024  | H.08C420  |
| H | -2.48707H | C.352994  | 0.980400  |
| H | -3.57520H | 5.442H5H  | 2.050340  |
| H | -3.798045 | 5.384385  | 0.28C524  |

|   |           |          |           |
|---|-----------|----------|-----------|
| C | -0.9CC589 | 4.49CC20 | 2.07H303  |
| H | -H.3844Si | 4.5C8349 | 3.085405  |
| H | -0.475470 | 5.4CH29H | H.8445C3  |
| H | -0.H79957 | 3.725900 | 2.085H7H  |
| C | -H.3C3H33 | 4.2C8C45 | -0.37C8C5 |
| H | -0.C43H23 | 3.44C444 | -0.492948 |
| H | -2.072908 | 4.H98759 | -H.2HH372 |
| H | -0.798783 | 5.2H2523 | -0.492258 |

-----  
--  
-----  
--

*Si*PrDis<sub>2</sub>-Al≡N-*Si*PrDis<sub>2</sub>

-----  
--

| Atomic<br>Number | Coordinates (Angstroms) |           |           |
|------------------|-------------------------|-----------|-----------|
|                  | X                       | Y         | Z         |
| Al               | -0.355893               | 0.28C52C  | -0.H75499 |
| N                | H.27HC23                | -0.H34H34 | -0.H72CC9 |
| Si               | 2.8H2507                | -0.343987 | 0.54H083  |
| Si               | -2.C78835               | -0.305H90 | -0.C7052H |
| C                | 3.C35Si7                | H.38CH00  | 0.C84347  |
| H                | 4.72737C                | H.225739  | 0.C5C383  |
| C                | 3.8755H5                | -H.C27C42 | -0.453209 |
| H                | 3.98238H                | -2.42C9H2 | 0.3HH808  |
| C                | 2.5H753H                | -H.37H73C | 2.H58H82  |
| H                | 2.054438                | -2.2C3470 | H.C89347  |
| C                | H.4C3544                | -0.830CH0 | 3.H37H9H  |
| H                | H.HC8398                | -H.C0874H | 3.8C4C7C  |
| H                | 0.552543                | -0.5H2330 | 2.C0395C  |
| H                | H.82H93C                | 0.032082  | 3.7Si923  |
| C                | 3.7CC809                | -H.877998 | 2.9H0H02  |
| H                | 3.4753HC                | -2.50CH57 | 3.772089  |

|    |           |           |           |
|----|-----------|-----------|-----------|
| H  | 4.3883C2  | -H.0592C0 | 3.29C877  |
| H  | 4.4H284H  | -2.495C04 | 2.2CC700  |
| C  | -2.4C3H59 | -H.3988H2 | -2.237009 |
| H  | -H.9203H9 | -2.29H984 | -H.890H25 |
| C  | -H.CH9492 | -0.75C453 | -3.35H849 |
| H  | -H.483527 | -H.4CC8H3 | -4.H85749 |
| H  | -0.CH55H8 | -0.4C7943 | -3.0054C5 |
| H  | -2.H05885 | 0.SiHC74  | -3.7C30C0 |
| C  | -3.8252C4 | -H.8434H0 | -2.8HHHC5 |
| H  | -3.C78323 | -2.5C045C | -3.C38022 |
| H  | -4.382399 | -0.984929 | -3.2228Si |
| H  | -4.4C8C48 | -2.32553C | -2.0C3H24 |
| C  | -3.008H8C | -H.447C20 | 0.8C5CC3  |
| H  | -H.949400 | -H.7579H9 | H.032H72  |
| C  | -3.700958 | H.22H934  | -H.22CC58 |
| H  | -3.835595 | 0.953477  | -2.297455 |
| Si | 2.8C4C75  | -2.CH25H7 | -H.73HSi2 |
| Si | 5.7Si792  | -H.3H3584 | -0.787585 |
| Si | 3.39253C  | 2.3C0040  | 2.294H52  |
| Si | 3.3H7472  | 2.507885  | -0.829257 |
| C  | 3.8H8795  | -4.H05472 | -2.405CHH |
| H  | 3.H08824  | -4.7C2499 | -2.939C58 |
| H  | 4.290473  | -4.704Si5 | -H.C09844 |
| H  | 4.C03872  | -3.8200CH | -3.H23442 |
| C  | H.34Si90  | -3.37C873 | -0.902229 |
| H  | 0.755599  | -3.942784 | -H.C48HC9 |
| H  | 0.700388  | -2.598CSi | -0.4C4340 |
| H  | H.C28C98  | -4.082357 | -0.H03002 |
| C  | 2.298378  | -H.C58389 | -3.25H9C0 |
| H  | H.77HC9C  | -2.347990 | -3.935500 |
| H  | 3.Si37C5  | -H.22H592 | -3.8079C7 |
| H  | H.CH2549  | -0.844375 | -2.98C520 |
| C  | C.C4C320  | -2.928533 | -H.H3H982 |
| H  | C.47H808  | -3.32C827 | -2.Si20H5 |
| H  | C.382H0H  | -3.720077 | -0.4H0227 |

|    |           |           |           |
|----|-----------|-----------|-----------|
| H  | 7.730272  | -2.740957 | -H.032903 |
| C  | C.CH0054  | -0.C47850 | 0.74849H  |
| H  | 7.C95C0H  | -0.C32H70 | 0.545043  |
| H  | C.450H84  | -H.3095HH | H.CH5827  |
| H  | C.324043  | 0.3C85CC  | H.05432C  |
| C  | C.074908  | -0.HC7C88 | -2.242058 |
| H  | 5.7409H7  | 0.8C509H  | -2.070477 |
| H  | 5.592474  | -0.527592 | -3.HCC594 |
| H  | 7.HC3375  | -0.H38H93 | -2.4259C4 |
| C  | 4.2HC02H  | 4.0C7H0H  | 2.227257  |
| H  | 4.HHC494  | 4.5452HH  | 3.2H8084  |
| H  | 3.775355  | 4.749H93  | H.48547C  |
| H  | 5.29428H  | 3.98357C  | 2.0H0230  |
| C  | 4.2C3H50  | H.55887C  | 3.7708C5  |
| H  | 4.353Si0  | 2.3082C3  | 4.577H89  |
| H  | 5.2850C9  | H.240C3C  | 3.503303  |
| H  | 3.740430  | 0.C88808  | 4.H8720C  |
| C  | H.5CH25H  | 2.C4HH83  | 2.C97530  |
| H  | H.407089  | 2.72SiH3  | 3.787H53  |
| H  | 0.93283C  | H.8HC9C9  | 2.33052C  |
| H  | H.H92028  | 3.57H2H5  | 2.2383H5  |
| C  | H.8C2847  | 3.C97230  | -0.588985 |
| H  | 0.943873  | 3.Si78H8  | -0.335243 |
| H  | H.C7C778  | 4.23298C  | -H.535978 |
| H  | 2.0284C5  | 4.45H959  | 0.H93442  |
| C  | 4.875C27  | 3.544074  | -H.Si2585 |
| H  | 4.998H07  | 4.35C780  | -0.4H09H2 |
| H  | 4.83H72H  | 4.00H397  | -2.SiCC38 |
| H  | 5.790220  | 2.9283C2  | -H.H02C32 |
| C  | 2.9257C0  | H.C33039  | -2.448588 |
| H  | H.9H82C0  | H.200498  | -2.4H222C |
| H  | 3.C2Si95  | 0.822400  | -2.C92840 |
| H  | 2.9C4999  | 2.37H024  | -3.2C9742 |
| Si | -3.7HC029 | -3.23C009 | 0.753499  |
| Si | -3.345430 | -0.587792 | 2.545539  |

|    |           |           |           |
|----|-----------|-----------|-----------|
| Si | -2.733802 | 2.8C5422  | -H.423SiH |
| Si | -5.52CSi9 | H.4287H9  | -0.7H738H |
| C  | -2.733C3C | -4.302547 | -0.457902 |
| H  | -2.94C858 | -5.3C2000 | -0.23H74C |
| H  | -H.C4C4H2 | -4.H57039 | -0.34830H |
| H  | -2.995458 | -4.H3CSi4 | -H.5H22H7 |
| C  | -3.4C3HC2 | -4.088975 | 2.422454  |
| H  | -3.7473C5 | -5.Si9745 | 2.307889  |
| H  | -4.08C042 | -3.CC87H5 | 3.22CH32  |
| H  | -2.4H38C9 | -4.0C20H0 | 2.7554HC  |
| C  | -5.55H34C | -3.4545H3 | 0.37H789  |
| H  | -5.7C55HC | -4.53C98C | 0.427229  |
| H  | -5.854924 | -3.HHHH77 | -0.C27038 |
| H  | -C.H99238 | -2.955CH2 | H.H08954  |
| C  | -2.324342 | -H.375509 | 3.9304H5  |
| H  | -2.833CH0 | -2.2HC770 | 4.422H24  |
| H  | -2.H2372C | -0.CHH53C | 4.70H545  |
| H  | -H.3475H7 | -H.735440 | 3.572422  |
| C  | -2.7C7093 | H.202782  | 2.4977H9  |
| H  | -3.059282 | H.7H5H38  | 3.430535  |
| H  | -3.H84H9H | H.773CH8  | H.CCH340  |
| H  | -H.CC7HSi | H.2C5933  | 2.4353C0  |
| C  | -5.H58348 | -0.C2900H | 3.0C5598  |
| H  | -5.5384H9 | -H.CC028C | 3.Si2C44  |
| H  | -5.823424 | -0.077784 | 2.3859C4  |
| H  | -5.250C54 | -0.HC984C | 4.0C55C2  |
| C  | -5.7C9434 | 2.5C4734  | 0.7C79C3  |
| H  | -5.329227 | 2.HC54C2  | H.C92820  |
| H  | -C.849752 | 2.7030C5  | 0.948H5C  |
| H  | -5.334590 | 3.5C203H  | 0.593979  |
| C  | -C.2947H0 | -0.2498C8 | -0.377973 |
| H  | -C.3C24CH | -0.830353 | -H.3H2089 |
| H  | -7.3H9050 | -0.SiH049 | 0.0H7C03  |
| H  | -5.720H22 | -0.843532 | 0.340009  |
| C  | -C.5H7303 | 2.H2H958  | -2.H7H970 |



|   |           |          |           |
|---|-----------|----------|-----------|
| H | -7.590398 | H.922799 | -2.002892 |
| H | -C.239579 | H.C23828 | -3.HH7259 |
| H | -C.40HSi2 | 3.205279 | -2.3H7987 |
| C | -3.8H7070 | 4.H938CH | -2.2Si777 |
| H | -4.C52843 | 4.5H2059 | -H.573H73 |
| H | -4.235447 | 3.8C2C5H | -3.H78C94 |
| H | -3.H94278 | 5.084H39 | -2.4H050H |
| C | -H.282898 | 2.CCC7H5 | -2.CH9438 |
| H | -0.5HH0H9 | H.94H357 | -2.3Si393 |
| H | -0.772047 | 3.C394C4 | -2.7HC482 |
| H | -H.C2C8H3 | 2.3C80C2 | -3.C22749 |
| C | -2.05HC49 | 3.C2285C | 0.HC4259  |
| H | -H.3H5755 | 2.999547 | 0.C94888  |
| H | -2.842778 | 3.8833CC | 0.883759  |
| H | -H.529955 | 4.55550H | -0.HHH74H |

-----  
--

-----  
--

[SiPrDis<sub>2</sub>]-Al=N

-----  
--

| Atomic<br>Number | Coordinates (Angstroms) |           |           |
|------------------|-------------------------|-----------|-----------|
|                  | X                       | Y         | Z         |
| Al               | 0.H9C329                | -0.079858 | -0.374447 |
| N                | -0.582350               | 0.409090  | -H.849939 |
| Si               | -2.3408C3               | 0.H0C7C0  | 0.3582H8  |
| C                | -3.370704               | H.340977  | -0.CSi475 |
| H                | -3.24HH2C               | 0.943234  | -H.C35C97 |
| C                | -2.750458               | -H.7CC575 | 0.2Si924  |
| H                | -H.7300CH               | -2.H943C2 | 0.305H7C  |
| C                | -H.9H25C7               | 0.885HH8  | 2.09H808  |
| H                | -H.044979               | H.5H547H  | H.83435C  |

|    |           |           |           |
|----|-----------|-----------|-----------|
| C  | -H.45H2C2 | -0.055285 | 3.2H3082  |
| H  | -2.30HH8C | -0.5849H0 | 3.CC5H2C  |
| H  | -0.9C3453 | 0.523C07  | 4.0HC907  |
| H  | -0.7355HH | -0.804544 | 2.8CHH9C  |
| C  | -2.985093 | H.85HSi4  | 2.C35503  |
| H  | -2.5C7387 | 2.4HCC7C  | 3.4879HH  |
| H  | -3.8704C5 | H.3Si980  | 3.007093  |
| H  | -3.32C3C4 | 2.577H2H  | H.8900HC  |
| Si | -3.H5C09C | -2.43H343 | -H.575H9C |
| Si | -3.544979 | -2.705H99 | H.70399C  |
| Si | -5.2C9540 | H.3CC7C9  | -0.49975C |
| Si | -2.C08353 | 3.093703  | -0.858237 |
| C  | -H.793775 | -3.C82200 | -H.95HC39 |
| H  | -H.C72205 | -4.42HH83 | -H.SiHC42 |
| H  | -0.82C099 | -3.H8275H | -2.H08533 |
| H  | -2.038C94 | -4.235395 | -2.87495H |
| C  | -3.H30234 | -H.HC3392 | -2.9C0243 |
| H  | -4.027508 | -0.52C095 | -2.9849H7 |
| H  | -3.HH3528 | -H.734389 | -3.90C8HC |
| H  | -2.225500 | -0.532374 | -2.92HH82 |
| C  | -4.7859C9 | -3.38H2CC | -H.782825 |
| H  | -4.CC3757 | -4.453H77 | -H.5CCH98 |
| H  | -5.07483H | -3.290H37 | -2.844705 |
| H  | -5.C25H90 | -3.007580 | -H.H84HH7 |
| C  | -4.497793 | -4.270448 | H.240707  |
| H  | -3.90477H | -4.953373 | 0.CH2087  |
| H  | -5.45H75C | -4.077752 | 0.732388  |
| H  | -4.722549 | -4.803C03 | 2.H8H92H  |
| C  | -4.7438H2 | -H.C549C2 | 2.7223HH  |
| H  | -5.753370 | -H.CC5734 | 2.28H2C0  |
| H  | -4.43CSi4 | -0.C048C5 | 2.8H5300  |
| H  | -4.829044 | -2.0C7589 | 3.742538  |
| C  | -2.H5445H | -3.39H852 | 2.798929  |
| H  | -H.723858 | -2.C7033H | 3.5050H3  |
| H  | -H.3292HC | -3.789583 | 2.H83H3C  |

|    |           |           |           |
|----|-----------|-----------|-----------|
| H  | -2.5503H2 | -4.235543 | 3.39HH33  |
| C  | -H.00075C | 3.4C0332  | 0.0C2858  |
| H  | -0.CH093H | 4.4SiCH2  | -0.330275 |
| H  | -0.222999 | 2.702998  | -0.H0399C |
| H  | -H.Si7224 | 3.597007  | H.Si4CH5  |
| C  | -2.29H097 | 3.2CHHH9  | -2.70Si47 |
| H  | -H.838H94 | 4.238300  | -2.94H933 |
| H  | -3.222H3C | 3.HC2770  | -3.2835H9 |
| H  | -H.598572 | 2.4CH925  | -3.0H2923 |
| C  | -3.7H744H | 4.5H792H  | -0.27C23C |
| H  | -4.7379C7 | 4.5H0990  | -0.C83HCC |
| H  | -3.239C34 | 5.458885  | -0.C02387 |
| H  | -3.793750 | 4.5C5803  | 0.822C49  |
| C  | -5.9H858H | 2.227490  | -2.053793 |
| H  | -5.CHCC54 | 3.28020H  | -2.H52033 |
| H  | -7.02H9CC | 2.H92849  | -2.0C5000 |
| H  | -5.5C3H87 | H.C97C52  | -2.95408H |
| C  | -C.0H9380 | -0.3C0HC9 | -0.57C778 |
| H  | -5.884582 | -0.8H0088 | -H.570H89 |
| H  | -7.H05325 | -0.293225 | -0.3898HC |
| H  | -5.597342 | -H.0482H8 | 0.HCC787  |
| C  | -C.0HSi59 | 2.HC928C  | H.038405  |
| H  | -5.594933 | 3.H5CSi3  | H.28H87H  |
| H  | -5.895839 | H.5222C3  | H.92250H  |
| H  | -7.0954CC | 2.29C52C  | 0.8C98H3  |
| Si | 2.448499  | -0.Si4725 | 0.59C5C0  |
| C  | 3.H9C774  | H.5C9539  | 0.H77C94  |
| H  | 4.2CC457  | H.344C28  | 0.33C898  |
| C  | 3.529399  | -H.C4HH89 | 0.03C240  |
| H  | 3.5H8202  | -2.H97449 | 0.997570  |
| C  | 2.20C97H  | -0.43204H | 2.484747  |
| H  | H.4C7385  | 0.3H7437  | 2.805005  |
| C  | 3.488H02  | -0.22C774 | 3.3H094C  |
| H  | 3.27C537  | -0.3277C4 | 4.390C09  |
| H  | 3.934497  | 0.7C2C57  | 3.Si848H  |

|    |          |           |           |
|----|----------|-----------|-----------|
| H  | 4.2475C4 | -0.984H5C | 3.055392  |
| C  | H.CH57C5 | -H.8H7778 | 2.8028CH  |
| H  | H.3H9H99 | -H.877983 | 3.8C432H  |
| H  | 2.349SiC | -2.C207CH | 2.C2C494  |
| H  | 0.73074C | -2.054748 | 2.H94909  |
| Si | 5.427C80 | -H.47322C | -0.H5HC40 |
| Si | 2.724893 | -3.00CH2H | -H.045883 |
| Si | 3.255200 | 2.0855CC  | -H.C74803 |
| Si | 3.007335 | 3.0C0843  | H.3C9402  |
| C  | C.H8C42C | -2.985844 | 0.705388  |
| H  | 5.CC2295 | -3.22H744 | H.C47908  |
| H  | 7.24HHH2 | -2.78HC29 | 0.958378  |
| H  | C.HC4CC4 | -3.888858 | 0.0787H7  |
| C  | C.228854 | -0.00H849 | 0.734373  |
| H  | 5.8350H8 | 0.HCCC35  | H.747270  |
| H  | C.H5CH03 | 0.944594  | 0.H78937  |
| H  | 7.305H5H | -0.227HC7 | 0.837357  |
| C  | C.052334 | -H.403742 | -H.932893 |
| H  | 5.957385 | -0.394009 | -2.3C0592 |
| H  | 5.53235H | -2.H02507 | -2.C0C095 |
| H  | 7.H2482C | -H.CC595H | -H.944HC7 |
| C  | 3.89C095 | -4.4CC579 | -H.3H9C32 |
| H  | 4.2048H7 | -4.9353H3 | -0.37H9CH |
| H  | 4.805H95 | -4.203HC4 | -H.88HC5H |
| H  | 3.357229 | -5.23H292 | -H.90C323 |
| C  | 2.093785 | -2.530H29 | -2.7543C5 |
| H  | 2.899345 | -2.H920HC | -3.423CCH |
| H  | H.3H08CH | -H.75C272 | -2.74H99C |
| H  | H.C5H974 | -3.43824H | -3.202CC2 |
| C  | H.2795C4 | -3.75H9C0 | -0.08Si82 |
| H  | 0.4C2283 | -3.0383H9 | 0.H0593C  |
| H  | H.CH00CC | -4.Si4450 | 0.893205  |
| H  | 0.848394 | -4.589397 | -0.C53544 |
| C  | H.704H08 | 2.89335H  | 2.730522  |
| H  | H.5H7524 | 3.8953HH  | 3.H53958  |

|   |          |           |           |
|---|----------|-----------|-----------|
| H | 2.02H980 | 2.239H77  | 3.554C47  |
| H | 0.742832 | 2.52H9C2  | 2.34CH24  |
| C | 4.C94995 | 3.339774  | 2.H7943H  |
| H | 4.C53C57 | 4.203C05  | 2.8C53C2  |
| H | 5.45C704 | 3.5CH959  | H.4H2850  |
| H | 5.05523H | 2.473545  | 2.75555C  |
| C | 2.C0H5C5 | 4.705498  | 0.534437  |
| H | 3.328329 | 4.9903H9  | -0.240C55 |
| H | 2.C28220 | 5.487024  | H.3Si472  |
| H | H.599H03 | 4.7H8C45  | 0.08CC94  |
| C | 4.9H9H27 | 2.95C7H0  | -H.9H9297 |
| H | 5.042700 | 3.834424  | -H.2C4C08 |
| H | 5.0H8744 | 3.304730  | -2.9C2Si0 |
| H | 5.7C3H93 | 2.274573  | -H.7H9277 |
| C | 3.207324 | 0.C0H7H7  | -2.8244H8 |
| H | 2.HC4333 | 0.308297  | -3.0H2397 |
| H | 3.C54943 | 0.875353  | -3.795953 |
| H | 3.7420C3 | -0.273354 | -2.443CC9 |
| C | H.875777 | 3.H9745H  | -2.3H8HC9 |
| H | H.999852 | 4.2C0H32  | -2.0CC579 |
| H | 0.883C93 | 2.858783  | -H.98C955 |
| H | H.882HC4 | 3.HHH309  | -3.4H957H |

-----  
--

-----  
--

Al=N-[SiPrDis<sub>2</sub>]<sub>2</sub>

-----  
--

| Atomic<br>Number | Coordinates (Angstroms) |          |          |
|------------------|-------------------------|----------|----------|
|                  | X                       | Y        | Z        |
| Al               | 0.249405                | 0.907H03 | H.80HC84 |
| N                | -0.0205HH               | 0.0C8CC2 | 0.HSi988 |

-----  
--

|    |           |           |           |
|----|-----------|-----------|-----------|
| Si | -H.CC79C5 | 0.3C2HH0  | -0.4920H5 |
| Si | H.C2303H  | -0.29733H | -0.509004 |
| C  | -2.CH7822 | H.343705  | 0.904925  |
| H  | -3.585228 | H.454378  | 0.3C9833  |
| C  | -2.80C749 | -H.084497 | -H.H54798 |
| H  | -2.442894 | -H.0C8H0H | -2.20H094 |
| C  | -H.393389 | H.47H053  | -2.0807CH |
| H  | -0.3390C2 | H.7409HH  | -H.909774 |
| C  | -2.H5985H | 2.8020C5  | -2.284287 |
| H  | -2.955420 | 2.C90477  | -3.032327 |
| H  | -H.480305 | 3.587275  | -2.C5CH7H |
| H  | -2.C35829 | 3.H8598C  | -H.3779H2 |
| C  | -H.442C02 | 0.7Si448  | -3.428CH7 |
| H  | -H.0H9484 | H.343505  | -4.23HSi7 |
| H  | -2.48H907 | 0.488H07  | -3.7Si825 |
| H  | -0.88C530 | -0.23H2HC | -3.4305C9 |
| C  | H.49C772  | -0.89C747 | -2.3Si3HC |
| H  | 0.9C7032  | -0.055739 | -2.7840H5 |
| C  | 0.C200H3  | -2.H39943 | -2.48989C |
| H  | 0.454499  | -2.354228 | -3.5C0393 |
| H  | -0.35794C | -2.009C77 | -2.0H9932 |
| H  | H.080C42  | -3.0375C4 | -2.0489H7 |
| C  | 2.80C050  | -H.089453 | -3.094H50 |
| H  | 2.597757  | -H.H57302 | -4.H7700H |
| H  | 3.309009  | -2.02H909 | -2.80C484 |
| H  | 3.5H9835  | -0.274323 | -2.943575 |
| C  | 2.548359  | H.440CC2  | -0.5HH857 |
| H  | H.CCC577  | 2.0793CC  | -0.2954C8 |
| C  | 2.3C050C  | -H.784727 | 0.5073H5  |
| H  | H.792835  | -2.5C0H29 | -0.0520H8 |
| Si | -2.C3H928 | -2.988C34 | -0.9H0H50 |
| Si | -4.C4HHSi | -0.C59CH0 | -H.549748 |
| Si | -2.247C25 | 3.208787  | H.27C5H5  |
| Si | -3.29303H | 0.4C4082  | 2.484450  |
| C  | -4.097H20 | -3.925285 | -0.HC2223 |

|   |           |           |           |
|---|-----------|-----------|-----------|
| H | -3.839980 | -4.999358 | -0.207CH3 |
| H | -5.032870 | -3.79445C | -0.725370 |
| H | -4.288584 | -3.C80H8C | 0.89H8H3  |
| C | -2.4480C3 | -3.7CH84C | -2.C374C7 |
| H | -H.988949 | -4.7CHC02 | -2.54CHC8 |
| H | -H.8H80HC | -3.H7H83C | -3.3H8908 |
| H | -3.424443 | -3.895954 | -3.H27229 |
| C | -H.H38443 | -3.523C52 | 0.HH240C  |
| H | -0.702343 | -4.4335H2 | -0.3323C3 |
| H | -H.423534 | -3.7C8279 | H.Si5CCH  |
| H | -0.35C483 | -2.75895C | 0.H52208  |
| C | -5.20077C | -H.702395 | -3.030589 |
| H | -5.352CH3 | -2.7C4887 | -2.787843 |
| H | -4.48C4C3 | -H.C48884 | -3.8C8C09 |
| H | -C.HC7Si8 | -H.309277 | -3.39239C |
| C | -4.97702C | H.HH235C  | -2.HH2938 |
| H | -C.0CC0C3 | H.H9HC52  | -2.279830 |
| H | -4.485994 | H.3504CH  | -3.0CCH7H |
| H | -4.70H087 | H.887CC0  | -H.384482 |
| C | -5.93C448 | -0.930545 | -0.20HH75 |
| H | -5.978827 | -H.954H94 | 0.H9470H  |
| H | -C.9H8H88 | -0.7HCH74 | -0.CC0549 |
| H | -5.822850 | -0.240384 | 0.C4588H  |
| C | -H.955483 | 3.C3937C  | 3.09C957  |
| H | -H.7C2548 | 4.72CC3H  | 3.H344H2  |
| H | -H.0798H2 | 3.H354HH  | 3.53H5H3  |
| H | -2.82C489 | 3.439282  | 3.738840  |
| C | -3.795572 | 4.204742  | 0.82CH39  |
| H | -4.H27275 | 4.07H85H  | -0.2H53C7 |
| H | -3.C05587 | 5.28HH94  | 0.98H0H9  |
| H | -4.C37H74 | 3.92HH98  | H.479C9H  |
| C | -0.740942 | 3.9430H2  | 0.370833  |
| H | -H.054C97 | 4.C3492H  | -0.42CCC7 |
| H | -0.090078 | 3.H90C7C  | -0.098220 |
| H | -0.H23Si2 | 4.5H3235  | H.084345  |

|    |           |           |           |
|----|-----------|-----------|-----------|
| C  | -2.297HC4 | 0.58487H  | 4.0995C0  |
| H  | -H.2Si274 | 0.740CC5  | 3.97C922  |
| H  | -2.425884 | -0.3CH743 | 4.C50C39  |
| H  | -2.CC8723 | H.40008H  | 4.738298  |
| C  | -4.9C933C | H.24C049  | 2.89H548  |
| H  | -4.84922C | 2.2C4208  | 3.29C257  |
| H  | -5.4834CC | 0.C4CC4H  | 3.CC3052  |
| H  | -5.C394C3 | H.3H5223  | 2.020SiC  |
| C  | -3.533387 | -H.380C38 | 2.2297H2  |
| H  | -2.5883CH | -H.883333 | H.98C090  |
| H  | -4.250077 | -H.C08937 | H.438HC4  |
| H  | -3.9HH84C | -H.823C8C | 3.HC7840  |
| Si | 3.07HHH2  | 2.37H5CH  | -2.H2H7H5 |
| Si | 3.724435  | 2.020H33  | 0.9074CH  |
| Si | H.8C2958  | -2.44H7CH | 2.255527  |
| Si | 4.Si8432  | -2.375H07 | 0.088CHC  |
| C  | H.8C3H82  | 2.29H0C3  | -3.574873 |
| H  | 2.220293  | 3.020C9H  | -4.32403H |
| H  | 0.84329C  | 2.59H077  | -3.29489H |
| H  | H.8H2832  | H.3H3535  | -4.072305 |
| C  | 3.078337  | 4.223733  | -H.7HH895 |
| H  | 3.205577  | 4.785388  | -2.C53979 |
| H  | 3.890004  | 4.53H842  | -H.03CCC2 |
| H  | 2.H24752  | 4.545703  | -H.2CH985 |
| C  | 4.7740CC  | H.9CCC87  | -2.85C985 |
| H  | 5.2H0307  | 2.905H37  | -3.2422C3 |
| H  | 4.C983C2  | H.273750  | -3.709HC7 |
| H  | 5.49H927  | H.5420HC  | -2.Si5CCH |
| C  | 2.995H05  | 3.5C3809  | H.722303  |
| H  | 2.94CCSi  | 4.430252  | H.04C582  |
| H  | 3.CH7097  | 3.84C5CC  | 2.59020H  |
| H  | H.97C78C  | 3.3C973C  | 2.09972H  |
| C  | 3.920383  | 0.7CHHC5  | 2.28240C  |
| H  | 4.582728  | H.H74C9H  | 3.0C2733  |
| H  | 4.357408  | -0.H83452 | H.93859H  |



|   |           |           |           |
|---|-----------|-----------|-----------|
| H | 2.95CHH2  | 0.534377  | 2.75853C  |
| C | 5.499425  | 2.447305  | 0.40C735  |
| H | 5.585CH5  | 3.22730H  | -0.3C2948 |
| H | C.0C447H  | H.5CC79H  | 0.0CC347  |
| H | C.002848  | 2.824023  | H.3H5H99  |
| C | 5.258474  | -2.85CSi7 | H.549033  |
| H | 5.577238  | -H.992HC4 | 2.H52027  |
| H | C.H7272H  | -3.290C97 | H.H05H50  |
| H | 4.833854  | -3.C098C5 | 2.22C495  |
| C | 5.H95CC9  | -H.H0H5H8 | -0.842C72 |
| H | 5.388HH5  | -H.4059HH | -H.88H830 |
| H | C.H72809  | -0.98CC20 | -0.344020 |
| H | 4.723459  | -0.HH3C59 | -0.875404 |
| C | 4.0H5C54  | -3.9CC47C | -0.9299H0 |
| H | 5.0HH843  | -4.2C85H8 | -H.29759H |
| H | 3.352738  | -3.87Si32 | -H.8035C3 |
| H | 3.C2CH0H  | -4.79H70H | -0.3HH770 |
| C | H.92859H  | -4.33Si7C | 2.H00593  |
| H | 2.949H77  | -4.72387C | H.97288C  |
| H | H.32400H  | -4.C8C052 | H.250349  |
| H | H.5H3HC8  | -4.78728H | 3.0HC38C  |
| C | 0.09CC5H  | -2.0C025H | 2.84HHCC  |
| H | -0.5740C4 | -H.727484 | 2.043CC2  |
| H | 0.09740C  | -H.298852 | 3.C3C323  |
| H | -0.340455 | -2.97545H | 3.27CC2H  |
| C | 2.885304  | -H.98H3C3 | 3.780473  |
| H | 2.5C7923  | -H.0H3340 | 4.H97022  |
| H | 3.972285  | -H.95024H | 3.C479C0  |
| H | 2.CC4479  | -2.748508 | 4.545249  |

-----  
--  
-----  
--  
Tbt<sub>2</sub>-Al≡N-Tbt<sub>2</sub>  
-----

--

| Atomic<br>Number | Coordinates (Angstroms) |   |   |
|------------------|-------------------------|---|---|
|                  | X                       | Y | Z |

--

|    |          |           |           |
|----|----------|-----------|-----------|
| C  | 2.8H2CCH | H.293224  | 0.2H720H  |
| C  | 3.548847 | -H.4587HH | 0.2280H5  |
| C  | 3.9780C3 | 0.845708  | -0.428C37 |
| C  | 2.009573 | 0.307H30  | 0.8C8928  |
| C  | 2.374Si2 | -H.07H5H9 | 0.907993  |
| C  | 4.352853 | -0.5H5305 | -0.450382 |
| H  | 4.C23384 | H.5C72C4  | -0.932408 |
| H  | 3.84C48H | -2.507453 | 0.2342H0  |
| C  | 2.44H508 | 2.77CC32  | 0.2C9779  |
| H  | H.333843 | 2.8C344C  | 0.340750  |
| C  | 5.CH8852 | -0.90940C | -H.H7C533 |
| H  | C.03C74H | 0.02Si83  | -H.CH0299 |
| C  | H.5380H8 | -2.08832H | H.C85989  |
| H  | 0.585C95 | -H.587903 | H.985507  |
| Si | 0.908Si9 | -3.C45838 | 0.750492  |
| Si | 2.342289 | -2.477H98 | 3.377CCC  |
| Si | C.9945C0 | -H.475227 | 0.0H359C  |
| Si | 5.287923 | -H.9C793H | -2.725C54 |
| Si | 3.H2234C | 3.552C38  | H.8878H0  |
| Si | 2.8H8972 | 3.8C927H  | -H.2CH747 |
| C  | 4.054049 | -3.23H3C7 | 3.H857H5  |
| H  | 4.042394 | -4.H745C4 | 2.C20733  |
| H  | 4.47H859 | -3.44C055 | 4.H843C4  |
| H  | 4.74H707 | -2.5392H7 | 2.C78852  |
| C  | 2.5HC8HC | -0.8C43HC | 4.328553  |
| H  | 3.22H85C | -0.H8C7H0 | 3.822804  |
| H  | 2.89C9HC | -H.05H249 | 5.347H23  |
| H  | H.55HC85 | -0.34Si05 | 4.4255HC  |
| C  | H.270C43 | -3.C504C5 | 4.395893  |
| H  | 0.22C980 | -3.30CCC2 | 4.470295  |

|   |           |           |           |
|---|-----------|-----------|-----------|
| H | H.C7540C  | -3.70C447 | 5.42HC02  |
| H | H.2597Si  | -4.C75H55 | 3.99H777  |
| C | -0.C97453 | -4.274C37 | H.5H75C7  |
| H | -0.59C784 | -4.5975C7 | 2.5C34H5  |
| H | -H.047555 | -5.Si3802 | 0.9337H9  |
| H | -H.49C2H7 | -3.5H9093 | H.47340C  |
| C | 2.H52H8H  | -5.0C5292 | 0.74739C  |
| H | H.7797C9  | -5.8C3584 | 0.08HC0H  |
| H | 2.288H59  | -5.509747 | H.74C200  |
| H | 3.SiH78C  | -4.7C3777 | 0.37H237  |
| C | 0.5H8228  | -3.HC575C | -H.0H0895 |
| H | H.4Si7C5  | -2.845428 | -H.5CHHH9 |
| H | -0.203447 | -2.335358 | -H.032552 |
| H | 0.0C53C2  | -4.0H00H0 | -H.55C925 |
| C | C.878C80  | -0.448043 | H.589873  |
| H | 5.909832  | -0.57C3HH | 2.09C587  |
| H | C.997544  | 0.C25C03  | H.3C9243  |
| H | 7.C75398  | -0.73C3C7 | 2.29720C  |
| C | C.884977  | -3.30CHC2 | 0.448277  |
| H | 7.544783  | -3.533048 | H.303H2H  |
| H | 7.203979  | -3.9397HH | -0.395380 |
| H | 5.8C553C  | -3.C08292 | 0.730887  |
| C | 8.CC9H90  | -H.H25075 | -0.780820 |
| H | 9.472480  | -H.2H29C5 | -0.029348 |
| H | 8.708948  | -0.H00C55 | -H.H88973 |
| H | 8.90H857  | -H.820500 | -H.C0H834 |
| C | C.88842H  | -2.H30C8H | -3.7HH88C |
| H | 7.397794  | -H.H59H92 | -3.82C575 |
| H | C.C704H0  | -2.5H33Si | -4.723743 |
| H | 7.599954  | -2.828H05 | -3.24H305 |
| C | 4.C25924  | -3.C90034 | -2.344557 |
| H | 4.45C5C7  | -4.23257H | -3.290955 |
| H | 3.CCH757  | -3.C474C8 | -H.8HCCHC |
| H | 5.32H923  | -4.28835C | -H.737787 |
| C | 4.0HH909  | -H.0C879H | -3.779CH2 |

|   |           |           |           |
|---|-----------|-----------|-----------|
| H | 3.84442C  | -H.C0H793 | -4.73H339 |
| H | 4.337H0C  | -0.0437H2 | -4.023829 |
| H | 3.043C22  | -0.995954 | -3.259933 |
| C | 2.882947  | 5.422352  | H.95CC0C  |
| H | 3.H744C4  | 5.77C394  | 2.9CH055  |
| H | H.829820  | 5.705754  | H.800582  |
| H | 3.492809  | 5.9700HC  | H.222354  |
| C | 2.H9HCC9  | 2.85335H  | 3.3C8324  |
| H | H.H32C49  | 3.HC029H  | 3.3572HH  |
| H | 2.C2585H  | 3.2302C9  | 4.3H047H  |
| H | 2.2440HH  | H.755797  | 3.404030  |
| C | 4.94H9H8  | 3.HH7C25  | 2.0C4889  |
| H | 5.072375  | 2.028C35  | 2.H57959  |
| H | 5.3C2042  | 3.59075H  | 2.9C8588  |
| H | 5.53C8C8  | 3.45Si55  | H.20H54C  |
| C | H.75772C  | 5.43930C  | -H.20HHC0 |
| H | H.35982H  | 5.C59938  | -2.205800 |
| H | 2.347037  | C.3H2C34  | -0.880HH2 |
| H | 0.89440C  | 5.35CH98  | -0.525384 |
| C | 2.4079CH  | 2.934CC2  | -2.83C775 |
| H | 3.083C87  | 2.0835H9  | -3.00C9H7 |
| H | 2.48494C  | 3.C08252  | -3.707C32 |
| H | H.38H0H2  | 2.5448C9  | -2.80720C |
| C | 4.C23825  | 4.425H59  | -H.358920 |
| H | 5.335CC0  | 3.58508H  | -H.37C399 |
| H | 4.9027H5  | 5.08509H  | -0.52205H |
| H | 4.7C9H8H  | 4.99988C  | -2.290C38 |
| C | -3.249H50 | 0.574875  | 0.907539  |
| C | -3.380008 | -0.3580C4 | -H.749H2C |
| C | -2.H955H8 | 0.88C955  | -0.0Si525 |
| C | -4.2437H5 | -0.333580 | 0.5005C2  |
| C | -4.3H8C77 | -0.83783C | -0.8H3493 |
| C | -2.32072C | 0.498755  | -H.403904 |
| H | -4.997754 | -0.C32354 | H.233HSi  |
| H | -3.483054 | -0.C77C24 | -2.788222 |

|    |           |           |           |
|----|-----------|-----------|-----------|
| C  | -3.374H27 | H.20C48H  | 2.30322H  |
| H  | -4.44793C | H.05H704  | 2.543529  |
| C  | -H.378H39 | H.0C9902  | -2.47HH39 |
| H  | -0.39H374 | H.237474  | -H.997H52 |
| C  | -5.420042 | -H.78CCH2 | -H.248405 |
| H  | -5.340C73 | -H.892C83 | -2.34933H |
| Si | -7.H5045C | -H.03C547 | -H.00242H |
| Si | -5.H3325C | -3.559H7C | -0.C25C34 |
| Si | -H.03C575 | 0.0C0570  | -4.0C522C |
| Si | -2.0H59H2 | 2.8329H8  | -2.9Si054 |
| Si | -3.358C35 | 3.H2022H  | 2.3C4HC2  |
| Si | -2.C409C2 | 0.350787  | 3.84C7HH  |
| C  | -3.50259C | -4.H8Si30 | -H.343077 |
| H  | -3.5HC8H2 | -4.H54C49 | -2.44587C |
| H  | -3.30C04H | -5.222952 | -H.0342H9 |
| H  | -2.C57873 | -3.5CH735 | -H.005774 |
| C  | -C.5HCCC7 | -4.C95C58 | -H.228590 |
| H  | -C.C75H90 | -4.5959C9 | -2.3H5537 |
| H  | -7.47C748 | -4.484C29 | -0.730274 |
| H  | -C.2CH852 | -5.750H78 | -H.024C40 |
| C  | -5.02C058 | -3.C73H78 | H.25338H  |
| H  | -4.92Si2H | -4.728533 | H.5C0998  |
| H  | -5.9H8942 | -3.2C5H8C | H.75H2C8  |
| H  | -4.Si7775 | -3.H270H0 | H.C29802  |
| C  | -7.8C959H | -H.3C7CC7 | 0.7H3703  |
| H  | -8.050377 | -2.44H347 | 0.88C258  |
| H  | -8.835747 | -0.845338 | 0.82432H  |
| H  | -7.205CC5 | -H.005HCC | H.5H5207  |
| C  | -8.3Si7Si | -H.7573C2 | -2.302CH7 |
| H  | -8.54C532 | -2.8H8347 | -2.H22007 |
| H  | -7.8C7844 | -H.C80H27 | -3.308884 |
| H  | -9.2C802C | -H.20H894 | -2.3H9592 |
| C  | -7.057483 | 0.82C537  | -H.2C5507 |
| H  | -C.CH8250 | H.0C4C7H  | -2.248292 |
| H  | -C.433075 | H.3H3837  | -0.500C4C |

|   |           |           |           |
|---|-----------|-----------|-----------|
| H | -8.0C58CC | H.274H0C  | -H.225745 |
| C | 0.547882  | 0.C5793C  | -4.9HHH58 |
| H | H.4SiC00  | 0.5899C3  | -4.23C804 |
| H | 0.4993H0  | H.C87H92  | -5.29H580 |
| H | 0.75C705  | -0.003500 | -5.77HHH3 |
| C | -0.732942 | -H.77H270 | -3.7C0099 |
| H | -0.7H3850 | -2.302444 | -4.727907 |
| H | -H.492508 | -2.24CSiH | -3.H23589 |
| H | 0.248H32  | -H.9H8852 | -3.288Si8 |
| C | -2.435H20 | 0.H72587  | -5.335582 |
| H | -2.58H282 | H.H908HC  | -5.72C8C3 |
| H | -3.399840 | -0.HC9447 | -4.929HC7 |
| H | -2.H8949H | -0.478C59 | -C.H93320 |
| C | -H.C49C77 | 4.025455  | -H.50C7H2 |
| H | -2.34H739 | 3.88CCHH  | -0.CC8407 |
| H | -H.7242C0 | 5.07SiH9  | -H.850259 |
| H | -0.C3CC5H | 3.85742C  | -H.HH84H5 |
| C | -H.2003H3 | 3.C05C50  | -4.44HC97 |
| H | -H.39C82H | 3.0C55C7  | -5.3800C5 |
| H | -0.H09390 | 3.703542  | -4.3288C0 |
| H | -H.C0C728 | 4.C2C403  | -4.559738 |
| C | -3.874828 | 2.77483H  | -3.2HH272 |
| H | -4.4058H0 | 2.43C775  | -2.309H32 |
| H | -4.Si4CH2 | 2.09H5H3  | -4.03H030 |
| H | -4.2502C2 | 3.779287  | -3.473384 |
| C | -4.524983 | 3.C9C983  | H.00H357  |
| H | -4.30425C | 3.207CC3  | 0.042H20  |
| H | -4.474073 | 4.789000  | 0.8553C4  |
| H | -5.5C44H9 | 3.440822  | H.270094  |
| C | -4.H3HH78 | 3.C75075  | 4.004855  |
| H | -3.480742 | 3.4875CC  | 4.874880  |
| H | -5.H02C70 | 3.H90424  | 4.H9C972  |
| H | -4.308208 | 4.7C4CSi  | 3.9C39Si  |
| C | -H.C99520 | 4.0Si550  | 2.274974  |
| H | -H.Si7338 | 3.75H70H  | H.3C5HC0  |

|    |           |           |          |
|----|-----------|-----------|----------|
| H  | -H.074399 | 3.7C2HCC  | 3.SiC988 |
| H  | -H.8CC80H | 5.H0C2C7  | 2.295722 |
| C  | -3.983Si0 | 0.30H858  | 5.H79093 |
| H  | -4.2H9750 | H.300CC3  | 5.57CCH0 |
| H  | -3.CC4528 | -0.327257 | C.0285Si |
| H  | -4.9H7C9H | -0.H28C2H | 4.779975 |
| C  | -H.Si35C4 | H.H900C7  | 4.C5H054 |
| H  | -H.38048C | 2.205427  | 5.0070H9 |
| H  | -0.2C9450 | H.284848  | 3.9830H0 |
| H  | -0.8H2734 | 0.C00408  | 5.524294 |
| C  | -2.H85H33 | -H.43943C | 3.484H3C |
| H  | -3.090409 | -2.028243 | 3.2C8272 |
| H  | -H.C8C543 | -H.89C329 | 4.3557H7 |
| H  | -H.5H94H3 | -H.544322 | 2.CSi5H9 |
| Al | 0.2H8838  | 0.83495H  | H.350324 |
| N  | -H.048572 | H.5304C9  | 0.4H980C |

--

--

Tbt<sub>2</sub>-Al=N

--

| Atomic<br>Number | Coordinates (Angstroms) |   |   |
|------------------|-------------------------|---|---|
|                  | X                       | Y | Z |

--

|   |          |           |           |
|---|----------|-----------|-----------|
| C | 2.CC0522 | H.320970  | -0.HH3879 |
| C | 3.H750C2 | -H.388054 | 0.482C53  |
| C | 3.872H04 | 0.C90447  | -0.49H897 |
| C | H.C0747H | 0.53CH97  | 0.507H32  |
| C | H.953435 | -0.8Si439 | 0.90873H  |
| C | 4.Si28HH | -0.C7500H | -0.2C3H5C |
| H | 4.C52Si0 | H.2908H7  | -0.975083 |
| H | 3.392738 | -2.4H8355 | 0.77530C  |

|    |           |           |           |
|----|-----------|-----------|-----------|
| C  | 2.592HC7  | 2.83023H  | -0.3H9595 |
| H  | H.537272  | 3.H8H028  | -0.Si5995 |
| C  | 5.4CH899  | -H.255790 | -0.742703 |
| H  | C.0797CH  | -0.387823 | -H.0CH59C |
| C  | H.H33790  | -H.52237C | H.974049  |
| H  | 0.2C4432  | -0.87H247 | 2.H8C283  |
| Si | 0.3CSi28  | -3.222795 | H.5397HC  |
| Si | 2.H59999  | -H.553C59 | 3.C0740H  |
| Si | C.5444HC  | -2.049979 | 0.CHH57C  |
| Si | 5.28H098  | -2.245C97 | -2.370C30 |
| Si | 3.39559H  | 3.7HH7H3  | H.209220  |
| Si | 3.H7229H  | 3.573057  | -H.979470 |
| C  | 3.34740C  | -3.0209HC | 3.C5CC70  |
| H  | 2.82C203  | -3.99H72C | 3.CC0850  |
| H  | 3.9509H7  | -2.9C4858 | 4.580029  |
| H  | 4.050755  | -3.020448 | 2.8HH9C5  |
| C  | 3.H5C347  | 0.034543  | 3.8002H3  |
| H  | 3.5932C0  | 0.39HSi9  | 2.855CH3  |
| H  | 3.978H53  | -0.H2H743 | 4.5H997H  |
| H  | 2.525909  | 0.839257  | 4.200509  |
| C  | H.055899  | -H.C5H29H | 5.H339CC  |
| H  | 0.3C2342  | -0.80Si2H | 5.H78525  |
| H  | H.C95879  | -H.C028C9 | C.03HC05  |
| H  | 0.4C70C0  | -2.57C0HC | 5.H92H7C  |
| C  | -H.2HH7C8 | -2.94255C | 0.5527C4  |
| H  | -2.044H34 | -2.C474HC | H.2H2740  |
| H  | -H.5H2303 | -3.87H9H7 | 0.0402H9  |
| H  | -H.HH5H79 | -2.Si5555 | -0.H985H5 |
| C  | -0.H8309C | -4.H89499 | 3.0737CH  |
| H  | -0.C9H772 | -5.H08829 | 2.728504  |
| H  | -0.90935H | -3.C2C004 | 3.C80H8C  |
| H  | 0.C44305  | -4.50H77H | 3.729775  |
| C  | H.538994  | -4.3408C3 | 0.582025  |
| H  | 2.48H993  | -4.52HH98 | H.H2C225  |
| H  | H.7925C7  | -3.937772 | -0.409795 |



|   |          |           |           |
|---|----------|-----------|-----------|
| H | H.055729 | -5.323350 | 0.428H87  |
| C | C.37SiC4 | -H.048740 | 2.H95339  |
| H | 5.34H834 | -H.0572H0 | 2.578278  |
| H | C.C50C82 | 0.005499  | 2.0H9094  |
| H | 7.035532 | -H.4440C7 | 2.984437  |
| C | C.099H53 | -3.8CHH33 | 0.909542  |
| H | C.C2H5C9 | -4.25H572 | H.80H03C  |
| H | C.394CH5 | -4.487439 | 0.050452  |
| H | 5.0H88Si | -4.0H32Si | H.0C754H  |
| C | 8.35C358 | -H.943544 | 0.079588  |
| H | 9.0HC72H | -2.H2C458 | 0.94C2H3  |
| H | 8.599850 | -0.938084 | -0.3087Si |
| H | 8.C2H998 | -2.C75903 | -0.C98879 |
| C | C.8C7H34 | -3.H70H99 | -2.82C49H |
| H | 7.733C7C | -2.4909C9 | -2.90HC44 |
| H | C.73HH77 | -3.C38049 | -3.8H8909 |
| H | 7.H2C959 | -3.973734 | -2.HH78H8 |
| C | 3.8C8027 | -3.483C40 | -2.27C929 |
| H | 3.8H80H2 | -4.074999 | -3.209338 |
| H | 2.898C27 | -2.973980 | -2.H5HH72 |
| H | 3.990534 | -4.H9Si43 | -H.4399H3 |
| C | 4.959494 | -H.02C5H3 | -3.770H74 |
| H | 4.784C87 | -H.5539HH | -4.725H55 |
| H | 5.8H89C8 | -0.3473H0 | -3.9H5HC2 |
| H | 4.072400 | -0.4083H7 | -3.5C9427 |
| C | 3.405C08 | 5.588320  | 0.9C7H34  |
| H | 3.7HSi85 | C.0C48H8  | H.9SiCC3  |
| H | 2.3908H7 | 5.945537  | 0.732249  |
| H | 4.087770 | 5.945273  | 0.H80CC8  |
| C | 2.373344 | 3.4H8257  | 2.7C4980  |
| H | H.535442 | 4.HH9474  | 2.8035H9  |
| H | 3.005273 | 3.5C989H  | 3.C5C50C  |
| H | H.97H284 | 2.403772  | 2.79C287  |
| C | 5.H5H078 | 3.08H795  | H.509C30  |
| H | 5.Si9700 | 2.004223  | H.745290  |

|    |           |           |           |
|----|-----------|-----------|-----------|
| H  | 5.588575  | 3.CH5775  | 2.372C03  |
| H  | 5.8H7345  | 3.23C805  | 0.C4493C  |
| C  | 2.245588  | 5.H85H95  | -2.325H7C |
| H  | 2.448700  | 5.497874  | -3.3C34C4 |
| H  | 2.573475  | 5.999450  | -H.CC4424 |
| H  | H.HCSi53  | 5.090332  | -2.2H79H7 |
| C  | 2.85H3H8  | 2.375530  | -3.3909H2 |
| H  | 3.C00023  | H.5C885H  | -3.4H0399 |
| H  | 2.897209  | 2.897942  | -4.3CH582 |
| H  | H.8C590H  | H.904897  | -3.30C092 |
| C  | 5.02C580  | 3.97CCHH  | -2.028C74 |
| H  | 5.C5C720  | 3.082955  | -H.8C7795 |
| H  | 5.3234Si  | 4.733525  | -H.283585 |
| H  | 5.28040C  | 4.3805H3  | -3.027HH3 |
| C  | -3.094907 | 0.555C0H  | 0.853398  |
| C  | -3.H20059 | -0.C90587 | -H.C8CC7H |
| C  | -H.9HH77H | 0.C0243C  | 0.04H788  |
| C  | -4.H98445 | -0.2HH582 | 0.408HC8  |
| C  | -4.23495C | -0.8C9C29 | -0.8384H7 |
| C  | -H.9840C7 | 0.044922  | -H.28C040 |
| H  | -5.073459 | -0.282303 | H.0CH58C  |
| H  | -3.HC5H59 | -H.HH38H8 | -2.C94887 |
| C  | -3.340493 | H.324C54  | 2.H55228  |
| H  | -4.299989 | 0.908700  | 2.532CCC  |
| C  | -0.9H9792 | 0.408H92  | -2.3085C7 |
| H  | 0.007307  | 0.CC0903  | -H.750233 |
| C  | -5.43C394 | -H.C92028 | -H.2C2CH3 |
| H  | -5.274050 | -H.9875HC | -2.3228HH |
| Si | -7.0CH375 | -0.C9H252 | -H.32C547 |
| Si | -5.4933H2 | -3.3C5837 | -0.333582 |
| Si | -0.4348H0 | -0.953977 | -3.5C5038 |
| Si | -H.5H794H | 2.057H85  | -3.H27554 |
| Si | -3.935H58 | 3.SiHH7H  | H.9237C0  |
| Si | -2.28HC50 | 0.9Si88C  | 3.CCH548  |
| C  | -4.HC542C | -4.4C23C5 | -H.H04C57 |

|   |           |           |           |
|---|-----------|-----------|-----------|
| H | -4.4755Si | -4.79CH22 | -2.HH2000 |
| H | -3.97305C | -5.3C538C | -0.497028 |
| H | -3.2H5099 | -3.9H3874 | -H.208553 |
| C | -7.Si745H | -4.255H92 | -0.550225 |
| H | -7.4H3838 | -4.387579 | -H.CH2C48 |
| H | -7.98270C | -3.732057 | -0.0550C3 |
| H | -7.07CC54 | -5.2C2080 | -0.099H07 |
| C | -5.H9CC39 | -3.HC8433 | H.5H8C0H  |
| H | -5.28H2H3 | -4.H53HH5 | 2.0Si4H3  |
| H | -5.94059H | -2.49858C | H.984H29  |
| H | -4.H9C70H | -2.7C20H7 | H.7374H9  |
| C | -7.800H29 | -0.3825H2 | 0.38C409  |
| H | -7.9CC459 | -H.320095 | 0.944394  |
| H | -8.779727 | 0.HH9427  | 0.288383  |
| H | -7.H58529 | 0.2C9927  | H.0024H7  |
| C | -8.329708 | -H.CHH342 | -2.385203 |
| H | -8.853384 | -2.4H0827 | -H.838H98 |
| H | -7.85850H | -2.0CC8H8 | -3.274404 |
| H | -9.0933C9 | -0.90009C | -2.747588 |
| C | -C.730705 | 0.958H54  | -2.H70773 |
| H | -C.3CH753 | 0.8093C8  | -3.200374 |
| H | -5.97835H | H.55H90H  | -H.C3H7CH |
| H | -7.C5C87H | H.557352  | -2.228933 |
| C | H.237384  | -0.548H95 | -4.32H2HH |
| H | H.983930  | -0.39H309 | -3.527455 |
| H | H.232482  | 0.345073  | -4.9CH89H |
| H | H.58Si84  | -H.399979 | -4.934237 |
| C | -0.234297 | -2.C3Si5C | -2.73H8C0 |
| H | 0.HC7H04  | -3.3599C9 | -3.4C0548 |
| H | -H.H83333 | -3.03HC2H | -2.34HH78 |
| H | 0.47C9Si  | -2.573HC9 | -H.89H024 |
| C | -H.C73C70 | -H.H7H02H | -4.982789 |
| H | -H.832880 | -0.247043 | -5.5C0273 |
| H | -2.CCH22H | -H.527224 | -4.C45HC5 |
| H | -H.277385 | -H.930593 | -5.C8H539 |

|   |           |           |           |
|---|-----------|-----------|-----------|
| C | -H.283344 | 3.4C0Si5  | -H.90C57C |
| H | -H.5C8834 | 4.408089  | -2.3734H9 |
| H | -0.25H385 | 3.548005  | -H.583258 |
| H | -H.907537 | 3.3H844H  | -H.023C8H |
| C | -0.C20499 | 2.50C235  | -4.723498 |
| H | -0.7500C2 | H.747097  | -5.508998 |
| H | 0.452374  | 2.C80CH2  | -4.5943H9 |
| H | -H.0C3H2C | 3.442307  | -5.099237 |
| C | -3.33454H | H.922988  | -3.587390 |
| H | -3.9793H0 | H.832245  | -2.70422C |
| H | -3.532H58 | H.053853  | -4.2339H5 |
| H | -3.C38HC4 | 2.825930  | -4.Si07H2 |
| C | -4.7C0802 | 3.257SiH  | 0.234843  |
| H | -4.HH3988 | 2.8C88CH  | -0.5CCCC0 |
| H | -5.02204H | 4.3022CH  | -0.00455C |
| H | -5.C92045 | 2.CCC492  | 0.2255H3  |
| C | -5.2C090H | 3.5007C5  | 3.227928  |
| H | -4.82203H | 3.730790  | 4.2H0852  |
| H | -5.978289 | 2.C739C2  | 3.3C2305  |
| H | -5.83254H | 4.39H584  | 2.9HH972  |
| C | -2.C74280 | 4.52447H  | 2.HH8842  |
| H | -3.2H9238 | 5.488748  | 2.H05H0C  |
| H | -H.9SiC8H | 4.532C70  | H.3H999H  |
| H | -2.H3H940 | 4.47003H  | 3.0734H8  |
| C | -3.Si20CC | H.57779H  | 5.20254C  |
| H | -3.0C0372 | 2.CC8702  | 5.29CCC7  |
| H | -2.C934C5 | H.H293C2  | C.H02837  |
| H | -4.2H329C | H.320C92  | 5.20237H  |
| C | -0.5C5879 | H.C799C7  | 3.C4H77H  |
| H | -0.C55C7C | 2.750H03  | 3.50534H  |
| H | 0.HC3H89  | H.3H084C  | 2.9H09CH  |
| H | -0.H00054 | H.50C280  | 4.CH88H2  |
| C | -2.27HH88 | -0.958H84 | 3.803H38  |
| H | -3.3H0403 | -H.3287H7 | 3.784420  |
| H | -H.809C2H | -H.299CHC | 4.74037C  |

|    |           |           |          |
|----|-----------|-----------|----------|
| H  | -H.74H705 | -H.429027 | 2.9C5H75 |
| N  | -0.H23907 | 3.28C7H0  | 0.80C0C4 |
| Al | -0.H8H004 | H.402770  | 0.C00C77 |

--

Al=N-Tbt<sub>2</sub>

--

| Atomic<br>Number | Coordinates (Angstroms) |   |   |
|------------------|-------------------------|---|---|
|                  | X                       | Y | Z |

--

|    |           |           |           |
|----|-----------|-----------|-----------|
| C  | -2.2C5C24 | H.25797H  | 0.33C84C  |
| C  | -2.87C224 | -H.302CH2 | -0.C8C249 |
| C  | -3.53H977 | 0.C55443  | 0.5HCH24  |
| C  | -H.200592 | 0.4C99HH  | -0.2458HC |
| C  | -H.590Si8 | -0.75C45H | -0.924054 |
| C  | -3.8C3333 | -0.C35H97 | 0.0C9H80  |
| H  | -4.3HH8C0 | H.243785  | H.0005H7  |
| H  | -3.H33504 | -2.2400C7 | -H.H77C44 |
| C  | -2.HC90H3 | 2.743743  | 0.C9H542  |
| H  | -H.HHH9Si | 3.055Si7  | 0.C39459  |
| C  | -5.259H02 | -H.H79C9C | 0.340380  |
| H  | -5.824938 | -0.343435 | 0.799990  |
| C  | -0.779909 | -H.3454Si | -2.0808C2 |
| H  | 0.HCH758  | -0.774C50 | -2.HCC8C3 |
| Si | -0.H53740 | -3.Si909C | -H.93C25C |
| Si | -H.7070C9 | -H.082H82 | -3.759775 |
| Si | -C.340240 | -H.C07053 | -H.H745C0 |
| Si | -5.282954 | -2.47937C | H.7395H2  |
| Si | -3.H58083 | 3.90C27C  | -0.5H22CC |
| Si | -2.705497 | 3.2Si07C  | 2.487C53  |
| C  | -2.9H3770 | -2.483279 | -4.H5C359 |

|   |           |           |           |
|---|-----------|-----------|-----------|
| H | -2.40727C | -3.4443H7 | -4.335250 |
| H | -3.4C0508 | -2.2237C3 | -5.080042 |
| H | -3.CC53C2 | -2.C4050C | -3.37007H |
| C | -2.C82285 | 0.53HC42  | -3.793053 |
| H | -3.H93545 | 0.753897  | -2.84C435 |
| H | -3.44H579 | 0.49Si28  | -4.593592 |
| H | -2.00C84H | H.37H527  | -4.02H08C |
| C | -0.502HCC | -0.95330C | -5.208C93 |
| H | 0.H87422  | -0.H05453 | -5.084009 |
| H | -H.084374 | -0.7C9074 | -C.H29328 |
| H | 0.099847  | -H.85C328 | -5.3737CC |
| C | H.273H73  | -3.H93802 | -0.7374C0 |
| H | 2.H29030  | -2.C30927 | -H.H35H08 |
| H | H.59C484  | -4.2332HC | -0.5734H8 |
| H | H.029549  | -2.743052 | 0.228435  |
| C | 0.5CCH53  | -3.78797H | -3.5C5598 |
| H | H.0H8284  | -4.7748C7 | -3.359248 |
| H | H.3C93Si  | -3.H38578 | -3.947C92 |
| H | -0.H7459C | -3.9304HH | -4.3CCC78 |
| C | -H.480922 | -4.3805C9 | -H.4HH005 |
| H | -2.3CC070 | -4.3C5C5H | -2.0C4C70 |
| H | -H.8H5825 | -4.2Si99H | -0.378545 |
| H | -H.055945 | -5.398C99 | -H.4598H2 |
| C | -5.9CC055 | -0.44H949 | -2.C0H075 |
| H | -4.9C284C | -0.C05CC7 | -3.0H2C24 |
| H | -C.032827 | 0.CH255H  | -2.287233 |
| H | -C.C9CH85 | -0.59CC54 | -3.4Si488 |
| C | -C.H24784 | -3.388089 | -H.7C2C85 |
| H | -C.CH333C | -3.5253CC | -2.742823 |
| H | -C.58532C | -4.H03728 | -H.0C2H00 |
| H | -5.0CCCH8 | -3.CC925H | -H.87C770 |
| C | -8.H55732 | -H.3479H3 | -0.7H39CC |
| H | -8.775839 | -H.35435C | -H.C274CH |
| H | -8.3H0C45 | -0.373C4H | -0.2H9Si8 |
| H | -8.545820 | -2.H28289 | -0.044003 |

|   |           |           |           |
|---|-----------|-----------|-----------|
| C | -7.05C094 | -2.935859 | 2.20457C  |
| H | -7.C88472 | -2.045905 | 2.358332  |
| H | -7.04827H | -3.504H38 | 3.H5H320  |
| H | -7.544030 | -3.5C9934 | H.447HC8  |
| C | -4.358473 | -4.05478C | H.29944C  |
| H | -4.322880 | -4.722259 | 2.H782CC  |
| H | -3.322592 | -3.83877H | H.0073C7  |
| H | -4.83C088 | -4.C09474 | 0.478225  |
| C | -4.477Si2 | -H.C8H085 | 3.23C8C4  |
| H | -4.43C7H8 | -2.373724 | 4.094HH2  |
| H | -5.0337C7 | -0.783CC5 | 3.55C589  |
| H | -3.449H7H | -H.3724CH | 3.0033C9  |
| C | -3.048779 | 5.C9397C  | 0.H030H5  |
| H | -3.435305 | C.35H985  | -0.C9479C |
| H | -2.004724 | 5.99H8C7  | 0.293250  |
| H | -3.C29798 | 5.904553  | H.0HH399  |
| C | -2.589775 | 4.054553  | -2.30C330 |
| H | -H.58H3H8 | 4.478959  | -2.4H8848 |
| H | -3.29C993 | 4.75CC2H  | -2.788075 |
| H | -2.C34838 | 3.HH3232  | -2.8C8404 |
| C | -4.9C30C7 | 3.380223  | -0.C85907 |
| H | -5.0302C2 | 2.409059  | -H.200493 |
| H | -5.479CH3 | 4.H250C7  | -H.3HC92H |
| H | -5.5H7527 | 3.300824  | 0.257729  |
| C | -H.74CC80 | 4.752029  | 3.039978  |
| H | -H.53274C | 4.C94328  | 4.H20878  |
| H | -2.3254C9 | 5.C7243H  | 2.870893  |
| H | -0.785H94 | 4.8C2829  | 2.5H7HC5  |
| C | -2.393C9C | H.794H34  | 3.CC948C  |
| H | -3.05288H | 0.945SiH  | 3.439205  |
| H | -2.C048CC | 2.HHC778  | 4.703322  |
| H | -H.3C0C37 | H.4374C3  | 3.C3H995  |
| C | -4.542002 | 3.C0984C  | 2.732950  |
| H | -5.H99H5C | 2.75884H  | 2.493323  |
| H | -4.89CH98 | 4.4832C0  | 2.HCCC43  |

|    |           |           |           |
|----|-----------|-----------|-----------|
| H  | -4.C8C94C | 3.834930  | 3.805025  |
| C  | 2.587392  | 0.78CCHH  | -0.C49355 |
| C  | 2.705C32  | -H.02HH5H | H.47CC78  |
| C  | H.35590C  | 0.4890C4  | 0.0C40CC  |
| C  | 3.75H22C  | 0.038950  | -0.3C0758 |
| C  | 3.847097  | -0.909C34 | 0.CC9538  |
| C  | H.50273H  | -0.304829 | H.270H95  |
| H  | 4.C4284C  | 0.254CC0  | -0.953237 |
| H  | 2.780C59  | -H.C30894 | 2.374807  |
| C  | 2.8C7H25  | H.958747  | -H.C30CC8 |
| H  | 3.978939  | H.977783  | -H.574978 |
| C  | 0.5C2020  | -0.23224C | 2.4828H0  |
| H  | -0.38H943 | 0.252C70  | 2.H8525C  |
| C  | 5.Si0597  | -H.C4932C | H.00H885  |
| H  | 5.05H0H9  | -H.98982C | 2.053498  |
| Si | C.7237C3  | -0.580839 | H.03H722  |
| Si | 5.308874  | -3.285477 | 0.02955H  |
| Si | 0.0HC490  | -H.8C0700 | 3.337533  |
| Si | H.4235HH  | 0.982244  | 3.730H99  |
| Si | 2.8H39CH  | 3.75H594  | -0.93097C |
| Si | 2.927H53  | H.C48H22  | -3.55H029 |
| C  | 4.0940C9  | -4.5H9749 | 0.777Si7  |
| H  | 4.5H00C3  | -4.932008 | H.7H2855  |
| H  | 3.90H283  | -5.3CC9CC | 0.09C928  |
| H  | 3.H30538  | -4.048CSi | H.0H35Si  |
| C  | 7.0HC224  | -4.07987H | 0.20835H  |
| H  | 7.284989  | -4.235H8H | H.2C5940  |
| H  | 7.823554  | -3.499779 | -0.2C53HH |
| H  | C.998C92  | -5.073384 | -0.274242 |
| C  | 5.005238  | -3.005898 | -H.808938 |
| H  | 5.0C5743  | -3.9CH570 | -2.3579C4 |
| H  | 5.7C4973  | -2.32980C | -2.234833 |
| H  | 4.0H8C43  | -2.5C4208 | -2.00C4H7 |
| C  | 7.48C380  | -0.33277H | -0.C8H8C7 |
| H  | 7.78HC23  | -H.287225 | -H.SiC308 |



|   |           |           |           |
|---|-----------|-----------|-----------|
| H | 8.395C55  | 0.288234  | -0.597432 |
| H | C.8039H5  | 0.H79243  | -H.379474 |
| C | 8.0H3307  | -H.403H34 | 2.Si5303  |
| H | 8.542555  | -2.232037 | H.C53579  |
| H | 7.553948  | -H.798009 | 3.0C78H5  |
| H | 8.7C9554  | -0.C58H38 | 2.448357  |
| C | C.375407  | H.HH3200  | H.773527  |
| H | C.H0H935  | H.028HCH  | 2.837444  |
| H | 5.554843  | H.C295H9  | H.2579C0  |
| H | 7.27C3CC  | H.7483H5  | H.709C29  |
| C | -H.2H7C88 | -H.529257 | 4.73C080  |
| H | -H.89C85H | -0.C88440 | 4.549897  |
| H | -0.709589 | -H.340795 | 5.C92579  |
| H | -H.839377 | -2.430745 | 4.8C7308  |
| C | -0.835497 | -3.030293 | 2.H2973C  |
| H | -H.559H93 | -3.C55344 | 2.C77285  |
| H | -0.H24820 | -3.707H9H | H.C3CH58  |
| H | -H.38097C | -2.480834 | H.348C55  |
| C | H.428H3H  | -2.808045 | 4.H73892  |
| H | 2.030HC4  | -2.HC53HC | 4.83C74H  |
| H | 2.H090CH  | -3.2987H7 | 3.4CH39C  |
| H | 0.988937  | -3.C0SiH8 | 4.804729  |
| C | H.22C58H  | 2.74C554  | 3.0897Si  |
| H | 2.HH5087  | 3.35H875  | 3.333322  |
| H | 0.3C2H02  | 3.23HH34  | 3.5C2388  |
| H | H.0840C8  | 2.775H52  | 2.000HC2  |
| C | 0.752CC4  | 0.9589C0  | 5.502775  |
| H | H.03C078  | 0.040CH0  | C.04H248  |
| H | -0.33C448 | H.0750C5  | 5.580400  |
| H | H.2H79C8  | H.804777  | C.0409H3  |
| C | 3.2C7C77  | 0.C48583  | 3.943H05  |
| H | 3.832774  | 0.8447HH  | 3.02340C  |
| H | 3.48C70C  | -0.3833H3 | 4.2579HH  |
| H | 3.C478C7  | H.322C57  | 4.732449  |
| C | 3.77HC73  | 3.73024H  | 0.C8982C  |

|    |           |           |           |
|----|-----------|-----------|-----------|
| H  | 3.442930  | 2.924274  | H.3593C0  |
| H  | 3.C5H880  | 4.C88C05  | H.22345C  |
| H  | 4.848H32  | 3.590525  | 0.498290  |
| C  | 3.777758  | 4.872357  | -2.H09885 |
| H  | 3.309294  | 4.978084  | -3.H0HH73 |
| H  | 4.8H0983  | 4.5H9784  | -2.258HC3 |
| H  | 3.837207  | 5.88HH28  | -H.CC4389 |
| C  | H.H7H754  | 4.C3357C  | -0.C22204 |
| H  | H.409042  | 5.C208C0  | -0.H83CH5 |
| H  | 0.5H8793  | 4.H09935  | 0.090389  |
| H  | 0.C003Si  | 4.820023  | -H.545H72 |
| C  | 4.CC8290  | 2.H34C85  | -4.H22H5C |
| H  | 4.800HC3  | 3.225457  | -4.H90328 |
| H  | 4.838209  | H.7227H9  | -5.H32523 |
| H  | 5.458900  | H.735894  | -3.4C4H39 |
| C  | H.783C82  | 2.C35539  | -4.C995C0 |
| H  | H.CHC7CC  | 3.C5799H  | -4.322738 |
| H  | 0.792CC5  | 2.H8H299  | -4.8397C7 |
| H  | 2.2C7855  | 2.7HC582  | -5.C9097H |
| C  | 2.77C503  | -0.203900 | -3.838H03 |
| H  | 3.C505H2  | -0.7H9229 | -3.4H038C |
| H  | 2.745797  | -0.425388 | -4.9H7950 |
| H  | H.880284  | -0.C3838H | -3.37530H |
| Al | -0.020388 | 2.0573C3  | -2.02C9C8 |
| N  | 0.H32884  | H.042445  | -0.42C848 |

-----  
--  
-----  
--  
Ar\*-Al≡N-Ar\*  
-----  
--

| Atomic<br>Number | Coordinates (Angstroms) |   |   |
|------------------|-------------------------|---|---|
|                  | X                       | Y | Z |

--

|   |          |           |           |
|---|----------|-----------|-----------|
| C | 2.99059C | 2.853894  | -0.007440 |
| C | 4.52H058 | H.237408  | -H.C90342 |
| C | 2.3C0933 | 2.2H2032  | -H.HH9252 |
| C | 4.379878 | 2.73H295  | 0.H758H8  |
| C | 5.H7C39H | H.9C2394  | -0.C8439C |
| C | 3.H379H9 | H.34C39H  | -H.9430H4 |
| H | 4.852003 | 3.28H734  | 0.9905C4  |
| H | 5.HH3780 | 0.584434  | -2.339987 |
| C | 2.2H8239 | 3.77C22C  | 0.937378  |
| H | H.H557HC | 3.504905  | 0.87C782  |
| C | 2.343534 | 5.244530  | 0.4825H0  |
| H | H.748737 | 5.907472  | H.H33075  |
| H | 3.39C300 | 5.5C9994  | 0.528CH8  |
| H | H.993293 | 5.3C7407  | -0.552CC4 |
| C | 2.C42488 | 3.C28477  | 2.4H2088  |
| H | 3.C50C9C | 4.035285  | 2.59HH0C  |
| H | 2.C43478 | 2.57C274  | 2.73HC97  |
| H | H.948C08 | 4.H8C078  | 3.0CH594  |
| C | 2.C49CH8 | 0.552429  | -3.HCHH54 |
| H | 3.3089H8 | -0.3334H0 | -3.H9H348 |
| C | 2.9H9353 | H.347897  | -4.458958 |
| H | 3.970245 | H.C74277  | -4.5H4H40 |
| H | 2.280299 | 2.243H7C  | -4.50803C |
| H | 2.70H432 | 0.72C32C  | -5.343775 |
| C | H.2H0820 | 0.0H8975  | -3.H34878 |
| H | 0.98H929 | -0.49447H | -2.H90043 |
| H | H.08H299 | -0.70449H | -3.957H0C |
| H | 0.4729CH | 0.8H7C45  | -3.28424C |
| C | C.C99535 | H.97380C  | -0.C22C80 |
| H | 7.0490H3 | 0.98785H  | -0.9C995C |
| C | 7.243459 | 3.030409  | -H.CH3884 |
| H | C.9022C3 | 4.038880  | -H.3248C5 |
| H | C.88C995 | 2.835CH2  | -2.C37532 |
| H | 8.34C799 | 3.030585  | -H.C2H973 |

|   |           |           |           |
|---|-----------|-----------|-----------|
| C | 7.277C24  | 2.2HC8CC  | 0.78H475  |
| H | 7.095HC8  | 3.250C34  | H.HH88C3  |
| H | 8.3C9320  | 2.0C5H24  | 0.772989  |
| H | C.838C80  | H.534CC3  | H.5249H7  |
| C | -5.H73779 | 2.HC5H33  | H.H48H32  |
| C | -2.707953 | 2.458529  | -0.278C42 |
| C | -4.985522 | H.58C043  | -0.HH59C3 |
| C | -4.07982H | 2.8344H3  | H.7H8C33  |
| C | -2.8CH049 | 2.999H42  | H.03553H  |
| C | -3.782543 | H.709093  | -0.843C93 |
| H | -5.803570 | H.03040H  | -0.579249 |
| H | -4.200428 | 3.28245H  | 2.709483  |
| C | -C.5244C5 | 2.H8H933  | H.858929  |
| H | -C.320H77 | 2.30498H  | 2.937832  |
| C | -7.35C900 | 0.900CC5  | H.C8H797  |
| H | -C.7985C7 | 0.00C0H4  | H.995750  |
| H | -7.CC507H | 0.7CH9C2  | 0.C3334H  |
| H | -8.27C48C | 0.9C08C7  | 2.28C792  |
| C | -7.33485C | 3.4H5837  | H.39C29H  |
| H | -C.770488 | 4.347HH0  | H.5CH982  |
| H | -8.29052H | 3.4847H8  | H.943283  |
| H | -7.5CH427 | 3.345788  | 0.3H9HH5  |
| C | -3.80579H | H.05H04H  | -2.227H05 |
| H | -4.474798 | 0.H83540  | -2.H05995 |
| C | -2.4850H0 | 0.488552  | -2.7C7C7C |
| H | -H.959CH4 | -0.HHH22H | -2.0HHC04 |
| H | -H.8H0778 | H.277704  | -3.H24983 |
| H | -2.707937 | -0.H7H9H5 | -3.C2HH92 |
| C | -4.47H2H3 | H.99H384  | -3.258H09 |
| H | -5.45740C | 2.3345C2  | -2.90C3C8 |
| H | -4.C08720 | H.470797  | -4.220770 |
| H | -3.84C857 | 2.879C28  | -3.44HH85 |
| C | -H.77C53C | 3.844303  | H.702H52  |
| H | -0.892H29 | 3.83C293  | H.0527HH  |
| C | -2.227445 | 5.3H4032  | H.823C43  |

|   |           |           |           |
|---|-----------|-----------|-----------|
| H | -2.5HH00H | 5.7H42C2  | 0.837C88  |
| H | -H.4H349H | 5.93C05H  | 2.23H783  |
| H | -3.098C5H | 5.4HH703  | 2.492H50  |
| C | -H.354H09 | 3.273997  | 3.070255  |
| H | -0.9959H8 | 2.234800  | 2.983280  |
| H | -2.H92383 | 3.2C7952  | 3.785C08  |
| H | -0.543083 | 3.877894  | 3.507H24  |
| C | -H.472872 | 2.82C732  | -H.0C2787 |
| C | 0.838400  | 3.CC7298  | -2.4C2329 |
| C | -0.208H42 | 2.2275CH  | -0.808885 |
| C | -H.555785 | 3.848408  | -2.02770H |
| C | -0.4H0H43 | 4.249300  | -2.734858 |
| C | 0.9C5803  | 2.CC2838  | -H.480998 |
| H | -2.5HCC2H | 4.334CH4  | -2.207803 |
| H | -0.4833C3 | 5.045940  | -3.479C7H |
| H | H.7348C8  | 4.0H4470  | -2.980CH7 |
| C | 3.22307C  | -2.74H904 | 0.044384  |
| C | 4.77H890  | -H.0C3H94 | H.C4H502  |
| C | 2.CH740H  | -2.HH8C07 | H.H7CCHC  |
| C | 4.5883C8  | -2.5434H5 | -0.22884C |
| C | 5.39C384  | -H.728030 | 0.57C005  |
| C | 3.4H0807  | -H.245C09 | H.973H83  |
| H | 5.0373C9  | -3.08H290 | -H.0C59H9 |
| H | 5.37705C  | -0.409H5C | 2.280048  |
| C | 2.4C7935  | -3.7C2422 | -0.804772 |
| H | H.40038C  | -3.C73232 | -0.573H4H |
| C | 2.904522  | -5.H89997 | -0.4HH823 |
| H | 2.3H7548  | -5.945295 | -0.9C0CC0 |
| H | 3.97H537  | -5.349257 | -0.C42884 |
| H | 2.7C287H  | -5.35774C | 0.CCC8HH  |
| C | 2.C32983  | -3.5349C0 | -2.3H8HH8 |
| H | 3.C7C0C3  | -3.C7828H | -2.C4509C |
| H | 2.3224C4  | -2.520403 | -2.C02328 |
| H | 2.0H38H5  | -4.2552H5 | -2.877549 |
| C | 2.987390  | -0.558755 | 3.27782H  |

|   |           |           |           |
|---|-----------|-----------|-----------|
| H | 3.C3C7H5  | 0.3320HH  | 3.35C882  |
| C | 3.33C073  | -H.4C3954 | 4.483302  |
| H | 4.385732  | -H.79300C | 4.42727H  |
| H | 2.C97575  | -2.35999C | 4.495047  |
| H | 3.H90938  | -0.924222 | 5.434C27  |
| C | H.543539  | -0.052535 | 3.3923C3  |
| H | H.293734  | 0.CH5808  | 2.545C00  |
| H | H.428857  | 0.5432C5  | 4.3H3780  |
| H | 0.8HH853  | -0.870075 | 3.4H7234  |
| C | C.9HHH2C  | -H.C53C75 | 0.409279  |
| H | 7.229889  | -0.C50284 | 0.737597  |
| C | 7.58C488  | -2.C80294 | H.349505  |
| H | 7.283H54  | -3.705C53 | H.078347  |
| H | 7.2949C5  | -2.5H08H3 | 2.397899  |
| H | 8.C8C205  | -2.CH7433 | H.278723  |
| C | 7.4028H8  | -H.859228 | -H.033947 |
| H | 7.25989C  | -2.90HC20 | -H.3C29C9 |
| H | 8.48H370  | -H.C4H387 | -H.H037C7 |
| H | C.87H05C  | -H.20C920 | -H.743424 |
| C | -4.922CH9 | -2.494390 | -H.H83904 |
| C | -2.43H8H8 | -2.45C2H8 | 0.240898  |
| C | -4.82792H | -H.9C3C5C | 0.H09282  |
| C | -3.727900 | -2.9HH747 | -H.792203 |
| C | -2.4925C7 | -2.890485 | -H.H20C70 |
| C | -3.CH4955 | -H.92C939 | 0.833083  |
| H | -5.728883 | -H.58C79C | 0.C00840  |
| H | -3.773885 | -3.30454C | -2.8HH257 |
| C | -C.2CHH79 | -2.C992HH | -H.88C7H0 |
| H | -C.0392HH | -2.95238C | -2.938889 |
| C | -7.HC0478 | -H.449299 | -H.887H24 |
| H | -C.C49440 | -0.58C755 | -2.34H940 |
| H | -7.4575H2 | -H.H70HCC | -0.8C3707 |
| H | -8.08505C | -H.C4049C | -2.457228 |
| C | -7.007928 | -3.902H7C | -H.2CC7CH |
| H | -C.382984 | -4.809047 | -H.289H25 |

|    |           |           |           |
|----|-----------|-----------|-----------|
| H  | -7.94400C | -4.H09450 | -H.8H343C |
| H  | -7.2CCH94 | -3.C9770C | -0.2H4HC7 |
| C  | -3.74C9HH | -H.33H834 | 2.24H482  |
| H  | -4.54C795 | -0.578352 | 2.H43297  |
| C  | -2.5333C8 | -0.574C98 | 2.79738H  |
| H  | -2.H75539 | 0.HC8080  | 2.0CH83C  |
| H  | -H.70384C | -H.243200 | 3.0C0494  |
| H  | -2.828250 | -0.0H49C4 | 3.70H085  |
| C  | -4.25C9C7 | -2.3829H5 | 3.253C33  |
| H  | -5.H39793 | -2.909H08 | 2.85C470  |
| H  | -4.54H405 | -H.900CCC | 4.204529  |
| H  | -3.48225C | -3.H32378 | 3.47H499  |
| C  | -H.2C4027 | -3.45H757 | -H.83C004 |
| H  | -0.38079C | -2.992C57 | -H.377343 |
| C  | -H.H83574 | -4.9783H7 | -H.C2C27C |
| H  | -H.H5889H | -5.22957H | -0.5559HC |
| H  | -0.27772H | -5.389CCH | -2.H0H597 |
| H  | -2.0CH38H | -5.4734H9 | -2.07C050 |
| C  | -H.207278 | -3.HH47C0 | -3.33833H |
| H  | -H.288707 | -2.033350 | -3.5H3894 |
| H  | -2.00C274 | -3.CHC808 | -3.90872C |
| H  | -0.247320 | -3.455H9H | -3.757778 |
| C  | -H.H984C2 | -2.775C49 | H.0473H4  |
| C  | H.H0H430  | -3.C34H24 | 2.4C4C07  |
| C  | 0.055480  | -2.09498H | 0.872375  |
| C  | -H.2C8450 | -3.839329 | H.9C2C59  |
| C  | -0.H43H9H | -4.2459HH | 2.700455  |
| C  | H.23H240  | -2.585999 | H.5409C2  |
| H  | -2.2H9790 | -4.3CH737 | 2.084C92  |
| H  | -0.224030 | -5.0C547C | 3.4H8HH0  |
| H  | H.99C950  | -3.993228 | 2.977825  |
| Al | -0.H2H5H7 | 0.CC8C53  | 0.338437  |
| N  | 0.H3028H  | -0.9957C2 | 0.0C5803  |

-----

--

-----  
--  
Ar\*<sub>2</sub>-Al=N  
-----

-----

| Atomic<br>Number | Coordinates (Angstroms) |           |           |
|------------------|-------------------------|-----------|-----------|
|                  | X                       | Y         | Z         |
| Al               | -0.3H87HH               | -0.8045CC | -0.035987 |
| N                | -H.7C3258               | -H.9807H7 | 0.HH4HH3  |
| H                | 2.793499                | -0.899C87 | -4.232C04 |
| C                | H.880343                | -0.474CC8 | -3.8H2CH4 |
| C                | -0.4057C5               | 0.C40225  | -2.C720HC |
| C                | H.C40H25                | -0.C52592 | -2.429H72 |
| C                | H.000H9H                | 0.23H387  | -4.C339C0 |
| C                | -0.HH5498               | 0.824H55  | -4.04H3C0 |
| C                | 0.4H8C98                | -0.H84278 | -H.830C7H |
| H                | H.20H532                | 0.350HC5  | -5.702232 |
| H                | -0.7843CH               | H.45HC85  | -4.C32434 |
| C                | 2.822847                | -H.308900 | -H.753304 |
| C                | 5.252C0H                | -2.CH97C2 | -H.024089 |
| C                | 2.8C2382                | -2.7H8820 | -H.58CC78 |
| C                | 4.029H54                | -0.559HH2 | -H.59537H |
| C                | 5.2HH4H4                | -H.2349C2 | -H.2385C2 |
| C                | 4.0C2359                | -3.342H7H | -H.H975H0 |
| H                | C.H3C270                | -0.CC37C5 | -H.H22473 |
| H                | 4.078800                | -4.42C902 | -H.08H30C |
| C                | -H.599930               | H.4448C0  | -2.224928 |
| C                | -3.9H7H42               | 3.0505H8  | -H.782499 |
| C                | -2.903HC5               | 0.88C079  | -2.358508 |
| C                | -H.4C3332               | 2.84HH27  | -H.959938 |
| C                | -2.C272C2               | 3.59557H  | -H.708378 |
| C                | -4.03HH4C               | H.C9CH37  | -2.H325C7 |
| H                | -2.505529               | 4.C597H2  | -H.485972 |

-----



|   |           |           |           |
|---|-----------|-----------|-----------|
| H | -5.028829 | H.2CHH9C  | -2.23H8C9 |
| C | H.C88953  | -3.59H309 | -2.0HCHC8 |
| H | 0.7704H7  | -2.98H247 | -H.995C5C |
| C | H.480C22  | -4.80223H | -H.H0H932 |
| H | 2.3490H2  | -5.479C33 | -H.H09H99 |
| H | 0.CH552C  | -5.384382 | -H.443H92 |
| H | H.304828  | -4.488C37 | -0.0C278C |
| C | H.899H72  | -4.057574 | -3.475249 |
| H | 2.03H990  | -3.203093 | -4.H5484H |
| H | H.033330  | -4.C45990 | -3.822524 |
| H | 2.798C0C  | -4.C92987 | -3.5447CC |
| C | 4.HH3028  | 0.94H505  | -H.8792C8 |
| H | 3.09000H  | H.334532  | -H.874H04 |
| C | 4.9H2493  | H.7H2C94  | -0.8H4045 |
| H | 5.983503  | H.450C95  | -0.838003 |
| H | 4.530C87  | H.52H357  | 0.H93785  |
| H | 4.8405HH  | 2.794874  | -H.004548 |
| C | 4.728990  | H.22C90C  | -3.2C779C |
| H | 4.H35572  | 0.792C90  | -4.083225 |
| H | 5.7499HH  | 0.8H3392  | -3.330020 |
| H | 4.792983  | 2.3H55C9  | -3.435530 |
| C | C.5C2HH8  | -3.3H9875 | -0.C843C9 |
| H | 7.3HH93C  | -2.53H94C | -0.49H774 |
| C | C.453272  | -4.H87727 | 0.58447H  |
| H | 5.74H9H0  | -5.0H7CH5 | 0.440C00  |
| H | C.H0C988  | -3.593284 | H.443949  |
| H | 7.43H772  | -4.C29H3C | 0.837599  |
| C | 7.058442  | -4.H55922 | -H.884CH8 |
| H | 7.HC5378  | -3.528875 | -2.78432C |
| H | C.345035  | -4.9C30C3 | -2.H20C98 |
| H | 8.034792  | -4.CH9874 | -H.CC4H39 |
| C | -3.092885 | -0.529498 | -2.897937 |
| H | -2.HC3252 | -H.089374 | -2.7H9CC0 |
| C | -3.328CH2 | -0.472239 | -4.424829 |
| H | -4.244CHH | 0.H00004  | -4.C4882H |

|   |           |           |           |
|---|-----------|-----------|-----------|
| H | -3.4502H8 | -H.489399 | -4.833C8H |
| H | -2.49HH3H | 0.0H03C9  | -4.9485HC |
| C | -4.229CH3 | -H.297747 | -2.2H437C |
| H | -4.H07229 | -H.29735H | -H.H2CH72 |
| H | -4.223973 | -2.345894 | -2.55H857 |
| H | -5.2H7220 | -0.87C52H | -2.4C49H7 |
| C | -5.H58C27 | 3.9HHC35  | -H.577534 |
| H | -C.0H4C29 | 3.222793  | -H.4C3CCH |
| C | -5.4H9329 | 4.782289  | -2.82C877 |
| H | -5.4982H9 | 4.HC0H34  | -3.732559 |
| H | -4.593027 | 5.49C7H4  | -2.98002C |
| H | -C.353HHH | 5.359CH9  | -2.7HCH84 |
| C | -5.084593 | 4.78C95C  | -0.3HHC9H |
| H | -4.28H408 | 5.537834  | -0.389239 |
| H | -4.893947 | 4.H79C07  | 0.585427  |
| H | -C.03HC25 | 5.332804  | -0.HC5842 |
| C | -0.H84H24 | 3.C82940  | -2.0925H2 |
| H | -0.35H974 | 4.55507C  | -H.43925H |
| C | -0.070238 | 4.2C2074  | -3.52444C |
| H | 0.732254  | 5.0H8590  | -3.5CH77C |
| H | -H.0H2328 | 4.7400C0  | -3.8357C8 |
| H | 0.H7CH2C  | 3.475783  | -4.253079 |
| C | H.H50C2H  | 3.058H29  | -H.CC9023 |
| H | H.9H2C37  | 3.849C38  | -H.5837C2 |
| H | H.499544  | 2.339550  | -2.4H8HC8 |
| H | H.090H4H  | 2.54CH4H  | -0.C99534 |
| H | H.H4C045  | 0.5C5343  | 4.935H52  |
| C | 0.492720  | 0.0H8455  | 4.2509C0  |
| C | -H.2H5828 | -H.27H772 | 2.489324  |
| C | 0.C24320  | 0.253C02  | 2.8C2200  |
| C | -0.49277C | -0.83CHC9 | 4.7CH979  |
| C | -H.39270H | -H.438592 | 3.872829  |
| C | -0.H84HH3 | -0.45C772 | H.93C72C  |
| H | -0.588483 | -0.98C397 | 5.84H203  |
| H | -2.245C70 | -2.0H0074 | 4.24C282  |

|   |           |           |          |
|---|-----------|-----------|----------|
| C | H.549743  | H.359705  | 2.47822C |
| C | 3.29C494  | 3.537872  | 2.0H3C82 |
| C | H.008954  | 2.C39088  | 2.H52332 |
| C | 2.947437  | H.H837H3  | 2.CH897H |
| C | 3.7975H3  | 2.2808C8  | 2.3828H7 |
| C | H.90H395  | 3.C983H0  | H.9HC258 |
| H | 4.8792CH  | 2.H537H3  | 2.4878H4 |
| H | H.5008CH  | 4.C80325  | H.CC2H03 |
| C | -2.25939H | -H.7C37H5 | H.523590 |
| C | -4.74257H | -3.H00037 | 0.824704 |
| C | -2.227CC2 | -3.H5C22H | 0.935724 |
| C | -3.59245H | -H.090992 | H.70CH24 |
| C | -4.732928 | -H.73CC93 | H.332384 |
| C | -3.5C2542 | -3.7508C3 | 0.C27942 |
| H | -5.C9250C | -H.22C28H | H.449957 |
| H | -3.592787 | -4.80059H | 0.327C90 |
| C | -0.50CH24 | 2.88558C  | 2.H5H287 |
| H | -0.9795CC | 2.03423H  | H.C38393 |
| C | -0.93888C | 4.HCC3H8  | H.423H57 |
| H | -0.CC93HC | 5.0CC824  | 2.000H37 |
| H | -2.03H38H | 4.HC8H50  | H.294889 |
| H | -0.4859C7 | 4.248358  | 0.430047 |
| C | -H.0C9739 | 2.93809H  | 3.590733 |
| H | -0.93053C | H.9943HH  | 4.H30277 |
| H | -2.H49C8C | 3.H594H2  | 3.5C3399 |
| H | -0.57H2C2 | 3.739328  | 4.HCH832 |
| C | 3.532309  | -0.H5H9HC | 3.07C229 |
| H | 2.C92C53  | -0.844938 | 3.227CH2 |
| C | 4.448HC0  | -0.790092 | 2.020837 |
| H | 5.325049  | -0.HC0272 | H.80HC78 |
| H | 3.9H3740  | -0.954097 | H.07C740 |
| H | 4.8H8392  | -H.7C5834 | 2.375C5H |
| C | 4.25399H  | -0.003380 | 4.430830 |
| H | 3.590058  | 0.44H293  | 5.H89235 |
| H | 5.H4HC48  | 0.C44704  | 4.342C05 |

|   |           |           |           |
|---|-----------|-----------|-----------|
| H | 4.58938H  | -0.987584 | 4.7988C9  |
| C | 4.24H878  | 4.7HH593  | H.79H4H3  |
| H | 5.2CH203  | 4.2944C7  | H.70C387  |
| C | 3.940530  | 5.48C500  | 0.494229  |
| H | 2.952H47  | 5.972284  | 0.537042  |
| H | 3.947353  | 4.8H9007  | -0.380884 |
| H | 4.C9H073  | C.2783HH  | 0.333C0C  |
| C | 4.2H7035  | 5.C53840  | 3.0H4539  |
| H | 4.950209  | C.470285  | 2.900909  |
| H | 4.447577  | 5.H00897  | 3.939H99  |
| H | 3.2H7C5C  | C.H04787  | 3.H33340  |
| C | -H.22494H | -4.20834C | H.4C8388  |
| H | -0.230073 | -3.733492 | H.47C95H  |
| C | -H.H88HC8 | -5.4C9532 | 0.580C47  |
| H | -2.043575 | -C.H25899 | 0.80C000  |
| H | -0.27C80C | -C.05H738 | 0.783770  |
| H | -H.2H85H8 | -5.22724C | -0.489C29 |
| C | -H.5C5H24 | -4.CCC3CH | 2.903789  |
| H | -H.438H44 | -3.8C7802 | 3.C43004  |
| H | -0.90C324 | -5.502880 | 3.H95043  |
| H | -2.C05895 | -5.02827C | 2.957728  |
| C | -C.077327 | -3.790250 | 0.5C5503  |
| H | -5.855829 | -4.85459H | 0.3C93C3  |
| C | -C.77H707 | -3.2HC543 | -0.C8C904 |
| H | -C.H38C2H | -3.3432H8 | -H.57C897 |
| H | -C.973390 | -2.H39H90 | -0.5C9729 |
| H | -7.734554 | -3.724C30 | -0.8C5752 |
| C | -7.0HC784 | -3.727382 | H.788803  |
| H | -C.530HC7 | -4.H3240H | 2.C9H043  |
| H | -7.93344C | -4.3H05HC | H.597038  |
| H | -7.32C584 | -2.C92443 | 2.008497  |
| C | -3.C38485 | 0.320390  | 2.28572C  |
| H | -2.C38050 | 0.5C2027  | 2.CC4302  |
| C | -4.C07732 | 0.450C38  | 3.473882  |
| H | -4.352927 | -0.2C789H | 4.2C880H  |

|   |           |          |          |
|---|-----------|----------|----------|
| H | -5.C5H25H | 0.2C5H95 | 3.H7H338 |
| H | -4.55573H | H.4C7502 | 3.897978 |
| C | -3.952C50 | H.34H3HH | H.H8043H |
| H | -3.92808C | 2.3C5974 | H.583457 |
| H | -4.948398 | H.HCC298 | 0.74309H |
| H | -3.224088 | H.28H359 | 0.3C20H5 |

--

Al=N-Ar\*<sub>2</sub>

--

| Atomic<br>Number | Coordinates (Angstroms) |   |   |
|------------------|-------------------------|---|---|
|                  | X                       | Y | Z |

--

|   |          |           |           |
|---|----------|-----------|-----------|
| C | 3.438898 | H.94H347  | -0.89284H |
| C | 4.427443 | 0.0372C4  | -2.C744CC |
| C | 2.5HH32H | H.08445C  | -H.5CC890 |
| C | 4.8257H8 | H.7C7CC7  | -H.08H9C0 |
| C | 5.3508C3 | 0.837522  | -H.98450H |
| C | 3.0350H9 | 0.H5H9HH  | -2.5082H5 |
| H | 5.503070 | 2.43828H  | -0.5539HH |
| H | 4.7973HC | -0.C79793 | -3.4H5283 |
| C | 3.03C827 | 3.20H444  | -0.HH7847 |
| H | H.953574 | 3.H585C8  | 0.08C837  |
| C | 3.27797C | 4.4CC493  | -0.973579 |
| H | 2.93H078 | 5.3C337H  | -0.433HCH |
| H | 4.352848 | 4.590735  | -H.H87320 |
| H | 2.744534 | 4.4H3852  | -H.932807 |
| C | 3.7C8CC7 | 3.34839H  | H.232335  |
| H | 4.830C93 | 3.C03705  | H.087H83  |
| H | 3.720H87 | 2.422C8H  | H.825CC8  |
| H | 3.308C35 | 4.H5C749  | H.823875  |

|   |           |           |           |
|---|-----------|-----------|-----------|
| C | 2.202070  | -0.C54C07 | -3.503899 |
| H | 2.85H28C  | -H.4930H5 | -3.80C5C8 |
| C | H.92C494  | 0.H47737  | -4.79CC22 |
| H | 2.854878  | 0.589534  | -5.H93277 |
| H | H.205730  | 0.957884  | -4.CHC458 |
| H | H.50H574  | -0.5HC472 | -5.5C85H9 |
| C | 0.9HC237  | -H.27H853 | -2.954039 |
| H | H.059975  | -H.C534H0 | -H.93C348 |
| H | 0.CH2534  | -2.H05354 | -3.59989C |
| H | 0.09H240  | -0.55H253 | -2.928H50 |
| C | C.835C2C  | 0.75820H  | -2.333222 |
| H | 7.H24827  | -0.308C34 | -2.304984 |
| C | 7.0CH858  | H.257439  | -3.78037C |
| H | C.7C4900  | 2.3HC2H0  | -3.8C543C |
| H | C.4C7838  | 0.C82287  | -4.50C777 |
| H | 8.H25CH9  | H.H73947  | -4.0C0478 |
| C | 7.7543C9  | H.5297H4  | -H.37283H |
| H | 7.5998CC  | 2.CH7C2C  | -H.4CC444 |
| H | 8.8H0240  | H.32522C  | -H.CH202H |
| H | 7.583390  | H.253H02  | -0.3229C9 |
| C | -5.0872H7 | 2.32H427  | H.H34935  |
| C | -2.5C274C | H.87CC77  | -0.H34HH7 |
| C | -4.994245 | H.C7982H  | -0.H0C945 |
| C | -3.897759 | 2.80H988  | H.700593  |
| C | -2.C50H79 | 2.C23240  | H.079232  |
| C | -3.7C7828 | H.47275C  | -0.77303C |
| H | -5.90C030 | H.33C727  | -0.C0050H |
| H | -3.952799 | 3.37H42H  | 2.C32455  |
| C | -C.42C4C7 | 2.5944H3  | H.809025  |
| H | -C.205C4H | 2.97C442  | 2.82H800  |
| C | -7.2895H4 | H.328043  | H.9C4022  |
| H | -C.7520C3 | 0.54H877  | 2.5HC907  |
| H | -7.57303C | 0.9H859H  | 0.98H379  |
| H | -8.220C22 | H.558573  | 2.508043  |
| C | -7.H97297 | 3.C97295  | H.05H098  |

|   |           |           |           |
|---|-----------|-----------|-----------|
| H | -C.59H093 | 4.CH3C4C  | 0.9C845H  |
| H | -8.H39HH8 | 3.947H99  | H.5C87C7  |
| H | -7.44C829 | 3.3C5CH7  | 0.02952C  |
| C | -3.927244 | 0.925C00  | -2.20H2C3 |
| H | -4.C5H547 | 0.H035C4  | -2.098550 |
| C | -2.7H7C59 | 0.33C785  | -2.9422C0 |
| H | -2.H023C8 | -0.285389 | -2.287H98 |
| H | -2.08H4H0 | H.HHH703  | -3.388H99 |
| H | -3.09H959 | -0.3025C9 | -3.757C99 |
| C | -4.59H950 | 2.000273  | -3.097908 |
| H | -5.52CH02 | 2.383907  | -2.CC0539 |
| H | -4.823234 | H.57C587  | -4.090037 |
| H | -3.9H4705 | 2.8558H3  | -3.2494C0 |
| C | -H.47C05H | 3.425740  | H.C30403  |
| H | -0.553C73 | 3.0C4898  | H.H4H838  |
| C | -H.C258H8 | 4.9HH4C9  | H.230377  |
| H | -H.734904 | 5.02H758  | 0.H40430  |
| H | -0.7434H9 | 5.490440  | H.552409  |
| H | -2.5H7CHH | 5.352C47  | H.708H35  |
| C | -H.278C59 | 3.298CH5  | 3.H509H7  |
| H | -H.203C27 | 2.24753C  | 3.4C483H  |
| H | -2.HH074C | 3.7C053H  | 3.707053  |
| H | -0.34789H | 3.80C38H  | 3.45H803  |
| C | -H.272375 | H.89CH34  | -0.920C44 |
| C | 0.897358  | 2.5208C7  | -2.580378 |
| C | -0.0799C2 | H.07993H  | -0.792005 |
| C | -H.3223C9 | 2.959724  | -H.85HC33 |
| C | -0.273HHC | 3.2C2473  | -2.7H4H80 |
| C | H.045822  | H.49C097  | -H.CH7H39 |
| H | -2.2350C3 | 3.55C47C  | -H.879247 |
| H | -0.34989H | 4.077357  | -3.438748 |
| H | H.7C5599  | 2.7C4CHC  | -3.H94279 |
| C | 3.28252H  | -H.98H49C | 0.74H289  |
| C | 4.3C875C  | -0.28834C | 2.C7C4C0  |
| C | 2.407455  | -H.340CH0 | H.C77574  |

|   |          |           |           |
|---|----------|-----------|-----------|
| C | 4.CC2793 | -H.72905H | 0.78CC7C  |
| C | 5.232H5H | -0.8C0772 | H.73240H  |
| C | 2.982597 | -0.572883 | 2.737830  |
| H | 5.30CH89 | -2.253578 | 0.0820H9  |
| H | 4.78883H | 0.3C55CH  | 3.44503C  |
| C | 2.789997 | -3.HH7HC3 | -0.HC4C42 |
| H | H.7H82H3 | -2.9C7075 | -0.35377C |
| C | 2.954HCH | -4.473547 | 0.5C42H3  |
| H | 2.575273 | -5.2934H4 | -0.0C9379 |
| H | 4.02H508 | -4.CC3987 | 0.7C8H57  |
| H | 2.4H3798 | -4.50337C | H.5H8H99  |
| C | 3.5H8557 | -3.2H5078 | -H.5HC458 |
| H | 4.528587 | -3.C4H8H9 | -H.398CC4 |
| H | 3.C23372 | -2.23C202 | -H.990C37 |
| H | 2.9C2H75 | -3.88207C | -2.H94748 |
| C | 2.333CC7 | -0.H42078 | 4.085093  |
| H | 2.540CC4 | 0.94044H  | 4.H8HH73  |
| C | 3.0C4970 | -0.853408 | 5.254450  |
| H | 4.H4483H | -0.C474C9 | 5.2C505H  |
| H | 2.9302H8 | -H.945774 | 5.H84375  |
| H | 2.C42C93 | -0.5H7535 | C.2HC794  |
| C | 0.825753 | -0.335795 | 4.3H80HH  |
| H | 0.H902H7 | 0.0334H9  | 3.4997C4  |
| H | 0.535373 | 0.222H30  | 5.22309H  |
| H | 0.5CC543 | -H.392399 | 4.4C3829  |
| C | C.7405CC | -0.C2338H | H.835525  |
| H | C.908948 | 0.4C2839  | H.709HH2  |
| C | 7.2C2728 | -H.0HC957 | 3.237938  |
| H | 7.077430 | -2.088070 | 3.42478H  |
| H | C.77H380 | -0.447284 | 4.040504  |
| H | 8.348705 | -0.8387C4 | 3.3H0377  |
| C | 7.5C2034 | -H.3C3588 | 0.7C8H29  |
| H | 7.49984H | -2.45534C | 0.9H3H30  |
| H | 8.C23C7H | -H.078C02 | 0.842CH9  |
| H | 7.2208C8 | -H.H37037 | -0.2509H0 |



|   |           |           |           |
|---|-----------|-----------|-----------|
| C | -5.237970 | -2.H52334 | -H.HH3C70 |
| C | -2.C00C2C | -H.78040C | -0.0CCH25 |
| C | -5.02H958 | -H.508C59 | 0.HH08C5  |
| C | -4.HH2247 | -2.C43057 | -H.79H422 |
| C | -2.808775 | -2.49HCH0 | -H.287975 |
| C | -3.73784C | -H.342CC5 | 0.CC94CH  |
| H | -5.878253 | -H.H48335 | 0.C852H4  |
| H | -4.2CC225 | -3.H922C8 | -2.7233C4 |
| C | -C.C39524 | -2.404798 | -H.C5CHHH |
| H | -C.522700 | -2.8H3723 | -2.C75C44 |
| C | -7.479982 | -H.HH7720 | -H.7C0HCC |
| H | -C.97CC05 | -0.3C0502 | -2.38H553 |
| H | -7.C55425 | -0.C780C8 | -0.7C5458 |
| H | -8.4C534H | -H.33220H | -2.20C558 |
| C | -7.3C4954 | -3.4C9345 | -0.804350 |
| H | -C.772357 | -4.39C425 | -0.7470HC |
| H | -8.352C5C | -3.7HH745 | -H.232455 |
| H | -7.5H975H | -3.H04775 | 0.224793  |
| C | -3.758H7C | -0.820979 | 2.HH4CCC  |
| H | -4.4C8533 | 0.0H939C  | 2.094479  |
| C | -2.4CCH80 | -0.284358 | 2.74334H  |
| H | -H.9070C8 | 0.348H05  | 2.04C72C  |
| H | -H.8H4H08 | -H.09CC98 | 3.08C022  |
| H | -2.729427 | 0.33H28C  | 3.CH9H84  |
| C | -4.35C7H9 | -H.902258 | 3.0494C2  |
| H | -5.3345CC | -2.2CH34C | 2.C93583  |
| H | -4.48C878 | -H.495738 | 4.0C70C0  |
| H | -3.C8HHH8 | -2.7C9247 | 3.HH8H88  |
| C | -H.C80789 | -3.25HHC3 | -H.988H43 |
| H | -0.728597 | -2.809595 | -H.CC7H38 |
| C | -H.C73400 | -4.73539C | -H.55059H |
| H | -H.545H94 | -4.8422H0 | -0.4C55C4 |
| H | -0.848473 | -5.274H3H | -2.047450 |
| H | -2.C20C44 | -5.223883 | -H.83542C |
| C | -H.7C0037 | -3.H9C940 | -3.52C259 |

|    |           |           |           |
|----|-----------|-----------|-----------|
| H  | -H.79229C | -2.HC7599 | -3.905500 |
| H  | -2.C49592 | -3.727C43 | -3.900977 |
| H  | -0.883H99 | -3.700H9H | -3.9C427C |
| C  | -H.28700C | -H.9C2H89 | 0.CC5203  |
| C  | 0.72HC02  | -2.88C302 | 2.40874C  |
| C  | -0.0804C3 | -H.HCH825 | 0.7CH888  |
| C  | -H.4H4707 | -3.H5H7HH | H.429CH5  |
| C  | -0.4C70H3 | -3.C0744H | 2.3402H5  |
| C  | 0.95240H  | -H.747C35 | H.CH7H82  |
| H  | -2.353C42 | -3.C97C92 | H.327534  |
| H  | -0.C385HC | -4.499494 | 2.947HH3  |
| H  | H.529999  | -3.2HC250 | 3.0C4532  |
| Al | H.H33H57  | H.3H4C9C  | H.580945  |
| N  | 0.H9C298  | 0.H7798H  | 0.3H9554  |

-----  
--  
-----  
--  
M062X/Def2-TZVP  
-----  
--  
-----  
--  
F-Al≡N-F  
-----  
--

| Atomic<br>Number | Coordinates (Angstroms) |           |           |
|------------------|-------------------------|-----------|-----------|
|                  | X                       | Y         | Z         |
| Al               | 0.562558                | -0.161030 | 0.000446  |
| N                | -1.010979               | 0.487323  | 0.000160  |
| F                | -2.204662               | -0.190055 | -0.000328 |
| F                | 2.178395                | 0.043625  | -0.000441 |

-----

--

-----  
--  
F2-Al=N

--

| Atomic<br>Number | Coordinates (Angstroms) |   |   |
|------------------|-------------------------|---|---|
|                  | X                       | Y | Z |

-----  
--

|    |           |           |           |
|----|-----------|-----------|-----------|
| Al | 0.000723  | -0.033672 | 0.000499  |
| N  | -0.527436 | -1.793075 | -0.000277 |
| F  | 1.581589  | 0.347328  | -0.000257 |
| F  | -1.172405 | 1.095923  | -0.000249 |

-----  
--

-----  
--  
Al=N-F2

--

| Atomic<br>Number | Coordinates (Angstroms) |   |   |
|------------------|-------------------------|---|---|
|                  | X                       | Y | Z |

-----  
--

|    |           |           |           |
|----|-----------|-----------|-----------|
| Al | 1.616118  | -0.000149 | -0.000839 |
| N  | -0.244733 | -0.000088 | 0.005063  |
| F  | -1.071731 | 1.088943  | -0.001363 |
| F  | -1.072314 | -1.088659 | -0.001363 |

-----  
--

-----  
--  
F-Al≡N-F-TS1

--

| Atomic<br>Number | Coordinates (Angstroms) |   |   |
|------------------|-------------------------|---|---|
|                  | X                       | Y | Z |

--

|    |           |           |           |
|----|-----------|-----------|-----------|
| N  | 1.179207  | 0.728014  | -0.004125 |
| Al | -0.485961 | 0.199429  | 0.004706  |
| F  | 1.829440  | -0.587095 | -0.000065 |
| F  | -2.044657 | -0.267202 | -0.003524 |

--

F-Al≡N-F-TS2

--

| Atomic<br>Number | Coordinates (Angstroms) |   |   |
|------------------|-------------------------|---|---|
|                  | X                       | Y | Z |

--

|    |           |           |           |
|----|-----------|-----------|-----------|
| Al | 1.500576  | -0.104878 | -0.065419 |
| N  | -0.354217 | -0.027372 | 0.493091  |
| F  | -0.767909 | 1.162344  | -0.132635 |
| F  | -1.124088 | -0.989564 | -0.156387 |

--

HO-Al≡N-OH

--

| Atomic<br>Number | Coordinates (Angstroms) |   |   |
|------------------|-------------------------|---|---|
|                  | X                       | Y | Z |

--

|    |           |           |           |
|----|-----------|-----------|-----------|
| Al | -0.577081 | -0.302242 | 0.003701  |
| N  | 0.986332  | 0.343434  | -0.097597 |
| O  | 2.271736  | -0.010208 | 0.157830  |
| H  | 2.695975  | -0.104053 | -0.704399 |
| O  | -2.203383 | 0.099807  | -0.018254 |
| H  | -2.645076 | 0.912367  | 0.222867  |

-----  
 --  
 -----  
 --

(OH)<sub>2</sub>-Al≡N

-----  
 --

| Atomic<br>Number | Coordinates (Angstroms) |   |   |
|------------------|-------------------------|---|---|
|                  | X                       | Y | Z |

-----  
 --

|    |           |           |           |
|----|-----------|-----------|-----------|
| Al | 0.229159  | 0.213448  | -0.002138 |
| N  | -1.361723 | 0.907796  | 0.002658  |
| O  | 1.879874  | -0.011804 | 0.029519  |
| H  | 2.415047  | -0.792525 | -0.098181 |
| O  | -1.158066 | -0.883083 | -0.100808 |
| H  | -1.636525 | -1.177772 | 0.677684  |

-----  
 --  
 -----  
 --

Al≡N-(OH)<sub>2</sub>

-----  
 --

| Atomic<br>Number | Coordinates (Angstroms) |   |   |
|------------------|-------------------------|---|---|
|                  | X                       | Y | Z |

-----  
 --

|    |          |          |           |
|----|----------|----------|-----------|
| Al | 1.596676 | 0.000045 | -0.000003 |
|----|----------|----------|-----------|

|   |           |           |           |
|---|-----------|-----------|-----------|
| N | -0.230360 | 0.000023  | 0.000022  |
| O | -1.023092 | 1.137834  | -0.109876 |
| H | -1.388128 | 1.295469  | 0.771987  |
| O | -1.022937 | -1.137912 | 0.109865  |
| H | -1.387913 | -1.295583 | -0.772017 |

HO-Al≡N-OH-TS1

| Atomic<br>Number | Coordinates (Angstroms) |   |   |
|------------------|-------------------------|---|---|
|                  | X                       | Y | Z |

|    |           |           |           |
|----|-----------|-----------|-----------|
| Al | 0.173419  | 0.126817  | 0.000448  |
| N  | -1.247180 | 1.175758  | 0.005302  |
| O  | 1.818264  | -0.146946 | 0.017427  |
| H  | 2.557333  | 0.456169  | -0.018094 |
| O  | -1.120725 | -0.986844 | -0.100476 |
| H  | -1.661826 | -1.264780 | 0.639536  |

HO-Al≡N-OH-TS2

| Atomic<br>Number | Coordinates (Angstroms) |   |   |
|------------------|-------------------------|---|---|
|                  | X                       | Y | Z |

|    |           |           |           |
|----|-----------|-----------|-----------|
| Al | -1.429577 | -0.393302 | -0.027318 |
| N  | 0.378864  | -0.150308 | 0.307476  |
| O  | 1.559486  | -0.606010 | -0.194400 |
| H  | 2.230803  | -0.451122 | 0.481293  |
| O  | 0.115216  | 1.211067  | -0.164443 |
| H  | 0.304038  | 1.775759  | 0.592260  |

--

H-Al $\equiv$ N-H

--

| Atomic<br>Number | Coordinates (Angstroms) |   |   |
|------------------|-------------------------|---|---|
|                  | X                       | Y | Z |

--

|    |           |           |           |
|----|-----------|-----------|-----------|
| Al | -0.559668 | 0.000920  | 0.000110  |
| N  | 1.048016  | -0.002894 | -0.000029 |
| H  | 2.045825  | 0.010935  | -0.000380 |
| H  | -2.106260 | -0.002639 | -0.000852 |

--

H<sub>2</sub>-Al $\equiv$ N

--

| Atomic<br>Number | Coordinates (Angstroms) |   |   |
|------------------|-------------------------|---|---|
|                  | X                       | Y | Z |

--

|    |           |           |           |
|----|-----------|-----------|-----------|
| Al | 0.005759  | -0.518837 | 0.000000  |
| N  | 0.005759  | 1.294097  | -0.000000 |
| H  | -1.482818 | -1.019456 | 0.000000  |

|   |          |           |          |
|---|----------|-----------|----------|
| H | 1.367641 | -1.294342 | 0.000000 |
|---|----------|-----------|----------|

-----

--

-----

--

Al≡N-H2

-----

--

| Atomic<br>Number | Coordinates (Angstroms) |   |   |
|------------------|-------------------------|---|---|
|                  | X                       | Y | Z |

-----

--

|    |           |           |           |
|----|-----------|-----------|-----------|
| Al | -0.787959 | 0.000014  | 0.000007  |
| N  | 1.006878  | 0.000044  | -0.000054 |
| H  | 1.598041  | 0.821909  | 0.000142  |
| H  | 1.597281  | -0.822405 | 0.000142  |

-----

--

-----

--

H-Al≡N-H-TS1

-----

--

| Atomic<br>Number | Coordinates (Angstroms) |   |   |
|------------------|-------------------------|---|---|
|                  | X                       | Y | Z |

-----

--

|    |           |           |           |
|----|-----------|-----------|-----------|
| Al | 0.014577  | -0.518592 | 0.000000  |
| N  | 0.014577  | 1.284228  | 0.000000  |
| H  | 1.252035  | -1.474404 | 0.000000  |
| H  | -1.543573 | -0.773492 | -0.000000 |

-----

--

-----

--



H-Al≡N-H-TS2

---

--

| Atomic<br>Number | Coordinates (Angstroms) |           |           |
|------------------|-------------------------|-----------|-----------|
|                  | X                       | Y         | Z         |
| Al               | 0.518933                | -0.009744 | 0.000425  |
| N                | -1.279095               | 0.081908  | -0.000209 |
| H                | 0.629691                | -1.586143 | -0.001763 |
| H                | 1.577846                | 1.139461  | -0.002302 |

---

--

---

--

3HC-Al≡N-CH3

---

--

| Atomic<br>Number | Coordinates (Angstroms) |           |           |
|------------------|-------------------------|-----------|-----------|
|                  | X                       | Y         | Z         |
| H                | -2.865230               | -0.746801 | -0.701041 |
| C                | -2.487970               | 0.001193  | -0.002895 |
| H                | -2.871761               | 0.976008  | -0.301750 |
| H                | -2.872733               | -0.231585 | 0.990205  |
| Al               | -0.560442               | -0.001347 | 0.006353  |
| N                | 1.052609                | 0.002631  | -0.011311 |
| C                | 2.468731                | -0.000518 | 0.001441  |
| H                | 2.884231                | 0.993743  | -0.207434 |
| H                | 2.888511                | -0.683451 | -0.748213 |
| H                | 2.869899                | -0.312873 | 0.973544  |

---

--

---

--  
(CH3)2-Al≡N

---

--

| Atomic<br>Number | Coordinates (Angstroms) |           |           |
|------------------|-------------------------|-----------|-----------|
|                  | X                       | Y         | Z         |
| N                | 0.121910                | 1.901995  | 0.000146  |
| Al               | -0.010096               | 0.084643  | -0.000305 |
| C                | -1.801254               | -0.679045 | 0.000844  |
| H                | -1.977154               | -1.229403 | -0.926059 |
| H                | -2.578628               | 0.078718  | 0.094042  |
| H                | -1.914706               | -1.385223 | 0.826011  |
| C                | 1.725366                | -0.803825 | -0.000662 |
| H                | 2.552608                | -0.104382 | -0.118196 |
| H                | 1.779513                | -1.533276 | -0.811465 |
| H                | 1.871578                | -1.343539 | 0.937516  |

---

--  
Al≡N-(CH3)2

---

--

| Atomic<br>Number | Coordinates (Angstroms) |           |           |
|------------------|-------------------------|-----------|-----------|
|                  | X                       | Y         | Z         |
| H                | -0.369362               | 2.093305  | 0.000269  |
| C                | -1.005165               | 1.202471  | -0.000020 |
| H                | -1.652215               | 1.256407  | 0.884709  |
| H                | -1.651498               | 1.256492  | -0.885275 |
| N                | -0.199950               | -0.000056 | 0.000157  |
| Al               | 1.600994                | -0.000179 | -0.000019 |

---

|   |           |           |           |
|---|-----------|-----------|-----------|
| C | -1.005689 | -1.202221 | -0.000019 |
| H | -1.653155 | -1.255159 | -0.884451 |
| H | -0.370295 | -2.093231 | -0.001319 |
| H | -1.651619 | -1.256596 | 0.885456  |

-----  
 --  
 -----  
 --  
 3HC-Al≡N-CH3-TS1  
 -----

--  
 Atomic Coordinates (Angstroms)  
 Number X Y Z  
 -----

|    |           |           |           |
|----|-----------|-----------|-----------|
| N  | -0.336683 | -1.863916 | -0.000889 |
| Al | 0.030305  | -0.081030 | 0.001634  |
| C  | -1.660455 | 0.894196  | -0.000874 |
| H  | -1.748990 | 1.500455  | 0.903042  |
| H  | -2.519997 | 0.225612  | -0.043584 |
| H  | -1.711601 | 1.567111  | -0.859322 |
| C  | 1.867263  | 0.558261  | 0.000323  |
| H  | 2.583851  | -0.246148 | 0.164636  |
| H  | 2.014251  | 1.309107  | 0.779201  |
| H  | 2.104452  | 1.029922  | -0.955691 |

-----  
 --  
 -----  
 --  
 3HC-Al≡N-CH3-TS2  
 -----

--  
 Atomic Coordinates (Angstroms)  
 Number X Y Z  
 -----

--

|    |           |           |           |
|----|-----------|-----------|-----------|
| Al | -0.948543 | -0.913033 | 0.002794  |
| N  | 0.626202  | -0.286842 | -0.006688 |
| C  | -1.163816 | 1.211756  | 0.001223  |
| H  | -1.485438 | 1.412810  | -1.016950 |
| H  | -0.318553 | 1.828006  | 0.278563  |
| H  | -1.985663 | 1.341722  | 0.701629  |
| C  | 1.957396  | 0.170462  | -0.005486 |
| H  | 1.952405  | 1.227438  | 0.304526  |
| H  | 2.456404  | 0.117207  | -0.978963 |
| H  | 2.567009  | -0.343173 | 0.747262  |

--

3HSi-Al≡N-SiH3

--

| Atomic<br>Number | Coordinates (Angstroms) |           |           |
|------------------|-------------------------|-----------|-----------|
|                  | X                       | Y         | Z         |
| Al               | -0.500356               | -0.005243 | -0.006704 |
| N                | 1.135749                | -0.007877 | -0.011300 |
| Si               | -2.923765               | 0.002780  | 0.003882  |
| Si               | 2.822593                | 0.003332  | 0.004308  |
| H                | -3.405923               | -1.105703 | -0.840553 |
| H                | -3.391759               | 1.294366  | -0.532590 |
| H                | -3.392028               | -0.171776 | 1.390985  |
| H                | 3.385588                | 1.233979  | -0.613238 |
| H                | 3.402356                | -1.147220 | -0.736920 |
| H                | 3.372562                | -0.065912 | 1.383913  |

--

--  
(SiH3)2-Al≡N

---

--

| Atomic<br>Number | Coordinates (Angstroms) |           |           |
|------------------|-------------------------|-----------|-----------|
|                  | X                       | Y         | Z         |
| N                | -0.008634               | 2.100932  | -0.014488 |
| Al               | 0.000839                | 0.325167  | 0.026070  |
| Si               | 2.301761                | -0.521377 | -0.005159 |
| H                | 3.278967                | 0.574790  | 0.145523  |
| H                | 2.538210                | -1.217735 | -1.288604 |
| H                | 2.484388                | -1.489752 | 1.098552  |
| Si               | -2.299453               | -0.524589 | -0.004285 |
| H                | -2.459624               | -1.547048 | 1.053218  |
| H                | -3.283056               | 0.556424  | 0.201376  |
| H                | -2.541657               | -1.166850 | -1.315344 |

---

--  
-----  
--  
Al≡N-(SiH3)2

---

--

| Atomic<br>Number | Coordinates (Angstroms) |           |           |
|------------------|-------------------------|-----------|-----------|
|                  | X                       | Y         | Z         |
| H                | -2.592167               | 0.257811  | 0.158105  |
| Si               | -1.500412               | -0.735200 | 0.000185  |
| H                | -1.573616               | -1.703708 | 1.116853  |
| H                | -1.717981               | -1.474288 | -1.262816 |
| N                | -0.000040               | 0.124986  | -0.000035 |
| Al               | -0.005023               | 1.956568  | 0.000033  |

|    |          |           |           |
|----|----------|-----------|-----------|
| Si | 1.504096 | -0.728701 | -0.000179 |
| H  | 1.570128 | -1.715416 | -1.101192 |
| H  | 2.590367 | 0.265952  | -0.184025 |
| H  | 1.737272 | -1.446020 | 1.272802  |

-----  
 --  
 -----  
 --  
 3HSi-Al≡N-SiH3-TS1  
 -----

| Atomic<br>Number | Coordinates (Angstroms) |           |           |
|------------------|-------------------------|-----------|-----------|
|                  | X                       | Y         | Z         |
| N                | 0.022274                | 2.098288  | 0.002709  |
| Al               | -0.002925               | 0.333902  | -0.005272 |
| Si               | -2.319117               | -0.521731 | 0.000969  |
| H                | -3.294833               | 0.593264  | 0.041611  |
| H                | -2.508184               | -1.391153 | 1.192808  |
| H                | -2.538593               | -1.331185 | -1.227241 |
| Si               | 2.312545                | -0.531016 | 0.000678  |
| H                | 2.486276                | -1.469989 | -1.139607 |
| H                | 3.291170                | 0.575832  | -0.114251 |
| H                | 2.538286                | -1.267052 | 1.273187  |

-----  
 --  
 -----  
 --  
 3HSi-Al≡N-SiH3-TS2  
 -----

| Atomic<br>Number | Coordinates (Angstroms) |   |   |
|------------------|-------------------------|---|---|
|                  | X                       | Y | Z |

--

|    |           |           |           |
|----|-----------|-----------|-----------|
| Al | -0.703742 | 1.383558  | -0.025545 |
| N  | 0.673396  | 0.449844  | 0.108734  |
| Si | -1.932085 | -0.734870 | -0.000558 |
| H  | -3.386925 | -0.541883 | -0.184023 |
| H  | -1.681606 | -1.362868 | 1.305719  |
| H  | -1.401067 | -1.518819 | -1.127238 |
| Si | 2.152507  | -0.384648 | -0.015942 |
| H  | 1.841779  | -1.812915 | -0.289965 |
| H  | 2.969194  | -0.335184 | 1.220739  |
| H  | 3.007593  | 0.109758  | -1.123279 |

-----  
--

-----  
--  
B3PW91/Def2-TZVP

-----  
--  
F-Al≡N-F

-----  
--

| Atomic<br>Number | Coordinates (Angstroms) |           |           |
|------------------|-------------------------|-----------|-----------|
|                  | X                       | Y         | Z         |
| Al               | -0.566044               | -0.198655 | -0.003439 |
| N                | 1.014611                | 0.496985  | -0.001925 |
| F                | 2.213049                | -0.175594 | 0.002918  |
| F                | -2.184572               | 0.075996  | 0.003547  |

-----  
--

-----  
--

F2-Al=N

---

--

| Atomic<br>Number | Coordinates (Angstroms) |           |           |
|------------------|-------------------------|-----------|-----------|
|                  | X                       | Y         | Z         |
| Al               | 0.000463                | -0.024989 | -0.000013 |
| N                | -0.043032               | -1.864425 | 0.000007  |
| F                | 1.461914                | 0.713092  | 0.000007  |
| F                | -1.429113               | 0.773112  | 0.000006  |

---

--

---

--

Al=N-F2

---

--

| Atomic<br>Number | Coordinates (Angstroms) |           |           |
|------------------|-------------------------|-----------|-----------|
|                  | X                       | Y         | Z         |
| Al               | 1.622487                | -0.000049 | -0.000193 |
| N                | -0.246828               | -0.000029 | 0.001166  |
| F                | -1.075711               | 1.100182  | -0.000314 |
| F                | -1.075904               | -1.100088 | -0.000314 |

---

--

---

--

F-Al≡N-F-TS1

---

--

| Atomic<br>Number | Coordinates (Angstroms) |   |   |
|------------------|-------------------------|---|---|
|                  | X                       | Y | Z |



--

|    |           |           |           |
|----|-----------|-----------|-----------|
| N  | 1.181656  | 0.730918  | 0.005256  |
| Al | -0.491556 | 0.191766  | -0.006106 |
| F  | 1.856331  | -0.581851 | 0.000155  |
| F  | -2.065372 | -0.263636 | 0.004577  |

--

F-Al≡N-F-TS2

--

| Atomic<br>Number | Coordinates (Angstroms) |   |   |
|------------------|-------------------------|---|---|
|                  | X                       | Y | Z |

--

|    |           |           |           |
|----|-----------|-----------|-----------|
| Al | 1.529145  | 0.088360  | -0.063125 |
| N  | -0.341834 | 0.028522  | 0.459402  |
| F  | -1.122852 | 1.025197  | -0.143097 |
| F  | -0.820042 | -1.175012 | -0.123035 |

--

HO-Al≡N-OH

--

| Atomic<br>Number | Coordinates (Angstroms) |   |   |
|------------------|-------------------------|---|---|
|                  | X                       | Y | Z |

--

|    |           |           |           |
|----|-----------|-----------|-----------|
| Al | -0.586172 | -0.376601 | -0.001259 |
| N  | 0.978811  | 0.347968  | -0.096385 |
| O  | 2.259711  | 0.021923  | 0.158338  |

|   |           |           |           |
|---|-----------|-----------|-----------|
| H | 2.694060  | -0.069183 | -0.702220 |
| O | -2.190312 | 0.161529  | -0.002485 |
| H | -2.480700 | 1.061593  | 0.146449  |

-----  
 --  
 -----  
 --

(OH)<sub>2</sub>-Al≡N

-----  
 --

| Atomic<br>Number | Coordinates (Angstroms) |   |   |
|------------------|-------------------------|---|---|
|                  | X                       | Y | Z |

-----  
 --

|    |           |           |           |
|----|-----------|-----------|-----------|
| Al | 0.230115  | 0.217153  | -0.000724 |
| N  | -1.364171 | 0.919101  | -0.000370 |
| O  | 1.890202  | -0.012236 | 0.029053  |
| H  | 2.387894  | -0.816828 | -0.103765 |
| O  | -1.164006 | -0.897585 | -0.100945 |
| H  | -1.639750 | -1.161295 | 0.690903  |

-----  
 --  
 -----  
 --

Al≡N-(OH)<sub>2</sub>

-----  
 --

| Atomic<br>Number | Coordinates (Angstroms) |   |   |
|------------------|-------------------------|---|---|
|                  | X                       | Y | Z |

-----  
 --

|    |           |           |           |
|----|-----------|-----------|-----------|
| Al | 1.599565  | -0.000000 | 0.000000  |
| N  | -0.234529 | 0.000000  | -0.000001 |
| O  | -1.024821 | 1.145626  | -0.110929 |
| H  | -1.377754 | 1.310076  | 0.776041  |

|   |           |           |           |
|---|-----------|-----------|-----------|
| O | -1.024821 | -1.145626 | 0.110930  |
| H | -1.377755 | -1.310075 | -0.776040 |

HO-Al≡N-OH-TS1

| Atomic<br>Number | Coordinates (Angstroms) |           |           |
|------------------|-------------------------|-----------|-----------|
|                  | X                       | Y         | Z         |
| Al               | 0.088332                | 0.070922  | 0.017872  |
| N                | -0.984248               | 1.528927  | -0.011580 |
| O                | 1.745625                | -0.210888 | 0.022635  |
| H                | 2.442298                | 0.427790  | -0.115857 |
| O                | -1.101998               | -1.140149 | -0.089240 |
| H                | -1.849896               | -1.243958 | 0.497425  |

HO-Al≡N-OH-TS2

| Atomic<br>Number | Coordinates (Angstroms) |           |           |
|------------------|-------------------------|-----------|-----------|
|                  | X                       | Y         | Z         |
| Al               | -1.489103               | -0.336299 | -0.017910 |
| N                | 0.329981                | -0.135847 | 0.238715  |
| O                | 1.494100                | -0.738901 | -0.172805 |

|   |          |           |           |
|---|----------|-----------|-----------|
| H | 2.106614 | -0.675567 | 0.573470  |
| O | 0.305747 | 1.268875  | -0.158547 |
| H | 0.543083 | 1.758594  | 0.639170  |

--

H-Al≡N-H

--

| Atomic<br>Number | Coordinates (Angstroms) |   |   |
|------------------|-------------------------|---|---|
|                  | X                       | Y | Z |

--

|    |           |           |           |
|----|-----------|-----------|-----------|
| Al | -0.562067 | 0.035537  | -0.000010 |
| N  | 1.056506  | -0.069752 | -0.000007 |
| H  | 2.018208  | 0.201425  | 0.000085  |
| H  | -2.106876 | -0.175144 | 0.000091  |

--

H<sub>2</sub>-Al≡N

--

| Atomic<br>Number | Coordinates (Angstroms) |   |   |
|------------------|-------------------------|---|---|
|                  | X                       | Y | Z |

--

|    |           |           |           |
|----|-----------|-----------|-----------|
| Al | 0.000063  | -0.515576 | -0.000000 |
| N  | 0.000063  | 1.293706  | -0.000000 |
| H  | -1.440129 | -1.175260 | 0.000000  |
| H  | 1.438870  | -1.178198 | -0.000000 |

--

-----  
--  
Al≡N-H2  
-----

-----

| Atomic<br>Number | Coordinates (Angstroms) |           |           |
|------------------|-------------------------|-----------|-----------|
|                  | X                       | Y         | Z         |
| Al               | -0.789723               | -0.000002 | 0.000000  |
| N                | 1.009546                | -0.000007 | -0.000001 |
| H                | 1.599728                | 0.822464  | 0.000002  |
| H                | 1.599853                | -0.822383 | 0.000002  |

-----

-----  
--  
H-Al≡N-H-TS1  
-----

-----

| Atomic<br>Number | Coordinates (Angstroms) |           |           |
|------------------|-------------------------|-----------|-----------|
|                  | X                       | Y         | Z         |
| Al               | 0.014577                | -0.518592 | -0.000000 |
| N                | 0.014577                | 1.284228  | 0.000000  |
| H                | 1.252035                | -1.474404 | 0.000000  |
| H                | -1.543573               | -0.773492 | -0.000000 |

-----

-----  
--  
H-Al≡N-H-TS2  
-----  
--

| Atomic<br>Number | Coordinates (Angstroms) |           |           |
|------------------|-------------------------|-----------|-----------|
|                  | X                       | Y         | Z         |
| Al               | -0.000994               | -0.516280 | 0.000000  |
| N                | -0.000994               | 1.296310  | 0.000000  |
| H                | -1.427101               | -1.203751 | 0.000000  |
| H                | 1.446980                | -1.158770 | -0.000000 |

3HC-Al≡N-CH3

| Atomic<br>Number | Coordinates (Angstroms) |           |           |
|------------------|-------------------------|-----------|-----------|
|                  | X                       | Y         | Z         |
| H                | -2.878946               | 0.170978  | -1.008552 |
| C                | -2.496872               | 0.000826  | -0.000329 |
| H                | -2.878885               | 0.789562  | 0.650383  |
| H                | -2.881217               | -0.956426 | 0.356569  |
| Al               | -0.559043               | -0.001411 | 0.000533  |
| N                | 1.059426                | 0.001206  | -0.000368 |
| C                | 2.468980                | 0.000152  | -0.000097 |
| H                | 2.886305                | 0.751435  | 0.686191  |
| H                | 2.886206                | 0.218595  | -0.993963 |
| H                | 2.885466                | -0.970116 | 0.307575  |

(CH3)2-Al≡N

--

| Atomic<br>Number | Coordinates (Angstroms) |           |           |
|------------------|-------------------------|-----------|-----------|
|                  | X                       | Y         | Z         |
| N                | -0.000238               | 1.907366  | 0.001351  |
| Al               | 0.000030                | 0.097287  | -0.002278 |
| C                | -1.773257               | -0.751848 | 0.001093  |
| H                | -1.898515               | -1.343898 | -0.910061 |
| H                | -2.584871               | -0.026124 | 0.055934  |
| H                | -1.853637               | -1.428239 | 0.856986  |
| C                | 1.773385                | -0.751814 | 0.000895  |
| H                | 2.584531                | -0.025918 | -0.059319 |
| H                | 1.854221                | -1.432761 | -0.851366 |
| H                | 1.898780                | -1.337370 | 0.916062  |

--

Al≡N-(CH3)2

--

| Atomic<br>Number | Coordinates (Angstroms) |           |           |
|------------------|-------------------------|-----------|-----------|
|                  | X                       | Y         | Z         |
| H                | -0.360136               | 2.092856  | 0.000031  |
| C                | -1.003346               | 1.205284  | -0.000003 |
| H                | -1.651639               | 1.270865  | 0.885669  |
| H                | -1.651577               | 1.270880  | -0.885719 |
| N                | -0.207040               | -0.000014 | 0.000013  |
| Al               | 1.601363                | -0.000055 | -0.000002 |
| C                | -1.003507               | -1.205204 | -0.000002 |
| H                | -1.651781               | -1.270690 | -0.885697 |
| H                | -0.360413               | -2.092859 | -0.000013 |

H -1.651781 -1.270710 0.885688

-----  
--  
-----  
--  
3HC-Al≡N-CH3-TS1  
-----

-----  
--  
Atomic Coordinates (Angstroms)  
Number X Y Z  
-----

-----  
--  
N 0.051440 -1.898069 0.003000  
Al -0.002892 -0.090033 -0.006020  
C -1.796174 0.718264 0.001016  
H -1.963030 1.223533 0.956612  
H -2.582971 -0.023390 -0.138513  
H -1.867412 1.464589 -0.795003  
C 1.761808 0.770766 0.001991  
H 2.574246 0.055473 -0.126203  
H 1.909285 1.297311 0.949173  
H 1.813593 1.505215 -0.806848  
-----

-----  
--  
-----  
--  
3HC-Al≡N-CH3-TS2  
-----

-----  
--  
Atomic Coordinates (Angstroms)  
Number X Y Z  
-----

-----  
--  
Al -0.948345 -0.923012 -0.002520  
N 0.623245 -0.269086 0.011092  
-----



|   |           |           |           |
|---|-----------|-----------|-----------|
| C | -1.162135 | 1.224371  | 0.000828  |
| H | -1.624123 | 1.392509  | -0.970210 |
| H | -0.304296 | 1.869632  | 0.143188  |
| H | -1.880028 | 1.347435  | 0.810591  |
| C | 1.950988  | 0.180310  | -0.012492 |
| H | 2.138586  | 0.945232  | 0.756308  |
| H | 2.293276  | 0.554578  | -0.987084 |
| H | 2.609240  | -0.654716 | 0.272312  |

-----  
--

-----  
--  
3HSi-Al≡N-SiH3

-----  
--  
Atomic Coordinates (Angstroms)  
Number X Y Z

|    |           |           |           |
|----|-----------|-----------|-----------|
| Al | -0.500005 | 0.000349  | 0.000526  |
| N  | 1.141861  | 0.000619  | 0.001104  |
| Si | -2.931012 | -0.000220 | -0.000311 |
| Si | 2.828479  | -0.000218 | -0.000394 |
| H  | -3.413983 | -1.022727 | 0.960045  |
| H  | -3.412777 | -0.320901 | -1.366387 |
| H  | -3.413517 | 1.343070  | 0.404568  |
| H  | 3.392683  | -0.381674 | -1.330813 |
| H  | 3.394477  | -0.962129 | 0.993789  |
| H  | 3.395602  | 1.341625  | 0.334097  |

-----  
--

-----  
--  
(SiH3)2-Al≡N

-----  
--

--

| Atomic<br>Number | Coordinates (Angstroms) |   |   |
|------------------|-------------------------|---|---|
|                  | X                       | Y | Z |

--

|    |           |           |           |
|----|-----------|-----------|-----------|
| N  | -0.005303 | 2.118733  | 0.001674  |
| Al | 0.000437  | 0.356007  | -0.002874 |
| Si | 2.305408  | -0.536371 | 0.000870  |
| H  | 3.303674  | 0.559173  | -0.005573 |
| H  | 2.489656  | -1.384950 | -1.206699 |
| H  | 2.492832  | -1.375142 | 1.214588  |
| Si | -2.303370 | -0.538849 | 0.000523  |
| H  | -2.483664 | -1.401145 | 1.198914  |
| H  | -3.302045 | 0.556126  | 0.028911  |
| H  | -2.497535 | -1.360193 | -1.223993 |

--

Al≡N-(SiH3)2

--

| Atomic<br>Number | Coordinates (Angstroms) |   |   |
|------------------|-------------------------|---|---|
|                  | X                       | Y | Z |

--

|    |           |           |           |
|----|-----------|-----------|-----------|
| H  | -2.578476 | 0.353355  | 0.003814  |
| Si | -1.533446 | -0.713869 | 0.000036  |
| H  | -1.728869 | -1.566237 | 1.203746  |
| H  | -1.733502 | -1.562069 | -1.206118 |
| N  | -0.000046 | 0.087892  | -0.000803 |
| Al | 0.004884  | 1.925689  | 0.000036  |
| Si | 1.529842  | -0.720124 | 0.000130  |
| H  | 1.728911  | -1.566053 | -1.210615 |
| H  | 2.580138  | 0.345087  | 0.008898  |

H 1.719083 -1.577375 1.203099

-----

--

-----

--

3HSi-Al≡N-SiH3-TS1

-----

--

| Atomic<br>Number | Coordinates (Angstroms) |   |   |
|------------------|-------------------------|---|---|
|                  | X                       | Y | Z |

-----

--

|    |           |           |           |
|----|-----------|-----------|-----------|
| N  | 0.022274  | 2.098288  | 0.002709  |
| Al | -0.002925 | 0.333902  | -0.005272 |
| Si | -2.319117 | -0.521731 | 0.000969  |
| H  | -3.294833 | 0.593264  | 0.041611  |
| H  | -2.508184 | -1.391153 | 1.192808  |
| H  | -2.538593 | -1.331185 | -1.227241 |
| Si | 2.312545  | -0.531016 | 0.000678  |
| H  | 2.486276  | -1.469989 | -1.139607 |
| H  | 3.291170  | 0.575832  | -0.114251 |
| H  | 2.538286  | -1.267052 | 1.273187  |

-----

--

-----

--

3HSi-Al≡N-SiH3-TS2

-----

--

| Atomic<br>Number | Coordinates (Angstroms) |   |   |
|------------------|-------------------------|---|---|
|                  | X                       | Y | Z |

-----

--

|    |           |          |           |
|----|-----------|----------|-----------|
| Al | -0.721890 | 1.415787 | -0.006795 |
| N  | 0.621908  | 0.401282 | 0.027321  |

|    |           |           |           |
|----|-----------|-----------|-----------|
| Si | -1.890539 | -0.757050 | -0.000747 |
| H  | -3.359380 | -0.546911 | -0.134499 |
| H  | -1.629418 | -1.410101 | 1.301705  |
| H  | -1.429934 | -1.570451 | -1.147110 |
| Si | 2.146804  | -0.369524 | -0.002953 |
| H  | 1.941117  | -1.805153 | -0.356665 |
| H  | 2.858505  | -0.330725 | 1.307026  |
| H  | 3.062601  | 0.221168  | -1.021570 |

-----  
--

-----  
--

B3LYP/LANL2DZ+dp

-----  
--

-----  
--

F-Al≡N-F

-----  
--

| Atomic<br>Number | Coordinates (Angstroms) |           |           |
|------------------|-------------------------|-----------|-----------|
|                  | X                       | Y         | Z         |
| Al               | 0.556956                | -0.181546 | 0.000198  |
| N                | -1.041501               | 0.536748  | 0.000074  |
| F                | -2.225518               | -0.208050 | -0.000150 |
| F                | 2.231082                | 0.052813  | -0.000194 |

-----  
--

-----  
--

F2-Al=N

-----  
--

| Atomic<br>Number | Coordinates (Angstroms) |           |           |
|------------------|-------------------------|-----------|-----------|
|                  | X                       | Y         | Z         |
| Al               | -0.000037               | -0.034730 | -0.000005 |
| N                | 0.003172                | -1.889993 | 0.000003  |
| F                | 1.480985                | 0.762272  | 0.000003  |
| F                | -1.483398               | 0.757889  | 0.000003  |

Al=N-F2

| Atomic<br>Number | Coordinates (Angstroms) |           |           |
|------------------|-------------------------|-----------|-----------|
|                  | X                       | Y         | Z         |
| Al               | 1.655636                | 0.000054  | -0.000390 |
| N                | -0.253823               | 0.000020  | 0.002366  |
| F                | -1.097130               | 1.112937  | -0.000638 |
| F                | -1.096927               | -1.113030 | -0.000638 |

F-Al≡N-F-TS1

| Atomic<br>Number | Coordinates (Angstroms) |          |          |
|------------------|-------------------------|----------|----------|
|                  | X                       | Y        | Z        |
| N                | 1.203199                | 0.739689 | 0.000611 |

|    |           |           |           |
|----|-----------|-----------|-----------|
| Al | -0.487969 | 0.203503  | -0.000694 |
| F  | 1.874674  | -0.597726 | 0.000013  |
| F  | -2.105651 | -0.271537 | 0.000515  |

-----  
 --  
 -----  
 --  
 F-Al≡N-F-TS2  
 -----

-----  
 --  

| Atomic<br>Number | Coordinates (Angstroms) |   |   |
|------------------|-------------------------|---|---|
|                  | X                       | Y | Z |

 -----

|    |           |           |           |
|----|-----------|-----------|-----------|
| Al | 1.590161  | 0.077243  | -0.058371 |
| N  | -0.314866 | 0.035215  | 0.394259  |
| F  | -1.166777 | 1.036441  | -0.120088 |
| F  | -0.885228 | -1.175403 | -0.102244 |

-----  
 --  
 -----  
 --  
 HO-Al≡N-OH  
 -----

-----  
 --  

| Atomic<br>Number | Coordinates (Angstroms) |   |   |
|------------------|-------------------------|---|---|
|                  | X                       | Y | Z |

 -----

|    |           |           |           |
|----|-----------|-----------|-----------|
| Al | -0.583456 | -0.359891 | -0.008275 |
| N  | 1.000980  | 0.380729  | -0.133220 |
| O  | 2.278737  | -0.002993 | 0.182821  |
| H  | 2.740918  | -0.096497 | -0.668975 |
| O  | -2.231288 | 0.139377  | -0.000707 |
| H  | -2.542436 | 1.018896  | 0.252174  |

-----  
--  
-----  
--  
(OH)2-Al≡N  
-----

-----

| Atomic<br>Number | Coordinates (Angstroms) |           |           |
|------------------|-------------------------|-----------|-----------|
|                  | X                       | Y         | Z         |
| Al               | 0.230344                | 0.220093  | 0.001444  |
| N                | -1.373451               | 0.952510  | -0.001503 |
| O                | 1.916668                | -0.011992 | 0.024627  |
| H                | 2.388730                | -0.845949 | -0.083411 |
| O                | -1.178981               | -0.926029 | -0.101902 |
| H                | -1.670539               | -1.178648 | 0.693351  |

-----  
--  
-----  
--

-----  
--  
-----  
--  
Al≡N-(OH)2  
-----

-----

| Atomic<br>Number | Coordinates (Angstroms) |           |           |
|------------------|-------------------------|-----------|-----------|
|                  | X                       | Y         | Z         |
| Al               | 1.628092                | -0.000008 | -0.000000 |
| N                | -0.239112               | -0.000004 | 0.000001  |
| O                | -1.043852               | 1.159098  | -0.111675 |
| H                | -1.394751               | 1.321364  | 0.783686  |
| O                | -1.043882               | -1.159084 | 0.111674  |
| H                | -1.394783               | -1.321340 | -0.783687 |

-----

--

HO-Al≡N-OH-TS1

--

| Atomic<br>Number | Coordinates (Angstroms) |           |           |
|------------------|-------------------------|-----------|-----------|
|                  | X                       | Y         | Z         |
| Al               | 0.108059                | 0.093089  | 0.013276  |
| N                | -1.092853               | 1.459793  | -0.007975 |
| O                | 1.793379                | -0.180550 | 0.019843  |
| H                | 2.478473                | 0.490755  | -0.078130 |
| O                | -1.101199               | -1.145926 | -0.097125 |
| H                | -1.770708               | -1.307665 | 0.579622  |

--

HO-Al≡N-OH-TS2

--

| Atomic<br>Number | Coordinates (Angstroms) |           |           |
|------------------|-------------------------|-----------|-----------|
|                  | X                       | Y         | Z         |
| Al               | -1.535923               | -0.265081 | -0.023819 |
| N                | 0.318200                | -0.092204 | 0.294038  |
| O                | 1.373756                | -0.888436 | -0.183009 |
| H                | 2.050082                | -0.863881 | 0.515549  |
| O                | 0.482964                | 1.287632  | -0.174500 |
| H                | 0.835762                | 1.761801  | 0.595904  |

--



-----  
--  
H-Al≡N-H  
-----

-----

| Atomic<br>Number | Coordinates (Angstroms) |           |           |
|------------------|-------------------------|-----------|-----------|
|                  | X                       | Y         | Z         |
| Al               | -0.568540               | 0.051668  | 0.000240  |
| N                | 1.072760                | -0.105717 | 0.000133  |
| H                | 1.989127                | 0.322163  | -0.001897 |
| H                | -2.107425               | -0.253825 | -0.002159 |

-----

-----  
--  
H2-Al≡N  
-----

-----

| Atomic<br>Number | Coordinates (Angstroms) |           |           |
|------------------|-------------------------|-----------|-----------|
|                  | X                       | Y         | Z         |
| Al               | 0.000055                | -0.521169 | 0.000000  |
| N                | 0.000055                | 1.308377  | -0.000000 |
| H                | -1.448028               | -1.190458 | 0.000000  |
| H                | 1.446922                | -1.192977 | 0.000000  |

-----

-----  
--  
Al≡N-H2  
-----  
--

| Atomic<br>Number | Coordinates (Angstroms) |           |           |
|------------------|-------------------------|-----------|-----------|
|                  | X                       | Y         | Z         |
| Al               | -0.802628               | -0.000002 | 0.000000  |
| N                | 1.025723                | -0.000007 | -0.000000 |
| H                | 1.626992                | 0.826757  | 0.000000  |
| H                | 1.627106                | -0.826684 | 0.000000  |

H-Al≡N-H-TS1

| Atomic<br>Number | Coordinates (Angstroms) |           |           |
|------------------|-------------------------|-----------|-----------|
|                  | X                       | Y         | Z         |
| Al               | -0.000152               | -0.521589 | 0.000000  |
| N                | -0.000152               | 1.309958  | -0.000000 |
| H                | 1.447768                | -1.191049 | 0.000000  |
| H                | -1.444719               | -1.197998 | -0.000000 |

H-Al≡N-H-TS2

| Atomic<br>Number | Coordinates (Angstroms) |           |           |
|------------------|-------------------------|-----------|-----------|
|                  | X                       | Y         | Z         |
| Al               | 0.521691                | -0.000191 | -0.000001 |

|   |           |           |          |
|---|-----------|-----------|----------|
| N | -1.310430 | 0.002270  | 0.000000 |
| H | 1.182319  | -1.452411 | 0.000004 |
| H | 1.208710  | 1.438997  | 0.000004 |

-----  
 --  
 -----  
 --  
 3HC-Al≡N-CH3  
 -----

| Atomic<br>Number | Coordinates (Angstroms) |           |           |
|------------------|-------------------------|-----------|-----------|
|                  | X                       | Y         | Z         |
| H                | -2.901543               | 0.388595  | -0.953259 |
| C                | -2.515551               | 0.002147  | -0.000412 |
| H                | -2.901778               | 0.636005  | 0.809094  |
| H                | -2.907432               | -1.013876 | 0.142102  |
| Al               | -0.565386               | -0.004377 | 0.000775  |
| N                | 1.066721                | 0.006104  | -0.000890 |
| C                | 2.493166                | -0.000538 | 0.000012  |
| H                | 2.911168                | 0.582765  | 0.840852  |
| H                | 2.911482                | 0.433591  | -0.926559 |
| H                | 2.905387                | -1.022559 | 0.086318  |

-----  
 --  
 -----  
 --  
 (CH3)2-Al≡N  
 -----

| Atomic<br>Number | Coordinates (Angstroms) |   |   |
|------------------|-------------------------|---|---|
|                  | X                       | Y | Z |

|    |           |           |           |
|----|-----------|-----------|-----------|
| N  | 0.002584  | 1.942702  | 0.000970  |
| Al | -0.000106 | 0.114503  | -0.002113 |
| C  | -1.773433 | -0.771165 | 0.000702  |
| H  | -1.889827 | -1.365564 | -0.918877 |
| H  | -2.615963 | -0.072496 | 0.071531  |
| H  | -1.827528 | -1.466897 | 0.852803  |
| C  | 1.770669  | -0.774389 | 0.000231  |
| H  | 2.612169  | -0.075829 | -0.086589 |
| H  | 1.825879  | -1.487485 | -0.837131 |
| H  | 1.895145  | -1.345858 | 0.933338  |

--

--

Al≡N-(CH<sub>3</sub>)<sub>2</sub>

--

| Atomic<br>Number | Coordinates (Angstroms) |           |           |
|------------------|-------------------------|-----------|-----------|
|                  | X                       | Y         | Z         |
| H                | -0.382343               | 2.110175  | 0.000065  |
| C                | -1.020708               | 1.212054  | -0.000003 |
| H                | -1.673356               | 1.270219  | 0.890458  |
| H                | -1.673251               | 1.270270  | -0.890538 |
| N                | -0.207688               | -0.000012 | 0.000012  |
| Al               | 1.627801                | -0.000041 | -0.000002 |
| C                | -1.020829               | -1.211994 | -0.000001 |
| H                | -1.673460               | -1.270084 | -0.890482 |
| H                | -0.382552               | -2.110176 | -0.000053 |
| H                | -1.673409               | -1.270143 | 0.890511  |

--

--

3HC-Al≡N-CH3-TS1

---

--

| Atomic<br>Number | Coordinates (Angstroms) |           |           |
|------------------|-------------------------|-----------|-----------|
|                  | X                       | Y         | Z         |
| N                | -0.026324               | -1.931086 | 0.000033  |
| Al               | 0.002064                | -0.103273 | -0.000046 |
| C                | -1.772976               | 0.777168  | 0.000034  |
| H                | -1.869872               | 1.420528  | 0.888063  |
| H                | -2.603734               | 0.060539  | 0.002523  |
| H                | -1.871844               | 1.416548  | -0.890626 |
| C                | 1.789367                | 0.749897  | 0.000011  |
| H                | 2.608839                | 0.020310  | -0.001336 |
| H                | 1.898377                | 1.388842  | 0.889819  |
| H                | 1.897313                | 1.390997  | -0.888339 |

---

--

---

--

3HC-Al≡N-CH3-TS2

---

--

| Atomic<br>Number | Coordinates (Angstroms) |           |           |
|------------------|-------------------------|-----------|-----------|
|                  | X                       | Y         | Z         |
| Al               | -0.976239               | -0.932816 | -0.002215 |
| N                | 0.625468                | -0.284940 | 0.010464  |
| C                | -1.145846               | 1.260395  | 0.000486  |
| H                | -1.559534               | 1.451672  | -0.994780 |
| H                | -0.273599               | 1.884516  | 0.192153  |
| H                | -1.901134               | 1.394533  | 0.782766  |
| C                | 1.971989                | 0.165057  | -0.013013 |

---

|   |          |           |           |
|---|----------|-----------|-----------|
| H | 2.113210 | 1.028596  | 0.664838  |
| H | 2.349905 | 0.433205  | -1.015433 |
| H | 2.627131 | -0.624048 | 0.401172  |

-----  
 --  
 -----  
 --  
 3HSi-Al≡N-SiH3  
 -----  
 --

| Atomic<br>Number | Coordinates (Angstroms) |           |           |
|------------------|-------------------------|-----------|-----------|
|                  | X                       | Y         | Z         |
| Al               | -0.513124               | 0.000221  | -0.000013 |
| N                | 1.142141                | -0.000261 | -0.000161 |
| Si               | -2.936283               | -0.000062 | 0.000020  |
| Si               | 2.843933                | 0.000003  | 0.000044  |
| H                | -3.418014               | -1.399908 | -0.035735 |
| H                | -3.418464               | 0.730778  | -1.194228 |
| H                | -3.418285               | 0.668768  | 1.230101  |
| H                | 3.407825                | 0.664853  | -1.210866 |
| H                | 3.407923                | -1.381056 | 0.029800  |
| H                | 3.407553                | 0.716350  | 1.181321  |

-----  
 --  
 -----  
 --  
 (SiH3)2-Al≡N  
 -----  
 --

| Atomic<br>Number | Coordinates (Angstroms) |   |   |
|------------------|-------------------------|---|---|
|                  | X                       | Y | Z |

|    |           |           |           |
|----|-----------|-----------|-----------|
| N  | -0.002674 | 2.169782  | -0.001047 |
| Al | 0.000254  | 0.386906  | 0.001863  |
| Si | 2.282906  | -0.556927 | -0.000286 |
| H  | 3.309634  | 0.508472  | 0.003459  |
| H  | 2.443956  | -1.401090 | -1.211111 |
| H  | 2.443614  | -1.408782 | 1.205125  |
| Si | -2.282059 | -0.558084 | -0.000181 |
| H  | -2.424566 | -1.458202 | 1.172051  |
| H  | -3.310044 | 0.504266  | 0.061923  |
| H  | -2.459035 | -1.352769 | -1.241798 |

-----  
 --

-----  
 --

Al≡N-(SiH3)2

-----  
 --

| Atomic<br>Number | Coordinates (Angstroms) |           |           |
|------------------|-------------------------|-----------|-----------|
|                  | X                       | Y         | Z         |
| H                | -2.606038               | 0.294914  | -0.022795 |
| Si               | -1.528136               | -0.735855 | -0.000104 |
| H                | -1.709649               | -1.576868 | 1.214833  |
| H                | -1.689914               | -1.611361 | -1.193076 |
| N                | -0.000009               | 0.108577  | 0.000238  |
| Al               | 0.001689                | 1.974578  | -0.000037 |
| Si               | 1.526888                | -0.738051 | 0.000069  |
| H                | 1.708040                | -1.577608 | -1.216668 |
| H                | 2.606263                | 0.291844  | 0.024791  |
| H                | 1.686887                | -1.615790 | 1.192225  |

-----  
 --

-----  
 --

3HSi-Al≡N-SiH3-TS1

---

--

| Atomic<br>Number | Coordinates (Angstroms) |           |           |
|------------------|-------------------------|-----------|-----------|
|                  | X                       | Y         | Z         |
| N                | 0.002282                | 2.157439  | 0.000674  |
| Al               | -0.000207               | 0.375510  | -0.001209 |
| Si               | -2.289874               | -0.550938 | 0.000237  |
| H                | -3.305950               | 0.524557  | 0.007463  |
| H                | -2.456204               | -1.402367 | 1.205236  |
| H                | -2.462183               | -1.392025 | -1.211159 |
| Si               | 2.289124                | -0.551938 | 0.000169  |
| H                | 2.452431                | -1.416582 | -1.195776 |
| H                | 3.305645                | 0.522904  | -0.020734 |
| H                | 2.463475                | -1.379925 | 1.220291  |

---

--

3HSi-Al≡N-SiH3-TS2

---

| Atomic<br>Number | Coordinates (Angstroms) |           |           |
|------------------|-------------------------|-----------|-----------|
|                  | X                       | Y         | Z         |
| Al               | -0.758622               | 1.452011  | -0.014928 |
| N                | 0.605629                | 0.426623  | 0.057814  |
| Si               | -1.846176               | -0.799243 | -0.001421 |
| H                | -3.295876               | -0.624328 | -0.284095 |
| H                | -1.694213               | -1.357338 | 1.358972  |
| H                | -1.268305               | -1.676815 | -1.038726 |
| Si               | 2.136744                | -0.364878 | -0.007351 |
| H                | 1.916073                | -1.773105 | -0.442211 |
| H                | 2.838748                | -0.407816 | 1.304687  |
| H                | 3.058309                | 0.274592  | -0.986460 |

---



-----  
b97d3/LANL2DZ+dp  
-----

--

SiMe(SitBu<sub>3</sub>)<sub>2</sub>-Ga≡N-SiMe(SitBu<sub>3</sub>)<sub>2</sub>  
-----

--

| Atomic<br>Number | Coordinates (Angstroms) |   |   |
|------------------|-------------------------|---|---|
|                  | X                       | Y | Z |

-----

--

|    |           |           |           |
|----|-----------|-----------|-----------|
| Ga | -0.549007 | 0.059447  | -0.143399 |
| N  | 1.134145  | -0.090053 | 0.085475  |
| Si | 2.689742  | 0.402443  | -0.477005 |
| Si | 3.704511  | -1.576375 | -1.556796 |
| Si | 3.578673  | 1.772386  | 1.466005  |
| C  | 2.404815  | 1.593498  | -1.955663 |
| H  | 1.995360  | 1.012958  | -2.797432 |
| H  | 3.297059  | 2.124339  | -2.320234 |
| H  | 1.641745  | 2.338473  | -1.683604 |
| C  | 5.419790  | -1.221022 | -2.458771 |
| C  | 5.874490  | -2.369042 | -3.394844 |
| H  | 5.974550  | -3.327918 | -2.866337 |
| H  | 6.869431  | -2.118236 | -3.810170 |
| H  | 5.200072  | -2.520906 | -4.247661 |
| C  | 6.558792  | -1.017104 | -1.437616 |
| H  | 6.332658  | -0.222100 | -0.720389 |
| H  | 7.482734  | -0.723908 | -1.971405 |
| H  | 6.785090  | -1.934221 | -0.875688 |
| C  | 5.348793  | 0.074469  | -3.304559 |
| H  | 6.327249  | 0.245061  | -3.792561 |
| H  | 5.137179  | 0.956230  | -2.686516 |
| H  | 4.588197  | 0.033043  | -4.093619 |
| C  | 3.915811  | -2.913759 | -0.138942 |

|   |          |           |           |
|---|----------|-----------|-----------|
| C | 4.606602 | -2.245811 | 1.068072  |
| H | 4.108440 | -1.309297 | 1.345179  |
| H | 5.663696 | -2.020327 | 0.876798  |
| H | 4.564941 | -2.916232 | 1.946912  |
| C | 4.749318 | -4.163527 | -0.503000 |
| H | 4.785931 | -4.842985 | 0.370424  |
| H | 5.789380 | -3.905343 | -0.753118 |
| H | 4.330384 | -4.731905 | -1.343832 |
| C | 2.520630 | -3.368751 | 0.353724  |
| H | 1.997498 | -3.993694 | -0.384524 |
| H | 1.878599 | -2.508410 | 0.591026  |
| H | 2.634334 | -3.975017 | 1.272568  |
| C | 2.441041 | -2.264257 | -2.936040 |
| C | 2.709067 | -3.762595 | -3.229750 |
| H | 2.060224 | -4.086582 | -4.066136 |
| H | 2.466157 | -4.400748 | -2.368881 |
| H | 3.748044 | -3.966839 | -3.520505 |
| C | 0.962410 | -2.153895 | -2.505512 |
| H | 0.325822 | -2.680982 | -3.242332 |
| H | 0.637626 | -1.104742 | -2.470738 |
| H | 0.771330 | -2.588980 | -1.519608 |
| C | 2.538155 | -1.510913 | -4.284494 |
| H | 2.370593 | -0.429634 | -4.173826 |
| H | 1.755466 | -1.896865 | -4.965340 |
| H | 3.502061 | -1.655084 | -4.788775 |
| C | 2.516057 | 3.459152  | 1.413540  |
| C | 3.235698 | 0.859561  | 3.209426  |
| C | 5.475084 | 2.239003  | 1.213227  |
| C | 5.921787 | 3.451530  | 2.060610  |
| H | 5.726898 | 3.300388  | 3.134948  |
| H | 5.428880 | 4.382702  | 1.749752  |
| H | 7.011809 | 3.602738  | 1.941280  |
| C | 5.712157 | 2.577574  | -0.277801 |
| H | 6.786437 | 2.778751  | -0.447757 |
| H | 5.153391 | 3.459087  | -0.614156 |

|    |           |           |           |
|----|-----------|-----------|-----------|
| H  | 5.430813  | 1.739142  | -0.927213 |
| C  | 6.437028  | 1.076172  | 1.565570  |
| H  | 7.413437  | 1.247963  | 1.076512  |
| H  | 6.068029  | 0.098413  | 1.237189  |
| H  | 6.622955  | 1.014272  | 2.644418  |
| C  | 2.093967  | -0.167987 | 3.056376  |
| H  | 2.357536  | -1.001032 | 2.394460  |
| H  | 1.188703  | 0.282635  | 2.633577  |
| H  | 1.846959  | -0.590149 | 4.049164  |
| C  | 4.456207  | 0.111900  | 3.800848  |
| H  | 4.919289  | -0.602277 | 3.112084  |
| H  | 4.119030  | -0.459250 | 4.686476  |
| H  | 5.232154  | 0.811408  | 4.145828  |
| C  | 2.795030  | 1.834287  | 4.328325  |
| H  | 1.813361  | 2.286599  | 4.132074  |
| H  | 3.523843  | 2.639609  | 4.503191  |
| H  | 2.699611  | 1.263633  | 5.271487  |
| C  | 1.016231  | 3.102393  | 1.357658  |
| H  | 0.782901  | 2.500208  | 0.473819  |
| H  | 0.409545  | 4.027101  | 1.320574  |
| H  | 0.693218  | 2.524544  | 2.236274  |
| C  | 2.686687  | 4.449235  | 2.602716  |
| H  | 2.263780  | 5.425725  | 2.298901  |
| H  | 2.138424  | 4.134438  | 3.496767  |
| H  | 3.730850  | 4.623411  | 2.890178  |
| C  | 2.854058  | 4.291752  | 0.150236  |
| H  | 2.904973  | 3.701977  | -0.769584 |
| H  | 3.810322  | 4.822594  | 0.266141  |
| H  | 2.074351  | 5.064305  | 0.008840  |
| Si | -2.882451 | 0.327986  | 0.428066  |
| Si | -3.896445 | 1.649619  | -1.412641 |
| Si | -3.306555 | -1.867918 | 1.521110  |
| C  | -2.708602 | 1.677383  | 1.798025  |
| H  | -2.294285 | 2.600949  | 1.371115  |
| H  | -2.047523 | 1.371416  | 2.615639  |

|   |           |           |           |
|---|-----------|-----------|-----------|
| H | -3.689883 | 1.920584  | 2.235805  |
| C | -2.440646 | 2.692382  | -2.241959 |
| C | -2.993371 | 3.825530  | -3.145677 |
| H | -2.145631 | 4.321375  | -3.653835 |
| H | -3.520732 | 4.599150  | -2.571366 |
| H | -3.673749 | 3.458320  | -3.925135 |
| C | -1.534037 | 1.810340  | -3.131877 |
| H | -1.141994 | 0.924712  | -2.602892 |
| H | -0.656982 | 2.396681  | -3.458398 |
| H | -2.048205 | 1.456430  | -4.035694 |
| C | -1.521964 | 3.354081  | -1.193785 |
| H | -0.735607 | 3.938093  | -1.704620 |
| H | -0.999367 | 2.612551  | -0.573747 |
| H | -2.053313 | 4.033831  | -0.517388 |
| C | -4.696350 | 0.462810  | -2.740570 |
| C | -3.740716 | -0.718064 | -3.025838 |
| H | -2.828879 | -0.411728 | -3.552878 |
| H | -4.252540 | -1.467364 | -3.656856 |
| H | -3.436621 | -1.224429 | -2.103300 |
| C | -5.010913 | 1.136967  | -4.098873 |
| H | -4.103865 | 1.487529  | -4.610333 |
| H | -5.702704 | 1.985766  | -4.009196 |
| H | -5.488462 | 0.392317  | -4.762552 |
| C | -6.015993 | -0.136051 | -2.201833 |
| H | -6.807354 | 0.619332  | -2.096774 |
| H | -5.883395 | -0.619725 | -1.226704 |
| H | -6.386987 | -0.904177 | -2.905573 |
| C | -5.238879 | 2.884891  | -0.651589 |
| C | -6.178854 | 3.431796  | -1.756141 |
| H | -6.883162 | 4.152096  | -1.299447 |
| H | -6.783210 | 2.641659  | -2.221605 |
| H | -5.638401 | 3.961927  | -2.551790 |
| C | -6.132118 | 2.192823  | 0.401353  |
| H | -6.855731 | 2.926058  | 0.803546  |
| H | -5.549971 | 1.813047  | 1.252061  |

|   |           |           |           |
|---|-----------|-----------|-----------|
| H | -6.713156 | 1.360382  | -0.014585 |
| C | -4.612260 | 4.115693  | 0.049721  |
| H | -4.051582 | 4.760230  | -0.639594 |
| H | -3.948956 | 3.839421  | 0.878351  |
| H | -5.426735 | 4.731275  | 0.474421  |
| C | -1.900483 | -2.157197 | 2.882167  |
| C | -5.067507 | -1.760404 | 2.377436  |
| C | -3.237341 | -3.326964 | 0.214295  |
| C | -3.120097 | -4.719198 | 0.889011  |
| H | -3.946040 | -4.920848 | 1.585355  |
| H | -2.175904 | -4.853240 | 1.432289  |
| H | -3.155459 | -5.496032 | 0.102808  |
| C | -2.019836 | -3.176319 | -0.728523 |
| H | -2.017375 | -3.998519 | -1.467478 |
| H | -1.064495 | -3.219158 | -0.193285 |
| H | -2.036876 | -2.238953 | -1.301832 |
| C | -4.514637 | -3.376234 | -0.655720 |
| H | -5.386348 | -3.719862 | -0.080549 |
| H | -4.365026 | -4.094932 | -1.482002 |
| H | -4.766404 | -2.409895 | -1.104888 |
| C | -6.115619 | -1.226720 | 1.379258  |
| H | -5.773769 | -0.314369 | 0.881070  |
| H | -7.049830 | -0.978928 | 1.916087  |
| H | -6.368236 | -1.961672 | 0.604970  |
| C | -5.605699 | -3.114061 | 2.901567  |
| H | -5.744927 | -3.841787 | 2.089183  |
| H | -6.598660 | -2.946859 | 3.359482  |
| H | -4.965947 | -3.572712 | 3.665704  |
| C | -5.028211 | -0.764002 | 3.561332  |
| H | -4.691384 | 0.235886  | 3.251121  |
| H | -4.376482 | -1.101558 | 4.378360  |
| H | -6.046779 | -0.653583 | 3.976898  |
| C | -2.377467 | -3.198312 | 3.928347  |
| H | -1.532735 | -3.429148 | 4.602943  |
| H | -2.707639 | -4.144391 | 3.479880  |

|   |           |           |          |
|---|-----------|-----------|----------|
| H | -3.193305 | -2.812405 | 4.554902 |
| C | -0.572679 | -2.683959 | 2.289063 |
| H | -0.667067 | -3.672999 | 1.824749 |
| H | 0.166882  | -2.779020 | 3.103678 |
| H | -0.127108 | -1.998357 | 1.554602 |
| C | -1.526110 | -0.877252 | 3.664727 |
| H | -0.940657 | -0.187232 | 3.043831 |
| H | -2.394285 | -0.339049 | 4.065748 |
| H | -0.878862 | -1.153542 | 4.515959 |

-----  
--  
-----  
--  
[SiMe(SitBu<sub>3</sub>)<sub>2</sub>]<sub>2</sub>-Ga=N  
-----  
--

| Atomic<br>Number | Coordinates (Angstroms) |           |           |
|------------------|-------------------------|-----------|-----------|
|                  | X                       | Y         | Z         |
| N                | 1.149946                | 0.145031  | 0.352384  |
| Ga               | -0.512164               | 0.152618  | -0.052247 |
| Si               | 2.677562                | -0.281635 | -0.345253 |
| Si               | 3.726146                | -1.819881 | 1.321378  |
| Si               | 3.445978                | 1.886180  | -1.383066 |
| C                | 2.422750                | -1.507364 | -1.808118 |
| H                | 2.472057                | -2.544353 | -1.456242 |
| H                | 3.148967                | -1.403302 | -2.626356 |
| H                | 1.421700                | -1.360509 | -2.230369 |
| C                | 5.311296                | -2.780914 | 0.609070  |
| C                | 5.663513                | -4.059944 | 1.408979  |
| H                | 5.863340                | -3.850260 | 2.469691  |
| H                | 6.584989                | -4.501070 | 0.982778  |
| H                | 4.884905                | -4.832012 | 1.353625  |
| C                | 6.587691                | -1.910847 | 0.617994  |

|   |          |           |           |
|---|----------|-----------|-----------|
| H | 6.481243 | -1.022325 | -0.011339 |
| H | 7.427369 | -2.500177 | 0.202687  |
| H | 6.884040 | -1.590005 | 1.625829  |
| C | 5.103120 | -3.195766 | -0.867998 |
| H | 5.988943 | -3.759984 | -1.216955 |
| H | 4.997280 | -2.317070 | -1.519655 |
| H | 4.224593 | -3.836472 | -1.020336 |
| C | 4.200529 | -0.797695 | 2.918001  |
| C | 4.919708 | 0.488860  | 2.469426  |
| H | 4.272263 | 1.070845  | 1.802885  |
| H | 5.864441 | 0.298681  | 1.942887  |
| H | 5.148668 | 1.122484  | 3.347358  |
| C | 5.120290 | -1.531808 | 3.922347  |
| H | 5.307807 | -0.874135 | 4.792898  |
| H | 6.100735 | -1.776277 | 3.487103  |
| H | 4.680692 | -2.463736 | 4.302822  |
| C | 2.925292 | -0.334247 | 3.662873  |
| H | 2.417972 | -1.162471 | 4.177581  |
| H | 2.204533 | 0.140366  | 2.978713  |
| H | 3.204217 | 0.407271  | 4.435923  |
| C | 2.370712 | -3.195424 | 1.825578  |
| C | 2.768898 | -3.928126 | 3.134572  |
| H | 2.040233 | -4.740260 | 3.322193  |
| H | 2.730005 | -3.258225 | 4.004746  |
| H | 3.765772 | -4.383878 | 3.101989  |
| C | 0.961609 | -2.612202 | 2.079794  |
| H | 0.285380 | -3.433252 | 2.387868  |
| H | 0.557349 | -2.148959 | 1.175235  |
| H | 0.941790 | -1.848856 | 2.866197  |
| C | 2.181003 | -4.274672 | 0.731197  |
| H | 1.815248 | -3.847140 | -0.211754 |
| H | 1.418976 | -5.001946 | 1.071690  |
| H | 3.095372 | -4.842527 | 0.516371  |
| C | 2.130069 | 2.268272  | -2.833321 |
| C | 3.409679 | 3.416716  | -0.121122 |

|   |          |           |           |
|---|----------|-----------|-----------|
| C | 5.244359 | 1.732988  | -2.146646 |
| C | 5.810503 | 3.024387  | -2.785944 |
| H | 5.778548 | 3.879745  | -2.095238 |
| H | 5.284979 | 3.312977  | -3.705515 |
| H | 6.871973 | 2.858367  | -3.052808 |
| C | 5.284249 | 0.619224  | -3.218791 |
| H | 6.318364 | 0.506867  | -3.595864 |
| H | 4.643067 | 0.846430  | -4.082972 |
| H | 4.979235 | -0.356975 | -2.812850 |
| C | 6.223398 | 1.321415  | -1.021798 |
| H | 7.126477 | 0.854197  | -1.455154 |
| H | 5.765703 | 0.603411  | -0.332941 |
| H | 6.552604 | 2.179969  | -0.424322 |
| C | 2.254756 | 3.225236  | 0.885375  |
| H | 2.369876 | 2.315796  | 1.490488  |
| H | 1.282998 | 3.146288  | 0.386387  |
| H | 2.214387 | 4.093456  | 1.571267  |
| C | 4.712628 | 3.592630  | 0.697292  |
| H | 5.043374 | 2.681633  | 1.203275  |
| H | 4.537247 | 4.358364  | 1.476253  |
| H | 5.541045 | 3.955673  | 0.072381  |
| C | 3.205955 | 4.788454  | -0.816601 |
| H | 2.254737 | 4.872350  | -1.354680 |
| H | 4.016447 | 5.022423  | -1.523088 |
| H | 3.210911 | 5.578750  | -0.041909 |
| C | 0.785773 | 2.774322  | -2.262985 |
| H | 0.389377 | 2.067713  | -1.518410 |
| H | 0.043622 | 2.854895  | -3.079724 |
| H | 0.847458 | 3.756938  | -1.781425 |
| C | 2.650861 | 3.325648  | -3.839769 |
| H | 1.816211 | 3.633169  | -4.499057 |
| H | 3.050930 | 4.231352  | -3.368444 |
| H | 3.431592 | 2.906185  | -4.490761 |
| C | 1.762305 | 1.025692  | -3.677173 |
| H | 1.139105 | 0.326444  | -3.110407 |



|    |           |           |           |
|----|-----------|-----------|-----------|
| H  | 2.632140  | 0.470890  | -4.051794 |
| H  | 1.170387  | 1.350682  | -4.554027 |
| Si | -2.894571 | 0.323166  | -0.454596 |
| Si | -3.551156 | -1.910542 | -1.341545 |
| Si | -3.566713 | 1.808673  | 1.436308  |
| C  | -2.930591 | 1.369135  | -2.072359 |
| H  | -2.335519 | 0.883660  | -2.857678 |
| H  | -2.541060 | 2.382393  | -1.939433 |
| H  | -3.961437 | 1.452384  | -2.446588 |
| C  | -1.966938 | -2.670195 | -2.235943 |
| C  | -2.341656 | -3.881615 | -3.128136 |
| H  | -1.413607 | -4.318104 | -3.541158 |
| H  | -2.974243 | -3.602491 | -3.980423 |
| H  | -2.855030 | -4.674138 | -2.567371 |
| C  | -0.919373 | -3.183022 | -1.227405 |
| H  | -0.570803 | -2.401540 | -0.536082 |
| H  | -0.025843 | -3.529722 | -1.774014 |
| H  | -1.279657 | -4.024961 | -0.622706 |
| C  | -1.248681 | -1.638003 | -3.135144 |
| H  | -0.383711 | -2.117398 | -3.625821 |
| H  | -0.848493 | -0.790852 | -2.555814 |
| H  | -1.890493 | -1.224900 | -3.921890 |
| C  | -4.104545 | -3.045596 | 0.141610  |
| C  | -3.137614 | -2.843352 | 1.328659  |
| H  | -2.114050 | -3.174942 | 1.114995  |
| H  | -3.495551 | -3.414014 | 2.205062  |
| H  | -3.091612 | -1.791039 | 1.628148  |
| C  | -4.134681 | -4.559132 | -0.178628 |
| H  | -3.136902 | -4.954420 | -0.414563 |
| H  | -4.806912 | -4.811355 | -1.010173 |
| H  | -4.495525 | -5.104507 | 0.713208  |
| C  | -5.516165 | -2.635104 | 0.619523  |
| H  | -6.296963 | -2.911754 | -0.102353 |
| H  | -5.593524 | -1.554978 | 0.797778  |
| H  | -5.750626 | -3.146710 | 1.571065  |

|   |           |           |           |
|---|-----------|-----------|-----------|
| C | -4.993509 | -1.703953 | -2.676991 |
| C | -5.696740 | -3.061782 | -2.940531 |
| H | -6.457791 | -2.918974 | -3.730261 |
| H | -6.221660 | -3.440715 | -2.053055 |
| H | -5.008279 | -3.842900 | -3.288599 |
| C | -6.090369 | -0.714524 | -2.226648 |
| H | -6.873074 | -0.667536 | -3.006392 |
| H | -5.702877 | 0.305475  | -2.099627 |
| H | -6.580830 | -1.015322 | -1.292478 |
| C | -4.484198 | -1.188652 | -4.046156 |
| H | -3.808798 | -1.897571 | -4.541631 |
| H | -3.971955 | -0.220376 | -3.975069 |
| H | -5.353229 | -1.050571 | -4.715544 |
| C | -2.338126 | 3.360557  | 1.452995  |
| C | -5.400481 | 2.383901  | 1.053498  |
| C | -3.441775 | 0.893737  | 3.165731  |
| C | -3.550084 | 1.882036  | 4.355884  |
| H | -4.488970 | 2.453304  | 4.341337  |
| H | -2.719357 | 2.597351  | 4.394263  |
| H | -3.530145 | 1.305580  | 5.299174  |
| C | -2.103093 | 0.127965  | 3.318346  |
| H | -2.125577 | -0.464862 | 4.250905  |
| H | -1.236308 | 0.795479  | 3.376573  |
| H | -1.915870 | -0.579881 | 2.499220  |
| C | -4.597748 | -0.118060 | 3.339777  |
| H | -5.563325 | 0.389841  | 3.475333  |
| H | -4.420385 | -0.727084 | 4.244939  |
| H | -4.694633 | -0.806755 | 2.494699  |
| C | -6.283626 | 1.158984  | 0.733299  |
| H | -5.800026 | 0.489157  | 0.014665  |
| H | -7.237437 | 1.491494  | 0.283277  |
| H | -6.528557 | 0.571808  | 1.627596  |
| C | -6.095388 | 3.150084  | 2.205034  |
| H | -6.219315 | 2.524139  | 3.100358  |
| H | -7.109532 | 3.442577  | 1.872992  |

|   |           |          |           |
|---|-----------|----------|-----------|
| H | -5.569798 | 4.067347 | 2.498870  |
| C | -5.415608 | 3.290262 | -0.201979 |
| H | -4.977182 | 2.792857 | -1.077656 |
| H | -4.879201 | 4.236227 | -0.046971 |
| H | -6.461388 | 3.543465 | -0.456175 |
| C | -2.995982 | 4.566318 | 2.172857  |
| H | -2.243424 | 5.370178 | 2.273497  |
| H | -3.354085 | 4.323855 | 3.182532  |
| H | -3.836876 | 4.984165 | 1.601669  |
| C | -1.013034 | 3.059959 | 2.189928  |
| H | -1.151530 | 2.856246 | 3.258348  |
| H | -0.355990 | 3.942756 | 2.112181  |
| H | -0.454980 | 2.218521 | 1.751399  |
| C | -1.929991 | 3.845932 | 0.044894  |
| H | -1.292101 | 3.113480 | -0.466024 |
| H | -2.786199 | 4.074537 | -0.603298 |
| H | -1.331074 | 4.769566 | 0.141803  |

-----  
--  
-----  
--  
Ga=N-[SiMe(SitBu<sub>3</sub>)<sub>2</sub>]<sub>2</sub>  
-----  
--

| Atomic<br>Number | Coordinates (Angstroms) |           |           |
|------------------|-------------------------|-----------|-----------|
|                  | X                       | Y         | Z         |
| Ga               | 0.087132                | -0.993037 | -1.408038 |
| N                | 0.032717                | 0.045352  | 0.302514  |
| Si               | 1.784757                | 0.451572  | 0.536932  |
| Si               | 2.909082                | 1.832025  | -1.712482 |
| Si               | 3.215462                | -1.649005 | 1.747981  |
| C                | 2.079883                | 1.818066  | 1.811141  |
| H                | 1.716965                | 2.789421  | 1.459965  |

|   |           |           |           |
|---|-----------|-----------|-----------|
| H | 3.161590  | 1.904739  | 1.974975  |
| H | 1.621505  | 1.607751  | 2.780934  |
| C | 4.335829  | 3.103316  | -1.108193 |
| C | 4.710986  | 4.099578  | -2.239761 |
| H | 4.985065  | 3.617762  | -3.185281 |
| H | 5.586494  | 4.687442  | -1.905192 |
| H | 3.904740  | 4.817595  | -2.440617 |
| C | 5.624518  | 2.369490  | -0.682622 |
| H | 5.453654  | 1.776662  | 0.222026  |
| H | 6.405697  | 3.113868  | -0.438692 |
| H | 6.035831  | 1.706391  | -1.455492 |
| C | 3.949732  | 3.976709  | 0.112367  |
| H | 4.728387  | 4.750341  | 0.249510  |
| H | 3.917288  | 3.390764  | 1.036113  |
| H | 2.989240  | 4.493612  | 0.003180  |
| C | 3.668912  | 0.563626  | -3.036529 |
| C | 4.370038  | -0.585886 | -2.290005 |
| H | 3.679511  | -1.076629 | -1.592358 |
| H | 5.245157  | -0.249327 | -1.719181 |
| H | 4.719112  | -1.348083 | -3.011762 |
| C | 4.704868  | 1.205452  | -3.992820 |
| H | 5.069988  | 0.430726  | -4.693525 |
| H | 5.582291  | 1.597845  | -3.461352 |
| H | 4.277956  | 2.017257  | -4.599038 |
| C | 2.593804  | -0.102281 | -3.928272 |
| H | 2.063005  | 0.607029  | -4.576785 |
| H | 1.842812  | -0.650017 | -3.335376 |
| H | 3.086138  | -0.841379 | -4.587737 |
| C | 1.503520  | 2.901856  | -2.599503 |
| C | 1.893706  | 3.372270  | -4.024036 |
| H | 1.064234  | 3.980130  | -4.433383 |
| H | 2.054577  | 2.537161  | -4.717989 |
| H | 2.794264  | 3.999271  | -4.035824 |
| C | 0.210290  | 2.074137  | -2.726376 |
| H | -0.569570 | 2.669471  | -3.234261 |

|   |           |           |           |
|---|-----------|-----------|-----------|
| H | -0.179671 | 1.789538  | -1.740351 |
| H | 0.357682  | 1.162629  | -3.320831 |
| C | 1.154770  | 4.167939  | -1.786534 |
| H | 0.955510  | 3.940545  | -0.734479 |
| H | 0.243850  | 4.635515  | -2.204006 |
| H | 1.953773  | 4.920568  | -1.825471 |
| C | 2.069822  | -2.027530 | 3.308145  |
| C | 3.439125  | -3.328303 | 0.699244  |
| C | 5.008796  | -1.064038 | 2.332233  |
| C | 5.800383  | -2.178084 | 3.065224  |
| H | 5.904282  | -3.091314 | 2.463501  |
| H | 5.357195  | -2.453216 | 4.030923  |
| H | 6.822727  | -1.804630 | 3.267311  |
| C | 4.944478  | 0.145249  | 3.293484  |
| H | 5.969110  | 0.398435  | 3.624231  |
| H | 4.347460  | -0.055078 | 4.195035  |
| H | 4.534688  | 1.037853  | 2.803439  |
| C | 5.855795  | -0.635125 | 1.110659  |
| H | 6.681523  | 0.023898  | 1.435544  |
| H | 5.258861  | -0.088605 | 0.373658  |
| H | 6.309080  | -1.491691 | 0.596310  |
| C | 2.252457  | -3.498645 | -0.269138 |
| H | 2.244717  | -2.703977 | -1.032826 |
| H | 1.284803  | -3.484687 | 0.243699  |
| H | 2.328429  | -4.463504 | -0.804674 |
| C | 4.724260  | -3.382021 | -0.163259 |
| H | 4.843457  | -2.518689 | -0.823318 |
| H | 4.676098  | -4.282275 | -0.804311 |
| H | 5.631756  | -3.474986 | 0.449193  |
| C | 3.514848  | -4.590596 | 1.599307  |
| H | 2.602283  | -4.778914 | 2.176354  |
| H | 4.356808  | -4.546464 | 2.304674  |
| H | 3.676966  | -5.473567 | 0.952753  |
| C | 0.834489  | -2.820872 | 2.833630  |
| H | 0.344141  | -2.304034 | 2.000715  |

|    |           |           |           |
|----|-----------|-----------|-----------|
| H  | 0.101710  | -2.896540 | 3.657311  |
| H  | 1.070435  | -3.840624 | 2.510325  |
| C  | 2.771405  | -2.812904 | 4.442419  |
| H  | 2.013002  | -3.108779 | 5.192269  |
| H  | 3.273313  | -3.727086 | 4.101197  |
| H  | 3.511973  | -2.189504 | 4.964979  |
| C  | 1.514687  | -0.734772 | 3.945173  |
| H  | 0.840635  | -0.214483 | 3.256165  |
| H  | 2.299202  | -0.031829 | 4.255961  |
| H  | 0.925311  | -0.997444 | 4.843248  |
| Si | -1.688955 | -0.010475 | 0.778957  |
| Si | -3.049244 | 2.149766  | 1.429189  |
| Si | -3.012713 | -2.137480 | -1.281879 |
| C  | -1.970599 | -1.036718 | 2.356247  |
| H  | -1.346983 | -0.652080 | 3.178068  |
| H  | -1.750508 | -2.102924 | 2.235174  |
| H  | -3.022504 | -0.938863 | 2.661035  |
| C  | -1.667158 | 3.271639  | 2.234282  |
| C  | -2.160176 | 4.542624  | 2.963686  |
| H  | -1.278942 | 5.127657  | 3.288567  |
| H  | -2.739288 | 4.307619  | 3.867425  |
| H  | -2.770072 | 5.197453  | 2.326996  |
| C  | -0.715392 | 3.715612  | 1.109794  |
| H  | -0.354109 | 2.856862  | 0.528799  |
| H  | 0.161302  | 4.230445  | 1.542329  |
| H  | -1.188854 | 4.421571  | 0.416133  |
| C  | -0.842613 | 2.453125  | 3.250519  |
| H  | 0.025820  | 3.048244  | 3.583192  |
| H  | -0.457228 | 1.528741  | 2.804572  |
| H  | -1.413969 | 2.180900  | 4.144515  |
| C  | -3.808043 | 3.015083  | -0.163933 |
| C  | -2.865096 | 2.789773  | -1.366373 |
| H  | -1.897751 | 3.286806  | -1.237865 |
| H  | -3.326896 | 3.198926  | -2.284509 |
| H  | -2.669696 | 1.721056  | -1.541833 |

|   |           |           |           |
|---|-----------|-----------|-----------|
| C | -4.010397 | 4.542117  | -0.000502 |
| H | -3.068962 | 5.082435  | 0.166690  |
| H | -4.698399 | 4.792186  | 0.819351  |
| H | -4.451683 | 4.942441  | -0.932582 |
| C | -5.179277 | 2.425699  | -0.560677 |
| H | -5.949286 | 2.572297  | 0.208963  |
| H | -5.116883 | 1.356727  | -0.779077 |
| H | -5.535372 | 2.928620  | -1.479441 |
| C | -4.449449 | 1.863785  | 2.815032  |
| C | -5.302284 | 3.153639  | 2.952067  |
| H | -6.006790 | 3.022360  | 3.795010  |
| H | -5.906691 | 3.348399  | 2.055890  |
| H | -4.706676 | 4.050589  | 3.160365  |
| C | -5.446640 | 0.723555  | 2.529850  |
| H | -6.185713 | 0.686085  | 3.352044  |
| H | -4.963279 | -0.261202 | 2.486087  |
| H | -6.004793 | 0.872300  | 1.599238  |
| C | -3.849651 | 1.564345  | 4.210797  |
| H | -3.314976 | 2.424526  | 4.633787  |
| H | -3.168344 | 0.702282  | 4.204555  |
| H | -4.675474 | 1.327022  | 4.906859  |
| C | -2.074500 | -3.919173 | -1.232365 |
| C | -4.793958 | -2.404484 | -0.415951 |
| C | -3.331697 | -1.534771 | -3.167536 |
| C | -3.779251 | -2.711535 | -4.073419 |
| H | -4.687405 | -3.210308 | -3.709190 |
| H | -2.996491 | -3.473774 | -4.187683 |
| H | -4.000759 | -2.319683 | -5.084465 |
| C | -2.078597 | -0.910405 | -3.817718 |
| H | -2.315450 | -0.607944 | -4.855421 |
| H | -1.226052 | -1.602694 | -3.861045 |
| H | -1.763967 | -0.000624 | -3.282218 |
| C | -4.427080 | -0.444354 | -3.247079 |
| H | -5.426937 | -0.834754 | -3.017114 |
| H | -4.465006 | -0.045424 | -4.277800 |

|   |           |           |           |
|---|-----------|-----------|-----------|
| H | -4.221629 | 0.400406  | -2.575842 |
| C | -5.441701 | -1.034124 | -0.166275 |
| H | -4.730895 | -0.337136 | 0.289517  |
| H | -6.300251 | -1.142466 | 0.518900  |
| H | -5.821914 | -0.580590 | -1.087644 |
| C | -5.815200 | -3.214286 | -1.256943 |
| H | -6.052316 | -2.717985 | -2.208189 |
| H | -6.761011 | -3.278705 | -0.685293 |
| H | -5.496984 | -4.240060 | -1.476979 |
| C | -4.670810 | -3.092454 | 0.966027  |
| H | -3.988701 | -2.556486 | 1.637910  |
| H | -4.330550 | -4.134466 | 0.900188  |
| H | -5.666297 | -3.106601 | 1.447770  |
| C | -3.047606 | -5.103630 | -1.463292 |
| H | -2.470073 | -6.046859 | -1.439685 |
| H | -3.547189 | -5.049422 | -2.441010 |
| H | -3.818516 | -5.180952 | -0.687871 |
| C | -0.951813 | -4.096156 | -2.280206 |
| H | -1.319303 | -4.022661 | -3.313119 |
| H | -0.500842 | -5.097952 | -2.155787 |
| H | -0.141359 | -3.362275 | -2.165418 |
| C | -1.434453 | -4.088505 | 0.164382  |
| H | -0.741230 | -3.265893 | 0.386579  |
| H | -2.179563 | -4.114723 | 0.970706  |
| H | -0.858648 | -5.031435 | 0.209929  |

-----  
--  
-----  
--  
*Si*PrDis<sub>2</sub>-Ga≡N-*Si*PrDis<sub>2</sub>  
-----  
--

| Atomic<br>Number | Coordinates (Angstroms) |   |   |
|------------------|-------------------------|---|---|
|                  | X                       | Y | Z |



--

|    |           |           |           |
|----|-----------|-----------|-----------|
| Ga | -0.337462 | 0.267543  | -0.136413 |
| N  | 1.300018  | -0.162359 | -0.267856 |
| Si | 2.812940  | -0.368822 | 0.512682  |
| Si | -2.632739 | -0.330338 | -0.638024 |
| C  | 3.584068  | 1.370281  | 0.769627  |
| H  | 4.680361  | 1.236184  | 0.773808  |
| C  | 3.940664  | -1.575122 | -0.503975 |
| H  | 4.038476  | -2.411563 | 0.221893  |
| C  | 2.478598  | -1.485002 | 2.063558  |
| H  | 2.055067  | -2.360771 | 1.531900  |
| C  | 1.378360  | -1.021916 | 3.030791  |
| H  | 1.072386  | -1.847284 | 3.699510  |
| H  | 0.478817  | -0.690621 | 2.484085  |
| H  | 1.697371  | -0.188052 | 3.670973  |
| C  | 3.711458  | -2.000050 | 2.836517  |
| H  | 3.405074  | -2.686740 | 3.646989  |
| H  | 4.290572  | -1.187497 | 3.295620  |
| H  | 4.401658  | -2.558545 | 2.185258  |
| C  | -2.327985 | -1.443110 | -2.176222 |
| H  | -1.764637 | -2.310286 | -1.798563 |
| C  | -1.470709 | -0.790235 | -3.275618 |
| H  | -1.294872 | -1.507874 | -4.095672 |
| H  | -0.483858 | -0.474211 | -2.905662 |
| H  | -1.967921 | 0.089985  | -3.712034 |
| C  | -3.653338 | -1.946701 | -2.786215 |
| H  | -3.451269 | -2.664390 | -3.600828 |
| H  | -4.231079 | -1.114901 | -3.223473 |
| H  | -4.298820 | -2.448967 | -2.053410 |
| C  | -2.976496 | -1.434114 | 0.919343  |
| H  | -1.915015 | -1.681416 | 1.154515  |
| C  | -3.665885 | 1.159407  | -1.256518 |
| H  | -3.734508 | 0.872597  | -2.328877 |
| Si | 3.002385  | -2.522627 | -1.864358 |
| Si | 5.783727  | -1.199394 | -0.742203 |

|    |          |           |           |
|----|----------|-----------|-----------|
| Si | 3.270890 | 2.261329  | 2.415250  |
| Si | 3.296298 | 2.555670  | -0.703129 |
| C  | 4.014131 | -3.969863 | -2.554300 |
| H  | 3.337975 | -4.622782 | -3.135169 |
| H  | 4.470055 | -4.585551 | -1.762257 |
| H  | 4.817707 | -3.644605 | -3.233489 |
| C  | 1.465091 | -3.346862 | -1.125598 |
| H  | 0.916208 | -3.891955 | -1.913773 |
| H  | 0.794915 | -2.597540 | -0.681820 |
| H  | 1.736474 | -4.079274 | -0.345301 |
| C  | 2.478018 | -1.518931 | -3.368370 |
| H  | 1.993869 | -2.192212 | -4.098118 |
| H  | 3.336272 | -1.046177 | -3.872982 |
| H  | 1.764611 | -0.728787 | -3.103202 |
| C  | 6.766079 | -2.768671 | -1.148100 |
| H  | 6.638081 | -3.106574 | -2.186643 |
| H  | 6.493869 | -3.609232 | -0.487649 |
| H  | 7.840782 | -2.564640 | -0.995806 |
| C  | 6.598881 | -0.614246 | 0.869060  |
| H  | 7.690695 | -0.559333 | 0.711573  |
| H  | 6.422315 | -1.335115 | 1.684047  |
| H  | 6.273739 | 0.372452  | 1.227952  |
| C  | 6.176569 | 0.045667  | -2.102893 |
| H  | 5.812551 | 1.057573  | -1.877758 |
| H  | 5.742282 | -0.260484 | -3.069295 |
| H  | 7.270811 | 0.109342  | -2.236536 |
| C  | 4.074357 | 3.978256  | 2.452865  |
| H  | 3.950666 | 4.406835  | 3.463442  |
| H  | 3.637801 | 4.689718  | 1.736988  |
| H  | 5.157221 | 3.918940  | 2.251042  |
| C  | 4.097300 | 1.397353  | 3.882145  |
| H  | 4.152918 | 2.108430  | 4.725502  |
| H  | 5.130699 | 1.098811  | 3.636424  |
| H  | 3.567802 | 0.505186  | 4.239981  |
| C  | 1.426512 | 2.506245  | 2.775144  |

|    |           |           |           |
|----|-----------|-----------|-----------|
| H  | 1.257949  | 2.638133  | 3.858030  |
| H  | 0.822673  | 1.648272  | 2.445939  |
| H  | 1.036952  | 3.401140  | 2.266429  |
| C  | 1.811850  | 3.708907  | -0.470183 |
| H  | 0.891824  | 3.137604  | -0.275687 |
| H  | 1.654136  | 4.276264  | -1.403930 |
| H  | 1.934664  | 4.438117  | 0.344135  |
| C  | 4.842579  | 3.636503  | -0.912167 |
| H  | 4.887337  | 4.454029  | -0.176804 |
| H  | 4.853179  | 4.091291  | -1.918205 |
| H  | 5.771704  | 3.051257  | -0.807392 |
| C  | 2.978248  | 1.742558  | -2.369471 |
| H  | 1.982087  | 1.283189  | -2.382421 |
| H  | 3.703608  | 0.962175  | -2.626059 |
| H  | 3.021998  | 2.517010  | -3.156103 |
| Si | -3.590276 | -3.256172 | 0.824281  |
| Si | -3.449807 | -0.544962 | 2.550941  |
| Si | -2.747765 | 2.836090  | -1.439110 |
| Si | -5.524953 | 1.306533  | -0.854847 |
| C  | -2.509285 | -4.301130 | -0.320082 |
| H  | -2.673355 | -5.364488 | -0.072331 |
| H  | -1.435663 | -4.095152 | -0.176378 |
| H  | -2.737358 | -4.177603 | -1.388303 |
| C  | -3.363431 | -4.057161 | 2.522899  |
| H  | -3.574586 | -5.136055 | 2.420488  |
| H  | -4.048144 | -3.661799 | 3.288518  |
| H  | -2.334118 | -3.956335 | 2.901701  |
| C  | -5.397748 | -3.563282 | 0.377884  |
| H  | -5.567639 | -4.653013 | 0.442274  |
| H  | -5.678286 | -3.246880 | -0.636365 |
| H  | -6.093698 | -3.082708 | 1.082988  |
| C  | -2.457935 | -1.228335 | 4.008818  |
| H  | -2.915749 | -2.113782 | 4.472103  |
| H  | -2.387555 | -0.446754 | 4.785338  |
| H  | -1.428471 | -1.492349 | 3.721231  |

|   |           |           |           |
|---|-----------|-----------|-----------|
| C | -2.976406 | 1.272968  | 2.465726  |
| H | -3.371052 | 1.808765  | 3.346116  |
| H | -3.360831 | 1.773876  | 1.571165  |
| H | -1.881119 | 1.399950  | 2.478278  |
| C | -5.280747 | -0.689709 | 2.979729  |
| H | -5.594361 | -1.741710 | 3.072616  |
| H | -5.942733 | -0.206068 | 2.247776  |
| H | -5.457491 | -0.207023 | 3.956862  |
| C | -5.902575 | 2.448714  | 0.597002  |
| H | -5.540877 | 2.059010  | 1.558759  |
| H | -6.995990 | 2.576737  | 0.681774  |
| H | -5.463159 | 3.449105  | 0.454988  |
| C | -6.262931 | -0.392578 | -0.542899 |
| H | -6.250903 | -0.987200 | -1.470514 |
| H | -7.315193 | -0.306175 | -0.221135 |
| H | -5.725438 | -0.961442 | 0.222404  |
| C | -6.447648 | 1.951758  | -2.375921 |
| H | -7.515864 | 1.684486  | -2.287790 |
| H | -6.071140 | 1.484703  | -3.302994 |
| H | -6.389218 | 3.042394  | -2.502957 |
| C | -3.857217 | 4.131706  | -2.251090 |
| H | -4.725083 | 4.414143  | -1.635640 |
| H | -4.230285 | 3.799209  | -3.232918 |
| H | -3.259034 | 5.045202  | -2.415172 |
| C | -1.278958 | 2.672193  | -2.617104 |
| H | -0.493874 | 1.970947  | -2.294516 |
| H | -0.796005 | 3.659255  | -2.715134 |
| H | -1.603757 | 2.358919  | -3.622637 |
| C | -2.112649 | 3.620810  | 0.153707  |
| H | -1.388683 | 3.005016  | 0.707602  |
| H | -2.922987 | 3.887667  | 0.849285  |
| H | -1.590053 | 4.552533  | -0.124085 |

---

--

---

--

[SiPrDis<sub>2</sub>]-Ga=N

--

| Atomic<br>Number | Coordinates (Angstroms) |           |           |
|------------------|-------------------------|-----------|-----------|
|                  | X                       | Y         | Z         |
| N                | 1.149914                | -0.428251 | 0.682656  |
| Ga               | -0.531814               | -0.490324 | 0.381069  |
| Si               | -2.721794               | 0.256722  | -0.380827 |
| Si               | 2.516228                | -0.412365 | -0.380968 |
| C                | -3.469011               | 1.319125  | 1.015353  |
| H                | -4.536917               | 1.438181  | 0.746954  |
| C                | -3.891562               | -1.079259 | -1.077553 |
| H                | -3.593507               | -1.026555 | -2.143550 |
| C                | -1.883010               | 1.133293  | -1.916546 |
| H                | -0.900467               | 1.461678  | -1.529534 |
| C                | -2.532277               | 2.381379  | -2.539387 |
| H                | -1.915052               | 2.731982  | -3.385356 |
| H                | -2.607863               | 3.209728  | -1.825106 |
| H                | -3.539014               | 2.175886  | -2.928883 |
| C                | -1.579028               | 0.099408  | -3.024503 |
| H                | -0.864545               | 0.523444  | -3.748414 |
| H                | -2.490804               | -0.167359 | -3.584093 |
| H                | -1.138339               | -0.834241 | -2.639277 |
| C                | 2.025772                | -1.040516 | -2.137757 |
| H                | 1.313324                | -0.282236 | -2.504141 |
| C                | 1.288031                | -2.388763 | -2.135664 |
| H                | 0.889541                | -2.627522 | -3.138824 |
| H                | 0.443122                | -2.397508 | -1.429444 |
| H                | 1.952575                | -3.217042 | -1.841467 |
| C                | 3.198691                | -1.118392 | -3.131123 |
| H                | 2.845210                | -1.357684 | -4.150968 |
| H                | 3.907202                | -1.912385 | -2.840846 |

|    |           |           |           |
|----|-----------|-----------|-----------|
| H  | 3.767241  | -0.181718 | -3.186089 |
| C  | 2.890836  | 1.498914  | -0.526016 |
| H  | 1.834987  | 1.785123  | -0.315803 |
| C  | 3.816615  | -1.715856 | 0.199474  |
| H  | 3.710024  | -2.443489 | -0.634917 |
| Si | -3.623712 | -2.963997 | -0.818648 |
| Si | -5.721659 | -0.580721 | -1.264872 |
| Si | -2.835815 | 3.119174  | 1.198674  |
| Si | -3.507667 | 0.414901  | 2.701683  |
| C  | -5.034285 | -3.851916 | 0.071436  |
| H  | -4.823968 | -4.935673 | 0.047609  |
| H  | -6.014792 | -3.700391 | -0.404180 |
| H  | -5.119239 | -3.557893 | 1.128004  |
| C  | -3.462366 | -3.706906 | -2.548627 |
| H  | -3.283004 | -4.794232 | -2.488644 |
| H  | -2.608244 | -3.261881 | -3.087915 |
| H  | -4.364878 | -3.549437 | -3.159588 |
| C  | -2.034422 | -3.468470 | 0.071319  |
| H  | -1.146234 | -3.325845 | -0.562990 |
| H  | -2.089702 | -4.549445 | 0.291441  |
| H  | -1.846521 | -2.966592 | 1.033055  |
| C  | -6.522695 | -1.678143 | -2.579287 |
| H  | -6.570069 | -2.742204 | -2.305034 |
| H  | -5.972107 | -1.604511 | -3.532915 |
| H  | -7.555124 | -1.337008 | -2.769249 |
| C  | -5.886153 | 1.172166  | -1.946701 |
| H  | -6.957237 | 1.419717  | -2.051227 |
| H  | -5.435336 | 1.253042  | -2.949287 |
| H  | -5.431187 | 1.942820  | -1.307129 |
| C  | -6.747175 | -0.655835 | 0.314259  |
| H  | -6.777792 | -1.661842 | 0.757925  |
| H  | -7.785359 | -0.367213 | 0.072887  |
| H  | -6.384333 | 0.043667  | 1.082868  |
| C  | -2.985408 | 3.824062  | 2.947938  |
| H  | -2.589486 | 4.854932  | 2.919809  |

|    |           |           |           |
|----|-----------|-----------|-----------|
| H  | -2.416978 | 3.276504  | 3.713673  |
| H  | -4.033571 | 3.886408  | 3.277824  |
| C  | -3.936014 | 4.268070  | 0.169372  |
| H  | -4.301906 | 3.822446  | -0.766273 |
| H  | -3.401049 | 5.198091  | -0.090418 |
| H  | -4.819878 | 4.555997  | 0.765388  |
| C  | -1.012359 | 3.284816  | 0.749007  |
| H  | -0.675972 | 4.306134  | 0.995410  |
| H  | -0.792281 | 3.115496  | -0.313805 |
| H  | -0.385514 | 2.589181  | 1.331309  |
| C  | -1.809717 | 0.437361  | 3.535966  |
| H  | -1.282138 | 1.399222  | 3.462970  |
| H  | -1.132735 | -0.335907 | 3.131210  |
| H  | -1.929424 | 0.204583  | 4.608613  |
| C  | -4.823939 | 1.201007  | 3.814505  |
| H  | -4.414635 | 1.969874  | 4.485907  |
| H  | -5.288736 | 0.422175  | 4.442967  |
| H  | -5.629644 | 1.669987  | 3.224534  |
| C  | -3.993215 | -1.397171 | 2.569139  |
| H  | -3.296845 | -1.984999 | 1.958692  |
| H  | -5.000991 | -1.523333 | 2.153677  |
| H  | -3.992088 | -1.838418 | 3.581497  |
| Si | 3.109656  | 2.502382  | -2.130346 |
| Si | 3.704570  | 2.327753  | 0.986413  |
| Si | 3.244815  | -2.827841 | 1.644215  |
| Si | 5.688661  | -1.427895 | 0.094126  |
| C  | 1.759069  | 2.144630  | -3.412976 |
| H  | 1.796315  | 2.929916  | -4.188652 |
| H  | 0.756668  | 2.186326  | -2.955837 |
| H  | 1.862535  | 1.175181  | -3.919632 |
| C  | 2.846650  | 4.345442  | -1.764922 |
| H  | 2.857268  | 4.895019  | -2.722947 |
| H  | 3.628328  | 4.783840  | -1.126681 |
| H  | 1.874852  | 4.538440  | -1.282587 |
| C  | 4.767138  | 2.437123  | -3.037919 |

|   |          |           |           |
|---|----------|-----------|-----------|
| H | 4.715401 | 3.160240  | -3.871834 |
| H | 5.011502 | 1.456146  | -3.469276 |
| H | 5.609785 | 2.736644  | -2.396153 |
| C | 2.761353 | 3.902535  | 1.491232  |
| H | 3.258760 | 4.823276  | 1.146314  |
| H | 2.696666 | 3.952110  | 2.592615  |
| H | 1.732843 | 3.915708  | 1.100759  |
| C | 3.615310 | 1.219444  | 2.497785  |
| H | 4.122262 | 1.700294  | 3.352820  |
| H | 4.076640 | 0.239739  | 2.337967  |
| H | 2.563980 | 1.040766  | 2.770134  |
| C | 5.503527 | 2.841229  | 0.707297  |
| H | 5.603556 | 3.565183  | -0.117857 |
| H | 6.168544 | 1.993601  | 0.490783  |
| H | 5.880650 | 3.333313  | 1.621452  |
| C | 6.498833 | -0.884314 | 1.713314  |
| H | 6.231651 | 0.143733  | 1.997244  |
| H | 7.596269 | -0.919590 | 1.593942  |
| H | 6.236688 | -1.542820 | 2.556818  |
| C | 6.125769 | -0.171100 | -1.239042 |
| H | 6.013851 | -0.613636 | -2.241616 |
| H | 7.176142 | 0.152405  | -1.136764 |
| H | 5.494229 | 0.721880  | -1.201454 |
| C | 6.545586 | -3.019423 | -0.477872 |
| H | 7.561852 | -2.781478 | -0.839735 |
| H | 5.998895 | -3.479024 | -1.320363 |
| H | 6.642565 | -3.779052 | 0.310895  |
| C | 4.533585 | -4.167513 | 2.027951  |
| H | 5.497097 | -3.764574 | 2.377556  |
| H | 4.734770 | -4.813187 | 1.157160  |
| H | 4.136944 | -4.814026 | 2.831233  |
| C | 1.698976 | -3.807950 | 1.170530  |
| H | 0.835358 | -3.140186 | 1.048147  |
| H | 1.466269 | -4.537578 | 1.966852  |
| H | 1.832020 | -4.371198 | 0.231455  |



|   |          |           |          |
|---|----------|-----------|----------|
| C | 2.878768 | -1.977656 | 3.284823 |
| H | 2.079645 | -1.231744 | 3.170557 |
| H | 3.759160 | -1.481090 | 3.721845 |
| H | 2.541943 | -2.747017 | 4.003112 |

-----  
--  
-----  
--  
Ga=N-[Si<sub>i</sub>PrDis<sub>2</sub>]<sub>2</sub>  
-----

| Atomic<br>Number | Coordinates (Angstroms) |           |           |
|------------------|-------------------------|-----------|-----------|
|                  | X                       | Y         | Z         |
| Ga               | 0.255296                | -0.985310 | -1.704259 |
| N                | -0.027887               | -0.050879 | -0.020938 |
| Si               | -1.684194               | -0.313058 | 0.563109  |
| Si               | 1.617283                | 0.345461  | 0.562959  |
| C                | -2.649032               | -1.334144 | -0.796482 |
| H                | -3.614815               | -1.407748 | -0.251507 |
| C                | -2.813175               | 1.166769  | 1.174765  |
| H                | -2.432104               | 1.198183  | 2.214613  |
| C                | -1.434928               | -1.375107 | 2.189763  |
| H                | -0.385988               | -1.669595 | 2.027691  |
| C                | -2.227614               | -2.685287 | 2.436719  |
| H                | -2.965334               | -2.556315 | 3.240522  |
| H                | -1.552359               | -3.497509 | 2.752899  |
| H                | -2.779678               | -3.044505 | 1.562519  |
| C                | -1.463387               | -0.568218 | 3.508552  |
| H                | -1.045745               | -1.174189 | 4.331389  |
| H                | -2.495781               | -0.310734 | 3.792865  |
| H                | -0.889587               | 0.366173  | 3.470937  |
| C                | 1.488663                | 1.021635  | 2.342294  |
| H                | 0.951969                | 0.199164  | 2.836066  |

|    |           |           |           |
|----|-----------|-----------|-----------|
| C  | 0.608175  | 2.269573  | 2.456931  |
| H  | 0.426616  | 2.525122  | 3.515666  |
| H  | -0.362348 | 2.120147  | 1.977407  |
| H  | 1.075502  | 3.149923  | 1.988867  |
| C  | 2.784688  | 1.247641  | 3.135651  |
| H  | 2.557086  | 1.352410  | 4.211819  |
| H  | 3.286823  | 2.173390  | 2.823735  |
| H  | 3.506636  | 0.432461  | 3.027249  |
| C  | 2.557205  | -1.384748 | 0.635783  |
| H  | 1.687437  | -2.041118 | 0.423190  |
| C  | 2.350935  | 1.793962  | -0.514944 |
| H  | 1.768990  | 2.586662  | 0.004294  |
| Si | -2.640654 | 3.056728  | 0.836127  |
| Si | -4.645973 | 0.776233  | 1.613915  |
| Si | -2.303836 | -3.216997 | -1.088193 |
| Si | -3.316544 | -0.520692 | -2.412866 |
| C  | -4.110511 | 3.958638  | 0.053636  |
| H  | -3.845967 | 5.031839  | 0.033791  |
| H  | -5.038898 | 3.866721  | 0.636757  |
| H  | -4.319518 | 3.656026  | -0.981894 |
| C  | -2.443042 | 3.918066  | 2.520878  |
| H  | -1.930418 | 4.885589  | 2.381769  |
| H  | -1.856519 | 3.336459  | 3.246991  |
| H  | -3.419618 | 4.130033  | 2.982084  |
| C  | -1.155704 | 3.540632  | -0.222554 |
| H  | -0.731733 | 4.483881  | 0.159900  |
| H  | -1.446044 | 3.712314  | -1.268724 |
| H  | -0.364269 | 2.784739  | -0.213642 |
| C  | -5.180029 | 1.906199  | 3.040649  |
| H  | -5.348197 | 2.950337  | 2.736956  |
| H  | -4.443673 | 1.911299  | 3.861101  |
| H  | -6.132546 | 1.528758  | 3.452395  |
| C  | -5.003026 | -0.955053 | 2.280890  |
| H  | -6.087849 | -0.994997 | 2.485468  |
| H  | -4.488511 | -1.158434 | 3.229682  |

|    |           |           |           |
|----|-----------|-----------|-----------|
| H  | -4.772472 | -1.773150 | 1.584229  |
| C  | -5.946728 | 0.979562  | 0.258935  |
| H  | -5.982355 | 1.978130  | -0.196755 |
| H  | -6.928269 | 0.800847  | 0.733772  |
| H  | -5.841650 | 0.239009  | -0.546203 |
| C  | -1.993668 | -3.729973 | -2.884259 |
| H  | -1.778047 | -4.813443 | -2.867477 |
| H  | -1.128586 | -3.230388 | -3.343939 |
| H  | -2.868269 | -3.581503 | -3.535221 |
| C  | -3.869003 | -4.177847 | -0.622069 |
| H  | -4.214863 | -4.004654 | 0.408461  |
| H  | -3.689162 | -5.261243 | -0.735650 |
| H  | -4.697544 | -3.909480 | -1.297975 |
| C  | -0.810696 | -3.926579 | -0.142893 |
| H  | -1.140607 | -4.607854 | 0.656596  |
| H  | -0.174907 | -3.163575 | 0.329087  |
| H  | -0.176907 | -4.506714 | -0.833654 |
| C  | -2.309234 | -0.703850 | -4.011231 |
| H  | -1.216718 | -0.678356 | -3.883390 |
| H  | -2.577653 | 0.142846  | -4.666206 |
| H  | -2.549826 | -1.630937 | -4.549879 |
| C  | -4.993387 | -1.310918 | -2.804408 |
| H  | -4.881016 | -2.340018 | -3.182544 |
| H  | -5.503725 | -0.728421 | -3.591263 |
| H  | -5.665428 | -1.351617 | -1.932579 |
| C  | -3.570085 | 1.331195  | -2.242237 |
| H  | -2.633170 | 1.855435  | -2.014909 |
| H  | -4.297492 | 1.585363  | -1.468171 |
| H  | -3.946746 | 1.726098  | -3.202412 |
| Si | 3.059764  | -2.249791 | 2.289056  |
| Si | 3.775309  | -2.000662 | -0.728132 |
| Si | 1.867548  | 2.367544  | -2.294834 |
| Si | 4.126527  | 2.432624  | -0.108832 |
| C  | 1.812200  | -2.142695 | 3.705059  |
| H  | 2.175536  | -2.821864 | 4.497269  |

|   |          |           |           |
|---|----------|-----------|-----------|
| H | 0.812440 | -2.494444 | 3.412392  |
| H | 1.712190 | -1.145427 | 4.152530  |
| C | 3.120375 | -4.116371 | 1.953415  |
| H | 3.194673 | -4.636198 | 2.924947  |
| H | 3.984150 | -4.432770 | 1.349850  |
| H | 2.207063 | -4.478110 | 1.453522  |
| C | 4.739765 | -1.784729 | 3.047397  |
| H | 5.263926 | -2.714986 | 3.327531  |
| H | 4.610922 | -1.196164 | 3.969476  |
| H | 5.409304 | -1.223525 | 2.384785  |
| C | 3.122741 | -3.621325 | -1.458651 |
| H | 3.232997 | -4.479743 | -0.779783 |
| H | 3.681518 | -3.852294 | -2.382774 |
| H | 2.057020 | -3.542639 | -1.731912 |
| C | 3.938280 | -0.830073 | -2.182810 |
| H | 4.648859 | -1.259935 | -2.910556 |
| H | 4.309099 | 0.161280  | -1.898402 |
| H | 2.979305 | -0.696867 | -2.703486 |
| C | 5.555257 | -2.321056 | -0.171004 |
| H | 5.650881 | -3.061100 | 0.636364  |
| H | 6.073084 | -1.403768 | 0.146122  |
| H | 6.102470 | -2.715598 | -1.046018 |
| C | 5.256888 | 2.830986  | -1.579107 |
| H | 5.590890 | 1.932560  | -2.120846 |
| H | 6.161534 | 3.296654  | -1.147159 |
| H | 4.841978 | 3.538761  | -2.309811 |
| C | 5.180826 | 1.242772  | 0.919596  |
| H | 5.356926 | 1.628803  | 1.934473  |
| H | 6.165357 | 1.107654  | 0.441513  |
| H | 4.722553 | 0.253391  | 1.021043  |
| C | 3.959634 | 4.077396  | 0.815597  |
| H | 4.951221 | 4.421744  | 1.158155  |
| H | 3.306686 | 4.011133  | 1.699818  |
| H | 3.545929 | 4.859946  | 0.159298  |
| C | 1.939902 | 4.263078  | -2.245386 |

|   |           |          |           |
|---|-----------|----------|-----------|
| H | 2.960104  | 4.661094 | -2.134823 |
| H | 1.329825  | 4.668482 | -1.422233 |
| H | 1.531964  | 4.664189 | -3.189657 |
| C | 0.101210  | 1.961448 | -2.865050 |
| H | -0.560510 | 1.620501 | -2.062846 |
| H | 0.108350  | 1.200174 | -3.660370 |
| H | -0.351308 | 2.869987 | -3.297586 |
| C | 2.900219  | 1.826736 | -3.785714 |
| H | 2.593679  | 0.834298 | -4.148678 |
| H | 3.986747  | 1.811872 | -3.644431 |
| H | 2.680033  | 2.547485 | -4.594475 |

-----  
--  
-----  
--  
Tbt<sub>2</sub>-Ga≡N-Tbt<sub>2</sub>

-----  
--

| Atomic<br>Number | Coordinates (Angstroms) |           |           |
|------------------|-------------------------|-----------|-----------|
|                  | X                       | Y         | Z         |
| C                | -2.942153               | 1.309574  | -0.128880 |
| C                | -3.706814               | -1.424227 | -0.267061 |
| C                | -4.121005               | 0.846203  | 0.485136  |
| C                | -2.129837               | 0.346339  | -0.798508 |
| C                | -2.526114               | -1.018875 | -0.923641 |
| C                | -4.495126               | -0.513243 | 0.468754  |
| H                | -4.763175               | 1.552014  | 1.013685  |
| H                | -4.010856               | -2.469528 | -0.319192 |
| C                | -2.567198               | 2.784821  | -0.115598 |
| H                | -1.463970               | 2.872425  | -0.234889 |
| C                | -5.728742               | -0.955098 | 1.223063  |
| H                | -6.154332               | -0.049197 | 1.700568  |
| C                | -1.710853               | -2.007517 | -1.744931 |

|    |           |           |           |
|----|-----------|-----------|-----------|
| H  | -0.763948 | -1.502794 | -2.045475 |
| Si | -1.086131 | -3.559192 | -0.812423 |
| Si | -2.533365 | -2.314220 | -3.441999 |
| Si | -7.116231 | -1.512498 | 0.040837  |
| Si | -5.289998 | -2.043494 | 2.727120  |
| Si | -3.267983 | 3.631639  | -1.688404 |
| Si | -2.867543 | 3.740443  | 1.512469  |
| C  | -4.247022 | -3.071315 | -3.273041 |
| H  | -4.225305 | -4.050846 | -2.772486 |
| H  | -4.688476 | -3.216869 | -4.274095 |
| H  | -4.922373 | -2.415201 | -2.705345 |
| C  | -2.694361 | -0.650045 | -4.304449 |
| H  | -3.364004 | 0.017551  | -3.739879 |
| H  | -3.108726 | -0.766696 | -5.320196 |
| H  | -1.718157 | -0.146506 | -4.397985 |
| C  | -1.457880 | -3.449056 | -4.496134 |
| H  | -0.415616 | -3.096146 | -4.549797 |
| H  | -1.852083 | -3.480677 | -5.526724 |
| H  | -1.443222 | -4.483565 | -4.117029 |
| C  | 0.517751  | -4.182868 | -1.579680 |
| H  | 0.409884  | -4.487274 | -2.630838 |
| H  | 0.869295  | -5.060971 | -1.010634 |
| H  | 1.314805  | -3.426326 | -1.529734 |
| C  | -2.329607 | -4.978082 | -0.821413 |
| H  | -1.952444 | -5.797139 | -0.184416 |
| H  | -2.470647 | -5.390161 | -1.833957 |
| H  | -3.318193 | -4.690304 | -0.433079 |
| C  | -0.696471 | -3.032926 | 0.941367  |
| H  | -1.582565 | -2.654532 | 1.472386  |
| H  | 0.055330  | -2.226918 | 0.935277  |
| H  | -0.275115 | -3.867498 | 1.525264  |
| C  | -7.014087 | -0.429821 | -1.498974 |
| H  | -6.035455 | -0.521413 | -1.994759 |
| H  | -7.149295 | 0.632956  | -1.237346 |
| H  | -7.795398 | -0.700091 | -2.229397 |

|   |           |           |           |
|---|-----------|-----------|-----------|
| C | -6.981985 | -3.331134 | -0.436955 |
| H | -7.674576 | -3.563279 | -1.264178 |
| H | -7.244808 | -3.985334 | 0.410651  |
| H | -5.969563 | -3.603482 | -0.770671 |
| C | -8.781861 | -1.213949 | 0.873488  |
| H | -9.605339 | -1.339153 | 0.149255  |
| H | -8.846525 | -0.187471 | 1.273823  |
| H | -8.962037 | -1.909273 | 1.708668  |
| C | -6.837956 | -2.276536 | 3.779763  |
| H | -7.349696 | -1.318178 | 3.970474  |
| H | -6.578100 | -2.716255 | 4.758135  |
| H | -7.563537 | -2.951664 | 3.297117  |
| C | -4.599326 | -3.737235 | 2.274646  |
| H | -4.375564 | -4.297789 | 3.199329  |
| H | -3.659538 | -3.656916 | 1.709562  |
| H | -5.303793 | -4.340522 | 1.682412  |
| C | -3.976506 | -1.127966 | 3.720692  |
| H | -3.697434 | -1.691285 | 4.627896  |
| H | -4.326785 | -0.132343 | 4.040845  |
| H | -3.062629 | -0.981021 | 3.122642  |
| C | -3.073919 | 5.505688  | -1.628182 |
| H | -3.392982 | 5.931081  | -2.595719 |
| H | -2.022749 | 5.796401  | -1.470625 |
| H | -3.677020 | 5.982212  | -0.840293 |
| C | -2.286520 | 3.036588  | -3.180830 |
| H | -1.232353 | 3.353367  | -3.109316 |
| H | -2.693126 | 3.464612  | -4.113437 |
| H | -2.311824 | 1.942388  | -3.281674 |
| C | -5.078644 | 3.162666  | -1.885832 |
| H | -5.187502 | 2.077611  | -2.036291 |
| H | -5.521911 | 3.673795  | -2.757336 |
| H | -5.671166 | 3.434706  | -0.997704 |
| C | -1.800871 | 5.303763  | 1.511837  |
| H | -1.382478 | 5.476592  | 2.517357  |
| H | -2.386007 | 6.194914  | 1.235936  |

|    |           |           |           |
|----|-----------|-----------|-----------|
| H  | -0.950598 | 5.238103  | 0.816811  |
| C  | -2.350428 | 2.649976  | 2.951082  |
| H  | -2.987985 | 1.759360  | 3.050879  |
| H  | -2.394480 | 3.207735  | 3.902058  |
| H  | -1.315115 | 2.301827  | 2.818305  |
| C  | -4.665193 | 4.279711  | 1.736815  |
| H  | -5.373333 | 3.436995  | 1.775735  |
| H  | -4.990495 | 4.952393  | 0.926473  |
| H  | -4.763948 | 4.837056  | 2.684941  |
| C  | 3.399252  | 0.570726  | -0.901374 |
| C  | 3.569183  | -0.429119 | 1.724945  |
| C  | 2.330766  | 0.814159  | 0.022089  |
| C  | 4.429791  | -0.308613 | -0.519150 |
| C  | 4.514599  | -0.859449 | 0.775291  |
| C  | 2.482009  | 0.399933  | 1.399310  |
| H  | 5.196713  | -0.555907 | -1.257604 |
| H  | 3.686867  | -0.772520 | 2.754307  |
| C  | 3.492591  | 1.237169  | -2.273382 |
| H  | 4.553588  | 1.084085  | -2.563767 |
| C  | 1.541567  | 0.919424  | 2.484618  |
| H  | 0.544503  | 1.073546  | 2.029008  |
| C  | 5.601946  | -1.841976 | 1.164488  |
| H  | 5.535116  | -1.988593 | 2.261853  |
| Si | 7.343233  | -1.118932 | 0.914628  |
| Si | 5.209110  | -3.569273 | 0.472009  |
| Si | 1.270755  | -0.148886 | 4.046231  |
| Si | 2.146501  | 2.690355  | 2.940604  |
| Si | 3.468315  | 3.148458  | -2.265571 |
| Si | 2.648322  | 0.405708  | -3.766409 |
| C  | 3.548698  | -4.120861 | 1.181901  |
| H  | 3.572940  | -4.163940 | 2.283926  |
| H  | 3.273218  | -5.124252 | 0.812781  |
| H  | 2.745999  | -3.423626 | 0.894143  |
| C  | 6.540525  | -4.803157 | 0.994278  |
| H  | 6.708858  | -4.781196 | 2.084302  |



|   |           |           |           |
|---|-----------|-----------|-----------|
| H | 7.505425  | -4.593913 | 0.503331  |
| H | 6.246019  | -5.831805 | 0.722480  |
| C | 5.060177  | -3.585087 | -1.406354 |
| H | 4.877474  | -4.613994 | -1.763235 |
| H | 5.966016  | -3.209241 | -1.906356 |
| H | 4.212119  | -2.963555 | -1.730482 |
| C | 8.026063  | -1.419968 | -0.820886 |
| H | 8.151916  | -2.495635 | -1.027578 |
| H | 9.014810  | -0.941434 | -0.930084 |
| H | 7.369813  | -1.002541 | -1.601629 |
| C | 8.511495  | -1.906411 | 2.171410  |
| H | 8.668026  | -2.980019 | 1.979649  |
| H | 8.109366  | -1.805428 | 3.194516  |
| H | 9.498981  | -1.413525 | 2.152933  |
| C | 7.263232  | 0.736173  | 1.235571  |
| H | 6.835247  | 0.944137  | 2.230564  |
| H | 6.622390  | 1.240719  | 0.495899  |
| H | 8.266623  | 1.193569  | 1.193094  |
| C | -0.326506 | 0.366063  | 4.915695  |
| H | -1.196129 | 0.256986  | 4.249298  |
| H | -0.321012 | 1.398363  | 5.292028  |
| H | -0.492627 | -0.302606 | 5.778997  |
| C | 1.050596  | -1.985448 | 3.689234  |
| H | 1.118452  | -2.547734 | 4.637447  |
| H | 1.796921  | -2.395923 | 2.994976  |
| H | 0.053810  | -2.176951 | 3.268343  |
| C | 2.682852  | -0.003957 | 5.298483  |
| H | 2.829886  | 1.023644  | 5.663799  |
| H | 3.646113  | -0.350918 | 4.892239  |
| H | 2.449253  | -0.635037 | 6.174388  |
| C | 1.699473  | 3.905189  | 1.577475  |
| H | 2.301136  | 3.750052  | 0.675850  |
| H | 1.846769  | 4.944141  | 1.920649  |
| H | 0.646822  | 3.782935  | 1.287756  |
| C | 1.346055  | 3.398263  | 4.504727  |

|    |           |           |           |
|----|-----------|-----------|-----------|
| H  | 1.546474  | 2.818983  | 5.418200  |
| H  | 0.253984  | 3.495717  | 4.397604  |
| H  | 1.749435  | 4.414545  | 4.663206  |
| C  | 4.014923  | 2.669993  | 3.177969  |
| H  | 4.526679  | 2.345016  | 2.260068  |
| H  | 4.320154  | 1.985164  | 3.984050  |
| H  | 4.381358  | 3.678956  | 3.435312  |
| C  | 4.588062  | 3.690599  | -0.848490 |
| H  | 4.328309  | 3.180487  | 0.089760  |
| H  | 4.535584  | 4.778431  | -0.673764 |
| H  | 5.637036  | 3.435950  | -1.079310 |
| C  | 4.276621  | 3.726356  | -3.879292 |
| H  | 3.645981  | 3.526837  | -4.761534 |
| H  | 5.255122  | 3.246799  | -4.050041 |
| H  | 4.443516  | 4.817285  | -3.840758 |
| C  | 1.802536  | 4.032222  | -2.193588 |
| H  | 1.246629  | 3.793061  | -1.279042 |
| H  | 1.176763  | 3.756516  | -3.056579 |
| H  | 1.969211  | 5.123666  | -2.239830 |
| C  | 3.944749  | 0.265271  | -5.136858 |
| H  | 4.265213  | 1.255278  | -5.499512 |
| H  | 3.552119  | -0.296276 | -6.002481 |
| H  | 4.844619  | -0.263031 | -4.776696 |
| C  | 1.172324  | 1.315217  | -4.524246 |
| H  | 1.450768  | 2.310579  | -4.905703 |
| H  | 0.336123  | 1.458876  | -3.820594 |
| H  | 0.785896  | 0.731346  | -5.378581 |
| C  | 2.093009  | -1.338003 | -3.326560 |
| H  | 2.955961  | -1.981155 | -3.095924 |
| H  | 1.543647  | -1.800004 | -4.164544 |
| H  | 1.437259  | -1.348357 | -2.441715 |
| Ga | -0.260398 | 0.783714  | -1.091619 |
| N  | 1.164166  | 1.447782  | -0.388224 |

-----  
--

-----  
--  
Tbt<sub>2</sub>-Ga=N  
-----

-----

| Atomic<br>Number | Coordinates (Angstroms) |           |           |
|------------------|-------------------------|-----------|-----------|
|                  | X                       | Y         | Z         |
| C                | 2.641803                | 1.277356  | 0.165416  |
| C                | 3.305259                | -1.455086 | 0.193366  |
| C                | 3.910717                | 0.839356  | -0.272277 |
| C                | 1.664307                | 0.314938  | 0.578661  |
| C                | 2.059133                | -1.051805 | 0.719582  |
| C                | 4.234723                | -0.528184 | -0.339794 |
| H                | 4.660998                | 1.566045  | -0.584775 |
| H                | 3.583255                | -2.506455 | 0.242716  |
| C                | 2.282220                | 2.764810  | 0.272078  |
| H                | 0.425204                | 3.785375  | 0.214198  |
| C                | 5.558447                | -0.958731 | -0.952391 |
| H                | 6.185280                | -0.047477 | -1.034433 |
| C                | 1.264321                | -1.994110 | 1.622704  |
| H                | 0.389900                | -1.427522 | 1.988706  |
| Si               | 0.473174                | -3.553009 | 0.854496  |
| Si               | 2.310365                | -2.326354 | 3.198849  |
| Si               | 6.621352                | -2.107400 | 0.129048  |
| Si               | 5.299529                | -1.464096 | -2.777533 |
| Si               | 3.155492                | 3.449298  | 1.874511  |
| Si               | 2.760995                | 3.801061  | -1.279574 |
| C                | 3.548355                | -3.727813 | 2.938452  |
| H                | 3.059714                | -4.669519 | 2.643447  |
| H                | 4.090767                | -3.916953 | 3.881429  |
| H                | 4.300316                | -3.487646 | 2.175871  |
| C                | 3.247763                | -0.768871 | 3.702343  |
| H                | 3.667993                | -0.229212 | 2.842200  |

-----

|   |           |           |           |
|---|-----------|-----------|-----------|
| H | 4.076976  | -1.024748 | 4.383960  |
| H | 2.585138  | -0.075355 | 4.241314  |
| C | 1.230093  | -2.797841 | 4.674051  |
| H | 0.447789  | -2.048604 | 4.864876  |
| H | 1.865724  | -2.848265 | 5.575898  |
| H | 0.741429  | -3.774774 | 4.556455  |
| C | -1.182024 | -3.065368 | 0.108205  |
| H | -1.951694 | -3.036217 | 0.892106  |
| H | -1.506917 | -3.811529 | -0.631797 |
| H | -1.177310 | -2.080101 | -0.373584 |
| C | 0.041184  | -4.877347 | 2.134371  |
| H | -0.474599 | -5.701617 | 1.609892  |
| H | -0.652157 | -4.496696 | 2.900629  |
| H | 0.913883  | -5.309990 | 2.646247  |
| C | 1.588665  | -4.366955 | -0.422909 |
| H | 2.528254  | -4.724348 | 0.029235  |
| H | 1.848359  | -3.689754 | -1.246889 |
| H | 1.075092  | -5.242801 | -0.856061 |
| C | 6.508990  | -1.525827 | 1.916040  |
| H | 5.481455  | -1.552635 | 2.299048  |
| H | 6.864010  | -0.484005 | 1.999140  |
| H | 7.136696  | -2.149333 | 2.575845  |
| C | 6.129499  | -3.925187 | -0.026253 |
| H | 6.707679  | -4.543833 | 0.681787  |
| H | 6.337908  | -4.302719 | -1.040846 |
| H | 5.063176  | -4.104836 | 0.176156  |
| C | 8.429638  | -1.940821 | -0.392257 |
| H | 9.082607  | -2.436420 | 0.347437  |
| H | 8.732878  | -0.880354 | -0.438627 |
| H | 8.637871  | -2.393489 | -1.373483 |
| C | 6.806301  | -2.325403 | -3.522499 |
| H | 7.709998  | -1.696954 | -3.462843 |
| H | 6.614906  | -2.526177 | -4.591512 |
| H | 7.032552  | -3.290736 | -3.042502 |
| C | 3.807778  | -2.590282 | -2.970158 |

|   |           |           |           |
|---|-----------|-----------|-----------|
| H | 3.670634  | -2.864513 | -4.030349 |
| H | 2.886768  | -2.096533 | -2.627667 |
| H | 3.924580  | -3.521906 | -2.394652 |
| C | 5.024515  | 0.121837  | -3.756353 |
| H | 4.769797  | -0.085657 | -4.809456 |
| H | 5.927617  | 0.756172  | -3.745056 |
| H | 4.202778  | 0.709372  | -3.322604 |
| C | 3.100264  | 5.337198  | 1.945114  |
| H | 3.428533  | 5.658960  | 2.949301  |
| H | 2.077103  | 5.719222  | 1.796932  |
| H | 3.759124  | 5.827768  | 1.212057  |
| C | 2.219923  | 2.840114  | 3.378194  |
| H | 1.249790  | 3.350366  | 3.466890  |
| H | 2.799978  | 3.034623  | 4.296470  |
| H | 2.033826  | 1.762371  | 3.316476  |
| C | 4.956381  | 2.900283  | 2.021698  |
| H | 5.031640  | 1.806607  | 2.119339  |
| H | 5.404432  | 3.352138  | 2.924383  |
| H | 5.569584  | 3.201889  | 1.158830  |
| C | 1.912287  | 5.494563  | -1.257341 |
| H | 1.953205  | 5.912936  | -2.278547 |
| H | 2.418732  | 6.205965  | -0.589149 |
| H | 0.849919  | 5.470407  | -0.969378 |
| C | 2.189872  | 2.887538  | -2.809916 |
| H | 2.795747  | 1.989510  | -2.983548 |
| H | 2.262016  | 3.523439  | -3.707839 |
| H | 1.147592  | 2.564496  | -2.704600 |
| C | 4.607787  | 4.167056  | -1.460042 |
| H | 5.215719  | 3.262616  | -1.614742 |
| H | 5.017990  | 4.709413  | -0.594145 |
| H | 4.750508  | 4.810851  | -2.346284 |
| C | -2.999763 | 0.390559  | 1.002555  |
| C | -3.233327 | -0.376704 | -1.695358 |
| C | -1.914768 | 0.673908  | 0.110577  |
| C | -4.127635 | -0.311952 | 0.522860  |

|    |           |           |           |
|----|-----------|-----------|-----------|
| C  | -4.270185 | -0.724047 | -0.814740 |
| C  | -2.082786 | 0.327222  | -1.277844 |
| H  | -4.936097 | -0.523239 | 1.223650  |
| H  | -3.347079 | -0.625265 | -2.751041 |
| C  | -3.142147 | 0.918112  | 2.432873  |
| H  | -4.157209 | 0.589272  | 2.741056  |
| C  | -1.130230 | 0.808166  | -2.375067 |
| H  | -0.165167 | 1.119350  | -1.925293 |
| C  | -5.505351 | -1.455473 | -1.307828 |
| H  | -5.441869 | -1.495317 | -2.414290 |
| Si | -7.129424 | -0.506262 | -1.001536 |
| Si | -5.442308 | -3.294680 | -0.795460 |
| Si | -0.614479 | -0.458348 | -3.723391 |
| Si | -1.876369 | 2.435618  | -3.100838 |
| Si | -3.414733 | 2.811180  | 2.490021  |
| Si | -2.165036 | 0.077136  | 3.828174  |
| C  | -4.134379 | -4.097854 | -1.889525 |
| H  | -4.514080 | -4.212503 | -2.919679 |
| H  | -3.843839 | -5.097554 | -1.525036 |
| H  | -3.228272 | -3.476509 | -1.934085 |
| C  | -7.075217 | -4.189315 | -1.104831 |
| H  | -7.411992 | -4.088870 | -2.149418 |
| H  | -7.884480 | -3.826828 | -0.450781 |
| H  | -6.944064 | -5.266638 | -0.900790 |
| C  | -5.016643 | -3.485509 | 1.027854  |
| H  | -4.941609 | -4.554521 | 1.291480  |
| H  | -5.791486 | -3.035468 | 1.670411  |
| H  | -4.059432 | -3.006144 | 1.274281  |
| C  | -7.743662 | -0.646101 | 0.779385  |
| H  | -7.867406 | -1.694662 | 1.096227  |
| H  | -8.726709 | -0.152844 | 0.876059  |
| H  | -7.060279 | -0.156123 | 1.491434  |
| C  | -8.467816 | -1.165800 | -2.160728 |
| H  | -8.877163 | -2.135093 | -1.837897 |
| H  | -8.081515 | -1.288819 | -3.187553 |

|   |           |           |           |
|---|-----------|-----------|-----------|
| H | -9.306462 | -0.449121 | -2.208944 |
| C | -6.866191 | 1.309199  | -1.423174 |
| H | -6.638574 | 1.433634  | -2.494899 |
| H | -6.033351 | 1.743914  | -0.852015 |
| H | -7.774620 | 1.896563  | -1.202915 |
| C | 1.023133  | 0.071303  | -4.488090 |
| H | 1.819347  | 0.070208  | -3.729259 |
| H | 1.002346  | 1.066301  | -4.952953 |
| H | 1.310549  | -0.659227 | -5.264037 |
| C | -0.310247 | -2.163785 | -3.002935 |
| H | 0.147030  | -2.812409 | -3.769567 |
| H | -1.235036 | -2.645855 | -2.660633 |
| H | 0.381657  | -2.114728 | -2.149907 |
| C | -1.890502 | -0.640499 | -5.108265 |
| H | -2.137725 | 0.314741  | -5.595714 |
| H | -2.833311 | -1.092569 | -4.760790 |
| H | -1.478542 | -1.308445 | -5.885278 |
| C | -1.674397 | 3.823090  | -1.841698 |
| H | -2.315758 | 4.680687  | -2.107891 |
| H | -0.633655 | 4.175734  | -1.820543 |
| H | -1.946036 | 3.501756  | -0.826178 |
| C | -1.049679 | 3.017722  | -4.697342 |
| H | -1.152950 | 2.298627  | -5.524030 |
| H | 0.020173  | 3.234228  | -4.569170 |
| H | -1.540814 | 3.955063  | -5.013853 |
| C | -3.710614 | 2.232071  | -3.464749 |
| H | -4.284528 | 2.040750  | -2.548377 |
| H | -3.916285 | 1.409528  | -4.166975 |
| H | -4.094295 | 3.163248  | -3.917500 |
| C | -4.330647 | 3.306556  | 0.919767  |
| H | -3.839203 | 2.931822  | 0.011832  |
| H | -4.417026 | 4.403801  | 0.839242  |
| H | -5.352375 | 2.891771  | 0.938608  |
| C | -4.561150 | 3.228588  | 3.933723  |
| H | -4.064237 | 3.148637  | 4.912918  |

|    |           |           |          |
|----|-----------|-----------|----------|
| H  | -5.446995 | 2.570182  | 3.952446 |
| H  | -4.924281 | 4.266524  | 3.830255 |
| C  | -1.846359 | 3.831325  | 2.704836 |
| H  | -2.078023 | 4.902645  | 2.569975 |
| H  | -1.042903 | 3.572537  | 1.999068 |
| H  | -1.438474 | 3.711695  | 3.722739 |
| C  | -3.000601 | 0.475572  | 5.473903 |
| H  | -2.818141 | 1.513643  | 5.793940 |
| H  | -2.598990 | -0.186218 | 6.260955 |
| H  | -4.092085 | 0.323191  | 5.434383 |
| C  | -0.383399 | 0.644059  | 3.974928 |
| H  | -0.327128 | 1.737427  | 4.063151 |
| H  | 0.253673  | 0.347529  | 3.127885 |
| H  | 0.081450  | 0.221075  | 4.880642 |
| C  | -2.263505 | -1.782006 | 3.567891 |
| H  | -3.310320 | -2.101372 | 3.435971 |
| H  | -1.847299 | -2.331348 | 4.427274 |
| H  | -1.709364 | -2.089262 | 2.672152 |
| N  | 0.802293  | 2.873258  | 0.455610 |
| Ga | -0.062488 | 1.248266  | 0.548355 |

-----  
--  
-----  
--  
Ga=N-Tbt<sub>2</sub>

-----

| Atomic<br>Number | Coordinates (Angstroms) |           |           |
|------------------|-------------------------|-----------|-----------|
|                  | X                       | Y         | Z         |
| C                | -2.267556               | 1.152321  | 0.528531  |
| C                | -2.877571               | -1.250785 | -0.822693 |
| C                | -3.531652               | 0.526857  | 0.630242  |
| C                | -1.200385               | 0.452160  | -0.155611 |

-----



|    |           |           |           |
|----|-----------|-----------|-----------|
| C  | -1.591109 | -0.678312 | -0.984892 |
| C  | -3.865346 | -0.691015 | 0.013778  |
| H  | -4.311004 | 1.043761  | 1.190898  |
| H  | -3.134808 | -2.114274 | -1.435047 |
| C  | -2.181769 | 2.578865  | 1.079406  |
| H  | -1.128641 | 2.907518  | 1.067716  |
| C  | -5.262973 | -1.264612 | 0.207466  |
| H  | -5.832442 | -0.489972 | 0.761034  |
| C  | -0.782653 | -1.121102 | -2.206891 |
| H  | 0.168027  | -0.559088 | -2.217386 |
| Si | -0.180169 | -2.936584 | -2.296181 |
| Si | -1.700759 | -0.640854 | -3.841533 |
| Si | -6.336734 | -1.509643 | -1.352604 |
| Si | -5.296025 | -2.724565 | 1.438697  |
| Si | -3.185097 | 3.878988  | 0.041125  |
| Si | -2.733559 | 2.805489  | 2.918814  |
| C  | -2.886752 | -1.985515 | -4.444312 |
| H  | -2.368433 | -2.908237 | -4.746797 |
| H  | -3.426016 | -1.606405 | -5.330205 |
| H  | -3.644958 | -2.256197 | -3.695847 |
| C  | -2.701212 | 0.949295  | -3.657432 |
| H  | -3.195754 | 1.041829  | -2.680585 |
| H  | -3.478384 | 0.992670  | -4.439981 |
| H  | -2.048749 | 1.825682  | -3.798968 |
| C  | -0.476812 | -0.292608 | -5.237784 |
| H  | 0.169189  | 0.565481  | -4.995968 |
| H  | -1.044913 | -0.028416 | -6.147661 |
| H  | 0.171411  | -1.142857 | -5.487805 |
| C  | 1.218904  | -3.166128 | -1.087263 |
| H  | 2.094540  | -2.577523 | -1.393064 |
| H  | 1.515447  | -4.225590 | -1.051423 |
| H  | 0.962221  | -2.836678 | -0.076847 |
| C  | 0.568074  | -3.351739 | -3.984640 |
| H  | 1.006789  | -4.363120 | -3.909287 |
| H  | 1.386030  | -2.665035 | -4.254721 |

|   |           |           |           |
|---|-----------|-----------|-----------|
| H | -0.154424 | -3.371735 | -4.814301 |
| C | -1.524232 | -4.216549 | -1.963294 |
| H | -2.403713 | -4.105841 | -2.614928 |
| H | -1.866578 | -4.193108 | -0.920118 |
| H | -1.104955 | -5.221291 | -2.148612 |
| C | -5.961159 | -0.184920 | -2.632384 |
| H | -4.973063 | -0.323729 | -3.087608 |
| H | -5.989040 | 0.824250  | -2.190412 |
| H | -6.713813 | -0.219231 | -3.439280 |
| C | -6.114640 | -3.206405 | -2.149922 |
| H | -6.600754 | -3.225678 | -3.140651 |
| H | -6.574028 | -4.002790 | -1.541994 |
| H | -5.055086 | -3.468083 | -2.294207 |
| C | -8.154691 | -1.309707 | -0.871696 |
| H | -8.770702 | -1.203895 | -1.781835 |
| H | -8.312557 | -0.403697 | -0.261552 |
| H | -8.547701 | -2.166352 | -0.304563 |
| C | -7.071467 | -3.228676 | 1.843383  |
| H | -7.702615 | -2.361708 | 2.099526  |
| H | -7.065901 | -3.903796 | 2.717201  |
| H | -7.559632 | -3.769168 | 1.016743  |
| C | -4.377455 | -4.238762 | 0.810787  |
| H | -4.326511 | -5.000719 | 1.608155  |
| H | -3.346735 | -3.989084 | 0.527884  |
| H | -4.868508 | -4.698812 | -0.059401 |
| C | -4.493184 | -2.117669 | 3.024436  |
| H | -4.457105 | -2.910278 | 3.790340  |
| H | -5.049517 | -1.265061 | 3.449784  |
| H | -3.464095 | -1.785150 | 2.833563  |
| C | -3.116884 | 5.571388  | 0.888564  |
| H | -3.521308 | 6.320824  | 0.185847  |
| H | -2.080770 | 5.867635  | 1.119950  |
| H | -3.701983 | 5.642938  | 1.815618  |
| C | -2.586613 | 4.269406  | -1.705607 |
| H | -1.577389 | 4.707401  | -1.737232 |

|    |           |           |           |
|----|-----------|-----------|-----------|
| H  | -3.282177 | 5.031240  | -2.104704 |
| H  | -2.622016 | 3.413308  | -2.392232 |
| C  | -4.980840 | 3.357343  | -0.220915 |
| H  | -5.032513 | 2.470453  | -0.871158 |
| H  | -5.508664 | 4.178477  | -0.737710 |
| H  | -5.535409 | 3.132816  | 0.699056  |
| C  | -1.799965 | 4.271666  | 3.673510  |
| H  | -1.589153 | 4.074503  | 4.738439  |
| H  | -2.391524 | 5.198090  | 3.624479  |
| H  | -0.838102 | 4.463704  | 3.175418  |
| C  | -2.414394 | 1.250733  | 3.913192  |
| H  | -3.058020 | 0.430234  | 3.566061  |
| H  | -2.644800 | 1.435437  | 4.976359  |
| H  | -1.375815 | 0.915763  | 3.847099  |
| C  | -4.577741 | 3.140225  | 3.202921  |
| H  | -5.220461 | 2.315854  | 2.855135  |
| H  | -4.947708 | 4.072883  | 2.753386  |
| H  | -4.727037 | 3.223146  | 4.294679  |
| C  | 2.604864  | 0.811530  | -0.471482 |
| C  | 2.650913  | -1.293367 | 1.363943  |
| C  | 1.346503  | 0.431923  | 0.159161  |
| C  | 3.745210  | -0.002755 | -0.281488 |
| C  | 3.807384  | -1.095004 | 0.596081  |
| C  | 1.466448  | -0.528475 | 1.246396  |
| H  | 4.652319  | 0.280103  | -0.819475 |
| H  | 2.700496  | -2.020742 | 2.171286  |
| C  | 2.957612  | 2.116849  | -1.242005 |
| H  | 4.062609  | 2.103584  | -1.117364 |
| C  | 0.522922  | -0.598422 | 2.458724  |
| H  | -0.418408 | -0.075463 | 2.224967  |
| C  | 5.084555  | -1.896574 | 0.837534  |
| H  | 4.981281  | -2.365897 | 1.837034  |
| Si | 6.692261  | -0.877966 | 1.007536  |
| Si | 5.231301  | -3.398334 | -0.334822 |
| Si | -0.027040 | -2.316374 | 3.113943  |

|    |           |           |           |
|----|-----------|-----------|-----------|
| Si | 1.395984  | 0.448366  | 3.844871  |
| Si | 2.891721  | 3.784300  | -0.291941 |
| Si | 3.127172  | 2.093813  | -3.176721 |
| C  | 3.996183  | -4.700728 | 0.246296  |
| H  | 4.411920  | -5.247625 | 1.110348  |
| H  | 3.779954  | -5.440550 | -0.543294 |
| H  | 3.044685  | -4.249092 | 0.557101  |
| C  | 6.923206  | -4.241500 | -0.257669 |
| H  | 7.182013  | -4.541491 | 0.770867  |
| H  | 7.744839  | -3.620432 | -0.646973 |
| H  | 6.889004  | -5.161663 | -0.867941 |
| C  | 4.941985  | -2.877267 | -2.122942 |
| H  | 4.965288  | -3.757026 | -2.789158 |
| H  | 5.729455  | -2.183928 | -2.461783 |
| H  | 3.974592  | -2.373969 | -2.259834 |
| C  | 7.476156  | -0.440754 | -0.657980 |
| H  | 7.762242  | -1.336609 | -1.231699 |
| H  | 8.393024  | 0.152290  | -0.492984 |
| H  | 6.806996  | 0.161187  | -1.293739 |
| C  | 7.950936  | -1.861793 | 2.021373  |
| H  | 8.463027  | -2.639156 | 1.436140  |
| H  | 7.474022  | -2.352775 | 2.887067  |
| H  | 8.723307  | -1.178706 | 2.415836  |
| C  | 6.382701  | 0.725516  | 1.942809  |
| H  | 6.072949  | 0.524438  | 2.980611  |
| H  | 5.597796  | 1.331682  | 1.471251  |
| H  | 7.307970  | 1.326991  | 1.979205  |
| C  | -1.249001 | -2.158137 | 4.553310  |
| H  | -1.926061 | -1.298623 | 4.481894  |
| H  | -0.732510 | -2.095192 | 5.521822  |
| H  | -1.873368 | -3.067128 | 4.574486  |
| C  | -0.892568 | -3.327370 | 1.778381  |
| H  | -1.627195 | -4.000670 | 2.248326  |
| H  | -0.190087 | -3.953354 | 1.210883  |
| H  | -1.427272 | -2.683520 | 1.064907  |

|   |           |           |           |
|---|-----------|-----------|-----------|
| C | 1.383003  | -3.367045 | 3.822005  |
| H | 2.007678  | -2.806118 | 4.536296  |
| H | 2.043173  | -3.792439 | 3.050465  |
| H | 0.940285  | -4.214412 | 4.375401  |
| C | 1.172494  | 2.280504  | 3.454462  |
| H | 2.042482  | 2.861797  | 3.801066  |
| H | 0.288628  | 2.675715  | 3.971720  |
| H | 1.050568  | 2.459953  | 2.377108  |
| C | 0.757885  | 0.185392  | 5.610571  |
| H | 1.045610  | -0.798060 | 6.015176  |
| H | -0.329140 | 0.293877  | 5.723133  |
| H | 1.236909  | 0.949637  | 6.249430  |
| C | 3.245419  | 0.104614  | 3.978107  |
| H | 3.788664  | 0.415435  | 3.077348  |
| H | 3.475249  | -0.957178 | 4.156560  |
| H | 3.640639  | 0.677803  | 4.836683  |
| C | 3.778464  | 3.514020  | 1.347679  |
| H | 3.447486  | 2.599403  | 1.856625  |
| H | 3.611673  | 4.365141  | 2.029357  |
| H | 4.865202  | 3.431701  | 1.181483  |
| C | 3.932442  | 5.048667  | -1.240617 |
| H | 3.532559  | 5.307570  | -2.233366 |
| H | 4.970072  | 4.701207  | -1.372592 |
| H | 3.975311  | 5.980826  | -0.649817 |
| C | 1.234716  | 4.621463  | 0.052171  |
| H | 1.436930  | 5.543758  | 0.626584  |
| H | 0.555232  | 4.002249  | 0.655212  |
| H | 0.707538  | 4.923698  | -0.867285 |
| C | 4.933102  | 2.511556  | -3.564481 |
| H | 5.166743  | 3.572774  | -3.386930 |
| H | 5.134495  | 2.305845  | -4.630463 |
| H | 5.638063  | 1.904928  | -2.971140 |
| C | 2.109446  | 3.338581  | -4.184360 |
| H | 1.964622  | 4.288178  | -3.644002 |
| H | 1.110606  | 2.965412  | -4.455099 |

|    |          |           |           |
|----|----------|-----------|-----------|
| H  | 2.651372 | 3.568123  | -5.119621 |
| C  | 2.837474 | 0.335103  | -3.775465 |
| H  | 3.638635 | -0.324306 | -3.406922 |
| H  | 2.840423 | 0.293838  | -4.877680 |
| H  | 1.883361 | -0.080315 | -3.422438 |
| Ga | 0.002393 | 2.289864  | -1.799293 |
| N  | 0.129308 | 1.045943  | -0.271312 |

--

--

Ar\*-Ga≡N-Ar\*

--

| Atomic<br>Number | Coordinates (Angstroms) |          |           |
|------------------|-------------------------|----------|-----------|
|                  | X                       | Y        | Z         |
| C                | 2.969776                | 2.975071 | -0.023550 |
| C                | 4.476986                | 1.293829 | -1.668538 |
| C                | 2.354735                | 2.366760 | -1.157590 |
| C                | 4.338550                | 2.766621 | 0.220511  |
| C                | 5.123154                | 1.958169 | -0.612749 |
| C                | 3.115441                | 1.483956 | -1.975796 |
| H                | 4.803680                | 3.274773 | 1.066558  |
| H                | 5.060571                | 0.621002 | -2.305355 |
| C                | 2.212277                | 3.930870 | 0.897631  |
| H                | 1.144153                | 3.860840 | 0.658188  |
| C                | 2.632340                | 5.392516 | 0.639650  |
| H                | 2.043266                | 6.081953 | 1.267776  |
| H                | 3.699463                | 5.545264 | 0.871219  |
| H                | 2.471672                | 5.663819 | -0.415378 |
| C                | 2.374303                | 3.555459 | 2.383410  |
| H                | 3.421010                | 3.644778 | 2.715878  |
| H                | 2.051895                | 2.519949 | 2.571250  |

|   |           |           |           |
|---|-----------|-----------|-----------|
| H | 1.769145  | 4.226306  | 3.014101  |
| C | 2.616888  | 0.774745  | -3.239767 |
| H | 3.309540  | -0.074561 | -3.376877 |
| C | 2.782414  | 1.691207  | -4.474120 |
| H | 3.806058  | 2.094975  | -4.533986 |
| H | 2.079872  | 2.538518  | -4.429075 |
| H | 2.575234  | 1.128527  | -5.400159 |
| C | 1.201450  | 0.181381  | -3.191011 |
| H | 1.047717  | -0.438731 | -2.294969 |
| H | 1.041607  | -0.462224 | -4.071330 |
| H | 0.431452  | 0.962576  | -3.214218 |
| C | 6.638288  | 1.881241  | -0.479566 |
| H | 6.947284  | 0.882432  | -0.824498 |
| C | 7.283069  | 2.915637  | -1.432511 |
| H | 6.992701  | 3.939132  | -1.140828 |
| H | 6.952670  | 2.755465  | -2.470828 |
| H | 8.383737  | 2.846371  | -1.400176 |
| C | 7.158931  | 2.077403  | 0.954220  |
| H | 7.009585  | 3.114356  | 1.298229  |
| H | 8.241118  | 1.872791  | 0.996898  |
| H | 6.652460  | 1.408353  | 1.666617  |
| C | -5.060847 | 2.042633  | 1.292556  |
| C | -2.653601 | 2.443191  | -0.185187 |
| C | -4.905249 | 1.527196  | -0.003147 |
| C | -3.958494 | 2.694678  | 1.867467  |
| C | -2.762534 | 2.906320  | 1.160752  |
| C | -3.728352 | 1.707477  | -0.758181 |
| H | -5.723840 | 0.974474  | -0.465550 |
| H | -4.051317 | 3.081533  | 2.886276  |
| C | -6.394255 | 2.024940  | 2.033014  |
| H | -6.168653 | 2.098658  | 3.112279  |
| C | -7.237763 | 0.758494  | 1.812052  |
| H | -6.692569 | -0.151228 | 2.104591  |
| H | -7.536983 | 0.654441  | 0.757166  |
| H | -8.162486 | 0.810156  | 2.409642  |

|   |           |           |           |
|---|-----------|-----------|-----------|
| C | -7.200850 | 3.284015  | 1.635882  |
| H | -6.619850 | 4.200875  | 1.823489  |
| H | -8.144773 | 3.343802  | 2.203681  |
| H | -7.446831 | 3.255485  | 0.560914  |
| C | -3.759973 | 1.115940  | -2.169793 |
| H | -4.444029 | 0.256598  | -2.090848 |
| C | -2.440752 | 0.553140  | -2.711931 |
| H | -1.955808 | -0.107518 | -1.979061 |
| H | -1.738593 | 1.346545  | -2.996638 |
| H | -2.647334 | -0.048524 | -3.611058 |
| C | -4.390738 | 2.106987  | -3.173375 |
| H | -5.357478 | 2.485870  | -2.804778 |
| H | -4.560311 | 1.611191  | -4.144207 |
| H | -3.728287 | 2.969361  | -3.347508 |
| C | -1.651875 | 3.710615  | 1.834670  |
| H | -0.748840 | 3.620360  | 1.218581  |
| C | -2.018031 | 5.208599  | 1.879829  |
| H | -2.223913 | 5.589972  | 0.867294  |
| H | -1.192054 | 5.798625  | 2.311817  |
| H | -2.917416 | 5.376308  | 2.495313  |
| C | -1.303277 | 3.173140  | 3.235738  |
| H | -1.007571 | 2.113521  | 3.195954  |
| H | -2.155097 | 3.254715  | 3.929670  |
| H | -0.468235 | 3.746898  | 3.666734  |
| C | -1.459997 | 2.883555  | -0.985978 |
| C | 0.791940  | 3.923083  | -2.348515 |
| C | -0.184975 | 2.273036  | -0.847056 |
| C | -1.587579 | 4.001655  | -1.834999 |
| C | -0.475395 | 4.499104  | -2.533887 |
| C | 0.959091  | 2.818917  | -1.487753 |
| H | -2.561812 | 4.486328  | -1.931725 |
| H | -0.589010 | 5.362892  | -3.195518 |
| H | 1.669486  | 4.348715  | -2.841136 |
| C | 3.167700  | -2.850373 | -0.006291 |
| C | 4.691434  | -1.227493 | 1.678774  |



|   |          |           |           |
|---|----------|-----------|-----------|
| C | 2.566546 | -2.303349 | 1.163552  |
| C | 4.524274 | -2.605760 | -0.276778 |
| C | 5.317919 | -1.816832 | 0.568666  |
| C | 3.337728 | -1.458768 | 2.004855  |
| H | 4.974365 | -3.072755 | -1.154387 |
| H | 5.284107 | -0.590933 | 2.345837  |
| C | 2.402930 | -3.801415 | -0.923386 |
| H | 1.338510 | -3.716596 | -0.679082 |
| C | 2.815258 | -5.262161 | -0.645991 |
| H | 2.225670 | -5.958539 | -1.265856 |
| H | 3.883374 | -5.419772 | -0.872235 |
| H | 2.649583 | -5.517970 | 0.411833  |
| C | 2.562441 | -3.451901 | -2.413450 |
| H | 3.602938 | -3.571456 | -2.757151 |
| H | 2.254968 | -2.415202 | -2.609023 |
| H | 1.936834 | -4.119640 | -3.027743 |
| C | 2.866660 | -0.848427 | 3.330241  |
| H | 3.499244 | 0.045832  | 3.477333  |
| C | 3.176375 | -1.813960 | 4.498999  |
| H | 4.230458 | -2.134076 | 4.473615  |
| H | 2.543616 | -2.712695 | 4.435423  |
| H | 2.981918 | -1.327416 | 5.470333  |
| C | 1.407096 | -0.375598 | 3.406619  |
| H | 1.140217 | 0.239234  | 2.529482  |
| H | 1.258336 | 0.243344  | 4.307143  |
| H | 0.703913 | -1.216349 | 3.452574  |
| C | 6.826295 | -1.693231 | 0.383634  |
| H | 7.122390 | -0.693813 | 0.741008  |
| C | 7.541066 | -2.729073 | 1.282623  |
| H | 7.261702 | -3.752580 | 0.981090  |
| H | 7.253847 | -2.599979 | 2.337887  |
| H | 8.637663 | -2.632053 | 1.203478  |
| C | 7.299381 | -1.840631 | -1.073030 |
| H | 7.181648 | -2.876855 | -1.430273 |
| H | 8.369078 | -1.587090 | -1.155434 |

|   |           |           |           |
|---|-----------|-----------|-----------|
| H | 6.735021  | -1.186183 | -1.755319 |
| C | -4.885461 | -2.353006 | -1.302631 |
| C | -2.436545 | -2.504318 | 0.161478  |
| C | -4.797435 | -1.896762 | 0.020485  |
| C | -3.700655 | -2.797829 | -1.912773 |
| C | -2.482497 | -2.874914 | -1.216586 |
| C | -3.598151 | -1.948854 | 0.763213  |
| H | -5.688074 | -1.499896 | 0.513007  |
| H | -3.742094 | -3.121989 | -2.955800 |
| C | -6.215819 | -2.471585 | -2.038918 |
| H | -5.981980 | -2.650659 | -3.103777 |
| C | -7.098541 | -1.212984 | -1.958074 |
| H | -6.580762 | -0.328108 | -2.358914 |
| H | -7.390612 | -0.996961 | -0.918325 |
| H | -8.026733 | -1.356617 | -2.535992 |
| C | -6.985148 | -3.705498 | -1.514617 |
| H | -6.365108 | -4.613294 | -1.584769 |
| H | -7.913427 | -3.868135 | -2.088784 |
| H | -7.257042 | -3.565666 | -0.454866 |
| C | -3.688560 | -1.404374 | 2.193909  |
| H | -4.495142 | -0.654216 | 2.150265  |
| C | -2.449742 | -0.657969 | 2.709339  |
| H | -2.122487 | 0.096784  | 1.976793  |
| H | -1.612821 | -1.337094 | 2.913085  |
| H | -2.694900 | -0.125024 | 3.642779  |
| C | -4.143671 | -2.485414 | 3.199860  |
| H | -5.028286 | -3.024428 | 2.823375  |
| H | -4.405510 | -2.024347 | 4.167912  |
| H | -3.345267 | -3.219873 | 3.381125  |
| C | -1.250436 | -3.438435 | -1.923260 |
| H | -0.374577 | -2.999094 | -1.433089 |
| C | -1.177993 | -4.970436 | -1.753927 |
| H | -1.173392 | -5.250949 | -0.690646 |
| H | -0.261188 | -5.368640 | -2.219685 |
| H | -2.044677 | -5.454668 | -2.235556 |

|    |           |           |           |
|----|-----------|-----------|-----------|
| C  | -1.156234 | -3.052672 | -3.410399 |
| H  | -1.225022 | -1.964411 | -3.547578 |
| H  | -1.945339 | -3.527428 | -4.016395 |
| H  | -0.188955 | -3.384584 | -3.818630 |
| C  | -1.229397 | -2.890868 | 0.966761  |
| C  | 1.033910  | -3.902126 | 2.321720  |
| C  | 0.031517  | -2.216056 | 0.841696  |
| C  | -1.328116 | -4.025957 | 1.791023  |
| C  | -0.217954 | -4.517142 | 2.498019  |
| C  | 1.181881  | -2.778930 | 1.491574  |
| H  | -2.288476 | -4.543628 | 1.854823  |
| H  | -0.316045 | -5.398079 | 3.138214  |
| H  | 1.922494  | -4.321239 | 2.801729  |
| Ga | -0.029227 | 0.582741  | 0.119367  |
| N  | 0.148692  | -1.110682 | 0.042645  |

-----  
 --  
 -----  
 --  
 Ar\*<sub>2</sub>-Ga=N  
 -----

-----

| Atomic<br>Number | Coordinates (Angstroms) |           |           |
|------------------|-------------------------|-----------|-----------|
|                  | X                       | Y         | Z         |
| Ga               | -0.302833               | -0.808995 | -0.073509 |
| N                | -1.790045               | -2.035424 | 0.038368  |
| H                | 2.863963                | -0.679112 | -4.229975 |
| C                | 1.949722                | -0.262122 | -3.804395 |
| C                | -0.343390               | 0.819684  | -2.642318 |
| C                | 1.688693                | -0.503453 | -2.433880 |
| C                | 1.087391                | 0.487874  | -4.604700 |
| C                | -0.026418               | 1.067283  | -3.997010 |
| C                | 0.456047                | -0.063806 | -1.838279 |

-----

|   |           |           |           |
|---|-----------|-----------|-----------|
| H | 1.300804  | 0.648953  | -5.665113 |
| H | -0.678860 | 1.730653  | -4.566919 |
| C | 2.860339  | -1.199067 | -1.778582 |
| C | 5.261944  | -2.583732 | -1.095020 |
| C | 2.876630  | -2.614873 | -1.680974 |
| C | 4.077564  | -0.475813 | -1.578328 |
| C | 5.244643  | -1.189364 | -1.245029 |
| C | 4.062160  | -3.277700 | -1.312861 |
| H | 6.177514  | -0.640404 | -1.092655 |
| H | 4.059204  | -4.367514 | -1.248898 |
| C | -1.534491 | 1.622257  | -2.183667 |
| C | -3.844886 | 3.227109  | -1.707030 |
| C | -2.839758 | 1.081981  | -2.362016 |
| C | -1.390001 | 3.007082  | -1.865237 |
| C | -2.552051 | 3.759315  | -1.595572 |
| C | -3.964081 | 1.891906  | -2.120301 |
| H | -2.427348 | 4.811899  | -1.325543 |
| H | -4.963767 | 1.471582  | -2.254243 |
| C | 1.691371  | -3.442118 | -2.160914 |
| H | 0.797771  | -2.797811 | -2.177481 |
| C | 1.395334  | -4.638837 | -1.254360 |
| H | 2.238675  | -5.345645 | -1.213868 |
| H | 0.526240  | -5.190047 | -1.635669 |
| H | 1.177207  | -4.310953 | -0.228017 |
| C | 1.945002  | -3.911511 | -3.611626 |
| H | 2.139572  | -3.059460 | -4.280060 |
| H | 1.072878  | -4.464305 | -3.998954 |
| H | 2.821487  | -4.580188 | -3.648572 |
| C | 4.194265  | 1.036443  | -1.786848 |
| H | 3.182019  | 1.455149  | -1.742608 |
| C | 5.034554  | 1.734691  | -0.702123 |
| H | 6.100581  | 1.461656  | -0.774026 |
| H | 4.678943  | 1.489617  | 0.303113  |
| H | 4.971820  | 2.826818  | -0.828635 |
| C | 4.799488  | 1.377619  | -3.168339 |

|   |           |           |           |
|---|-----------|-----------|-----------|
| H | 4.183684  | 1.006988  | -3.997482 |
| H | 5.805934  | 0.936514  | -3.265080 |
| H | 4.896891  | 2.471123  | -3.278706 |
| C | 6.557198  | -3.318627 | -0.773686 |
| H | 7.316088  | -2.552070 | -0.535394 |
| C | 6.418929  | -4.241849 | 0.452859  |
| H | 5.696737  | -5.052755 | 0.262286  |
| H | 6.070433  | -3.681762 | 1.334345  |
| H | 7.387163  | -4.709730 | 0.697629  |
| C | 7.057677  | -4.105853 | -2.004458 |
| H | 7.190174  | -3.438913 | -2.871470 |
| H | 6.334228  | -4.887785 | -2.289373 |
| H | 8.022265  | -4.597175 | -1.791227 |
| C | -3.037033 | -0.306415 | -2.964913 |
| H | -2.114875 | -0.883364 | -2.802789 |
| C | -3.255037 | -0.174250 | -4.490547 |
| H | -4.167619 | 0.410947  | -4.695108 |
| H | -3.374367 | -1.168860 | -4.952194 |
| H | -2.411626 | 0.332975  | -4.981034 |
| C | -4.193331 | -1.091023 | -2.330445 |
| H | -4.092712 | -1.138277 | -1.240029 |
| H | -4.192034 | -2.123779 | -2.711969 |
| H | -5.170614 | -0.647790 | -2.583796 |
| C | -5.087526 | 4.078836  | -1.472743 |
| H | -5.942715 | 3.384092  | -1.395975 |
| C | -5.343308 | 5.004686  | -2.682633 |
| H | -5.411782 | 4.423314  | -3.615832 |
| H | -4.520103 | 5.730028  | -2.796613 |
| H | -6.281331 | 5.571025  | -2.552684 |
| C | -5.024827 | 4.893629  | -0.166515 |
| H | -4.225022 | 5.650896  | -0.202754 |
| H | -4.836381 | 4.244474  | 0.701769  |
| H | -5.975524 | 5.427149  | -0.000235 |
| C | -0.104212 | 3.846845  | -1.953742 |
| H | -0.267467 | 4.689016  | -1.260252 |

|   |           |           |           |
|---|-----------|-----------|-----------|
| C | 0.013848  | 4.494759  | -3.356149 |
| H | 0.825788  | 5.242195  | -3.359573 |
| H | -0.922679 | 4.999327  | -3.641171 |
| H | 0.247705  | 3.742926  | -4.123874 |
| C | 1.228477  | 3.199104  | -1.558063 |
| H | 1.990943  | 3.985758  | -1.436659 |
| H | 1.579035  | 2.512576  | -2.336603 |
| H | 1.164700  | 2.646943  | -0.611278 |
| H | 1.100760  | 0.384036  | 4.946365  |
| C | 0.450295  | -0.142029 | 4.243928  |
| C | -1.250301 | -1.381729 | 2.440034  |
| C | 0.579184  | 0.146108  | 2.864034  |
| C | -0.521745 | -1.029230 | 4.723653  |
| C | -1.419790 | -1.606100 | 3.815288  |
| C | -0.227345 | -0.541332 | 1.923134  |
| H | -0.607389 | -1.227313 | 5.795870  |
| H | -2.263001 | -2.204528 | 4.167766  |
| C | 1.512426  | 1.259162  | 2.518967  |
| C | 3.287399  | 3.436443  | 2.162024  |
| C | 0.988718  | 2.557935  | 2.245887  |
| C | 2.907852  | 1.060531  | 2.654107  |
| C | 3.771399  | 2.157046  | 2.471051  |
| C | 1.894655  | 3.616325  | 2.062777  |
| H | 4.850615  | 2.013217  | 2.578621  |
| H | 1.506655  | 4.613514  | 1.852981  |
| C | -2.287698 | -1.846570 | 1.455536  |
| C | -4.785171 | -3.130091 | 0.717183  |
| C | -2.281280 | -3.243219 | 0.901182  |
| C | -3.612899 | -1.152423 | 1.635894  |
| C | -4.758607 | -1.770462 | 1.234768  |
| C | -3.613038 | -3.810355 | 0.558373  |
| H | -5.709517 | -1.241556 | 1.341187  |
| H | -3.657849 | -4.860668 | 0.258595  |
| C | -0.523161 | 2.821849  | 2.251396  |
| H | -1.004939 | 1.997091  | 1.703673  |

|   |           |           |           |
|---|-----------|-----------|-----------|
| C | -0.940570 | 4.136224  | 1.574395  |
| H | -0.658476 | 5.009837  | 2.185736  |
| H | -2.033378 | 4.158116  | 1.449484  |
| H | -0.489769 | 4.251427  | 0.583807  |
| C | -1.084590 | 2.823535  | 3.692415  |
| H | -0.951656 | 1.857549  | 4.192757  |
| H | -2.162371 | 3.056582  | 3.676946  |
| H | -0.575999 | 3.596585  | 4.292768  |
| C | 3.477298  | -0.296447 | 3.064797  |
| H | 2.632526  | -0.992210 | 3.167283  |
| C | 4.416602  | -0.894924 | 2.007327  |
| H | 5.299344  | -0.259289 | 1.832495  |
| H | 3.903031  | -1.021183 | 1.046057  |
| H | 4.777575  | -1.883937 | 2.333681  |
| C | 4.166586  | -0.203659 | 4.441208  |
| H | 3.487901  | 0.219586  | 5.198621  |
| H | 5.059970  | 0.440846  | 4.396400  |
| H | 4.486217  | -1.202896 | 4.781658  |
| C | 4.248583  | 4.608960  | 2.014916  |
| H | 5.264408  | 4.184661  | 1.924975  |
| C | 3.979566  | 5.454443  | 0.755543  |
| H | 2.992450  | 5.942501  | 0.801589  |
| H | 4.004275  | 4.834305  | -0.153346 |
| H | 4.737583  | 6.249163  | 0.655208  |
| C | 4.214594  | 5.485347  | 3.286170  |
| H | 4.961644  | 6.295165  | 3.230303  |
| H | 4.420031  | 4.880356  | 4.183818  |
| H | 3.220057  | 5.945326  | 3.411827  |
| C | -1.279820 | -4.302513 | 1.407363  |
| H | -0.292097 | -3.818445 | 1.466949  |
| C | -1.209174 | -5.518767 | 0.460639  |
| H | -2.051231 | -6.205052 | 0.646737  |
| H | -0.285741 | -6.090867 | 0.638116  |
| H | -1.242236 | -5.221798 | -0.594853 |
| C | -1.642735 | -4.841389 | 2.813172  |

|   |           |           |           |
|---|-----------|-----------|-----------|
| H | -1.574412 | -4.077885 | 3.596817  |
| H | -0.951319 | -5.659586 | 3.082588  |
| H | -2.664550 | -5.257813 | 2.822380  |
| C | -6.128718 | -3.773049 | 0.391938  |
| H | -5.935852 | -4.839512 | 0.178586  |
| C | -6.744132 | -3.142575 | -0.875427 |
| H | -6.068896 | -3.254652 | -1.735957 |
| H | -6.926086 | -2.065105 | -0.730852 |
| H | -7.708439 | -3.619843 | -1.119563 |
| C | -7.127443 | -3.704800 | 1.568258  |
| H | -6.710271 | -4.158456 | 2.481821  |
| H | -8.056612 | -4.240470 | 1.308658  |
| H | -7.405617 | -2.664534 | 1.803827  |
| C | -3.643879 | 0.248905  | 2.237356  |
| H | -2.640324 | 0.477755  | 2.615875  |
| C | -4.609090 | 0.357327  | 3.431354  |
| H | -4.361720 | -0.389177 | 4.202616  |
| H | -5.654351 | 0.192521  | 3.123214  |
| H | -4.544247 | 1.359901  | 3.886138  |
| C | -3.954877 | 1.290892  | 1.151125  |
| H | -3.925274 | 2.308969  | 1.570054  |
| H | -4.951214 | 1.127482  | 0.710617  |
| H | -3.225828 | 1.239860  | 0.332629  |

-----  
 --

-----  
 --

Ga=N-Ar\*<sub>2</sub>

-----  
 --

| Atomic<br>Number | Coordinates (Angstroms) |   |   |
|------------------|-------------------------|---|---|
|                  | X                       | Y | Z |

-----  
 --

|   |          |           |          |
|---|----------|-----------|----------|
| C | 2.932266 | -2.513298 | 0.698902 |
|---|----------|-----------|----------|



|   |          |           |           |
|---|----------|-----------|-----------|
| C | 4.552155 | -0.461036 | 1.690948  |
| C | 2.331888 | -1.385493 | 1.341759  |
| C | 4.329157 | -2.549681 | 0.534937  |
| C | 5.161334 | -1.530650 | 1.023143  |
| C | 3.160942 | -0.376025 | 1.886114  |
| H | 4.779806 | -3.424562 | 0.061869  |
| H | 5.182836 | 0.324297  | 2.116740  |
| C | 2.141848 | -3.795923 | 0.394158  |
| H | 1.067831 | -3.556671 | 0.418392  |
| C | 2.399767 | -4.836054 | 1.510329  |
| H | 1.774462 | -5.731375 | 1.355677  |
| H | 3.456988 | -5.149659 | 1.501636  |
| H | 2.177046 | -4.426612 | 2.504599  |
| C | 2.452790 | -4.447267 | -0.966636 |
| H | 3.505422 | -4.764206 | -1.036775 |
| H | 2.251004 | -3.771600 | -1.810348 |
| H | 1.828445 | -5.346124 | -1.099675 |
| C | 2.703199 | 0.715747  | 2.854623  |
| H | 3.367645 | 1.570664  | 2.646794  |
| C | 2.992399 | 0.272200  | 4.309905  |
| H | 4.039756 | -0.044760 | 4.432608  |
| H | 2.345306 | -0.571760 | 4.595914  |
| H | 2.794525 | 1.101059  | 5.011074  |
| C | 1.258674 | 1.217267  | 2.741976  |
| H | 0.978992 | 1.411357  | 1.699841  |
| H | 1.152372 | 2.153533  | 3.309370  |
| H | 0.540027 | 0.503005  | 3.158984  |
| C | 6.680858 | -1.631443 | 0.977752  |
| H | 7.074906 | -0.610876 | 1.114284  |
| C | 7.184972 | -2.483430 | 2.165092  |
| H | 6.810825 | -3.517852 | 2.083755  |
| H | 6.829233 | -2.072641 | 3.123445  |
| H | 8.287794 | -2.518083 | 2.186579  |
| C | 7.229433 | -2.176498 | -0.352064 |
| H | 6.955044 | -3.234137 | -0.497689 |

|   |           |           |           |
|---|-----------|-----------|-----------|
| H | 8.330458  | -2.118745 | -0.365003 |
| H | 6.840318  | -1.607162 | -1.208651 |
| C | -5.388250 | -2.145471 | -0.664073 |
| C | -2.809210 | -1.726980 | 0.493949  |
| C | -5.202383 | -1.272408 | 0.414793  |
| C | -4.268698 | -2.860798 | -1.116055 |
| C | -2.996170 | -2.688118 | -0.545955 |
| C | -3.949775 | -1.074374 | 1.033635  |
| H | -6.062264 | -0.735729 | 0.820794  |
| H | -4.406438 | -3.600764 | -1.908677 |
| C | -6.767013 | -2.415619 | -1.255312 |
| H | -6.613703 | -2.993643 | -2.184208 |
| C | -7.531960 | -1.130850 | -1.622792 |
| H | -6.954844 | -0.505491 | -2.321695 |
| H | -7.749478 | -0.527433 | -0.727152 |
| H | -8.496657 | -1.377874 | -2.096305 |
| C | -7.596665 | -3.292143 | -0.290667 |
| H | -7.062869 | -4.225428 | -0.049697 |
| H | -8.573167 | -3.552411 | -0.733615 |
| H | -7.782525 | -2.758070 | 0.656045  |
| C | -4.023365 | -0.243767 | 2.324983  |
| H | -4.641312 | 0.625348  | 2.055396  |
| C | -2.743707 | 0.322563  | 2.957640  |
| H | -2.041232 | 0.698648  | 2.208743  |
| H | -2.221387 | -0.417332 | 3.576885  |
| H | -3.029091 | 1.164516  | 3.607658  |
| C | -4.805479 | -1.035639 | 3.403600  |
| H | -5.790136 | -1.367126 | 3.041167  |
| H | -4.959257 | -0.408026 | 4.297887  |
| H | -4.243872 | -1.930982 | 3.716183  |
| C | -1.907831 | -3.694831 | -0.918564 |
| H | -0.935023 | -3.277507 | -0.606837 |
| C | -2.107701 | -4.994740 | -0.103601 |
| H | -2.114476 | -4.792672 | 0.977142  |
| H | -1.302017 | -5.717170 | -0.318691 |

|   |           |           |           |
|---|-----------|-----------|-----------|
| H | -3.070745 | -5.463019 | -0.370253 |
| C | -1.832037 | -4.028024 | -2.419364 |
| H | -1.773511 | -3.121887 | -3.040600 |
| H | -2.709816 | -4.607698 | -2.747100 |
| H | -0.938736 | -4.640298 | -2.624221 |
| C | -1.501695 | -1.713800 | 1.243372  |
| C | 0.702814  | -2.238943 | 2.899332  |
| C | -0.241061 | -1.097983 | 0.898827  |
| C | -1.605500 | -2.524261 | 2.399341  |
| C | -0.541468 | -2.745772 | 3.270275  |
| C | 0.879688  | -1.503795 | 1.709873  |
| H | -2.576828 | -2.975388 | 2.606143  |
| H | -0.665564 | -3.346289 | 4.175190  |
| H | 1.589026  | -2.465617 | 3.494391  |
| C | 3.137932  | 2.420734  | -0.239295 |
| C | 5.012792  | 0.792036  | -1.522216 |
| C | 2.669798  | 1.386298  | -1.117499 |
| C | 4.514563  | 2.536641  | 0.032390  |
| C | 5.473788  | 1.719399  | -0.581508 |
| C | 3.649702  | 0.637386  | -1.832158 |
| H | 4.845960  | 3.332925  | 0.700413  |
| H | 5.748086  | 0.205887  | -2.079478 |
| C | 2.246256  | 3.587271  | 0.203974  |
| H | 1.202736  | 3.254004  | 0.190012  |
| C | 2.386155  | 4.741698  | -0.821033 |
| H | 1.710883  | 5.572386  | -0.557786 |
| H | 3.420491  | 5.124959  | -0.815750 |
| H | 2.147467  | 4.419071  | -1.841433 |
| C | 2.557199  | 4.167417  | 1.596797  |
| H | 3.520586  | 4.702478  | 1.602794  |
| H | 2.590949  | 3.402923  | 2.379388  |
| H | 1.783758  | 4.901644  | 1.871657  |
| C | 3.331342  | -0.194619 | -3.070365 |
| H | 2.234928  | -0.264019 | -3.159334 |
| C | 3.906242  | -1.619864 | -3.005803 |

|   |           |           |           |
|---|-----------|-----------|-----------|
| H | 3.696934  | -2.088479 | -2.036568 |
| H | 4.999787  | -1.612190 | -3.137073 |
| H | 3.479675  | -2.247222 | -3.805792 |
| C | 3.816802  | 0.518540  | -4.352205 |
| H | 3.397866  | 1.532043  | -4.439911 |
| H | 3.518260  | -0.055562 | -5.245621 |
| H | 4.915491  | 0.608340  | -4.355833 |
| C | 6.974798  | 1.912620  | -0.393701 |
| H | 7.448321  | 0.929130  | -0.559380 |
| C | 7.515094  | 2.872251  | -1.479099 |
| H | 7.064436  | 3.872400  | -1.364241 |
| H | 7.266731  | 2.506392  | -2.487893 |
| H | 8.611068  | 2.977093  | -1.404881 |
| C | 7.380155  | 2.402616  | 1.006291  |
| H | 7.035149  | 3.433487  | 1.187854  |
| H | 8.477943  | 2.402868  | 1.106853  |
| H | 6.963678  | 1.763011  | 1.799515  |
| C | -5.054182 | 2.658032  | 0.648734  |
| C | -2.508169 | 1.832007  | -0.352486 |
| C | -4.944648 | 1.816021  | -0.466073 |
| C | -3.863963 | 3.093886  | 1.250829  |
| C | -2.601365 | 2.714363  | 0.767422  |
| C | -3.703290 | 1.413314  | -0.999733 |
| H | -5.852625 | 1.472429  | -0.967114 |
| H | -3.927163 | 3.780115  | 2.099042  |
| C | -6.404545 | 3.155445  | 1.150362  |
| H | -6.216377 | 3.712240  | 2.085630  |
| C | -7.379734 | 2.008227  | 1.476408  |
| H | -6.948274 | 1.313302  | 2.213652  |
| H | -7.629615 | 1.431092  | 0.571741  |
| H | -8.323012 | 2.405671  | 1.886876  |
| C | -7.030994 | 4.138819  | 0.137940  |
| H | -6.341623 | 4.969890  | -0.080935 |
| H | -7.972888 | 4.560088  | 0.528842  |
| H | -7.256053 | 3.628941  | -0.813667 |

|    |           |           |           |
|----|-----------|-----------|-----------|
| C  | -3.813466 | 0.621101  | -2.312171 |
| H  | -4.608649 | -0.116441 | -2.118707 |
| C  | -2.597668 | -0.181926 | -2.794765 |
| H  | -2.129173 | -0.715280 | -1.959660 |
| H  | -1.844959 | 0.453689  | -3.280496 |
| H  | -2.932450 | -0.933705 | -3.528280 |
| C  | -4.317318 | 1.532323  | -3.458392 |
| H  | -5.227612 | 2.083100  | -3.175831 |
| H  | -4.544537 | 0.927451  | -4.352757 |
| H  | -3.548755 | 2.269092  | -3.739882 |
| C  | -1.368493 | 3.427404  | 1.323284  |
| H  | -0.491619 | 2.823768  | 1.060018  |
| C  | -1.226580 | 4.802356  | 0.631153  |
| H  | -1.141757 | 4.698612  | -0.459165 |
| H  | -0.332574 | 5.330501  | 0.999133  |
| H  | -2.107244 | 5.429032  | 0.849152  |
| C  | -1.355263 | 3.621000  | 2.849870  |
| H  | -1.430966 | 2.667290  | 3.386047  |
| H  | -2.177003 | 4.272586  | 3.188144  |
| H  | -0.412732 | 4.106097  | 3.149536  |
| C  | -1.185432 | 1.773087  | -1.077756 |
| C  | 1.076693  | 2.316786  | -2.655721 |
| C  | 0.003074  | 0.977954  | -0.838878 |
| C  | -1.200387 | 2.725673  | -2.123002 |
| C  | -0.127477 | 2.930285  | -2.990528 |
| C  | 1.205989  | 1.452253  | -1.542324 |
| H  | -2.126286 | 3.284104  | -2.269775 |
| H  | -0.205387 | 3.612063  | -3.841075 |
| H  | 1.985009  | 2.570109  | -3.204384 |
| Ga | 0.496780  | -1.551550 | -1.875464 |
| N  | 0.045733  | -0.374011 | -0.325673 |

-----

--

-----

--

M062X/ Def2-TZVP

-----  
--  
-----  
--  
F-Ga≡N-F

-----

| Atomic<br>Number | Coordinates (Angstroms) |           |           |
|------------------|-------------------------|-----------|-----------|
|                  | X                       | Y         | Z         |
| Ga               | 0.356919                | -0.016013 | -0.000118 |
| N                | -1.315858               | 0.638496  | 0.000214  |
| F                | -2.293358               | -0.364011 | 0.000089  |
| F                | 2.087417                | -0.077443 | 0.000152  |

-----

-----  
--  
-----  
--  
F2-Ga=N

-----

| Atomic<br>Number | Coordinates (Angstroms) |           |           |
|------------------|-------------------------|-----------|-----------|
|                  | X                       | Y         | Z         |
| Ga               | 0.001715                | -0.053403 | 0.000001  |
| N                | 0.071277                | -1.935250 | -0.000002 |
| F                | 1.454796                | 0.898226  | -0.000001 |
| F                | -1.516142               | 0.790912  | -0.000001 |

-----

-----  
--  
-----  
--

Ga=N-F2

---

--

| Atomic<br>Number | Coordinates (Angstroms) |           |           |
|------------------|-------------------------|-----------|-----------|
|                  | X                       | Y         | Z         |
| Ga               | 0.961357                | -0.000166 | 0.017899  |
| N                | -0.997544               | 0.000071  | -0.653944 |
| F                | -1.268310               | -1.096602 | 0.223517  |
| F                | -1.267163               | 1.097118  | 0.223455  |

---

--

---

--

F-Ga≡N-F-TS1

---

--

| Atomic<br>Number | Coordinates (Angstroms) |           |           |
|------------------|-------------------------|-----------|-----------|
|                  | X                       | Y         | Z         |
| Ga               | -0.000000               | -0.241824 | 0.000000  |
| N                | 1.695850                | 0.370662  | -0.000000 |
| F                | 0.203923                | 1.580902  | -0.000000 |
| F                | -1.522917               | -1.036246 | 0.000000  |

---

--

---

--

F-Ga≡N-F-TS2

---

--

| Atomic<br>Number | Coordinates (Angstroms) |   |   |
|------------------|-------------------------|---|---|
|                  | X                       | Y | Z |

--

|    |           |           |           |
|----|-----------|-----------|-----------|
| Ga | -0.902394 | -0.202554 | 0.000002  |
| N  | 0.877578  | -0.419094 | -0.000019 |
| F  | 0.259993  | 1.343567  | -0.000001 |
| F  | 2.165693  | -0.319920 | 0.000009  |

--

HO-Ga≡N-OH

--

| Atomic<br>Number | Coordinates (Angstroms) |   |   |
|------------------|-------------------------|---|---|
|                  | X                       | Y | Z |

--

|    |           |           |           |
|----|-----------|-----------|-----------|
| Ga | -0.381877 | 0.188669  | 0.024240  |
| N  | 1.259639  | -0.521902 | 0.213046  |
| O  | 2.424900  | 0.019424  | -0.252404 |
| H  | 2.941395  | 0.241002  | 0.534395  |
| O  | -2.117800 | -0.198497 | -0.033195 |
| H  | -2.377494 | -1.003857 | -0.492369 |

--

(OH)<sub>2</sub>-Ga≡N

--

| Atomic<br>Number | Coordinates (Angstroms) |   |   |
|------------------|-------------------------|---|---|
|                  | X                       | Y | Z |

--

|    |          |           |           |
|----|----------|-----------|-----------|
| Ga | 0.219669 | -0.253701 | -0.008293 |
|----|----------|-----------|-----------|



|   |           |           |           |
|---|-----------|-----------|-----------|
| N | -1.510682 | -0.678516 | 0.023543  |
| O | 1.881078  | 0.330721  | -0.019148 |
| H | 2.008217  | 1.261347  | 0.186805  |
| O | -1.430719 | 0.937954  | 0.098341  |
| H | -1.846044 | 1.203588  | -0.728059 |

-----  
--

-----  
--

Ga≡N-(OH)<sub>2</sub>

-----  
--

| Atomic<br>Number | Coordinates (Angstroms) |   |   |
|------------------|-------------------------|---|---|
|                  | X                       | Y | Z |

-----  
--

|    |           |           |           |
|----|-----------|-----------|-----------|
| Ga | -1.124427 | 0.000000  | 0.000000  |
| N  | 0.792107  | 0.000000  | -0.000000 |
| O  | 1.587478  | -1.138331 | -0.109446 |
| H  | 1.956415  | -1.291475 | 0.771744  |
| O  | 1.587478  | 1.138331  | 0.109446  |
| H  | 1.956415  | 1.291475  | -0.771744 |

-----  
--

-----  
--

HO-Ga≡N-OH-TS1

-----  
--

| Atomic<br>Number | Coordinates (Angstroms) |   |   |
|------------------|-------------------------|---|---|
|                  | X                       | Y | Z |

-----  
--

-----  
--

|    |           |           |           |
|----|-----------|-----------|-----------|
| Ga | -0.296879 | -0.229958 | 0.029269  |
| N  | 1.431946  | -0.659335 | -0.108735 |
| O  | -1.922497 | 0.454148  | 0.057523  |
| H  | -2.239987 | 0.900394  | -0.732702 |
| O  | 1.810351  | 0.792526  | -0.076536 |
| H  | 2.316786  | 0.870263  | 0.738608  |

--

HO-Ga≡N-OH-TS2

--

| Atomic<br>Number | Coordinates (Angstroms) |   |   |
|------------------|-------------------------|---|---|
|                  | X                       | Y | Z |

--

|    |           |           |           |
|----|-----------|-----------|-----------|
| Ga | 0.758924  | -0.439325 | -0.008754 |
| N  | -1.434068 | 0.129139  | 0.577140  |
| O  | -2.222004 | -0.092319 | -0.360631 |
| H  | -3.139219 | 0.195166  | -0.133647 |
| O  | 0.891874  | 1.402820  | -0.127452 |
| H  | 0.292099  | 2.035923  | 0.269720  |

--

H-Ga≡N-H

--

| Atomic<br>Number | Coordinates (Angstroms) |   |   |
|------------------|-------------------------|---|---|
|                  | X                       | Y | Z |

--

|    |           |           |           |
|----|-----------|-----------|-----------|
| Ga | -0.316923 | -0.022794 | -0.000005 |
|----|-----------|-----------|-----------|

|   |           |           |          |
|---|-----------|-----------|----------|
| N | 1.371301  | 0.150235  | 0.000002 |
| H | 2.058992  | -0.590537 | 0.000049 |
| H | -1.833499 | 0.245517  | 0.000094 |

-----  
 --  
 -----  
 --

H2-Ga≡N

-----  
 --

| Atomic<br>Number | Coordinates (Angstroms) |   |   |
|------------------|-------------------------|---|---|
|                  | X                       | Y | Z |

-----  
 --

|    |           |           |          |
|----|-----------|-----------|----------|
| Ga | 0.002564  | -0.291483 | 0.000000 |
| N  | 0.002564  | 1.567486  | 0.000000 |
| H  | -1.460090 | -0.869606 | 0.000000 |
| H  | 1.362665  | -1.066819 | 0.000000 |

-----  
 --

-----  
 --

Ga≡N-H2

-----  
 --

| Atomic<br>Number | Coordinates (Angstroms) |   |   |
|------------------|-------------------------|---|---|
|                  | X                       | Y | Z |

-----  
 --

|    |           |           |           |
|----|-----------|-----------|-----------|
| Ga | -0.000000 | 0.451095  | 0.000000  |
| N  | -0.000000 | -1.423971 | 0.000000  |
| H  | 0.825695  | -2.008074 | -0.000000 |
| H  | -0.825686 | -2.008089 | 0.000000  |

-----  
 --

-----  
--  
H-Ga≡N-H-TS1  
-----

-----

| Atomic<br>Number | Coordinates (Angstroms) |           |           |
|------------------|-------------------------|-----------|-----------|
|                  | X                       | Y         | Z         |
| Ga               | 0.291601                | 0.003161  | -0.000247 |
| N                | -1.541625               | -0.087872 | 0.000294  |
| H                | 0.340296                | 1.593341  | 0.002334  |
| H                | 1.411451                | -1.076232 | 0.003265  |

-----

-----  
--  
H-Ga≡N-H-TS2  
-----

-----

| Atomic<br>Number | Coordinates (Angstroms) |           |           |
|------------------|-------------------------|-----------|-----------|
|                  | X                       | Y         | Z         |
| Ga               | -0.386689               | -0.040131 | -0.000222 |
| N                | 1.364660                | -0.005363 | 0.003533  |
| H                | 2.354916                | -0.233901 | -0.015378 |
| H                | 0.079831                | 1.515486  | -0.002468 |

-----

-----  
--  
3HC-Ga≡N-CH3  
-----

| Atomic<br>Number | Coordinates (Angstroms) |           |           |
|------------------|-------------------------|-----------|-----------|
|                  | X                       | Y         | Z         |
| -----            |                         |           |           |
| --               |                         |           |           |
| Ga               | -0.377367               | -0.075848 | -0.002518 |
| N                | 1.255788                | 0.320341  | -0.004049 |
| C                | -2.318127               | 0.081556  | 0.005563  |
| H                | -2.591470               | 1.135572  | -0.012849 |
| H                | -2.731903               | -0.374106 | 0.902793  |
| H                | -2.743468               | -0.407505 | -0.868210 |
| C                | 2.632090                | -0.052026 | 0.004883  |
| H                | 2.924090                | -0.580555 | 0.919053  |
| H                | 3.256097                | 0.846284  | -0.054164 |
| H                | 2.910738                | -0.687965 | -0.842907 |

--

--

(CH3)2-Ga≡N

| Atomic<br>Number | Coordinates (Angstroms) |           |           |
|------------------|-------------------------|-----------|-----------|
|                  | X                       | Y         | Z         |
| -----            |                         |           |           |
| --               |                         |           |           |
| N                | 0.151642                | 1.923939  | -0.000431 |
| Ga               | -0.008184               | 0.061142  | 0.000311  |
| C                | -1.832709               | -0.718976 | 0.000538  |
| H                | -1.997024               | -1.260746 | -0.931159 |
| H                | -2.596497               | 0.049310  | 0.097193  |
| H                | -1.934668               | -1.424913 | 0.824518  |
| C                | 1.748075                | -0.872226 | -0.001179 |
| H                | 2.572735                | -0.172826 | -0.118742 |
| H                | 1.780346                | -1.597684 | -0.813788 |
| H                | 1.875138                | -1.408888 | 0.939193  |

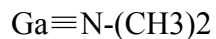

| Atomic<br>Number | Coordinates (Angstroms) |           |           |
|------------------|-------------------------|-----------|-----------|
|                  | X                       | Y         | Z         |
| H                | 0.927101                | 2.092001  | 0.000463  |
| C                | 1.563708                | 1.201846  | 0.000000  |
| H                | 2.211931                | 1.259942  | -0.884762 |
| H                | 2.212943                | 1.259650  | 0.884035  |
| N                | 0.762602                | -0.000024 | 0.000092  |
| Ga               | -1.122864               | -0.000030 | -0.000004 |
| C                | 1.563925                | -1.201741 | -0.000018 |
| H                | 2.211556                | -1.260403 | 0.885143  |
| H                | 0.927467                | -2.092000 | -0.001633 |
| H                | 2.213766                | -1.258738 | -0.883658 |

-----  
--  
-----  
--

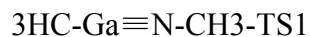

| Atomic<br>Number | Coordinates (Angstroms) |           |           |
|------------------|-------------------------|-----------|-----------|
|                  | X                       | Y         | Z         |
| N                | -0.688303               | 1.775688  | -0.004077 |
| Ga               | 0.046145                | 0.066782  | 0.003147  |
| C                | -1.604143               | -1.068295 | -0.002540 |

-----  
--

|   |           |           |           |
|---|-----------|-----------|-----------|
| H | -1.607480 | -1.692983 | -0.895830 |
| H | -2.503923 | -0.464543 | 0.015521  |
| H | -1.589176 | -1.721068 | 0.870503  |
| C | 1.956446  | -0.435284 | -0.000360 |
| H | 2.559859  | 0.310306  | 0.513783  |
| H | 2.307566  | -0.507121 | -1.030445 |
| H | 2.106954  | -1.403164 | 0.474838  |

-----  
--

-----  
--

3HC-Ga≡N-CH3-TS2

-----  
--

| Atomic<br>Number | Coordinates (Angstroms) |   |   |
|------------------|-------------------------|---|---|
|                  | X                       | Y | Z |

-----  
--

|    |           |           |           |
|----|-----------|-----------|-----------|
| Ga | 0.798519  | -0.458663 | -0.000576 |
| N  | -0.967056 | -0.211016 | 0.015642  |
| C  | 0.500194  | 1.708909  | 0.001179  |
| H  | 1.458312  | 2.055304  | 0.377294  |
| H  | -0.316820 | 2.048672  | 0.622872  |
| H  | 0.362949  | 1.963239  | -1.043892 |
| C  | -2.367250 | -0.096935 | -0.009557 |
| H  | -2.855615 | -0.637436 | 0.810904  |
| H  | -2.828766 | -0.374204 | -0.964607 |
| H  | -2.602417 | 0.968243  | 0.156062  |

-----  
--

-----  
--

3HSi-Ga≡N-SiH3

-----  
--

| Atomic<br>Number | Coordinates (Angstroms) |           |           |
|------------------|-------------------------|-----------|-----------|
|                  | X                       | Y         | Z         |
| -----            |                         |           |           |
| --               |                         |           |           |
| Ga               | -0.399804               | -0.005365 | -0.002158 |
| N                | 1.281097                | -0.014822 | 0.008162  |
| Si               | -2.779921               | 0.006845  | 0.001295  |
| Si               | 2.964643                | 0.007131  | -0.000575 |
| H                | -3.250410               | -1.279017 | 0.545347  |
| H                | -3.246177               | 0.184127  | -1.385863 |
| H                | -3.233040               | 1.125749  | 0.846832  |
| H                | 3.517733                | 0.088612  | -1.377141 |
| H                | 3.541123                | -1.212755 | 0.621099  |
| H                | 3.510897                | 1.167688  | 0.749392  |

-----  
--  
-----  
--  
(SiH3)2-Ga≡N

| Atomic<br>Number | Coordinates (Angstroms) |           |           |
|------------------|-------------------------|-----------|-----------|
|                  | X                       | Y         | Z         |
| -----            |                         |           |           |
| --               |                         |           |           |
| N                | -0.020482               | 2.191833  | 0.000243  |
| Ga               | 0.001008                | 0.375502  | -0.000149 |
| Si               | -2.152999               | -0.752852 | 0.000065  |
| H                | -3.296822               | 0.178586  | 0.001975  |
| H                | -2.207773               | -1.611223 | 1.202893  |
| H                | -2.209818               | -1.608843 | -1.204302 |
| Si               | 2.159165                | -0.742842 | 0.000080  |
| H                | 2.222160                | -1.599040 | -1.203853 |
| H                | 3.296659                | 0.196705  | 0.000704  |
| H                | 2.221387                | -1.599872 | 1.203456  |



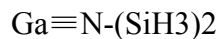

| Atomic<br>Number | Coordinates (Angstroms) |           |           |
|------------------|-------------------------|-----------|-----------|
|                  | X                       | Y         | Z         |
| H                | 0.205406                | -2.577605 | 0.122499  |
| Si               | 1.241238                | -1.517171 | 0.000414  |
| H                | 2.185234                | -1.654091 | 1.133250  |
| H                | 1.997600                | -1.760297 | -1.249362 |
| N                | 0.430161                | -0.000048 | 0.000403  |
| Ga               | -1.503914               | 0.001411  | -0.000023 |
| Si               | 1.245614                | 1.514741  | -0.000486 |
| H                | 2.197134                | 1.643899  | -1.127964 |
| H                | 0.213933                | 2.578075  | -0.132578 |
| H                | 1.994959                | 1.760622  | 1.253054  |

-----  
--  
-----  
--

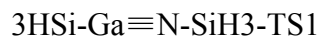

| Atomic<br>Number | Coordinates (Angstroms) |           |           |
|------------------|-------------------------|-----------|-----------|
|                  | X                       | Y         | Z         |
| Ga               | -0.014844               | -0.333520 | -0.003150 |
| N                | 0.183835                | -2.139722 | 0.004577  |
| Si               | -2.226363               | 0.663937  | 0.001506  |

-----  
--

|    |           |           |           |
|----|-----------|-----------|-----------|
| H  | -2.419738 | 1.385984  | 1.277225  |
| H  | -3.266423 | -0.374427 | -0.141066 |
| H  | -2.335974 | 1.628013  | -1.112519 |
| Si | 2.180646  | 0.744267  | 0.001052  |
| H  | 2.188057  | 1.770609  | 1.067981  |
| H  | 2.371955  | 1.408674  | -1.305503 |
| H  | 3.275498  | -0.216537 | 0.243692  |

--

--

3HSi-Ga≡N-SiH3-TS2

--

| Atomic<br>Number | Coordinates (Angstroms) |   |   |
|------------------|-------------------------|---|---|
|                  | X                       | Y | Z |

--

|    |           |           |           |
|----|-----------|-----------|-----------|
| Ga | 0.701974  | -0.974637 | 0.003938  |
| N  | -0.817065 | -0.120632 | -0.003726 |
| Si | 1.565970  | 1.337900  | -0.000425 |
| H  | 1.330768  | 1.783710  | -1.384275 |
| H  | 3.016695  | 1.364710  | 0.298998  |
| H  | 0.863404  | 2.146165  | 1.007267  |
| Si | -2.450111 | 0.380559  | 0.001369  |
| H  | -3.247069 | -0.293914 | -1.056944 |
| H  | -2.477234 | 1.844245  | -0.268521 |
| H  | -3.150327 | 0.154845  | 1.294274  |

--

B3pw91/ Def2-TZVP

--

-----  
--  
F-Ga≡N-F  
-----

-----

| Atomic<br>Number | Coordinates (Angstroms) |           |           |           |
|------------------|-------------------------|-----------|-----------|-----------|
|                  | X                       | Y         | Z         |           |
| Ga               | 0                       | 0.359380  | -0.037757 | -0.000062 |
| N                | 0                       | -1.304386 | 0.630879  | 0.000154  |
| F                | 0                       | -2.317048 | -0.326890 | 0.000031  |
| F                | 0                       | 2.093707  | -0.033740 | 0.000063  |

-----

-----  
--  
F2-Ga=N  
-----

-----

| Atomic<br>Number | Coordinates (Angstroms) |           |           |           |
|------------------|-------------------------|-----------|-----------|-----------|
|                  | X                       | Y         | Z         |           |
| Ga               | 0                       | -0.000948 | -0.057235 | -0.000005 |
| N                | 0                       | -0.036455 | -1.926174 | 0.000008  |
| F                | 0                       | 1.501486  | 0.820177  | 0.000006  |
| F                | 0                       | -1.469869 | 0.875102  | 0.000006  |

-----

-----  
--  
Ga=N-F2  
-----

| Atomic<br>Number | Coordinates (Angstroms) |           |           |
|------------------|-------------------------|-----------|-----------|
|                  | X                       | Y         | Z         |
| -----            |                         |           |           |
| --               |                         |           |           |
| Ga               | 1.142032                | 0.000106  | 0.000224  |
| N                | -0.814685               | 0.000144  | -0.002122 |
| F                | -1.649507               | -1.101626 | 0.000440  |
| F                | -1.650515               | 1.101150  | 0.000439  |
| -----            |                         |           |           |

--

-----

--

F-Ga≡N-F-TS1

-----

| Atomic<br>Number | Coordinates (Angstroms) |           |           |
|------------------|-------------------------|-----------|-----------|
|                  | X                       | Y         | Z         |
| -----            |                         |           |           |
| --               |                         |           |           |
| Ga               | -0.105738               | 0.139888  | 0.000063  |
| N                | 1.467468                | 1.056253  | -0.000102 |
| F                | 1.037879                | -1.233924 | -0.000038 |
| F                | -1.815034               | -0.069444 | -0.000098 |
| -----            |                         |           |           |

--

-----

--

F-Ga≡N-F-TS2

-----

| Atomic<br>Number | Coordinates (Angstroms) |           |           |
|------------------|-------------------------|-----------|-----------|
|                  | X                       | Y         | Z         |
| -----            |                         |           |           |
| --               |                         |           |           |
| Ga               | -0.901940               | -0.225006 | -0.000024 |

|   |          |           |           |
|---|----------|-----------|-----------|
| N | 0.885417 | -0.368348 | 0.000238  |
| F | 0.224427 | 1.408659  | 0.000008  |
| F | 2.193597 | -0.347146 | -0.000110 |

HO-Ga≡N-OH

| Atomic<br>Number | Coordinates (Angstroms) |   |   |
|------------------|-------------------------|---|---|
|                  | X                       | Y | Z |

|    |           |           |           |
|----|-----------|-----------|-----------|
| Ga | -0.385122 | 0.213708  | 0.009455  |
| N  | 1.250283  | -0.523541 | 0.202631  |
| O  | 2.427554  | -0.012649 | -0.226976 |
| H  | 2.921634  | 0.229391  | 0.569849  |
| O  | -2.106651 | -0.256322 | 0.006896  |
| H  | -2.302044 | -1.037791 | -0.520734 |

(OH)<sub>2</sub>-Ga≡N

| Atomic<br>Number | Coordinates (Angstroms) |   |   |
|------------------|-------------------------|---|---|
|                  | X                       | Y | Z |

|    |           |           |           |
|----|-----------|-----------|-----------|
| Ga | 0.240479  | -0.268121 | 0.000061  |
| N  | -1.489643 | -0.670032 | 0.000194  |
| O  | 1.878525  | 0.387561  | -0.028973 |
| H  | 1.911193  | 1.336053  | 0.151426  |

|   |           |          |           |
|---|-----------|----------|-----------|
| O | -1.513425 | 0.925186 | 0.105153  |
| H | -1.859339 | 1.163937 | -0.764094 |

-----  
--  
-----  
--  
Ga≡N-(OH)2  
-----

| Atomic<br>Number | Coordinates (Angstroms) |           |           |
|------------------|-------------------------|-----------|-----------|
|                  | X                       | Y         | Z         |
| Ga               | -1.123954               | 0.000000  | 0.000000  |
| N                | 0.792823                | 0.000000  | -0.000000 |
| O                | 1.587063                | -1.145088 | -0.109947 |
| H                | 1.949905                | -1.299418 | 0.775111  |
| O                | 1.587063                | 1.145087  | 0.109947  |
| H                | 1.949907                | 1.299418  | -0.775110 |

-----  
--  
-----  
--  
HO-Ga≡N-OH-TS1  
-----

| Atomic<br>Number | Coordinates (Angstroms) |           |           |
|------------------|-------------------------|-----------|-----------|
|                  | X                       | Y         | Z         |
| Ga               | -0.059604               | -0.122477 | 0.003623  |
| N                | 1.360588                | -1.281277 | -0.008816 |
| O                | 0.908013                | 1.409208  | -0.038792 |

|   |           |           |           |
|---|-----------|-----------|-----------|
| O | -1.824658 | -0.078275 | -0.006206 |
| H | 1.822891  | 1.300044  | 0.238654  |
| H | -2.166113 | 0.818212  | 0.070718  |

HO-Ga≡N-OH-TS2

| Atomic<br>Number | Coordinates (Angstroms) |           |           |
|------------------|-------------------------|-----------|-----------|
|                  | X                       | Y         | Z         |
| Ga               | 0.808695                | -0.369225 | -0.036579 |
| N                | -1.167720               | -0.165044 | 0.509009  |
| O                | -2.148246               | -0.178593 | -0.312838 |
| H                | -2.982463               | -0.000418 | 0.175313  |
| O                | 0.453646                | 1.517945  | 0.028996  |
| H                | -0.356243               | 1.886873  | -0.333687 |

H-Ga≡N-H

| Atomic<br>Number | Coordinates (Angstroms) |           |           |
|------------------|-------------------------|-----------|-----------|
|                  | X                       | Y         | Z         |
| Ga               | -0.314897               | -0.022312 | 0.000006  |
| N                | 1.369920                | 0.156096  | -0.000003 |
| H                | 1.993695                | -0.640899 | -0.000049 |
| H                | -1.821322               | 0.239894  | -0.000100 |

-----  
--  
-----  
--  
H2-Ga≡N  
-----  
--

| Atomic<br>Number | Coordinates (Angstroms) |           |           |
|------------------|-------------------------|-----------|-----------|
|                  | X                       | Y         | Z         |
| H                | -1.386447               | -1.004291 | -0.000000 |
| Ga               | 0.000326                | -0.279472 | -0.000000 |
| H                | 1.374074                | -1.027437 | -0.000000 |
| N                | 0.000326                | 1.527910  | 0.000000  |

-----  
--  
-----  
--

-----  
--  
-----  
--  
Ga≡N-H2  
-----  
--

| Atomic<br>Number | Coordinates (Angstroms) |           |           |
|------------------|-------------------------|-----------|-----------|
|                  | X                       | Y         | Z         |
| Ga               | -0.000000               | 0.451095  | 0.000000  |
| N                | -0.000000               | -1.423971 | 0.000000  |
| H                | 0.825695                | -2.008074 | -0.000000 |
| H                | -0.825686               | -2.008089 | 0.000000  |

-----  
--  
-----  
--



H-Ga≡N-H-TS1

---

--

| Atomic<br>Number | Coordinates (Angstroms) |           |           |
|------------------|-------------------------|-----------|-----------|
|                  | X                       | Y         | Z         |
| Ga               | 0.281755                | -0.000558 | -0.000989 |
| N                | -1.533424               | -0.026492 | 0.001256  |
| H                | 0.823846                | 1.471715  | 0.010203  |
| H                | 1.175714                | -1.268980 | 0.011662  |

---

H-Ga≡N-H-TS2

---

--

| Atomic<br>Number | Coordinates (Angstroms) |           |           |
|------------------|-------------------------|-----------|-----------|
|                  | X                       | Y         | Z         |
| Ga               | -0.386689               | -0.040131 | -0.000222 |
| N                | 1.364660                | -0.005363 | 0.003533  |
| H                | 2.354916                | -0.233901 | -0.015378 |
| H                | 0.079831                | 1.515486  | -0.002468 |

---

GaC-Ga≡N-CH3

---

--

| Atomic<br>Number | Coordinates (Angstroms) |   |   |
|------------------|-------------------------|---|---|
|                  | X                       | Y | Z |

--

|    |           |           |           |
|----|-----------|-----------|-----------|
| Ga | -0.371011 | -0.080435 | 0.000223  |
| N  | 1.245579  | 0.374154  | 0.000356  |
| C  | -2.298376 | 0.080656  | -0.000413 |
| H  | -2.570921 | 1.135722  | -0.049567 |
| H  | -2.709170 | -0.353375 | 0.910556  |
| H  | -2.715169 | -0.437271 | -0.863518 |
| C  | 2.596028  | -0.070808 | -0.000425 |
| H  | 2.864073  | -0.667973 | 0.882054  |
| H  | 3.263396  | 0.802432  | 0.001488  |
| H  | 2.864171  | -0.664233 | -0.885395 |

--

(CH<sub>3</sub>)<sub>2</sub>-Ga≡N

--

| Atomic<br>Number | Coordinates (Angstroms) |   |   |
|------------------|-------------------------|---|---|
|                  | X                       | Y | Z |

--

|    |           |           |           |
|----|-----------|-----------|-----------|
| N  | -0.026278 | 1.917325  | 0.000453  |
| Ga | 0.000801  | 0.102985  | -0.000302 |
| C  | -1.727410 | -0.873691 | 0.000732  |
| H  | -1.792470 | -1.456916 | -0.919223 |
| H  | -2.572947 | -0.192160 | 0.062764  |
| H  | -1.737954 | -1.553903 | 0.853730  |
| C  | 1.743850  | -0.844697 | -0.000171 |
| H  | 2.577660  | -0.149190 | -0.066758 |
| H  | 1.765182  | -1.528714 | -0.849911 |
| H  | 1.821003  | -1.422596 | 0.922209  |

--

-----  
--  
Ga≡N-(CH3)2  
-----

-----

| Atomic<br>Number | Coordinates (Angstroms) |           |           |
|------------------|-------------------------|-----------|-----------|
|                  | X                       | Y         | Z         |
| H                | 0.927101                | 2.092001  | 0.000463  |
| C                | 1.563708                | 1.201846  | 0.000000  |
| H                | 2.211931                | 1.259942  | -0.884762 |
| H                | 2.212943                | 1.259650  | 0.884035  |
| N                | 0.762602                | -0.000024 | 0.000092  |
| Ga               | -1.122864               | -0.000030 | -0.000004 |
| C                | 1.563925                | -1.201741 | -0.000018 |
| H                | 2.211556                | -1.260403 | 0.885143  |
| H                | 0.927467                | -2.092000 | -0.001633 |
| H                | 2.213766                | -1.258738 | -0.883658 |

-----

-----  
--  
GaC-Ga≡N-CH3-TS1  
-----

-----

| Atomic<br>Number | Coordinates (Angstroms) |           |           |
|------------------|-------------------------|-----------|-----------|
|                  | X                       | Y         | Z         |
| N                | -0.505085               | 1.844261  | 0.000703  |
| Ga               | 0.023015                | 0.096361  | -0.000697 |
| C                | -1.603306               | -1.079722 | 0.000682  |
| H                | -1.589312               | -1.678052 | -0.921061 |
| H                | -2.535543               | -0.507827 | 0.057150  |

-----

|   |           |           |           |
|---|-----------|-----------|-----------|
| H | -1.531488 | -1.757339 | 0.862654  |
| C | 1.892439  | -0.561730 | -0.000678 |
| H | 2.612593  | 0.257174  | -0.111074 |
| H | 2.041089  | -1.280502 | -0.818423 |
| H | 2.090001  | -1.081757 | 0.947420  |

--

--

GaC-Ga≡N-CH3-TS2

--

| Atomic<br>Number | Coordinates (Angstroms) |   |   |
|------------------|-------------------------|---|---|
|                  | X                       | Y | Z |

--

|    |           |           |           |
|----|-----------|-----------|-----------|
| Ga | 0.794074  | -0.459335 | -0.007095 |
| N  | -0.963336 | -0.200989 | 0.082363  |
| C  | 0.497328  | 1.711906  | 0.000332  |
| H  | 1.376405  | 2.002573  | 0.570627  |
| H  | -0.412425 | 2.096795  | 0.441683  |
| H  | 0.589622  | 1.963032  | -1.052304 |
| C  | -2.353207 | -0.082670 | -0.042022 |
| H  | -2.832065 | -0.998204 | 0.342332  |
| H  | -2.733491 | 0.112719  | -1.054386 |
| H  | -2.725720 | 0.693986  | 0.645593  |

--

GaSi-Ga≡N-SiH3

--

| Atomic<br>Number | Coordinates (Angstroms) |   |   |
|------------------|-------------------------|---|---|
|                  | X                       | Y | Z |

--

|    |           |           |           |
|----|-----------|-----------|-----------|
| Ga | 0.397734  | -0.012714 | 0.011429  |
| N  | -1.268263 | -0.157267 | -0.011540 |
| Si | 2.755198  | 0.029545  | -0.010077 |
| H  | 3.193153  | 1.284984  | -0.664859 |
| H  | 3.243217  | -1.145832 | -0.769889 |
| H  | 3.244734  | -0.019643 | 1.387798  |
| Si | -2.943593 | 0.045875  | -0.005183 |
| H  | -3.571774 | -0.560373 | -1.216176 |
| H  | -3.350149 | 1.483192  | 0.020628  |
| H  | -3.573553 | -0.603215 | 1.182629  |

--

--  
-----  
--  
(SiH3)2-Ga≡N  
-----

--

| Atomic<br>Number | Coordinates (Angstroms) |           |           |
|------------------|-------------------------|-----------|-----------|
|                  | X                       | Y         | Z         |
| N                | -0.024837               | 2.170560  | 0.000581  |
| Ga               | 0.001246                | 0.392208  | -0.000368 |
| Si               | -2.118596               | -0.765768 | 0.000175  |
| H                | -3.260153               | 0.178287  | 0.009340  |
| H                | -2.163660               | -1.628356 | 1.208786  |
| H                | -2.172052               | -1.615059 | -1.217441 |
| Si               | 2.126059                | -0.753481 | 0.000138  |
| H                | 2.181158                | -1.615327 | -1.208501 |
| H                | 3.259964                | 0.199940  | -0.006991 |
| H                | 2.185498                | -1.602364 | 1.217776  |

--

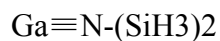

-----

| Atomic<br>Number | Coordinates (Angstroms) |           |           |
|------------------|-------------------------|-----------|-----------|
|                  | X                       | Y         | Z         |
| H                | 0.214947                | -2.566267 | 0.293103  |
| Si               | 1.249886                | -1.520228 | 0.007363  |
| H                | 2.273262                | -1.570973 | 1.088021  |
| H                | 1.909269                | -1.904004 | -1.268888 |
| N                | 0.448956                | 0.001876  | -0.077221 |
| Ga               | -1.479404               | -0.019708 | 0.004279  |
| Si               | 1.191271                | 1.554737  | 0.006458  |
| H                | 2.092388                | 1.841587  | -1.142902 |
| H                | 0.084686                | 2.561287  | -0.015728 |
| H                | 1.968075                | 1.753042  | 1.260822  |

-----

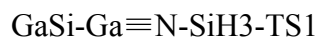

| Atomic<br>Number | Coordinates (Angstroms) |           |           |
|------------------|-------------------------|-----------|-----------|
|                  | X                       | Y         | Z         |
| Ga               | -0.022581               | -0.456349 | 0.004160  |
| N                | 0.292870                | -2.198873 | -0.007461 |
| Si               | -2.108702               | 0.748028  | -0.001518 |
| H                | -2.072262               | 1.791088  | 1.054938  |
| H                | -3.248079               | -0.170062 | 0.239313  |

|    |           |          |           |
|----|-----------|----------|-----------|
| H  | -2.257390 | 1.400654 | -1.327623 |
| Si | 2.035822  | 0.893283 | -0.001873 |
| H  | 2.058454  | 1.647490 | 1.277150  |
| H  | 1.939362  | 1.835487 | -1.145692 |
| H  | 3.250157  | 0.055929 | -0.127329 |

-----  
--

-----  
--

GaSi-Ga≡N-SiH3-TS2

-----  
--

| Atomic<br>Number | Coordinates (Angstroms) |   |   |
|------------------|-------------------------|---|---|
|                  | X                       | Y | Z |

-----  
--

|    |           |           |           |
|----|-----------|-----------|-----------|
| Ga | 0.709655  | -0.973032 | 0.000446  |
| N  | -0.810839 | -0.118709 | -0.004163 |
| Si | 1.547058  | 1.344473  | 0.000027  |
| H  | 0.978308  | 2.089207  | -1.142428 |
| H  | 3.025823  | 1.286917  | -0.148061 |
| H  | 1.219066  | 1.946292  | 1.310571  |
| Si | -2.451826 | 0.370280  | 0.002693  |
| H  | -3.239533 | -0.320541 | -1.058871 |
| H  | -2.478245 | 1.835681  | -0.279324 |
| H  | -3.162107 | 0.150856  | 1.295368  |

-----  
--

-----  
--

B3LYP/LANL2DZ+dp

-----  
--

-----  
--

F-Ga≡N-F

---

--

| Atomic<br>Number | Coordinates (Angstroms) |           |           |
|------------------|-------------------------|-----------|-----------|
|                  | X                       | Y         | Z         |
| Ga               | 0.372605                | -0.107485 | 0.000022  |
| N                | -1.252484               | 0.618811  | 0.000071  |
| F                | -2.376031               | -0.218403 | -0.000060 |
| F                | 2.066769                | 0.107333  | -0.000069 |

---

--

F2-Ga=N

---

--

| Atomic<br>Number | Coordinates (Angstroms) |           |           |
|------------------|-------------------------|-----------|-----------|
|                  | X                       | Y         | Z         |
| Ga               | 0.000007                | -0.036678 | 0.000001  |
| N                | 0.001937                | -1.905882 | -0.000002 |
| F                | 1.484560                | 0.805725  | -0.000001 |
| F                | -1.486090               | 0.802962  | -0.000001 |

---

--

Ga=N-F2

---

--

| Atomic<br>Number | Coordinates (Angstroms) |   |   |
|------------------|-------------------------|---|---|
|                  | X                       | Y | Z |



--

|    |           |           |           |
|----|-----------|-----------|-----------|
| Ga | 1.145421  | -0.000012 | 0.000212  |
| N  | -0.810236 | -0.000018 | -0.002053 |
| F  | -1.657636 | -1.114073 | 0.000433  |
| F  | -1.657520 | 1.114129  | 0.000433  |

--

F-Ga $\equiv$ N-F-TS1

--

| Atomic<br>Number | Coordinates (Angstroms) |   |   |
|------------------|-------------------------|---|---|
|                  | X                       | Y | Z |

--

|    |           |           |           |
|----|-----------|-----------|-----------|
| Ga | 0.306760  | 0.207218  | 0.000015  |
| N  | -1.409283 | 0.694582  | -0.000037 |
| F  | -1.821262 | -0.781022 | 0.000004  |
| F  | 1.860752  | -0.472960 | -0.000026 |

--

F-Ga $\equiv$ N-F-TS2

--

| Atomic<br>Number | Coordinates (Angstroms) |   |   |
|------------------|-------------------------|---|---|
|                  | X                       | Y | Z |

--

|    |           |          |           |
|----|-----------|----------|-----------|
| Ga | 0.888793  | 0.265595 | -0.000027 |
| N  | -0.904298 | 0.269861 | 0.000299  |
| F  | -2.225493 | 0.369042 | -0.000132 |

F                    -0.132561    -1.493762    -0.000007

-----

--

-----

--

HO-Ga≡N-OH

-----

--

| Atomic<br>Number | Coordinates (Angstroms) |   |   |
|------------------|-------------------------|---|---|
|                  | X                       | Y | Z |

-----

--

|    |           |           |           |
|----|-----------|-----------|-----------|
| Ga | -0.394164 | 0.227742  | 0.009387  |
| N  | 1.227735  | -0.517457 | 0.169148  |
| O  | 2.450717  | -0.027750 | -0.209014 |
| H  | 2.927576  | 0.164431  | 0.617954  |
| O  | -2.074033 | -0.276979 | -0.012914 |
| H  | -2.316093 | -1.164407 | -0.317575 |

-----

--

-----

--

(OH)<sub>2</sub>-Ga≡N

-----

--

| Atomic<br>Number | Coordinates (Angstroms) |   |   |
|------------------|-------------------------|---|---|
|                  | X                       | Y | Z |

-----

--

|    |           |           |           |
|----|-----------|-----------|-----------|
| Ga | 0.195353  | -0.205641 | -0.004544 |
| N  | -1.481965 | -0.780670 | 0.008008  |
| O  | 1.876208  | 0.227136  | -0.016587 |
| H  | 2.116163  | 1.157642  | 0.099223  |
| O  | -1.375317 | 0.956952  | 0.105527  |
| H  | -1.805487 | 1.209218  | -0.725931 |

-----  
--  
-----  
--  
Ga≡N-(OH)2  
-----

-----

| Atomic<br>Number | Coordinates (Angstroms) |           |           |
|------------------|-------------------------|-----------|-----------|
|                  | X                       | Y         | Z         |
| Ga               | -1.124254               | 0.000000  | 0.000000  |
| N                | 0.784222                | 0.000000  | 0.000000  |
| O                | 1.591334                | -1.159173 | -0.110853 |
| H                | 1.950488                | -1.314310 | 0.782143  |
| O                | 1.591334                | 1.159173  | 0.110853  |
| H                | 1.950487                | 1.314310  | -0.782143 |

-----  
--  
-----  
--

HO-Ga≡N-OH-TS1  
-----

-----

| Atomic<br>Number | Coordinates (Angstroms) |           |           |
|------------------|-------------------------|-----------|-----------|
|                  | X                       | Y         | Z         |
| Ga               | -0.289177               | -0.253350 | 0.014195  |
| N                | 1.436771                | -0.675644 | -0.069682 |
| O                | -1.885374               | 0.453155  | 0.053805  |
| H                | -2.054848               | 1.214715  | -0.519418 |
| O                | 1.734880                | 0.845776  | -0.080105 |

-----  
--  
-----  
--

H 2.165880 0.977200 0.777546

-----

--

-----

--

HO-Ga≡N-OH-TS2

-----

--

| Atomic<br>Number | Coordinates (Angstroms) |   |   |
|------------------|-------------------------|---|---|
|                  | X                       | Y | Z |

-----

--

|    |           |           |           |
|----|-----------|-----------|-----------|
| Ga | 0.760812  | -0.399138 | -0.017320 |
| N  | -1.174552 | 0.004227  | 0.550107  |
| O  | -2.111087 | -0.193077 | -0.335309 |
| H  | -2.960533 | 0.133342  | 0.036229  |
| O  | 0.562844  | 1.469343  | -0.137043 |
| H  | -0.016822 | 2.000219  | 0.428738  |

-----

--

-----

--

H-Ga≡N-H

-----

--

| Atomic<br>Number | Coordinates (Angstroms) |   |   |
|------------------|-------------------------|---|---|
|                  | X                       | Y | Z |

-----

--

|    |           |           |           |
|----|-----------|-----------|-----------|
| Ga | -0.314498 | -0.026186 | -0.000094 |
| N  | 1.352654  | 0.150088  | -0.000003 |
| H  | 2.102754  | -0.538026 | 0.001136  |
| H  | -1.821880 | 0.299185  | 0.001799  |

-----

--

-----  
--  
H2-Ga≡N  
-----

-----

| Atomic<br>Number | Coordinates (Angstroms) |           |           |
|------------------|-------------------------|-----------|-----------|
|                  | X                       | Y         | Z         |
| H                | 1.411405                | -0.978658 | -0.000000 |
| Ga               | 0.000003                | -0.285272 | -0.000000 |
| H                | -1.411508               | -0.978447 | 0.000000  |
| N                | 0.000003                | 1.542932  | 0.000000  |

-----

-----  
--  
Ga≡N-H2  
-----

-----

| Atomic<br>Number | Coordinates (Angstroms) |           |           |
|------------------|-------------------------|-----------|-----------|
|                  | X                       | Y         | Z         |
| Ga               | -0.000001               | 0.449190  | -0.000000 |
| N                | -0.000001               | -1.414091 | 0.000000  |
| H                | 0.827992                | -2.013097 | 0.000000  |
| H                | -0.827944               | -2.013164 | 0.000000  |

-----

-----  
--  
H-Ga≡N-H-TS1  
-----

| Atomic<br>Number | Coordinates (Angstroms) |           |           |
|------------------|-------------------------|-----------|-----------|
|                  | X                       | Y         | Z         |
| -----            |                         |           |           |
| --               |                         |           |           |
| Ga               | 0.285185                | 0.000669  | 0.000038  |
| N                | -1.532717               | -0.059391 | -0.000047 |
| H                | 0.573436                | 1.567893  | -0.000367 |
| H                | 1.314860                | -1.172908 | -0.000474 |
| -----            |                         |           |           |

--

-----

--

H-Ga≡N-H-TS2

| Atomic<br>Number | Coordinates (Angstroms) |           |           |
|------------------|-------------------------|-----------|-----------|
|                  | X                       | Y         | Z         |
| -----            |                         |           |           |
| --               |                         |           |           |
| 3H               | -0.384654               | -0.039533 | 0.000188  |
| N                | 1.351495                | -0.013198 | -0.002823 |
| H                | 2.355198                | -0.217968 | 0.012212  |
| H                | 0.108608                | 1.535885  | 0.001713  |
| -----            |                         |           |           |

--

-----

--

3HC-Ga≡N-CH3

| Atomic<br>Number | Coordinates (Angstroms) |           |          |
|------------------|-------------------------|-----------|----------|
|                  | X                       | Y         | Z        |
| -----            |                         |           |          |
| --               |                         |           |          |
| Ga               | -0.374983               | -0.109705 | 0.000301 |

|   |           |           |           |
|---|-----------|-----------|-----------|
| N | 1.235945  | 0.325067  | 0.001071  |
| C | -2.311215 | 0.144192  | -0.000746 |
| H | -2.532973 | 1.218621  | -0.048866 |
| H | -2.756159 | -0.268493 | 0.913102  |
| H | -2.766609 | -0.350288 | -0.867569 |
| C | 2.630281  | -0.012459 | -0.000841 |
| H | 2.941940  | -0.592791 | 0.885984  |
| H | 3.231372  | 0.914733  | 0.001971  |
| H | 2.940876  | -0.586798 | -0.891929 |

-----  
--  
-----  
--  
(CH3)2-Ga≡N  
-----

| Atomic<br>Number | Coordinates (Angstroms) |           |           |
|------------------|-------------------------|-----------|-----------|
|                  | X                       | Y         | Z         |
| N                | -0.013472               | 1.916297  | 0.000085  |
| Ga               | 0.000574                | 0.087949  | -0.000068 |
| C                | -1.762178               | -0.840449 | 0.000625  |
| H                | -1.864051               | -1.416906 | -0.929553 |
| H                | -2.599814               | -0.138572 | 0.077366  |
| H                | -1.800841               | -1.539714 | 0.847482  |
| C                | 1.770071                | -0.826324 | -0.000593 |
| H                | 2.601292                | -0.118719 | -0.093547 |
| H                | 1.808516                | -1.537543 | -0.837391 |
| H                | 1.884052                | -1.388391 | 0.936959  |

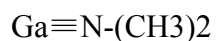

-----

--

| Atomic<br>Number | Coordinates (Angstroms) |           |           |
|------------------|-------------------------|-----------|-----------|
|                  | X                       | Y         | Z         |
| H                | 0.920313                | 2.108853  | 0.001044  |
| C                | 1.560831                | 1.212194  | -0.000003 |
| H                | 2.213779                | 1.274033  | -0.890769 |
| H                | 2.215160                | 1.272977  | 0.889802  |
| N                | 0.751851                | -0.000000 | -0.000015 |
| Ga               | -1.119079               | -0.000000 | -0.000000 |
| C                | 1.560832                | -1.212194 | -0.000002 |
| H                | 2.214340                | -1.273535 | 0.890383  |
| H                | 0.920312                | -2.108852 | -0.000130 |
| H                | 2.214602                | -1.273474 | -0.890189 |

-----

--

-----

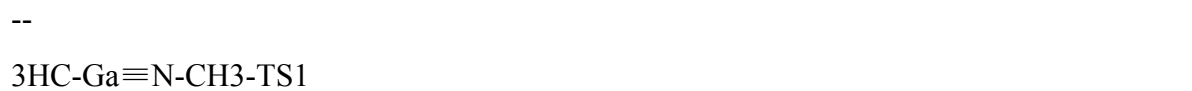

-----

--

| Atomic<br>Number | Coordinates (Angstroms) |           |           |
|------------------|-------------------------|-----------|-----------|
|                  | X                       | Y         | Z         |
| N                | -0.505085               | 1.844261  | 0.000703  |
| Ga               | 0.023015                | 0.096361  | -0.000697 |
| C                | -1.603306               | -1.079722 | 0.000682  |
| H                | -1.589312               | -1.678052 | -0.921061 |
| H                | -2.535543               | -0.507827 | 0.057150  |
| H                | -1.531488               | -1.757339 | 0.862654  |
| C                | 1.892439                | -0.561730 | -0.000678 |

-----



|   |          |           |           |
|---|----------|-----------|-----------|
| H | 2.612593 | 0.257174  | -0.111074 |
| H | 2.041089 | -1.280502 | -0.818423 |
| H | 2.090001 | -1.081757 | 0.947420  |

-----  
--  
-----  
--  
3HC-Ga≡N-CH3-TS2  
-----  
--

| Atomic<br>Number | Coordinates (Angstroms) |           |           |
|------------------|-------------------------|-----------|-----------|
|                  | X                       | Y         | Z         |
| Ga               | 0.772590                | -0.483004 | -0.003632 |
| N                | -0.957118               | -0.155072 | 0.045711  |
| C                | 0.575326                | 1.722725  | -0.000280 |
| H                | 1.206061                | 1.991903  | 0.852301  |
| H                | -0.413232               | 2.170878  | 0.076070  |
| H                | 1.053211                | 1.954071  | -0.956909 |
| C                | -2.369323               | -0.040993 | -0.018248 |
| H                | -2.795843               | -1.056673 | 0.095141  |
| H                | -2.746833               | 0.356376  | -0.977991 |
| H                | -2.789829               | 0.551689  | 0.815188  |

-----  
--  
-----  
--  
3HSi-Ga≡N-SiH3  
-----  
--

| Atomic<br>Number | Coordinates (Angstroms) |   |   |
|------------------|-------------------------|---|---|
|                  | X                       | Y | Z |

|    |           |           |           |
|----|-----------|-----------|-----------|
| Ga | -0.395232 | -0.002973 | -0.001888 |
| N  | 1.265852  | 0.049531  | 0.002682  |
| Si | -2.781646 | -0.002399 | 0.001601  |
| Si | 2.966053  | -0.009555 | 0.000712  |
| H  | -3.255752 | -1.322006 | -0.472237 |
| H  | -3.256742 | 1.068408  | -0.903107 |
| H  | -3.253409 | 0.246014  | 1.382062  |
| H  | 3.557076  | 1.068188  | -0.843828 |
| H  | 3.487186  | -1.304098 | -0.526591 |
| H  | 3.531177  | 0.156277  | 1.371071  |

--

--

(SiH3)<sub>2</sub>-Ga≡N

--

| Atomic<br>Number | Coordinates (Angstroms) |   |   |
|------------------|-------------------------|---|---|
|                  | X                       | Y | Z |

--

|    |           |           |           |
|----|-----------|-----------|-----------|
| N  | 0.022703  | -2.174330 | 0.000401  |
| Ga | -0.001278 | -0.389634 | -0.000249 |
| Si | 2.157170  | 0.763036  | 0.000121  |
| H  | 3.298498  | -0.177624 | 0.006943  |
| H  | 2.205159  | 1.625872  | 1.206035  |
| H  | 2.211542  | 1.616108  | -1.212411 |
| Si | -2.163750 | 0.752108  | 0.000106  |
| H  | -2.220801 | 1.612537  | -1.207061 |
| H  | -3.298682 | -0.196466 | -0.003246 |
| H  | -2.222893 | 1.606511  | 1.211472  |

--

--

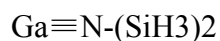

---

--

| Atomic<br>Number | Coordinates (Angstroms) |           |           |
|------------------|-------------------------|-----------|-----------|
|                  | X                       | Y         | Z         |
| H                | 0.250347                | -2.604618 | 0.104580  |
| Si               | 1.271208                | -1.516559 | 0.000013  |
| H                | 2.214089                | -1.651136 | 1.139922  |
| H                | 2.040747                | -1.737509 | -1.253040 |
| N                | 0.418924                | 0.001039  | 0.007004  |
| Ga               | -1.493587               | -0.022491 | -0.000348 |
| Si               | 1.202749                | 1.555723  | -0.000749 |
| H                | 2.126713                | 1.726782  | -1.153441 |
| H                | 0.129790                | 2.584548  | -0.108521 |
| H                | 1.971652                | 1.823582  | 1.242567  |

---

--

---

--

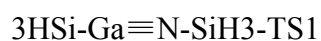

---

--

| Atomic<br>Number | Coordinates (Angstroms) |           |           |
|------------------|-------------------------|-----------|-----------|
|                  | X                       | Y         | Z         |
| Ga               | 0.025311                | -0.411532 | -0.009651 |
| N                | -0.265415               | -2.175765 | 0.016400  |
| Si               | 2.183804                | 0.717911  | 0.004644  |
| H                | 2.303530                | 1.470822  | 1.277107  |
| H                | 2.236176                | 1.672444  | -1.129247 |
| H                | 3.295183                | -0.253472 | -0.107855 |
| Si               | -2.125524               | 0.838190  | 0.004188  |

---

|   |           |           |           |
|---|-----------|-----------|-----------|
| H | -2.128502 | 1.704406  | 1.208314  |
| H | -3.290087 | -0.071777 | 0.028879  |
| H | -2.158963 | 1.680014  | -1.216474 |

-----  
--  
-----  
--

3HSi-Ga≡N-SiH3-TS2

-----  
--

| Atomic<br>Number | Coordinates (Angstroms) |   |   |
|------------------|-------------------------|---|---|
|                  | X                       | Y | Z |

-----  
--

|    |           |           |           |
|----|-----------|-----------|-----------|
| Ga | 0.718812  | -0.985738 | -0.001635 |
| N  | -0.796938 | -0.152072 | 0.005202  |
| Si | 1.515801  | 1.381966  | -0.000252 |
| H  | 0.867058  | 2.167369  | -1.067446 |
| H  | 2.980946  | 1.357229  | -0.240776 |
| H  | 1.253328  | 1.923068  | 1.349027  |
| Si | -2.442085 | 0.367291  | 0.000067  |
| H  | -3.233024 | -0.230412 | -1.110709 |
| H  | -2.444771 | 1.845983  | -0.183140 |
| H  | -3.160184 | 0.069556  | 1.269894  |

-----  
-----

b97d3/LANL2DZ+dp

-----  
--

SiMe(SitBu3)2-In≡N-SiMe(SitBu3)2

-----  
--

| Atomic<br>Number | Coordinates (Angstroms) |   |   |
|------------------|-------------------------|---|---|
|                  | X                       | Y | Z |

--

|    |           |           |           |
|----|-----------|-----------|-----------|
| In | -0.528612 | 0.083047  | -0.408640 |
| N  | 1.303623  | -0.069554 | -0.020094 |
| Si | 2.873465  | 0.435939  | -0.530468 |
| Si | 4.061137  | -1.581715 | -1.364194 |
| Si | 3.567180  | 1.992461  | 1.326840  |
| C  | 2.674681  | 1.505734  | -2.114600 |
| H  | 2.381062  | 0.847490  | -2.947550 |
| H  | 3.566534  | 2.067111  | -2.429226 |
| H  | 1.849299  | 2.218407  | -1.959562 |
| C  | 5.766532  | -1.194402 | -2.279819 |
| C  | 6.297839  | -2.387453 | -3.112589 |
| H  | 6.425865  | -3.297908 | -2.510827 |
| H  | 7.290248  | -2.122019 | -3.524780 |
| H  | 5.651558  | -2.634085 | -3.965303 |
| C  | 6.879737  | -0.833098 | -1.273088 |
| H  | 6.596399  | 0.002435  | -0.624836 |
| H  | 7.788030  | -0.525801 | -1.825850 |
| H  | 7.160451  | -1.683776 | -0.636187 |
| C  | 5.630344  | 0.015815  | -3.236038 |
| H  | 6.588556  | 0.169933  | -3.767787 |
| H  | 5.408667  | 0.942775  | -2.692763 |
| H  | 4.848703  | -0.117406 | -3.993936 |
| C  | 4.355444  | -2.771883 | 0.171842  |
| C  | 4.991649  | -1.969820 | 1.325822  |
| H  | 4.438759  | -1.046289 | 1.530204  |
| H  | 6.035571  | -1.699401 | 1.121903  |
| H  | 4.982101  | -2.573109 | 2.253126  |
| C  | 5.277878  | -3.986924 | -0.082821 |
| H  | 5.359117  | -4.580579 | 0.848408  |
| H  | 6.297880  | -3.677652 | -0.355873 |
| H  | 4.906031  | -4.659227 | -0.867121 |
| C  | 2.990977  | -3.286124 | 0.692493  |
| H  | 2.530605  | -4.015600 | 0.010420  |

|   |          |           |           |
|---|----------|-----------|-----------|
| H | 2.277610 | -2.463394 | 0.843378  |
| H | 3.135700 | -3.794547 | 1.664957  |
| C | 2.880347 | -2.502352 | -2.676970 |
| C | 3.273271 | -3.993271 | -2.847041 |
| H | 2.661180 | -4.434942 | -3.656875 |
| H | 3.069522 | -4.575694 | -1.937981 |
| H | 4.327838 | -4.139000 | -3.115306 |
| C | 1.390674 | -2.488200 | -2.265649 |
| H | 0.820557 | -3.161569 | -2.934562 |
| H | 0.970019 | -1.478245 | -2.365360 |
| H | 1.222874 | -2.809372 | -1.232209 |
| C | 2.920728 | -1.858810 | -4.085485 |
| H | 2.653431 | -0.792012 | -4.064864 |
| H | 2.180920 | -2.368904 | -4.731692 |
| H | 3.897523 | -1.955056 | -4.577033 |
| C | 2.445204 | 3.632037  | 1.094716  |
| C | 3.155085 | 1.182876  | 3.115168  |
| C | 5.455993 | 2.532061  | 1.145306  |
| C | 5.813293 | 3.817872  | 1.924716  |
| H | 5.573296 | 3.734190  | 2.997270  |
| H | 5.302170 | 4.705091  | 1.526473  |
| H | 6.901438 | 4.005089  | 1.844653  |
| C | 5.758096 | 2.772874  | -0.353299 |
| H | 6.828987 | 3.018543  | -0.481571 |
| H | 5.175907 | 3.593925  | -0.787946 |
| H | 5.556561 | 1.872548  | -0.947622 |
| C | 6.442780 | 1.436018  | 1.615894  |
| H | 7.443316 | 1.638603  | 1.190894  |
| H | 6.142774 | 0.433580  | 1.293617  |
| H | 6.552457 | 1.418799  | 2.706557  |
| C | 2.169401 | 0.006352  | 2.956048  |
| H | 2.587802 | -0.824092 | 2.376374  |
| H | 1.253281 | 0.310005  | 2.436370  |
| H | 1.899706 | -0.383453 | 3.956277  |
| C | 4.394375 | 0.652835  | 3.872152  |

|    |           |           |           |
|----|-----------|-----------|-----------|
| H  | 4.961552  | -0.097287 | 3.310204  |
| H  | 4.053114  | 0.173192  | 4.809047  |
| H  | 5.079768  | 1.466143  | 4.155233  |
| C  | 2.482390  | 2.173960  | 4.092447  |
| H  | 1.512095  | 2.530627  | 3.722501  |
| H  | 3.115394  | 3.045105  | 4.313905  |
| H  | 2.293855  | 1.650543  | 5.048869  |
| C  | 0.960897  | 3.236167  | 0.948077  |
| H  | 0.796211  | 2.675199  | 0.020353  |
| H  | 0.332255  | 4.145848  | 0.912703  |
| H  | 0.603753  | 2.610460  | 1.779557  |
| C  | 2.511446  | 4.681163  | 2.244696  |
| H  | 2.113661  | 5.639793  | 1.861024  |
| H  | 1.891071  | 4.404572  | 3.103730  |
| H  | 3.527262  | 4.874163  | 2.610290  |
| C  | 2.833609  | 4.414497  | -0.185865 |
| H  | 2.912049  | 3.785802  | -1.078513 |
| H  | 3.785115  | 4.950532  | -0.060211 |
| H  | 2.059120  | 5.179657  | -0.385869 |
| Si | -3.000253 | 0.229129  | 0.409887  |
| Si | -4.251176 | 1.600136  | -1.248693 |
| Si | -3.240861 | -2.051124 | 1.413936  |
| C  | -2.743693 | 1.518527  | 1.826025  |
| H  | -2.516876 | 2.500873  | 1.392149  |
| H  | -1.920878 | 1.264341  | 2.504274  |
| H  | -3.653992 | 1.625667  | 2.436863  |
| C  | -2.957783 | 2.807231  | -2.131676 |
| C  | -3.677299 | 3.956883  | -2.886256 |
| H  | -2.922691 | 4.548876  | -3.436601 |
| H  | -4.192696 | 4.646669  | -2.205208 |
| H  | -4.408634 | 3.594065  | -3.620251 |
| C  | -2.092063 | 2.066115  | -3.177726 |
| H  | -1.593184 | 1.171545  | -2.765909 |
| H  | -1.296167 | 2.741158  | -3.540725 |
| H  | -2.673554 | 1.745051  | -4.052424 |

|   |           |           |           |
|---|-----------|-----------|-----------|
| C | -1.982393 | 3.460841  | -1.129959 |
| H | -1.291373 | 4.133276  | -1.669533 |
| H | -1.356189 | 2.717425  | -0.617179 |
| H | -2.485210 | 4.054399  | -0.356847 |
| C | -5.091249 | 0.453517  | -2.589747 |
| C | -4.096039 | -0.639543 | -3.040263 |
| H | -3.251230 | -0.235523 | -3.611534 |
| H | -4.613351 | -1.372023 | -3.686450 |
| H | -3.688325 | -1.190450 | -2.184874 |
| C | -5.565641 | 1.201276  | -3.859498 |
| H | -4.731293 | 1.638597  | -4.425556 |
| H | -6.284492 | 2.002331  | -3.640088 |
| H | -6.068504 | 0.481014  | -4.531298 |
| C | -6.318529 | -0.267983 | -1.987986 |
| H | -7.135372 | 0.424244  | -1.740597 |
| H | -6.062118 | -0.823831 | -1.078467 |
| H | -6.714832 | -0.995127 | -2.720940 |
| C | -5.593799 | 2.693179  | -0.295377 |
| C | -6.671461 | 3.240794  | -1.268308 |
| H | -7.371566 | 3.879541  | -0.697702 |
| H | -7.267663 | 2.439667  | -1.725657 |
| H | -6.249857 | 3.855256  | -2.074979 |
| C | -6.342073 | 1.879932  | 0.784577  |
| H | -7.076993 | 2.535737  | 1.287831  |
| H | -5.665925 | 1.498817  | 1.562731  |
| H | -6.899261 | 1.032631  | 0.366340  |
| C | -4.986439 | 3.918323  | 0.434284  |
| H | -4.525756 | 4.642126  | -0.250398 |
| H | -4.240891 | 3.635001  | 1.187776  |
| H | -5.798648 | 4.449604  | 0.964102  |
| C | -1.739860 | -2.328236 | 2.677960  |
| C | -4.950040 | -2.094112 | 2.373149  |
| C | -3.174397 | -3.436660 | 0.027292  |
| C | -2.931066 | -4.848810 | 0.622337  |
| H | -3.703879 | -5.138118 | 1.348023  |



|   |           |           |           |
|---|-----------|-----------|-----------|
| H | -1.953215 | -4.945341 | 1.110586  |
| H | -2.958844 | -5.588334 | -0.199525 |
| C | -2.033434 | -3.161018 | -0.979612 |
| H | -1.990567 | -3.973618 | -1.727531 |
| H | -1.048053 | -3.111206 | -0.500869 |
| H | -2.188889 | -2.225792 | -1.536301 |
| C | -4.496217 | -3.525641 | -0.770211 |
| H | -5.308988 | -3.955901 | -0.167589 |
| H | -4.351711 | -4.189668 | -1.642296 |
| H | -4.834380 | -2.555363 | -1.149720 |
| C | -6.091270 | -1.594037 | 1.464076  |
| H | -5.846908 | -0.637611 | 0.992840  |
| H | -7.005999 | -1.440205 | 2.065677  |
| H | -6.338304 | -2.310217 | 0.670950  |
| C | -5.367530 | -3.501612 | 2.865781  |
| H | -5.528783 | -4.194931 | 2.027720  |
| H | -6.329442 | -3.417329 | 3.405362  |
| H | -4.644590 | -3.958436 | 3.551884  |
| C | -4.898213 | -1.145038 | 3.594395  |
| H | -4.628824 | -0.117892 | 3.308481  |
| H | -4.185423 | -1.478567 | 4.360580  |
| H | -5.896345 | -1.104450 | 4.068117  |
| C | -2.102207 | -3.427704 | 3.710550  |
| H | -1.210883 | -3.630459 | 4.332066  |
| H | -2.399339 | -4.376576 | 3.245020  |
| H | -2.903612 | -3.112637 | 4.392357  |
| C | -0.418319 | -2.769748 | 2.004335  |
| H | -0.491062 | -3.734710 | 1.488179  |
| H | 0.353892  | -2.878802 | 2.786145  |
| H | -0.016091 | -2.030595 | 1.297137  |
| C | -1.389393 | -1.054063 | 3.479546  |
| H | -0.874297 | -0.320428 | 2.847054  |
| H | -2.259864 | -0.568285 | 3.938618  |
| H | -0.684504 | -1.317216 | 4.288038  |

--  
-----  
--  
[SiMe(SitBu3)2]2-In=N  
-----  
--

| Atomic<br>Number | Coordinates (Angstroms) |           |           |
|------------------|-------------------------|-----------|-----------|
|                  | X                       | Y         | Z         |
| In               | -0.206787               | -0.251187 | -0.642855 |
| N                | -0.891750               | -1.006294 | -2.493270 |
| Si               | 2.542919                | -0.152204 | 0.475809  |
| Si               | -2.574014               | 0.206863  | 0.584912  |
| Si               | 3.941237                | -1.691299 | -1.213708 |
| Si               | 3.338445                | 2.105956  | 1.370606  |
| Si               | -3.804957               | 1.787045  | -1.241999 |
| Si               | -3.364631               | -2.074085 | 1.394900  |
| C                | 2.395962                | -1.314517 | 2.035101  |
| H                | 1.588642                | -2.046952 | 1.889752  |
| H                | 2.144400                | -0.743030 | 2.950513  |
| H                | 3.326200                | -1.879536 | 2.245867  |
| C                | -2.428848               | 1.326478  | 2.176396  |
| H                | -3.403478               | 1.517453  | 2.672391  |
| H                | -2.001442               | 2.308847  | 1.906560  |
| H                | -1.749370               | 0.872252  | 2.929384  |
| C                | -5.562244               | 2.332253  | -0.513012 |
| C                | -2.648501               | 3.355239  | -1.415220 |
| C                | -3.985979               | 0.975641  | -3.011014 |
| C                | -5.014900               | 1.772768  | -3.873899 |
| H                | -6.022673               | 1.723206  | -3.454500 |
| H                | -5.060107               | 1.311283  | -4.866585 |
| H                | -4.758196               | 2.821896  | -4.013895 |
| C                | -2.694292               | 0.913323  | -3.855493 |
| H                | -2.378794               | 1.898640  | -4.167607 |

|   |           |           |           |
|---|-----------|-----------|-----------|
| H | -2.929508 | 0.341148  | -4.746642 |
| H | -1.867935 | 0.401742  | -3.371646 |
| C | -4.574502 | -0.447596 | -2.951314 |
| H | -5.585783 | -0.450845 | -2.537486 |
| H | -3.973632 | -1.143594 | -2.375860 |
| H | -4.641683 | -0.844941 | -3.969869 |
| C | -3.088233 | 4.280075  | -2.587399 |
| H | -4.125295 | 4.615645  | -2.501646 |
| H | -2.960951 | 3.811986  | -3.563725 |
| H | -2.452173 | 5.180857  | -2.577149 |
| C | -1.190246 | 2.963106  | -1.726733 |
| H | -1.080184 | 2.504657  | -2.696678 |
| H | -0.785166 | 2.313893  | -0.942576 |
| H | -0.574272 | 3.877990  | -1.721697 |
| C | -2.660797 | 4.255054  | -0.159116 |
| H | -3.636049 | 4.745262  | -0.022730 |
| H | -1.910307 | 5.058185  | -0.277712 |
| H | -2.422334 | 3.719662  | 0.770917  |
| C | -6.171988 | 3.591491  | -1.179380 |
| H | -7.186707 | 3.750609  | -0.767322 |
| H | -6.271485 | 3.505382  | -2.266265 |
| H | -5.592633 | 4.498038  | -0.956478 |
| C | -6.581555 | 1.179827  | -0.675203 |
| H | -7.485457 | 1.396112  | -0.074359 |
| H | -6.182815 | 0.216579  | -0.332215 |
| H | -6.904890 | 1.061805  | -1.716833 |
| C | -5.458756 | 2.657563  | 0.994609  |
| H | -6.469278 | 2.873979  | 1.395911  |
| H | -4.827787 | 3.536469  | 1.199438  |
| H | -5.051122 | 1.818226  | 1.576774  |
| C | -3.825474 | -3.230496 | -0.093362 |
| C | -1.770303 | -2.819458 | 2.291170  |
| C | -4.832756 | -1.852349 | 2.696125  |
| C | -5.228117 | -2.863101 | -0.639373 |
| H | -5.343605 | -1.799488 | -0.864938 |

|   |           |           |           |
|---|-----------|-----------|-----------|
| H | -6.014441 | -3.142023 | 0.077083  |
| H | -5.419936 | -3.419913 | -1.569495 |
| C | -2.760863 | -3.212424 | -1.253385 |
| H | -2.223619 | -2.271454 | -1.472478 |
| H | -3.259107 | -3.509275 | -2.182151 |
| H | -1.994932 | -3.959969 | -1.060755 |
| C | -3.935804 | -4.722107 | 0.334050  |
| H | -4.677598 | -4.882909 | 1.127007  |
| H | -2.980750 | -5.136755 | 0.673196  |
| H | -4.252944 | -5.313900 | -0.539646 |
| C | -5.897337 | -0.902173 | 2.114366  |
| H | -6.685090 | -0.701122 | 2.869628  |
| H | -6.393167 | -1.313973 | 1.223096  |
| H | -5.450042 | 0.065482  | 1.837409  |
| C | -4.316965 | -1.197228 | 4.001313  |
| H | -5.179825 | -0.964047 | 4.660489  |
| H | -3.784812 | -0.247621 | 3.808724  |
| H | -3.640253 | -1.854531 | 4.573863  |
| C | -5.533162 | -3.181157 | 3.064613  |
| H | -6.307063 | -2.979586 | 3.833153  |
| H | -4.842854 | -3.930536 | 3.479443  |
| H | -6.045462 | -3.627007 | 2.198924  |
| C | -2.141038 | -3.976516 | 3.252733  |
| H | -2.732111 | -3.620775 | 4.110740  |
| H | -1.213792 | -4.423147 | 3.661473  |
| H | -2.707122 | -4.780322 | 2.762858  |
| C | -0.739775 | -3.368158 | 1.282312  |
| H | -0.443795 | -2.622071 | 0.535854  |
| H | -1.095897 | -4.248767 | 0.746431  |
| H | 0.170006  | -3.665294 | 1.830865  |
| C | -1.043731 | -1.751725 | 3.133483  |
| H | -1.690757 | -1.275565 | 3.890770  |
| H | -0.623662 | -0.947783 | 2.495502  |
| H | -0.188442 | -2.212011 | 3.671102  |
| C | 3.072964  | -3.471143 | -1.265724 |

|   |          |           |           |
|---|----------|-----------|-----------|
| C | 1.781812 | -3.461107 | -2.135288 |
| H | 1.266646 | -4.420911 | -2.000707 |
| H | 2.014003 | -3.368383 | -3.199041 |
| H | 1.074758 | -2.665335 | -1.886296 |
| C | 4.030939 | -4.544941 | -1.847018 |
| H | 3.474911 | -5.492745 | -1.960885 |
| H | 4.873320 | -4.747997 | -1.168280 |
| H | 4.442696 | -4.284418 | -2.829320 |
| C | 2.655176 | -3.983127 | 0.127298  |
| H | 2.284764 | -5.019792 | 0.031727  |
| H | 1.839420 | -3.390619 | 0.545883  |
| H | 3.475147 | -3.996518 | 0.861913  |
| C | 3.971201 | -0.952388 | -3.049782 |
| C | 5.800225 | -1.882332 | -0.518097 |
| C | 2.562257 | -0.437850 | -3.454983 |
| H | 1.821025 | -1.237852 | -3.552717 |
| H | 2.628304 | 0.066674  | -4.435752 |
| H | 2.143897 | 0.283803  | -2.738014 |
| C | 4.408978 | -1.998029 | -4.106846 |
| H | 3.697388 | -2.827220 | -4.195867 |
| H | 5.403315 | -2.420182 | -3.898357 |
| H | 4.460580 | -1.505682 | -5.095470 |
| C | 4.944651 | 0.240352  | -3.165393 |
| H | 4.702568 | 1.044433  | -2.455724 |
| H | 4.878745 | 0.670754  | -4.183392 |
| H | 5.996293 | -0.051164 | -3.006098 |
| C | 6.805888 | -2.487144 | -1.524276 |
| H | 6.530964 | -3.502687 | -1.848704 |
| H | 7.804425 | -2.553068 | -1.042045 |
| H | 6.921047 | -1.859177 | -2.422909 |
| C | 6.295580 | -0.482684 | -0.115871 |
| H | 5.531139 | 0.022658  | 0.500096  |
| H | 6.504009 | 0.166146  | -0.983875 |
| H | 7.227979 | -0.542856 | 0.487224  |
| C | 5.815147 | -2.751665 | 0.763854  |

|   |          |           |           |
|---|----------|-----------|-----------|
| H | 5.570743 | -3.808912 | 0.566254  |
| H | 5.109564 | -2.383747 | 1.533439  |
| H | 6.830503 | -2.730473 | 1.216110  |
| C | 3.755842 | 3.318339  | -0.144808 |
| C | 4.829147 | 1.898156  | 2.710257  |
| C | 1.741082 | 2.838861  | 2.310614  |
| C | 6.216719 | 2.275927  | 2.138849  |
| H | 6.485689 | 1.716310  | 1.230548  |
| H | 6.993862 | 2.058722  | 2.904629  |
| H | 6.281541 | 3.356335  | 1.911586  |
| C | 4.629863 | 2.779439  | 3.962008  |
| H | 3.715285 | 2.515196  | 4.521316  |
| H | 4.596200 | 3.856691  | 3.718357  |
| H | 5.489614 | 2.620561  | 4.648951  |
| C | 4.876166 | 0.429340  | 3.190266  |
| H | 3.961069 | 0.146748  | 3.747905  |
| H | 5.740744 | 0.278504  | 3.875426  |
| H | 4.987190 | -0.278066 | 2.347490  |
| C | 5.176485 | 3.083772  | -0.724169 |
| H | 5.421136 | 2.015529  | -0.833814 |
| H | 5.965914 | 3.548440  | -0.113083 |
| H | 5.239687 | 3.539257  | -1.733733 |
| C | 3.679439 | 4.806994  | 0.255593  |
| H | 2.657047 | 5.127850  | 0.511950  |
| H | 4.017993 | 5.432472  | -0.595339 |
| H | 4.339701 | 5.032805  | 1.114405  |
| C | 2.776883 | 3.056094  | -1.320662 |
| H | 1.720089 | 3.164267  | -1.044577 |
| H | 2.909126 | 2.045935  | -1.738519 |
| H | 2.984430 | 3.772884  | -2.139637 |
| C | 1.947339 | 4.153818  | 3.106940  |
| H | 0.965539 | 4.659372  | 3.222369  |
| H | 2.626204 | 4.865360  | 2.612433  |
| H | 2.333099 | 3.972564  | 4.121515  |
| C | 0.636055 | 3.093009  | 1.271424  |

|   |           |          |          |
|---|-----------|----------|----------|
| H | -0.323675 | 3.303589 | 1.784153 |
| H | 0.503234  | 2.187455 | 0.651719 |
| H | 0.844081  | 3.948584 | 0.609819 |
| C | 1.191765  | 1.756235 | 3.267742 |
| H | 0.351969  | 2.167582 | 3.872585 |
| H | 1.952612  | 1.370070 | 3.977491 |
| H | 0.786233  | 0.891627 | 2.700399 |

--

In=N-[SiMe(SitBu3)2]2

--

| Atomic<br>Number | Coordinates (Angstroms) |           |           |
|------------------|-------------------------|-----------|-----------|
|                  | X                       | Y         | Z         |
| In               | 0.357594                | -1.346171 | -1.537971 |
| N                | 0.019862                | 0.011575  | 0.270964  |
| Si               | 1.737788                | 0.444129  | 0.488289  |
| Si               | 2.850786                | 1.988239  | -1.651250 |
| Si               | 3.319196                | -1.766462 | 1.657304  |
| C                | 2.179682                | 1.627902  | 1.890548  |
| H                | 1.716016                | 2.607654  | 1.761153  |
| H                | 3.270677                | 1.758807  | 1.861371  |
| H                | 1.906332                | 1.238707  | 2.876314  |
| C                | 3.973967                | 3.473456  | -0.928313 |
| C                | 4.347534                | 4.471125  | -2.058987 |
| H                | 4.832198                | 3.996833  | -2.919808 |
| H                | 5.058935                | 5.212225  | -1.648195 |
| H                | 3.477639                | 5.032049  | -2.423276 |
| C                | 5.299128                | 2.971990  | -0.313394 |
| H                | 5.127519                | 2.318113  | 0.550317  |
| H                | 5.880817                | 3.840011  | 0.050130  |
| H                | 5.934073                | 2.433897  | -1.030241 |
| C                | 3.281153                | 4.310402  | 0.176965  |

--

|   |           |           |           |
|---|-----------|-----------|-----------|
| H | 3.870883  | 5.230736  | 0.345963  |
| H | 3.247233  | 3.775526  | 1.131046  |
| H | 2.260530  | 4.617686  | -0.077365 |
| C | 3.975290  | 0.821938  | -2.788250 |
| C | 4.769777  | -0.126241 | -1.872983 |
| H | 4.095755  | -0.666531 | -1.195856 |
| H | 5.508943  | 0.398165  | -1.254235 |
| H | 5.314945  | -0.868423 | -2.485434 |
| C | 4.996123  | 1.565300  | -3.687265 |
| H | 5.548671  | 0.819455  | -4.290353 |
| H | 5.744129  | 2.118529  | -3.102988 |
| H | 4.521553  | 2.265186  | -4.389138 |
| C | 3.142333  | -0.087146 | -3.722222 |
| H | 2.556200  | 0.466916  | -4.467061 |
| H | 2.448593  | -0.737135 | -3.164400 |
| H | 3.825598  | -0.758675 | -4.275479 |
| C | 1.430807  | 2.788160  | -2.772897 |
| C | 1.931045  | 3.207309  | -4.178640 |
| H | 1.091013  | 3.669993  | -4.731485 |
| H | 2.282102  | 2.356461  | -4.776596 |
| H | 2.741431  | 3.947373  | -4.137511 |
| C | 0.275938  | 1.783623  | -2.967934 |
| H | -0.506050 | 2.226864  | -3.611609 |
| H | -0.195201 | 1.524632  | -2.008919 |
| H | 0.609385  | 0.857968  | -3.460877 |
| C | 0.813148  | 4.044857  | -2.122671 |
| H | 0.477547  | 3.849726  | -1.098815 |
| H | -0.067653 | 4.363604  | -2.709584 |
| H | 1.509325  | 4.893622  | -2.097562 |
| C | 1.993794  | -2.470506 | 2.937359  |
| C | 3.975486  | -3.264195 | 0.493138  |
| C | 4.876707  | -1.028251 | 2.644446  |
| C | 5.791644  | -2.136775 | 3.227956  |
| H | 6.211024  | -2.795245 | 2.458324  |
| H | 5.273110  | -2.762459 | 3.966977  |



|    |           |           |           |
|----|-----------|-----------|-----------|
| H  | 6.643911  | -1.654835 | 3.744044  |
| C  | 4.477904  | -0.141074 | 3.848447  |
| H  | 5.398918  | 0.263056  | 4.309086  |
| H  | 3.952317  | -0.710051 | 4.627931  |
| H  | 3.854657  | 0.714590  | 3.568298  |
| C  | 5.728477  | -0.163241 | 1.687187  |
| H  | 6.463314  | 0.433070  | 2.260903  |
| H  | 5.105436  | 0.533592  | 1.113183  |
| H  | 6.289875  | -0.772041 | 0.965115  |
| C  | 3.008746  | -3.503459 | -0.687100 |
| H  | 3.006519  | -2.652591 | -1.385269 |
| H  | 1.974967  | -3.685207 | -0.357910 |
| H  | 3.329014  | -4.392768 | -1.262361 |
| C  | 5.377430  | -3.024298 | -0.127607 |
| H  | 5.484271  | -2.047537 | -0.606071 |
| H  | 5.557649  | -3.791806 | -0.904511 |
| H  | 6.182972  | -3.127677 | 0.612294  |
| C  | 4.095995  | -4.600087 | 1.273603  |
| H  | 3.128384  | -4.988232 | 1.616273  |
| H  | 4.759964  | -4.517307 | 2.145483  |
| H  | 4.531201  | -5.363179 | 0.600625  |
| C  | 0.937056  | -3.289236 | 2.167965  |
| H  | 0.491665  | -2.680837 | 1.368017  |
| H  | 0.122396  | -3.589281 | 2.851951  |
| H  | 1.340826  | -4.205446 | 1.718505  |
| C  | 2.589605  | -3.350908 | 4.064027  |
| H  | 1.762096  | -3.751604 | 4.680486  |
| H  | 3.166566  | -4.207241 | 3.692509  |
| H  | 3.237922  | -2.770073 | 4.736796  |
| C  | 1.234862  | -1.312893 | 3.621964  |
| H  | 0.701873  | -0.702613 | 2.885791  |
| H  | 1.894708  | -0.660401 | 4.207254  |
| H  | 0.479155  | -1.729498 | 4.312848  |
| Si | -1.702426 | -0.011659 | 0.740422  |
| Si | -2.898915 | 2.200483  | 1.518265  |

|    |           |           |           |
|----|-----------|-----------|-----------|
| Si | -3.352788 | -1.963379 | -1.100576 |
| C  | -1.955205 | -1.039183 | 2.323336  |
| H  | -1.491626 | -0.534370 | 3.183027  |
| H  | -1.522969 | -2.043205 | 2.254792  |
| H  | -3.028836 | -1.143794 | 2.539477  |
| C  | -1.438545 | 3.213926  | 2.346452  |
| C  | -1.862360 | 4.458574  | 3.161869  |
| H  | -0.951157 | 4.996972  | 3.485268  |
| H  | -2.416572 | 4.192929  | 4.072368  |
| H  | -2.472878 | 5.165926  | 2.585323  |
| C  | -0.489899 | 3.691913  | 1.232257  |
| H  | -0.159726 | 2.855203  | 0.601742  |
| H  | 0.405651  | 4.161983  | 1.676142  |
| H  | -0.954462 | 4.447060  | 0.586319  |
| C  | -0.627973 | 2.302424  | 3.292533  |
| H  | 0.251112  | 2.853013  | 3.670935  |
| H  | -0.259353 | 1.411000  | 2.775017  |
| H  | -1.204531 | 1.972788  | 4.162837  |
| C  | -3.636157 | 3.213775  | -0.006407 |
| C  | -2.739627 | 2.993149  | -1.247265 |
| H  | -1.731035 | 3.399272  | -1.118803 |
| H  | -3.187979 | 3.495268  | -2.125614 |
| H  | -2.637098 | 1.925006  | -1.491684 |
| C  | -3.724530 | 4.737558  | 0.261182  |
| H  | -2.745447 | 5.196483  | 0.446934  |
| H  | -4.378364 | 4.975633  | 1.112037  |
| H  | -4.151450 | 5.233311  | -0.630974 |
| C  | -5.055170 | 2.756143  | -0.408009 |
| H  | -5.788257 | 2.845336  | 0.405355  |
| H  | -5.063179 | 1.721872  | -0.760117 |
| H  | -5.413817 | 3.387107  | -1.243011 |
| C  | -4.284495 | 1.952329  | 2.939520  |
| C  | -5.061438 | 3.277327  | 3.161906  |
| H  | -5.770114 | 3.132577  | 3.999675  |
| H  | -5.657102 | 3.561500  | 2.283810  |

|   |           |           |           |
|---|-----------|-----------|-----------|
| H | -4.416015 | 4.124348  | 3.423511  |
| C | -5.350511 | 0.885956  | 2.630235  |
| H | -6.030594 | 0.795861  | 3.498346  |
| H | -4.915579 | -0.104843 | 2.452585  |
| H | -5.965173 | 1.153436  | 1.764346  |
| C | -3.670685 | 1.548719  | 4.302487  |
| H | -3.052209 | 2.340801  | 4.741932  |
| H | -3.069752 | 0.631349  | 4.238728  |
| H | -4.493851 | 1.353335  | 5.014808  |
| C | -2.657049 | -3.866593 | -0.980076 |
| C | -5.213541 | -2.030408 | -0.347450 |
| C | -3.511503 | -1.380245 | -3.017640 |
| C | -4.006171 | -2.520918 | -3.941810 |
| H | -4.986982 | -2.914276 | -3.642965 |
| H | -3.300564 | -3.362755 | -3.977414 |
| H | -4.105914 | -2.133388 | -4.973753 |
| C | -2.167776 | -0.885116 | -3.586023 |
| H | -2.304485 | -0.520220 | -4.621240 |
| H | -1.408281 | -1.680937 | -3.628035 |
| H | -1.772963 | -0.040066 | -3.001545 |
| C | -4.486443 | -0.189234 | -3.172952 |
| H | -5.531287 | -0.472054 | -2.993584 |
| H | -4.428026 | 0.192046  | -4.209567 |
| H | -4.231561 | 0.644288  | -2.504058 |
| C | -5.732844 | -0.595966 | -0.158932 |
| H | -4.975273 | 0.045943  | 0.295869  |
| H | -6.618027 | -0.597269 | 0.500646  |
| H | -6.039922 | -0.140588 | -1.105861 |
| C | -6.268817 | -2.739814 | -1.236966 |
| H | -6.390542 | -2.240015 | -2.207860 |
| H | -7.247606 | -2.681075 | -0.722958 |
| H | -6.062950 | -3.799244 | -1.423988 |
| C | -5.237791 | -2.707968 | 1.044215  |
| H | -4.514892 | -2.260047 | 1.739621  |
| H | -5.031953 | -3.785488 | 0.996780  |

|   |           |           |           |
|---|-----------|-----------|-----------|
| H | -6.243127 | -2.587182 | 1.489176  |
| C | -3.758079 | -4.909263 | -1.306632 |
| H | -3.313497 | -5.920660 | -1.247304 |
| H | -4.169539 | -4.792212 | -2.318848 |
| H | -4.587539 | -4.885825 | -0.590394 |
| C | -1.477594 | -4.198436 | -1.922313 |
| H | -1.632636 | -3.890650 | -2.966248 |
| H | -1.303427 | -5.290331 | -1.919239 |
| H | -0.534887 | -3.745326 | -1.576338 |
| C | -2.155212 | -4.153330 | 0.453517  |
| H | -1.298501 | -3.517111 | 0.705048  |
| H | -2.924893 | -3.995901 | 1.220008  |
| H | -1.819588 | -5.205122 | 0.528034  |

-----  
--

-----  
--

SiiPrDis2-In=N-SiiPrDis2

-----  
--

| Atomic<br>Number | Coordinates (Angstroms) |   |   |
|------------------|-------------------------|---|---|
|                  | X                       | Y | Z |

-----  
--

|    |           |           |           |
|----|-----------|-----------|-----------|
| In | 0.313704  | -0.373285 | -0.002245 |
| N  | -1.453745 | 0.181439  | -0.222950 |
| Si | -2.985402 | 0.384668  | 0.523959  |
| Si | 2.752577  | 0.313422  | -0.603850 |
| C  | -3.790403 | -1.349981 | 0.736796  |
| H  | -4.883840 | -1.202062 | 0.686285  |
| C  | -4.056894 | 1.609229  | -0.537129 |
| H  | -4.184494 | 2.441773  | 0.187955  |
| C  | -2.722619 | 1.491099  | 2.099937  |
| H  | -2.265940 | 2.364146  | 1.591891  |
| C  | -1.678428 | 1.020641  | 3.125952  |

|    |           |           |           |
|----|-----------|-----------|-----------|
| H  | -1.395755 | 1.846144  | 3.805022  |
| H  | -0.754032 | 0.674929  | 2.630780  |
| H  | -2.041754 | 0.194875  | 3.753405  |
| C  | -3.988436 | 2.016511  | 2.810866  |
| H  | -3.717328 | 2.712009  | 3.626612  |
| H  | -4.588589 | 1.209909  | 3.253384  |
| H  | -4.648028 | 2.568143  | 2.123016  |
| C  | 2.384749  | 1.418347  | -2.136590 |
| H  | 1.789727  | 2.260792  | -1.750208 |
| C  | 1.549923  | 0.739030  | -3.237859 |
| H  | 1.353485  | 1.451366  | -4.057600 |
| H  | 0.570174  | 0.392620  | -2.875004 |
| H  | 2.074656  | -0.125200 | -3.674017 |
| C  | 3.684606  | 1.979359  | -2.752484 |
| H  | 3.447655  | 2.698153  | -3.556650 |
| H  | 4.289320  | 1.175406  | -3.204766 |
| H  | 4.317498  | 2.497668  | -2.020103 |
| C  | 3.104292  | 1.430485  | 0.943597  |
| H  | 2.042932  | 1.663624  | 1.191141  |
| C  | 3.835265  | -1.133498 | -1.247736 |
| H  | 3.868088  | -0.842522 | -2.320600 |
| Si | -3.039283 | 2.548358  | -1.846017 |
| Si | -5.886470 | 1.258004  | -0.886458 |
| Si | -3.583434 | -2.250275 | 2.392075  |
| Si | -3.446329 | -2.529838 | -0.728130 |
| C  | -4.010005 | 3.989245  | -2.605411 |
| H  | -3.304118 | 4.632404  | -3.161320 |
| H  | -4.502970 | 4.617109  | -1.845792 |
| H  | -4.779809 | 3.655530  | -3.319056 |
| C  | -1.543939 | 3.379249  | -1.031211 |
| H  | -0.964139 | 3.933847  | -1.790390 |
| H  | -0.890671 | 2.628257  | -0.564451 |
| H  | -1.852948 | 4.103257  | -0.257069 |
| C  | -2.424309 | 1.535232  | -3.309226 |
| H  | -1.891300 | 2.202055  | -4.010400 |

|   |           |           |           |
|---|-----------|-----------|-----------|
| H | -3.247168 | 1.058115  | -3.865845 |
| H | -1.732305 | 0.748696  | -2.983874 |
| C | -6.832025 | 2.852760  | -1.283332 |
| H | -6.648714 | 3.227377  | -2.300695 |
| H | -6.585038 | 3.665135  | -0.578779 |
| H | -7.915132 | 2.656528  | -1.192879 |
| C | -6.794600 | 0.615452  | 0.652653  |
| H | -7.881531 | 0.641780  | 0.458667  |
| H | -6.602431 | 1.260255  | 1.525904  |
| H | -6.544467 | -0.414972 | 0.943393  |
| C | -6.206135 | 0.069066  | -2.314765 |
| H | -5.856045 | -0.952129 | -2.108553 |
| H | -5.714922 | 0.412244  | -3.240799 |
| H | -7.290551 | 0.013949  | -2.515521 |
| C | -4.414526 | -3.954588 | 2.380876  |
| H | -4.350823 | -4.388469 | 3.394794  |
| H | -3.950093 | -4.669479 | 1.686158  |
| H | -5.484226 | -3.879811 | 2.121577  |
| C | -4.470594 | -1.375069 | 3.815860  |
| H | -4.595672 | -2.090145 | 4.648228  |
| H | -5.478470 | -1.044010 | 3.513003  |
| H | -3.936117 | -0.502163 | 4.211762  |
| C | -1.767344 | -2.530840 | 2.854583  |
| H | -1.668443 | -2.703404 | 3.940484  |
| H | -1.134761 | -1.669051 | 2.595261  |
| H | -1.357454 | -3.412910 | 2.339160  |
| C | -1.993801 | -3.716905 | -0.436725 |
| H | -1.071315 | -3.172208 | -0.176925 |
| H | -1.794952 | -4.266995 | -1.373272 |
| H | -2.175154 | -4.461887 | 0.352575  |
| C | -4.998105 | -3.584412 | -1.018556 |
| H | -5.106609 | -4.393977 | -0.281160 |
| H | -4.959512 | -4.047526 | -2.020092 |
| H | -5.917988 | -2.976932 | -0.973831 |
| C | -3.042324 | -1.722544 | -2.379464 |

|    |           |           |           |
|----|-----------|-----------|-----------|
| H  | -2.027626 | -1.305486 | -2.362223 |
| H  | -3.724230 | -0.907912 | -2.648461 |
| H  | -3.100503 | -2.489597 | -3.172817 |
| Si | 3.660077  | 3.271843  | 0.849150  |
| Si | 3.605339  | 0.548128  | 2.570559  |
| Si | 2.996736  | -2.852468 | -1.422542 |
| Si | 5.706410  | -1.203649 | -0.879782 |
| C  | 2.507399  | 4.275298  | -0.263012 |
| H  | 2.623835  | 5.343737  | -0.010313 |
| H  | 1.448668  | 4.016129  | -0.095115 |
| H  | 2.713915  | 4.171133  | -1.337637 |
| C  | 3.429365  | 4.053257  | 2.557227  |
| H  | 3.617329  | 5.137201  | 2.462906  |
| H  | 4.124168  | 3.666279  | 3.318337  |
| H  | 2.402962  | 3.928863  | 2.937479  |
| C  | 5.445296  | 3.653194  | 0.374362  |
| H  | 5.573266  | 4.747793  | 0.450818  |
| H  | 5.720511  | 3.360556  | -0.648429 |
| H  | 6.170695  | 3.190517  | 1.061385  |
| C  | 2.538055  | 1.159446  | 4.006284  |
| H  | 2.871529  | 2.116780  | 4.429669  |
| H  | 2.566773  | 0.409258  | 4.815843  |
| H  | 1.482634  | 1.273020  | 3.706963  |
| C  | 3.238555  | -1.295303 | 2.476591  |
| H  | 3.675228  | -1.811897 | 3.348570  |
| H  | 3.635985  | -1.771151 | 1.574542  |
| H  | 2.152552  | -1.482878 | 2.503837  |
| C  | 5.421392  | 0.785509  | 3.018089  |
| H  | 5.688517  | 1.850066  | 3.111002  |
| H  | 6.105259  | 0.330738  | 2.286918  |
| H  | 5.617513  | 0.309779  | 3.994888  |
| C  | 6.162976  | -2.328965 | 0.563168  |
| H  | 5.841396  | -1.930275 | 1.535874  |
| H  | 7.261224  | -2.437438 | 0.598132  |
| H  | 5.735352  | -3.338618 | 0.456719  |

|   |          |           |           |
|---|----------|-----------|-----------|
| C | 6.382383 | 0.519486  | -0.562467 |
| H | 6.330599 | 1.126961  | -1.479894 |
| H | 7.442558 | 0.468117  | -0.260075 |
| H | 5.836791 | 1.054959  | 0.221154  |
| C | 6.626415 | -1.802910 | -2.421016 |
| H | 7.684231 | -1.493141 | -2.351058 |
| H | 6.213890 | -1.347217 | -3.338065 |
| H | 6.609530 | -2.894218 | -2.552314 |
| C | 4.160229 | -4.105300 | -2.227652 |
| H | 5.046099 | -4.338373 | -1.617196 |
| H | 4.508281 | -3.770846 | -3.217890 |
| H | 3.603161 | -5.047472 | -2.372644 |
| C | 1.523843 | -2.768012 | -2.605686 |
| H | 0.710703 | -2.092782 | -2.298090 |
| H | 1.081824 | -3.775471 | -2.691827 |
| H | 1.839217 | -2.456307 | -3.615002 |
| C | 2.395359 | -3.662371 | 0.171852  |
| H | 1.645597 | -3.074840 | 0.723511  |
| H | 3.215445 | -3.892038 | 0.869140  |
| H | 1.915114 | -4.617178 | -0.104540 |

-----  
--  
-----  
--  
[SiiPrDis2]-In=N

-----  
--  

| Atomic<br>Number | Coordinates (Angstroms) |           |           |
|------------------|-------------------------|-----------|-----------|
|                  | X                       | Y         | Z         |
| N                | -0.363572               | 0.065718  | -2.626117 |
| In               | 0.092805                | -0.385460 | -0.787362 |
| Si               | 2.389771                | 0.206219  | 0.426616  |
| Si               | -2.320199               | -0.368895 | 0.526572  |



|    |           |           |           |
|----|-----------|-----------|-----------|
| C  | 3.356982  | 1.287510  | -0.834145 |
| H  | 4.369712  | 1.368605  | -0.390336 |
| C  | 3.466347  | -1.211487 | 1.151163  |
| H  | 3.016525  | -1.270575 | 2.159747  |
| C  | 1.577921  | 1.111844  | 1.984893  |
| H  | 0.530992  | 1.266442  | 1.669159  |
| C  | 2.095827  | 2.493669  | 2.422700  |
| H  | 1.579554  | 2.809009  | 3.348560  |
| H  | 1.906385  | 3.265223  | 1.668562  |
| H  | 3.171315  | 2.489941  | 2.639577  |
| C  | 1.515895  | 0.192623  | 3.223175  |
| H  | 0.849231  | 0.632362  | 3.983981  |
| H  | 2.507365  | 0.084096  | 3.691215  |
| H  | 1.138139  | -0.813845 | 2.995047  |
| C  | -1.794646 | -1.006263 | 2.270107  |
| H  | -1.121498 | -0.230785 | 2.662852  |
| C  | -1.007720 | -2.327216 | 2.242436  |
| H  | -0.690643 | -2.609259 | 3.262103  |
| H  | -0.103014 | -2.254255 | 1.621516  |
| H  | -1.616019 | -3.159299 | 1.852282  |
| C  | -2.980766 | -1.149865 | 3.247128  |
| H  | -2.612727 | -1.400996 | 4.258535  |
| H  | -3.655933 | -1.964326 | 2.937274  |
| H  | -3.579840 | -0.233932 | 3.330285  |
| C  | -2.610947 | 1.546282  | 0.552873  |
| H  | -1.562856 | 1.877143  | 0.377496  |
| C  | -3.565003 | -1.677839 | -0.126948 |
| H  | -3.400536 | -2.437046 | 0.668263  |
| Si | 3.288452  | -3.067818 | 0.706674  |
| Si | 5.245611  | -0.744866 | 1.649250  |
| Si | 2.814573  | 3.112364  | -1.062234 |
| Si | 3.710492  | 0.496910  | -2.548918 |
| C  | 4.811754  | -3.906358 | -0.030376 |
| H  | 4.579722  | -4.981181 | -0.135357 |
| H  | 5.704828  | -3.827877 | 0.607896  |

|   |          |           |           |
|---|----------|-----------|-----------|
| H | 5.071265 | -3.530535 | -1.030019 |
| C | 2.899406 | -3.967368 | 2.326758  |
| H | 2.709019 | -5.037085 | 2.130808  |
| H | 1.994119 | -3.554753 | 2.804029  |
| H | 3.720736 | -3.903440 | 3.057018  |
| C | 1.838009 | -3.494872 | -0.415210 |
| H | 0.883931 | -3.366192 | 0.113782  |
| H | 1.901513 | -4.562739 | -0.688077 |
| H | 1.786589 | -2.925838 | -1.354403 |
| C | 5.829245 | -1.930923 | 3.003369  |
| H | 5.954940 | -2.966897 | 2.655066  |
| H | 5.120008 | -1.946149 | 3.848378  |
| H | 6.803100 | -1.590469 | 3.396315  |
| C | 5.350541 | 0.964813  | 2.442666  |
| H | 6.384534 | 1.125278  | 2.795312  |
| H | 4.688516 | 1.058089  | 3.317717  |
| H | 5.112878 | 1.780886  | 1.744397  |
| C | 6.506701 | -0.754003 | 0.249521  |
| H | 6.603269 | -1.735196 | -0.236835 |
| H | 7.495163 | -0.493668 | 0.667544  |
| H | 6.275337 | -0.011022 | -0.528609 |
| C | 3.248044 | 3.891903  | -2.733377 |
| H | 2.854816 | 4.924567  | -2.710055 |
| H | 2.812677 | 3.394713  | -3.610293 |
| H | 4.336230 | 3.964395  | -2.881354 |
| C | 3.760319 | 4.231601  | 0.149466  |
| H | 4.196636 | 3.697269  | 1.004066  |
| H | 3.109614 | 5.025158  | 0.554878  |
| H | 4.585596 | 4.729373  | -0.387786 |
| C | 0.946579 | 3.298012  | -0.919446 |
| H | 0.670494 | 4.361206  | -1.023447 |
| H | 0.523921 | 2.940145  | 0.031032  |
| H | 0.447376 | 2.737163  | -1.726315 |
| C | 2.286187 | 0.660061  | -3.771679 |
| H | 1.696929 | 1.581323  | -3.665819 |

|    |           |           |           |
|----|-----------|-----------|-----------|
| H  | 1.568308  | -0.178692 | -3.675538 |
| H  | 2.683917  | 0.632808  | -4.803978 |
| C  | 5.275674  | 1.317714  | -3.249779 |
| H  | 5.040394  | 2.120453  | -3.964237 |
| H  | 5.880963  | 0.566080  | -3.784723 |
| H  | 5.912537  | 1.752044  | -2.460911 |
| C  | 4.125029  | -1.336617 | -2.486386 |
| H  | 3.279506  | -1.960919 | -2.173033 |
| H  | 4.978119  | -1.545596 | -1.830274 |
| H  | 4.404136  | -1.654666 | -3.506989 |
| Si | -2.924787 | 2.563169  | 2.161101  |
| Si | -3.450102 | 2.365969  | -0.979778 |
| Si | -3.117243 | -2.767835 | -1.654815 |
| Si | -5.454550 | -1.434661 | 0.052321  |
| C  | -1.720660 | 2.185920  | 3.568106  |
| H  | -1.864775 | 2.962923  | 4.339669  |
| H  | -0.674483 | 2.249436  | 3.237240  |
| H  | -1.873470 | 1.213219  | 4.053575  |
| C  | -2.575635 | 4.388865  | 1.799651  |
| H  | -2.681673 | 4.946000  | 2.747239  |
| H  | -3.262568 | 4.841552  | 1.070104  |
| H  | -1.545628 | 4.545617  | 1.440261  |
| C  | -4.648812 | 2.520731  | 2.928781  |
| H  | -4.657669 | 3.278025  | 3.733233  |
| H  | -4.906477 | 1.556127  | 3.388240  |
| H  | -5.449847 | 2.783470  | 2.223112  |
| C  | -2.460311 | 3.870796  | -1.563475 |
| H  | -3.142986 | 4.594064  | -2.043414 |
| H  | -1.726488 | 3.553517  | -2.320788 |
| H  | -1.914169 | 4.404135  | -0.776146 |
| C  | -3.507946 | 1.245224  | -2.473723 |
| H  | -4.038155 | 1.771370  | -3.288138 |
| H  | -4.023901 | 0.296835  | -2.297532 |
| H  | -2.485627 | 1.022172  | -2.822401 |
| C  | -5.210095 | 2.958594  | -0.618833 |

|   |           |           |           |
|---|-----------|-----------|-----------|
| H | -5.242859 | 3.773748  | 0.121403  |
| H | -5.883009 | 2.160072  | -0.274429 |
| H | -5.627767 | 3.355188  | -1.561134 |
| C | -6.314110 | -0.865209 | -1.527522 |
| H | -6.144502 | 0.202679  | -1.728619 |
| H | -7.402203 | -1.009587 | -1.406493 |
| H | -6.001436 | -1.428860 | -2.419734 |
| C | -5.918650 | -0.219298 | 1.405357  |
| H | -5.622245 | -0.587204 | 2.398651  |
| H | -7.016314 | -0.093283 | 1.414675  |
| H | -5.470048 | 0.768874  | 1.262401  |
| C | -6.230246 | -3.071478 | 0.617753  |
| H | -7.147952 | -2.852308 | 1.190710  |
| H | -5.557091 | -3.639089 | 1.282639  |
| H | -6.508312 | -3.732404 | -0.215242 |
| C | -4.425054 | -4.108658 | -1.932398 |
| H | -5.409182 | -3.717391 | -2.229766 |
| H | -4.563074 | -4.758122 | -1.053601 |
| H | -4.061017 | -4.743837 | -2.759193 |
| C | -1.542204 | -3.746943 | -1.292262 |
| H | -0.635769 | -3.201239 | -1.590440 |
| H | -1.557534 | -4.678656 | -1.884751 |
| H | -1.440158 | -4.034606 | -0.234334 |
| C | -2.884841 | -1.916428 | -3.307139 |
| H | -2.075144 | -1.165693 | -3.298361 |
| H | -3.805407 | -1.447282 | -3.686365 |
| H | -2.586414 | -2.698293 | -4.029248 |

-----  
 --

-----  
 --  
 In=N-[SiiPrDis2]2  
 -----

--

Atomic

Coordinates (Angstroms)

| Number | X         | Y         | Z         |
|--------|-----------|-----------|-----------|
| --     |           |           |           |
| In     | 0.323833  | -1.191965 | -1.824126 |
| N      | -0.033338 | -0.019853 | 0.001772  |
| Si     | -1.677377 | -0.214407 | 0.621994  |
| Si     | 1.585241  | 0.405657  | 0.600576  |
| C      | -2.709090 | -1.316892 | -0.629991 |
| H      | -3.667447 | -1.308018 | -0.068506 |
| C      | -2.810980 | 1.312658  | 1.137038  |
| H      | -2.420232 | 1.418921  | 2.167876  |
| C      | -1.447342 | -1.139402 | 2.338669  |
| H      | -0.391928 | -1.425071 | 2.215568  |
| C      | -2.223311 | -2.441700 | 2.670938  |
| H      | -2.904520 | -2.290717 | 3.520067  |
| H      | -1.535823 | -3.253647 | 2.957970  |
| H      | -2.837143 | -2.814187 | 1.845932  |
| C      | -1.505275 | -0.240552 | 3.595770  |
| H      | -1.084389 | -0.779879 | 4.462381  |
| H      | -2.543961 | 0.017749  | 3.853200  |
| H      | -0.948503 | 0.699261  | 3.497532  |
| C      | 1.444052  | 1.173229  | 2.345087  |
| H      | 0.871773  | 0.391302  | 2.863789  |
| C      | 0.591643  | 2.446235  | 2.368501  |
| H      | 0.375642  | 2.755972  | 3.406144  |
| H      | -0.362496 | 2.299018  | 1.856473  |
| H      | 1.099467  | 3.292759  | 1.880734  |
| C      | 2.716536  | 1.409799  | 3.172546  |
| H      | 2.451421  | 1.578094  | 4.232168  |
| H      | 3.255445  | 2.304501  | 2.832329  |
| H      | 3.419522  | 0.571892  | 3.137743  |
| C      | 2.552274  | -1.317170 | 0.774057  |
| H      | 1.701112  | -1.992120 | 0.542218  |
| C      | 2.356143  | 1.811320  | -0.523742 |
| H      | 1.755286  | 2.621002  | -0.054489 |

|    |           |           |           |
|----|-----------|-----------|-----------|
| Si | -2.644443 | 3.174448  | 0.674175  |
| Si | -4.637254 | 0.955270  | 1.625447  |
| Si | -2.450345 | -3.230810 | -0.759068 |
| Si | -3.375263 | -0.617066 | -2.291909 |
| C  | -4.120417 | 4.025201  | -0.154723 |
| H  | -3.854122 | 5.093727  | -0.253148 |
| H  | -5.042320 | 3.977018  | 0.444169  |
| H  | -4.342453 | 3.651294  | -1.164005 |
| C  | -2.429329 | 4.154289  | 2.291233  |
| H  | -1.909450 | 5.104341  | 2.078186  |
| H  | -1.843161 | 3.622227  | 3.054509  |
| H  | -3.401554 | 4.407908  | 2.740590  |
| C  | -1.169813 | 3.584059  | -0.428167 |
| H  | -0.756503 | 4.562633  | -0.132568 |
| H  | -1.468280 | 3.658785  | -1.483513 |
| H  | -0.370284 | 2.839734  | -0.357763 |
| C  | -5.148555 | 2.178739  | 2.982529  |
| H  | -5.322130 | 3.199993  | 2.611194  |
| H  | -4.396204 | 2.239383  | 3.786123  |
| H  | -6.092835 | 1.831507  | 3.437413  |
| C  | -4.998775 | -0.727461 | 2.408344  |
| H  | -6.078995 | -0.737701 | 2.640058  |
| H  | -4.464832 | -0.885729 | 3.354595  |
| H  | -4.798656 | -1.588712 | 1.756015  |
| C  | -5.960907 | 1.073699  | 0.280388  |
| H  | -5.999533 | 2.039050  | -0.241913 |
| H  | -6.934906 | 0.934604  | 0.783319  |
| H  | -5.874510 | 0.279134  | -0.474143 |
| C  | -2.238606 | -3.949114 | -2.502450 |
| H  | -2.202806 | -5.046586 | -2.377560 |
| H  | -1.296352 | -3.652690 | -2.988858 |
| H  | -3.067806 | -3.724766 | -3.189226 |
| C  | -4.024784 | -4.086530 | -0.144363 |
| H  | -4.336791 | -3.796863 | 0.870386  |
| H  | -3.879565 | -5.180901 | -0.150213 |

|    |           |           |           |
|----|-----------|-----------|-----------|
| H  | -4.862745 | -3.862200 | -0.825041 |
| C  | -0.917157 | -3.884585 | 0.165114  |
| H  | -1.214325 | -4.585313 | 0.961313  |
| H  | -0.319706 | -3.094224 | 0.642274  |
| H  | -0.260267 | -4.433966 | -0.529837 |
| C  | -2.354264 | -0.866374 | -3.872288 |
| H  | -1.530334 | -0.142100 | -3.957590 |
| H  | -3.043884 | -0.642162 | -4.707359 |
| H  | -1.952978 | -1.871395 | -4.046317 |
| C  | -5.048036 | -1.437403 | -2.637618 |
| H  | -4.942577 | -2.490016 | -2.945053 |
| H  | -5.555374 | -0.905752 | -3.461542 |
| H  | -5.720094 | -1.415513 | -1.765018 |
| C  | -3.626706 | 1.242702  | -2.277194 |
| H  | -2.688472 | 1.775324  | -2.071707 |
| H  | -4.369179 | 1.566154  | -1.544281 |
| H  | -3.976434 | 1.559041  | -3.276092 |
| Si | 2.982525  | -2.117772 | 2.481679  |
| Si | 3.861884  | -1.970286 | -0.483491 |
| Si | 1.921588  | 2.306491  | -2.334778 |
| Si | 4.114829  | 2.484646  | -0.104189 |
| C  | 1.683515  | -1.971569 | 3.845617  |
| H  | 2.060800  | -2.566289 | 4.697138  |
| H  | 0.716524  | -2.405455 | 3.554185  |
| H  | 1.511441  | -0.951360 | 4.211438  |
| C  | 3.072791  | -3.996482 | 2.223721  |
| H  | 3.078298  | -4.479102 | 3.217100  |
| H  | 3.980861  | -4.328130 | 1.698343  |
| H  | 2.201168  | -4.385120 | 1.672022  |
| C  | 4.625702  | -1.603898 | 3.291419  |
| H  | 5.227527  | -2.507082 | 3.489970  |
| H  | 4.438443  | -1.117037 | 4.262194  |
| H  | 5.247725  | -0.925667 | 2.695281  |
| C  | 3.304061  | -3.651976 | -1.163554 |
| H  | 3.522844  | -4.483598 | -0.477682 |

|   |           |           |           |
|---|-----------|-----------|-----------|
| H | 3.833921  | -3.853298 | -2.111060 |
| H | 2.223595  | -3.678671 | -1.383672 |
| C | 4.086875  | -0.878755 | -1.993626 |
| H | 4.871993  | -1.318823 | -2.633346 |
| H | 4.391912  | 0.143693  | -1.745240 |
| H | 3.175562  | -0.818584 | -2.605740 |
| C | 5.616584  | -2.225183 | 0.178180  |
| H | 5.681571  | -2.947194 | 1.004617  |
| H | 6.094824  | -1.291007 | 0.505386  |
| H | 6.220565  | -2.625326 | -0.656032 |
| C | 5.281192  | 2.822727  | -1.562661 |
| H | 5.639102  | 1.902682  | -2.050189 |
| H | 6.169208  | 3.319368  | -1.130702 |
| H | 4.879961  | 3.488468  | -2.338982 |
| C | 5.151040  | 1.355422  | 1.007042  |
| H | 5.337223  | 1.815829  | 1.988989  |
| H | 6.130899  | 1.161580  | 0.539958  |
| H | 4.668351  | 0.389206  | 1.185594  |
| C | 3.916425  | 4.167855  | 0.740833  |
| H | 4.904842  | 4.556794  | 1.042682  |
| H | 3.287358  | 4.123252  | 1.643478  |
| H | 3.463859  | 4.906689  | 0.060091  |
| C | 2.005197  | 4.200672  | -2.395058 |
| H | 3.020658  | 4.605676  | -2.270180 |
| H | 1.364913  | 4.652923  | -1.620617 |
| H | 1.632391  | 4.544954  | -3.375675 |
| C | 0.161905  | 1.889236  | -2.924947 |
| H | -0.502775 | 1.533483  | -2.129680 |
| H | 0.195387  | 1.137305  | -3.730507 |
| H | -0.298988 | 2.792696  | -3.357031 |
| C | 2.979650  | 1.666075  | -3.768216 |
| H | 2.681913  | 0.649510  | -4.068375 |
| H | 4.063885  | 1.663958  | -3.607618 |
| H | 2.772133  | 2.327209  | -4.629551 |



--

--

Tbt2-In=N

--

| Atomic<br>Number | Coordinates (Angstroms) |           |           |
|------------------|-------------------------|-----------|-----------|
|                  | X                       | Y         | Z         |
| In               | 0.179339                | 1.265086  | -0.807299 |
| N                | 0.351783                | 2.089650  | -2.705549 |
| C                | -2.719108               | 1.238039  | 0.370505  |
| C                | -3.266424               | -1.368998 | -0.691974 |
| C                | -3.934811               | 0.566213  | 0.645203  |
| C                | -1.784779               | 0.552960  | -0.465454 |
| C                | -2.062640               | -0.722550 | -1.058388 |
| C                | -4.220758               | -0.722820 | 0.133143  |
| H                | -4.718266               | 1.056098  | 1.243676  |
| H                | -3.507103               | -2.351290 | -1.113397 |
| C                | -2.529952               | 2.687151  | 0.792266  |
| H                | -1.449487               | 2.930610  | 0.699332  |
| C                | -5.564982               | -1.349305 | 0.458915  |
| H                | -6.176954               | -0.542565 | 0.924231  |
| C                | -1.166071               | -1.242859 | -2.181088 |
| H                | -0.305755               | -0.554571 | -2.303537 |
| Si               | -0.341335               | -2.957472 | -1.975281 |
| Si               | -2.070449               | -1.003588 | -3.866027 |
| Si               | -6.582011               | -1.828447 | -1.080010 |
| Si               | -5.404489               | -2.608831 | 1.882195  |
| Si               | -3.416126               | 3.852294  | -0.461667 |
| Si               | -2.923739               | 3.124667  | 2.606860  |
| C                | -3.204799               | -2.467384 | -4.220096 |
| H                | -2.638346               | -3.400887 | -4.363043 |
| H                | -3.782437               | -2.284295 | -5.142134 |

|   |           |           |           |
|---|-----------|-----------|-----------|
| H | -3.927399 | -2.634702 | -3.407240 |
| C | -3.034378 | 0.607046  | -3.801289 |
| H | -3.443290 | 0.804996  | -2.794640 |
| H | -3.865875 | 0.621915  | -4.526151 |
| H | -2.353786 | 1.437769  | -4.048102 |
| C | -0.819562 | -0.808821 | -5.257573 |
| H | -0.199972 | 0.075264  | -5.084096 |
| H | -1.362850 | -0.650323 | -6.202801 |
| H | -0.162221 | -1.672214 | -5.393766 |
| C | 1.151763  | -2.804684 | -0.852857 |
| H | 1.935735  | -2.200806 | -1.327945 |
| H | 1.577451  | -3.802833 | -0.662647 |
| H | 0.935123  | -2.338301 | 0.113403  |
| C | 0.377810  | -3.610628 | -3.594783 |
| H | 0.880964  | -4.566662 | -3.368766 |
| H | 1.138873  | -2.934671 | -4.005327 |
| H | -0.368174 | -3.809771 | -4.375925 |
| C | -1.527797 | -4.271191 | -1.335263 |
| H | -2.428622 | -4.361755 | -1.963206 |
| H | -1.850757 | -4.078402 | -0.302508 |
| H | -1.018491 | -5.250845 | -1.346034 |
| C | -6.174868 | -0.632810 | -2.476803 |
| H | -5.142376 | -0.767344 | -2.831367 |
| H | -6.269333 | 0.417351  | -2.144399 |
| H | -6.853219 | -0.778442 | -3.337168 |
| C | -6.253550 | -3.598758 | -1.653751 |
| H | -6.720434 | -3.781222 | -2.638527 |
| H | -6.667466 | -4.339574 | -0.946897 |
| H | -5.174563 | -3.806482 | -1.754757 |
| C | -8.412118 | -1.634931 | -0.652535 |
| H | -9.041823 | -1.777500 | -1.549627 |
| H | -8.615442 | -0.618913 | -0.265055 |
| H | -8.748076 | -2.355926 | 0.111695  |
| C | -7.126402 | -3.137386 | 2.454693  |
| H | -7.775448 | -2.264473 | 2.651693  |

|   |           |           |           |
|---|-----------|-----------|-----------|
| H | -7.063374 | -3.723109 | 3.390348  |
| H | -7.634487 | -3.768648 | 1.704257  |
| C | -4.405432 | -4.130027 | 1.401731  |
| H | -4.197970 | -4.748576 | 2.294717  |
| H | -3.434537 | -3.836301 | 0.973110  |
| H | -4.924322 | -4.765644 | 0.665496  |
| C | -4.511086 | -1.732138 | 3.291693  |
| H | -4.360062 | -2.394656 | 4.163237  |
| H | -5.063746 | -0.839188 | 3.639843  |
| H | -3.517336 | -1.394592 | 2.950326  |
| C | -3.397046 | 5.644331  | 0.145706  |
| H | -3.795335 | 6.291435  | -0.654685 |
| H | -2.369163 | 5.979018  | 0.354953  |
| H | -4.002243 | 5.823777  | 1.047291  |
| C | -2.515915 | 3.869579  | -2.108528 |
| H | -1.623204 | 4.501323  | -2.061247 |
| H | -3.175753 | 4.277348  | -2.894206 |
| H | -2.190453 | 2.865713  | -2.420059 |
| C | -5.196019 | 3.284769  | -0.717713 |
| H | -5.223128 | 2.289872  | -1.195938 |
| H | -5.725326 | 3.995097  | -1.378326 |
| H | -5.764324 | 3.216594  | 0.225793  |
| C | -1.943769 | 4.679316  | 3.070080  |
| H | -1.678550 | 4.663409  | 4.141625  |
| H | -2.528342 | 5.594081  | 2.888932  |
| H | -1.005377 | 4.768661  | 2.502034  |
| C | -2.412713 | 1.676406  | 3.684679  |
| H | -3.092428 | 0.821016  | 3.534082  |
| H | -2.417361 | 1.934645  | 4.758091  |
| H | -1.401549 | 1.340896  | 3.414389  |
| C | -4.748708 | 3.470301  | 2.958217  |
| H | -5.388448 | 2.591842  | 2.760871  |
| H | -5.148987 | 4.316837  | 2.376648  |
| H | -4.862634 | 3.723613  | 4.028919  |
| C | 3.038566  | 0.758680  | -0.507416 |

|    |           |           |           |
|----|-----------|-----------|-----------|
| C  | 3.015359  | -1.086210 | 1.614707  |
| C  | 1.869801  | 0.666241  | 0.325570  |
| C  | 4.110610  | -0.141005 | -0.301831 |
| C  | 4.133273  | -1.059118 | 0.762056  |
| C  | 1.894777  | -0.249317 | 1.440809  |
| H  | 4.985783  | -0.057618 | -0.947891 |
| H  | 3.055138  | -1.738403 | 2.486251  |
| C  | 3.350731  | 1.913078  | -1.485426 |
| H  | 4.457840  | 1.991405  | -1.383678 |
| C  | 0.845061  | -0.200090 | 2.543456  |
| H  | -0.061298 | 0.285122  | 2.112234  |
| C  | 5.361984  | -1.890524 | 1.055824  |
| H  | 5.286039  | -2.230774 | 2.107362  |
| Si | 6.976520  | -0.869334 | 1.007982  |
| Si | 5.329215  | -3.524292 | 0.069607  |
| Si | 0.158135  | -1.827441 | 3.289326  |
| Si | 1.566591  | 1.071863  | 3.814784  |
| Si | 3.007562  | 3.670595  | -0.828404 |
| Si | 3.340719  | 1.527635  | -3.395640 |
| C  | 4.001135  | -4.608393 | 0.856073  |
| H  | 4.332525  | -4.964619 | 1.846744  |
| H  | 3.780339  | -5.496064 | 0.239379  |
| H  | 3.061746  | -4.052648 | 0.995558  |
| C  | 6.970551  | -4.444379 | 0.205807  |
| H  | 7.249383  | -4.617317 | 1.258039  |
| H  | 7.800000  | -3.905910 | -0.278558 |
| H  | 6.887363  | -5.431319 | -0.281026 |
| C  | 4.943760  | -3.217949 | -1.744988 |
| H  | 4.865032  | -4.175357 | -2.286422 |
| H  | 5.726987  | -2.618784 | -2.234547 |
| H  | 3.991168  | -2.686444 | -1.865576 |
| C  | 7.707863  | -0.731938 | -0.728181 |
| H  | 7.903935  | -1.720193 | -1.172557 |
| H  | 8.666316  | -0.185704 | -0.691476 |
| H  | 7.048020  | -0.183233 | -1.418872 |

|   |           |           |          |
|---|-----------|-----------|----------|
| C | 8.235272  | -1.692178 | 2.145753 |
| H | 8.627342  | -2.634838 | 1.734703 |
| H | 7.788153  | -1.913602 | 3.130050 |
| H | 9.092548  | -1.018745 | 2.317465 |
| C | 6.642583  | 0.866097  | 1.661825 |
| H | 6.309571  | 0.837400  | 2.712036 |
| H | 5.857884  | 1.373239  | 1.081315 |
| H | 7.556082  | 1.483584  | 1.614921 |
| C | -1.050863 | -1.518727 | 4.713181 |
| H | -1.765440 | -0.703103 | 4.533835 |
| H | -0.538247 | -1.316518 | 5.665594 |
| H | -1.641602 | -2.443328 | 4.849083 |
| C | -0.828371 | -2.797390 | 2.004876 |
| H | -1.600854 | -3.399126 | 2.515880 |
| H | -0.208296 | -3.490703 | 1.418535 |
| H | -1.345471 | -2.120036 | 1.300868 |
| C | 1.489391  | -2.949367 | 4.036022 |
| H | 2.172151  | -2.391641 | 4.701077 |
| H | 2.097121  | -3.472428 | 3.280866 |
| H | 0.995238  | -3.722299 | 4.652709 |
| C | 1.198387  | 2.794989  | 3.147041 |
| H | 1.924506  | 3.536178  | 3.517888 |
| H | 0.196585  | 3.121026  | 3.458260 |
| H | 1.237433  | 2.809539  | 2.048650 |
| C | 0.878975  | 0.987162  | 5.569810 |
| H | 1.175216  | 0.060590  | 6.088632 |
| H | -0.215974 | 1.075964  | 5.618547 |
| H | 1.311837  | 1.832397  | 6.135755 |
| C | 3.429757  | 0.850108  | 3.995649 |
| H | 3.966168  | 1.032047  | 3.054846 |
| H | 3.692737  | -0.165792 | 4.335801 |
| H | 3.806409  | 1.562889  | 4.750277 |
| C | 3.788212  | 3.735790  | 0.887488 |
| H | 3.501352  | 2.862314  | 1.489061 |
| H | 3.497207  | 4.642369  | 1.440344 |

|   |          |           |           |
|---|----------|-----------|-----------|
| H | 4.887809 | 3.732225  | 0.801696  |
| C | 3.946034 | 4.887683  | -1.923831 |
| H | 3.522729 | 4.960607  | -2.934742 |
| H | 5.007652 | 4.605590  | -2.022272 |
| H | 3.911135 | 5.893282  | -1.474960 |
| C | 1.225643 | 4.286496  | -0.789294 |
| H | 1.241506 | 5.356164  | -0.540082 |
| H | 0.591331 | 3.810464  | -0.036272 |
| H | 0.764680 | 4.169542  | -1.770154 |
| C | 5.187271 | 1.561651  | -3.844343 |
| H | 5.600147 | 2.578595  | -3.703636 |
| H | 5.345202 | 1.289531  | -4.903175 |
| H | 5.787733 | 0.871084  | -3.226420 |
| C | 2.537538 | 2.720871  | -4.630504 |
| H | 2.435215 | 3.745263  | -4.247187 |
| H | 1.534995 | 2.389770  | -4.917220 |
| H | 3.170377 | 2.763768  | -5.535304 |
| C | 2.709524 | -0.218937 | -3.712647 |
| H | 3.271460 | -0.954146 | -3.121825 |
| H | 2.850546 | -0.459605 | -4.776125 |
| H | 1.649112 | -0.334025 | -3.492757 |

-----  
--

-----  
--

In=N-Tbt2

-----  
--

| Atomic<br>Number | Coordinates (Angstroms) |           |           |
|------------------|-------------------------|-----------|-----------|
|                  | X                       | Y         | Z         |
| C                | -2.280434               | 0.991932  | 0.734469  |
| C                | -2.856217               | -1.184384 | -0.961963 |
| C                | -3.535406               | 0.341780  | 0.738791  |

-----  
--

|    |           |           |           |
|----|-----------|-----------|-----------|
| C  | -1.196117 | 0.419452  | -0.037231 |
| C  | -1.574624 | -0.581897 | -1.023549 |
| C  | -3.855028 | -0.769547 | -0.058295 |
| H  | -4.319233 | 0.753784  | 1.375289  |
| H  | -3.098980 | -1.947094 | -1.700958 |
| C  | -2.220002 | 2.323170  | 1.486700  |
| H  | -1.177991 | 2.684358  | 1.495636  |
| C  | -5.246841 | -1.379439 | 0.040999  |
| H  | -5.826831 | -0.698060 | 0.696901  |
| C  | -0.759475 | -0.823425 | -2.295952 |
| H  | 0.185807  | -0.257621 | -2.217072 |
| Si | -0.129525 | -2.594550 | -2.655485 |
| Si | -1.699986 | -0.126107 | -3.833378 |
| Si | -6.313260 | -1.412566 | -1.540348 |
| Si | -5.253392 | -2.994570 | 1.058063  |
| Si | -3.293610 | 3.715764  | 0.672976  |
| Si | -2.715345 | 2.256275  | 3.352480  |
| C  | -2.847653 | -1.397167 | -4.633289 |
| H  | -2.306038 | -2.260033 | -5.048516 |
| H  | -3.382847 | -0.910142 | -5.467123 |
| H  | -3.609001 | -1.780834 | -3.939511 |
| C  | -2.759511 | 1.377254  | -3.400732 |
| H  | -3.209383 | 1.313760  | -2.399817 |
| H  | -3.575933 | 1.482552  | -4.135086 |
| H  | -2.161704 | 2.300786  | -3.457838 |
| C  | -0.500388 | 0.479574  | -5.161464 |
| H  | 0.129902  | 1.302087  | -4.787442 |
| H  | -1.085170 | 0.877252  | -6.009943 |
| H  | 0.163911  | -0.302926 | -5.552071 |
| C  | 1.273401  | -2.987165 | -1.498295 |
| H  | 2.121142  | -2.312061 | -1.674434 |
| H  | 1.619267  | -4.018898 | -1.662826 |
| H  | 1.002825  | -2.868689 | -0.446082 |
| C  | 0.624109  | -2.723879 | -4.386618 |
| H  | 1.082837  | -3.725360 | -4.472485 |

|   |           |           |           |
|---|-----------|-----------|-----------|
| H | 1.428368  | -1.986686 | -4.540329 |
| H | -0.097012 | -2.624395 | -5.211492 |
| C | -1.451593 | -3.931198 | -2.517418 |
| H | -2.331567 | -3.746955 | -3.151001 |
| H | -1.796497 | -4.059543 | -1.482885 |
| H | -1.011904 | -4.892263 | -2.837719 |
| C | -5.950563 | 0.076055  | -2.629523 |
| H | -4.977553 | -0.011590 | -3.126755 |
| H | -5.949097 | 1.015368  | -2.053253 |
| H | -6.722877 | 0.163504  | -3.413568 |
| C | -6.076298 | -2.980727 | -2.564422 |
| H | -6.565458 | -2.870338 | -3.547678 |
| H | -6.524611 | -3.857409 | -2.069326 |
| H | -5.014329 | -3.209077 | -2.744459 |
| C | -8.131177 | -1.293041 | -1.035580 |
| H | -8.753616 | -1.085884 | -1.923678 |
| H | -8.294324 | -0.467809 | -0.320900 |
| H | -8.512029 | -2.215239 | -0.572206 |
| C | -7.020011 | -3.560934 | 1.415119  |
| H | -7.649029 | -2.742052 | 1.801959  |
| H | -7.000697 | -4.355049 | 2.182148  |
| H | -7.518901 | -3.978269 | 0.525733  |
| C | -4.343890 | -4.402013 | 0.206859  |
| H | -4.237806 | -5.254834 | 0.899848  |
| H | -3.334345 | -4.099480 | -0.098687 |
| H | -4.876217 | -4.761515 | -0.686175 |
| C | -4.427348 | -2.596176 | 2.696659  |
| H | -4.366277 | -3.480518 | 3.352090  |
| H | -4.985098 | -1.813697 | 3.239029  |
| H | -3.406844 | -2.225539 | 2.533056  |
| C | -3.222302 | 5.276914  | 1.740251  |
| H | -3.682368 | 6.106308  | 1.175478  |
| H | -2.180593 | 5.565773  | 1.957190  |
| H | -3.753719 | 5.196544  | 2.698347  |
| C | -2.782495 | 4.359129  | -1.028333 |



|    |           |           |           |
|----|-----------|-----------|-----------|
| H  | -1.803778 | 4.864486  | -1.039139 |
| H  | -3.536556 | 5.120956  | -1.300326 |
| H  | -2.801052 | 3.601931  | -1.823501 |
| C  | -5.086090 | 3.188468  | 0.397610  |
| H  | -5.141464 | 2.403698  | -0.372676 |
| H  | -5.650032 | 4.061124  | 0.023203  |
| H  | -5.601006 | 2.818177  | 1.293073  |
| C  | -1.773029 | 3.608533  | 4.286428  |
| H  | -1.562630 | 3.279420  | 5.318393  |
| H  | -2.360048 | 4.536894  | 4.353147  |
| H  | -0.810672 | 3.855787  | 3.814140  |
| C  | -2.364971 | 0.566534  | 4.078440  |
| H  | -2.997795 | -0.193042 | 3.598367  |
| H  | -2.595814 | 0.567956  | 5.157283  |
| H  | -1.323573 | 0.260202  | 3.956589  |
| C  | -4.551375 | 2.520015  | 3.739484  |
| H  | -5.193221 | 1.732769  | 3.312822  |
| H  | -4.952409 | 3.494587  | 3.426707  |
| H  | -4.659012 | 2.459894  | 4.837556  |
| C  | 2.590571  | 0.810357  | -0.293838 |
| C  | 2.630399  | -1.553639 | 1.184079  |
| C  | 1.324914  | 0.343650  | 0.260273  |
| C  | 3.732648  | -0.021087 | -0.228000 |
| C  | 3.793182  | -1.236148 | 0.468437  |
| C  | 1.447580  | -0.780690 | 1.181299  |
| H  | 4.643485  | 0.348397  | -0.703307 |
| H  | 2.676724  | -2.395382 | 1.871226  |
| C  | 2.946049  | 2.222162  | -0.839766 |
| H  | 4.045933  | 2.200786  | -0.677232 |
| C  | 0.507846  | -1.037998 | 2.369462  |
| H  | -0.436773 | -0.491874 | 2.218191  |
| C  | 5.069898  | -2.062978 | 0.601312  |
| H  | 4.968475  | -2.653679 | 1.534668  |
| Si | 6.678357  | -1.077138 | 0.888725  |
| Si | 5.194714  | -3.405970 | -0.750286 |

|    |           |           |           |
|----|-----------|-----------|-----------|
| Si | -0.039115 | -2.837019 | 2.739880  |
| Si | 1.389602  | -0.207546 | 3.884105  |
| Si | 2.854846  | 3.703602  | 0.378858  |
| Si | 3.213728  | 2.461427  | -2.750992 |
| C  | 3.959249  | -4.764864 | -0.315414 |
| H  | 4.376138  | -5.396399 | 0.488564  |
| H  | 3.746310  | -5.421187 | -1.176624 |
| H  | 3.005603  | -4.351952 | 0.039287  |
| C  | 6.881436  | -4.260799 | -0.800634 |
| H  | 7.146635  | -4.696523 | 0.176493  |
| H  | 7.702637  | -3.595514 | -1.109605 |
| H  | 6.838944  | -5.090587 | -1.528631 |
| C  | 4.896548  | -2.656769 | -2.454085 |
| H  | 4.876274  | -3.442743 | -3.228579 |
| H  | 5.705118  | -1.953879 | -2.714359 |
| H  | 3.947967  | -2.105461 | -2.507090 |
| C  | 7.453925  | -0.447037 | -0.717125 |
| H  | 7.735562  | -1.268847 | -1.394448 |
| H  | 8.371310  | 0.124829  | -0.491756 |
| H  | 6.778874  | 0.222926  | -1.273204 |
| C  | 7.935104  | -2.179423 | 1.773188  |
| H  | 8.425833  | -2.897032 | 1.099833  |
| H  | 7.461006  | -2.753466 | 2.587995  |
| H  | 8.723700  | -1.554343 | 2.227237  |
| C  | 6.376739  | 0.407706  | 2.005248  |
| H  | 6.055238  | 0.092303  | 3.010486  |
| H  | 5.600529  | 1.070591  | 1.600890  |
| H  | 7.306248  | 0.993144  | 2.117291  |
| C  | -1.229372 | -2.913548 | 4.211150  |
| H  | -1.905497 | -2.054327 | 4.295458  |
| H  | -0.687746 | -3.006439 | 5.163606  |
| H  | -1.855033 | -3.815448 | 4.101529  |
| C  | -0.933871 | -3.592464 | 1.264675  |
| H  | -1.660398 | -4.341323 | 1.617547  |
| H  | -0.245351 | -4.102640 | 0.577604  |

|   |           |           |           |
|---|-----------|-----------|-----------|
| H | -1.480276 | -2.829104 | 0.691641  |
| C | 1.369430  | -4.003497 | 3.237177  |
| H | 2.006963  | -3.574379 | 4.027689  |
| H | 2.017222  | -4.299398 | 2.397932  |
| H | 0.924179  | -4.927792 | 3.646832  |
| C | 1.143793  | 1.658201  | 3.771314  |
| H | 2.001362  | 2.195343  | 4.207289  |
| H | 0.250189  | 1.958683  | 4.332190  |
| H | 1.024630  | 1.990109  | 2.730836  |
| C | 0.783320  | -0.739841 | 5.599232  |
| H | 1.086777  | -1.770500 | 5.843628  |
| H | -0.302080 | -0.661392 | 5.746700  |
| H | 1.269764  | -0.076351 | 6.337298  |
| C | 3.243566  | -0.547819 | 3.947097  |
| H | 3.775890  | -0.119520 | 3.089626  |
| H | 3.480422  | -1.622554 | 3.984042  |
| H | 3.643486  | -0.088059 | 4.869102  |
| C | 3.750425  | 3.155865  | 1.941913  |
| H | 3.446888  | 2.152483  | 2.267574  |
| H | 3.562647  | 3.856461  | 2.772547  |
| H | 4.838173  | 3.135890  | 1.764987  |
| C | 3.874609  | 5.122124  | -0.344432 |
| H | 3.470429  | 5.534948  | -1.281615 |
| H | 4.915831  | 4.812164  | -0.531903 |
| H | 3.908304  | 5.945232  | 0.390948  |
| C | 1.191950  | 4.446785  | 0.884675  |
| H | 1.393031  | 5.211431  | 1.656703  |
| H | 0.512716  | 3.706191  | 1.328796  |
| H | 0.666143  | 4.958336  | 0.061091  |
| C | 5.059333  | 2.810221  | -2.978614 |
| H | 5.340798  | 3.801080  | -2.587234 |
| H | 5.313147  | 2.798225  | -4.053017 |
| H | 5.691113  | 2.056907  | -2.479273 |
| C | 2.341829  | 3.907244  | -3.625937 |
| H | 2.122291  | 4.744816  | -2.944500 |

|    |           |          |           |
|----|-----------|----------|-----------|
| H  | 1.392919  | 3.619530 | -4.103053 |
| H  | 3.010943  | 4.292450 | -4.416652 |
| C  | 2.839070  | 0.831147 | -3.611433 |
| H  | 3.570813  | 0.067409 | -3.305960 |
| H  | 2.896981  | 0.945291 | -4.707073 |
| H  | 1.841400  | 0.440249 | -3.366434 |
| In | -0.000670 | 2.618419 | -1.528255 |
| N  | 0.119375  | 1.031686 | -0.041875 |

-----  
--

-----  
--

Tbt2-In≡N-Tbt2

-----  
--

| Atomic<br>Number | Coordinates (Angstroms) |   |   |
|------------------|-------------------------|---|---|
|                  | X                       | Y | Z |

-----  
--

|    |           |           |           |
|----|-----------|-----------|-----------|
| C  | -3.030948 | 1.291197  | -0.073561 |
| C  | -3.789352 | -1.439291 | -0.269406 |
| C  | -4.207694 | 0.811525  | 0.536811  |
| C  | -2.230082 | 0.351352  | -0.778930 |
| C  | -2.611992 | -1.011968 | -0.920509 |
| C  | -4.582950 | -0.546479 | 0.483091  |
| H  | -4.848305 | 1.502283  | 1.086988  |
| H  | -4.087822 | -2.485231 | -0.341318 |
| C  | -2.659088 | 2.768553  | -0.016157 |
| H  | -1.558232 | 2.866958  | -0.154167 |
| C  | -5.821490 | -1.009170 | 1.218661  |
| H  | -6.261975 | -0.113727 | 1.702272  |
| C  | -1.789094 | -1.985028 | -1.754379 |
| H  | -0.842873 | -1.471669 | -2.044814 |
| Si | -1.151790 | -3.535885 | -0.831817 |
| Si | -2.594077 | -2.264538 | -3.462624 |

|    |           |           |           |
|----|-----------|-----------|-----------|
| Si | -7.190626 | -1.572280 | 0.018564  |
| Si | -5.383149 | -2.111041 | 2.712460  |
| Si | -3.392559 | 3.672646  | -1.539724 |
| Si | -2.917818 | 3.652543  | 1.661760  |
| C  | -4.293421 | -3.059287 | -3.327393 |
| H  | -4.254058 | -4.052559 | -2.855388 |
| H  | -4.727872 | -3.183935 | -4.334309 |
| H  | -4.984174 | -2.433831 | -2.743613 |
| C  | -2.777511 | -0.577644 | -4.278202 |
| H  | -3.452430 | 0.065597  | -3.691978 |
| H  | -3.191873 | -0.668641 | -5.296545 |
| H  | -1.806437 | -0.060189 | -4.357846 |
| C  | -1.481360 | -3.345017 | -4.534740 |
| H  | -0.445664 | -2.969307 | -4.557552 |
| H  | -1.855893 | -3.353444 | -5.573022 |
| H  | -1.451927 | -4.389927 | -4.186031 |
| C  | 0.458772  | -4.134691 | -1.604998 |
| H  | 0.350680  | -4.440616 | -2.655789 |
| H  | 0.829602  | -5.006222 | -1.038298 |
| H  | 1.242598  | -3.363730 | -1.559311 |
| C  | -2.382291 | -4.965096 | -0.851545 |
| H  | -2.004126 | -5.784417 | -0.215675 |
| H  | -2.512066 | -5.372509 | -1.867593 |
| H  | -3.375947 | -4.685998 | -0.470252 |
| C  | -0.761088 | -3.012728 | 0.924432  |
| H  | -1.644830 | -2.632280 | 1.457664  |
| H  | -0.006469 | -2.208830 | 0.919590  |
| H  | -0.339798 | -3.848876 | 1.505867  |
| C  | -7.091593 | -0.474871 | -1.511292 |
| H  | -6.105857 | -0.543598 | -1.996571 |
| H  | -7.250632 | 0.582701  | -1.241785 |
| H  | -7.859594 | -0.753789 | -2.252637 |
| C  | -7.033051 | -3.385032 | -0.475322 |
| H  | -7.728910 | -3.619773 | -1.299101 |
| H  | -7.281041 | -4.049525 | 0.368688  |

|   |           |           |           |
|---|-----------|-----------|-----------|
| H | -6.019735 | -3.641541 | -0.818758 |
| C | -8.868963 | -1.304879 | 0.837011  |
| H | -9.682621 | -1.436695 | 0.102890  |
| H | -8.953502 | -0.282811 | 1.244795  |
| H | -9.047678 | -2.009760 | 1.664382  |
| C | -6.941530 | -2.410638 | 3.732472  |
| H | -7.483146 | -1.471590 | 3.935839  |
| H | -6.685366 | -2.865206 | 4.705035  |
| H | -7.639726 | -3.094494 | 3.222501  |
| C | -4.633142 | -3.773601 | 2.240214  |
| H | -4.411628 | -4.348240 | 3.156706  |
| H | -3.685410 | -3.651406 | 1.696494  |
| H | -5.306328 | -4.383992 | 1.619600  |
| C | -4.116696 | -1.175554 | 3.748656  |
| H | -3.840763 | -1.745531 | 4.652608  |
| H | -4.502120 | -0.195348 | 4.076166  |
| H | -3.195055 | -0.993421 | 3.172720  |
| C | -3.208282 | 5.544317  | -1.410149 |
| H | -3.535515 | 6.005912  | -2.358127 |
| H | -2.159137 | 5.837621  | -1.244316 |
| H | -3.812298 | 5.983600  | -0.601422 |
| C | -2.433321 | 3.139300  | -3.072862 |
| H | -1.373593 | 3.443318  | -3.003441 |
| H | -2.846926 | 3.616361  | -3.978412 |
| H | -2.471835 | 2.051228  | -3.226686 |
| C | -5.205180 | 3.206471  | -1.722711 |
| H | -5.316931 | 2.126612  | -1.904932 |
| H | -5.664152 | 3.745835  | -2.568710 |
| H | -5.780579 | 3.450709  | -0.815292 |
| C | -1.859276 | 5.219637  | 1.701683  |
| H | -1.471012 | 5.385913  | 2.720539  |
| H | -2.438415 | 6.111302  | 1.415614  |
| H | -0.987985 | 5.161274  | 1.032059  |
| C | -2.348288 | 2.499243  | 3.028684  |
| H | -2.968695 | 1.593651  | 3.093838  |

|    |           |           |           |
|----|-----------|-----------|-----------|
| H  | -2.380099 | 3.004525  | 4.008839  |
| H  | -1.309978 | 2.177469  | 2.855764  |
| C  | -4.709856 | 4.169831  | 1.964737  |
| H  | -5.412565 | 3.322135  | 1.989053  |
| H  | -5.064569 | 4.876966  | 1.197337  |
| H  | -4.779789 | 4.682913  | 2.940084  |
| C  | 3.507456  | 0.566080  | -0.860136 |
| C  | 3.624098  | -0.483041 | 1.748780  |
| C  | 2.439808  | 0.845502  | 0.062034  |
| C  | 4.502084  | -0.357234 | -0.490072 |
| C  | 4.565225  | -0.924710 | 0.799252  |
| C  | 2.562038  | 0.380112  | 1.430874  |
| H  | 5.265501  | -0.619431 | -1.227323 |
| H  | 3.726043  | -0.848980 | 2.771972  |
| C  | 3.625757  | 1.247309  | -2.221624 |
| H  | 4.690966  | 1.094023  | -2.495509 |
| C  | 1.614194  | 0.887662  | 2.515058  |
| H  | 0.621183  | 1.051470  | 2.050962  |
| C  | 5.629448  | -1.932397 | 1.185969  |
| H  | 5.542697  | -2.098438 | 2.279111  |
| Si | 7.386316  | -1.230504 | 0.980978  |
| Si | 5.227714  | -3.642550 | 0.457677  |
| Si | 1.338288  | -0.218582 | 4.050233  |
| Si | 2.198584  | 2.655071  | 3.010061  |
| Si | 3.604040  | 3.158836  | -2.202452 |
| Si | 2.813083  | 0.426624  | -3.740370 |
| C  | 3.541646  | -4.177873 | 1.117658  |
| H  | 3.537304  | -4.236030 | 2.219167  |
| H  | 3.260765  | -5.171893 | 0.728010  |
| H  | 2.756702  | -3.464902 | 0.819474  |
| C  | 6.525481  | -4.904704 | 0.996807  |
| H  | 6.667416  | -4.898738 | 2.090769  |
| H  | 7.505424  | -4.706361 | 0.531841  |
| H  | 6.220102  | -5.924708 | 0.705237  |
| C  | 5.128457  | -3.632926 | -1.423980 |

|   |           |           |           |
|---|-----------|-----------|-----------|
| H | 4.935723  | -4.653830 | -1.798047 |
| H | 6.054410  | -3.269165 | -1.894944 |
| H | 4.301856  | -2.991279 | -1.764061 |
| C | 8.102877  | -1.517888 | -0.742920 |
| H | 8.221199  | -2.592133 | -0.961149 |
| H | 9.099609  | -1.050214 | -0.823094 |
| H | 7.469845  | -1.081404 | -1.532308 |
| C | 8.517912  | -2.052664 | 2.249360  |
| H | 8.661582  | -3.125728 | 2.044861  |
| H | 8.099214  | -1.959709 | 3.266479  |
| H | 9.513288  | -1.575505 | 2.255401  |
| C | 7.325533  | 0.621263  | 1.324307  |
| H | 6.878495  | 0.823585  | 2.312034  |
| H | 6.708409  | 1.143994  | 0.576913  |
| H | 8.336235  | 1.064129  | 1.309682  |
| C | -0.271109 | 0.249478  | 4.923354  |
| H | -1.138805 | 0.110247  | 4.259611  |
| H | -0.298482 | 1.281810  | 5.298202  |
| H | -0.412347 | -0.423047 | 5.788156  |
| C | 1.140871  | -2.049899 | 3.647943  |
| H | 1.242472  | -2.637196 | 4.577736  |
| H | 1.874941  | -2.429020 | 2.923988  |
| H | 0.136564  | -2.247018 | 3.247396  |
| C | 2.741718  | -0.085230 | 5.313958  |
| H | 2.868292  | 0.934166  | 5.708675  |
| H | 3.713189  | -0.401907 | 4.902589  |
| H | 2.516035  | -0.744850 | 6.170616  |
| C | 1.744703  | 3.915065  | 1.688561  |
| H | 2.343392  | 3.799497  | 0.778942  |
| H | 1.886962  | 4.939775  | 2.075229  |
| H | 0.691591  | 3.798695  | 1.396617  |
| C | 1.379826  | 3.312988  | 4.587311  |
| H | 1.572449  | 2.711159  | 5.487636  |
| H | 0.288225  | 3.406251  | 4.468848  |
| H | 1.773581  | 4.327607  | 4.777175  |



|    |           |           |           |
|----|-----------|-----------|-----------|
| C  | 4.066090  | 2.641610  | 3.255078  |
| H  | 4.582218  | 2.319623  | 2.338347  |
| H  | 4.369834  | 1.956240  | 4.061303  |
| H  | 4.428531  | 3.651225  | 3.515186  |
| C  | 4.659743  | 3.691242  | -0.734213 |
| H  | 4.340929  | 3.194788  | 0.192751  |
| H  | 4.620872  | 4.781523  | -0.571462 |
| H  | 5.713509  | 3.413177  | -0.908992 |
| C  | 4.505147  | 3.719499  | -3.774596 |
| H  | 3.925604  | 3.516582  | -4.690653 |
| H  | 5.487994  | 3.231010  | -3.885481 |
| H  | 4.678773  | 4.809386  | -3.736942 |
| C  | 1.952658  | 4.073454  | -2.218217 |
| H  | 1.396397  | 3.922281  | -1.284849 |
| H  | 1.319205  | 3.739331  | -3.054794 |
| H  | 2.138730  | 5.154242  | -2.356115 |
| C  | 4.168127  | 0.210149  | -5.041707 |
| H  | 4.569066  | 1.181362  | -5.374999 |
| H  | 3.789984  | -0.319848 | -5.933193 |
| H  | 5.012107  | -0.375411 | -4.637279 |
| C  | 1.413373  | 1.379278  | -4.590612 |
| H  | 1.744071  | 2.364664  | -4.955655 |
| H  | 0.535247  | 1.548262  | -3.944346 |
| H  | 1.068096  | 0.802243  | -5.467245 |
| C  | 2.162245  | -1.289157 | -3.313045 |
| H  | 2.978461  | -1.952866 | -2.990418 |
| H  | 1.675504  | -1.753155 | -4.188579 |
| H  | 1.425676  | -1.263234 | -2.492670 |
| In | -0.215184 | 0.846172  | -1.143684 |
| N  | 1.337473  | 1.584816  | -0.330550 |

-----

--

-----

--

Ar\*2-In=N

| Atomic<br>Number | Coordinates (Angstroms) |           |           |
|------------------|-------------------------|-----------|-----------|
|                  | X                       | Y         | Z         |
| In               | -0.133668               | -0.664092 | -0.156751 |
| N                | -1.973340               | -2.191737 | -0.129949 |
| H                | 3.014833                | -0.447633 | -4.451495 |
| C                | 2.123719                | -0.003698 | -4.001778 |
| C                | -0.149591               | 1.129054  | -2.802426 |
| C                | 1.832538                | -0.296499 | -2.648258 |
| C                | 1.299559                | 0.833276  | -4.760348 |
| C                | 0.192068                | 1.422529  | -4.142287 |
| C                | 0.633472                | 0.199723  | -2.045880 |
| H                | 1.529577                | 1.041666  | -5.809398 |
| H                | -0.433441               | 2.124606  | -4.697270 |
| C                | 2.901978                | -1.108834 | -1.960654 |
| C                | 5.128378                | -2.677618 | -1.115839 |
| C                | 2.804042                | -2.525772 | -1.905093 |
| C                | 4.129175                | -0.478385 | -1.595925 |
| C                | 5.213333                | -1.278912 | -1.190630 |
| C                | 3.907001                | -3.279234 | -1.460342 |
| H                | 6.159744                | -0.799679 | -0.925764 |
| H                | 3.821920                | -4.367054 | -1.429769 |
| C                | -1.331653               | 1.907446  | -2.280923 |
| C                | -3.606159               | 3.505566  | -1.622275 |
| C                | -2.652628               | 1.406805  | -2.484686 |
| C                | -1.159086               | 3.241449  | -1.800683 |
| C                | -2.302195               | 3.992591  | -1.456485 |
| C                | -3.754064               | 2.215703  | -2.151497 |
| H                | -2.151810               | 5.006763  | -1.076045 |
| H                | -4.763045               | 1.826248  | -2.300290 |
| C                | 1.589507                | -3.250498 | -2.476503 |
| H                | 0.741988                | -2.546557 | -2.495590 |

|   |           |           |           |
|---|-----------|-----------|-----------|
| C | 1.165613  | -4.467941 | -1.645911 |
| H | 1.937845  | -5.253979 | -1.640986 |
| H | 0.253351  | -4.909209 | -2.071357 |
| H | 0.954930  | -4.187888 | -0.603637 |
| C | 1.872556  | -3.664734 | -3.938263 |
| H | 2.136619  | -2.794142 | -4.556949 |
| H | 0.986653  | -4.149526 | -4.381123 |
| H | 2.712233  | -4.378989 | -3.977354 |
| C | 4.329953  | 1.032526  | -1.708132 |
| H | 3.334963  | 1.490719  | -1.758701 |
| C | 5.053925  | 1.638287  | -0.492559 |
| H | 6.101348  | 1.298356  | -0.428043 |
| H | 4.548976  | 1.382913  | 0.446316  |
| H | 5.074859  | 2.736004  | -0.579969 |
| C | 5.087978  | 1.403706  | -3.001723 |
| H | 4.554018  | 1.060059  | -3.898391 |
| H | 6.093028  | 0.948719  | -3.006437 |
| H | 5.207737  | 2.498127  | -3.072901 |
| C | 6.351730  | -3.509301 | -0.749002 |
| H | 7.131960  | -2.805475 | -0.408028 |
| C | 6.080662  | -4.501734 | 0.398016  |
| H | 5.328780  | -5.254011 | 0.108426  |
| H | 5.709226  | -3.982236 | 1.294652  |
| H | 7.003698  | -5.041882 | 0.667736  |
| C | 6.896040  | -4.241562 | -1.995645 |
| H | 7.109827  | -3.529150 | -2.808501 |
| H | 6.159617  | -4.970690 | -2.372565 |
| H | 7.824164  | -4.788093 | -1.756868 |
| C | -2.912126 | 0.060222  | -3.161151 |
| H | -2.053110 | -0.597682 | -2.956615 |
| C | -3.015043 | 0.244004  | -4.694104 |
| H | -3.842181 | 0.931916  | -4.938903 |
| H | -3.219401 | -0.724650 | -5.180648 |
| H | -2.091170 | 0.654411  | -5.124020 |
| C | -4.181306 | -0.647714 | -2.650493 |

|   |           |           |           |
|---|-----------|-----------|-----------|
| H | -4.219306 | -0.691542 | -1.554299 |
| H | -4.200130 | -1.682998 | -3.023044 |
| H | -5.093521 | -0.149173 | -3.021223 |
| C | -4.832946 | 4.360741  | -1.327859 |
| H | -5.700965 | 3.678253  | -1.301676 |
| C | -5.062134 | 5.368088  | -2.476633 |
| H | -5.139747 | 4.848468  | -3.444898 |
| H | -4.220081 | 6.077616  | -2.541464 |
| H | -5.986540 | 5.947934  | -2.314084 |
| C | -4.763012 | 5.085556  | 0.029131  |
| H | -3.941665 | 5.819758  | 0.052532  |
| H | -4.605913 | 4.375713  | 0.855130  |
| H | -5.700186 | 5.634472  | 0.219416  |
| C | 0.153204  | 4.040014  | -1.769801 |
| H | -0.020457 | 4.841299  | -1.031172 |
| C | 0.369276  | 4.759441  | -3.123337 |
| H | 1.204823  | 5.475651  | -3.043780 |
| H | -0.534435 | 5.310811  | -3.427309 |
| H | 0.617646  | 4.039349  | -3.916723 |
| C | 1.438785  | 3.319349  | -1.343660 |
| H | 2.220656  | 4.066895  | -1.134912 |
| H | 1.805278  | 2.664979  | -2.141601 |
| H | 1.303400  | 2.715396  | -0.435479 |
| H | 0.861336  | 0.019470  | 5.145083  |
| C | 0.236428  | -0.420245 | 4.362629  |
| C | -1.403118 | -1.469181 | 2.335379  |
| C | 0.461146  | -0.045855 | 3.018832  |
| C | -0.804653 | -1.298632 | 4.698316  |
| C | -1.652946 | -1.778380 | 3.689434  |
| C | -0.319869 | -0.627084 | 1.987962  |
| H | -0.980797 | -1.566781 | 5.744849  |
| H | -2.534150 | -2.366199 | 3.953146  |
| C | 1.455133  | 1.042999  | 2.768816  |
| C | 3.328446  | 3.156530  | 2.511944  |
| C | 0.993893  | 2.372375  | 2.530506  |

|   |           |           |          |
|---|-----------|-----------|----------|
| C | 2.840361  | 0.779397  | 2.897532 |
| C | 3.753141  | 1.844584  | 2.768194 |
| C | 1.945849  | 3.397947  | 2.400226 |
| H | 4.824768  | 1.647346  | 2.867204 |
| H | 1.602455  | 4.416591  | 2.217855 |
| C | -2.442645 | -1.872980 | 1.293227 |
| C | -4.995146 | -3.103252 | 0.650146 |
| C | -2.481740 | -3.293410 | 0.801889 |
| C | -3.751787 | -1.167167 | 1.551137 |
| C | -4.928893 | -1.756921 | 1.194822 |
| C | -3.844373 | -3.828565 | 0.514652 |
| H | -5.864784 | -1.208125 | 1.336100 |
| H | -3.922574 | -4.866318 | 0.176635 |
| C | -0.504874 | 2.694091  | 2.495437 |
| H | -1.000331 | 1.887346  | 1.933409 |
| C | -0.848745 | 4.018835  | 1.798797 |
| H | -0.546059 | 4.886776  | 2.408291 |
| H | -1.935547 | 4.086507  | 1.642980 |
| H | -0.365990 | 4.101099  | 0.819253 |
| C | -1.108770 | 2.705919  | 3.917867 |
| H | -0.998157 | 1.737413  | 4.420621 |
| H | -2.183894 | 2.946285  | 3.869582 |
| H | -0.612290 | 3.474964  | 4.533281 |
| C | 3.352610  | -0.625768 | 3.203812 |
| H | 2.478331  | -1.289217 | 3.272317 |
| C | 4.245393  | -1.170971 | 2.076814 |
| H | 5.157253  | -0.566100 | 1.948792 |
| H | 3.718022  | -1.177090 | 1.112852 |
| H | 4.557878  | -2.203869 | 2.299026 |
| C | 4.072412  | -0.670698 | 4.566666 |
| H | 3.419626  | -0.296362 | 5.371503 |
| H | 4.983457  | -0.049635 | 4.558925 |
| H | 4.369774  | -1.703601 | 4.814094 |
| C | 4.340505  | 4.292565  | 2.423384 |
| H | 5.337109  | 3.829366  | 2.312792 |

|   |           |           |           |
|---|-----------|-----------|-----------|
| C | 4.112781  | 5.212482  | 1.208800  |
| H | 3.148176  | 5.740774  | 1.278747  |
| H | 4.113895  | 4.640269  | 0.269284  |
| H | 4.905158  | 5.977229  | 1.151377  |
| C | 4.341809  | 5.107755  | 3.735379  |
| H | 5.120753  | 5.888715  | 3.714623  |
| H | 4.523187  | 4.454459  | 4.603693  |
| H | 3.366663  | 5.601331  | 3.883544  |
| C | -1.506190 | -4.376607 | 1.335965  |
| H | -0.526792 | -3.889955 | 1.467284  |
| C | -1.370374 | -5.524184 | 0.315590  |
| H | -2.223546 | -6.218866 | 0.387124  |
| H | -0.458604 | -6.112328 | 0.506762  |
| H | -1.332341 | -5.135894 | -0.709103 |
| C | -1.915706 | -5.003504 | 2.697113  |
| H | -1.856973 | -4.295669 | 3.533323  |
| H | -1.242668 | -5.847638 | 2.936450  |
| H | -2.941405 | -5.406968 | 2.658993  |
| C | -6.344363 | -3.658780 | 0.208333  |
| H | -6.189691 | -4.718712 | -0.060549 |
| C | -6.821666 | -2.916350 | -1.060518 |
| H | -6.070829 | -2.991720 | -1.861402 |
| H | -6.980616 | -1.845000 | -0.853665 |
| H | -7.774390 | -3.335100 | -1.427312 |
| C | -7.422408 | -3.605228 | 1.311780  |
| H | -7.088491 | -4.126279 | 2.223389  |
| H | -8.354316 | -4.081944 | 0.961987  |
| H | -7.669626 | -2.566575 | 1.586738  |
| C | -3.734468 | 0.233938  | 2.159188  |
| H | -2.734055 | 0.409593  | 2.573902  |
| C | -4.730647 | 0.409838  | 3.319584  |
| H | -4.559914 | -0.344999 | 4.103344  |
| H | -5.774745 | 0.316550  | 2.979872  |
| H | -4.614397 | 1.409473  | 3.771938  |
| C | -3.950928 | 1.291547  | 1.064052  |

|   |           |          |          |
|---|-----------|----------|----------|
| H | -3.864603 | 2.306507 | 1.482983 |
| H | -4.947327 | 1.191617 | 0.604323 |
| H | -3.210308 | 1.194976 | 0.258958 |

-----  
 --  
 -----

--  
 In=N-Ar\*2  
 -----

--  

| Atomic<br>Number | Coordinates (Angstroms) |   |   |
|------------------|-------------------------|---|---|
|                  | X                       | Y | Z |

 -----

--

|   |          |           |           |
|---|----------|-----------|-----------|
| C | 2.944478 | -2.435422 | 0.841322  |
| C | 4.529848 | -0.334302 | 1.783634  |
| C | 2.322926 | -1.294662 | 1.440412  |
| C | 4.344035 | -2.463045 | 0.697089  |
| C | 5.159261 | -1.419734 | 1.162202  |
| C | 3.135382 | -0.257406 | 1.958144  |
| H | 4.810866 | -3.348371 | 0.260466  |
| H | 5.146363 | 0.471896  | 2.190444  |
| C | 2.171321 | -3.735559 | 0.567204  |
| H | 1.094807 | -3.502516 | 0.550479  |
| C | 2.402472 | -4.729883 | 1.730234  |
| H | 1.794045 | -5.638836 | 1.588254  |
| H | 3.463389 | -5.028707 | 1.767676  |
| H | 2.141078 | -4.287187 | 2.699926  |
| C | 2.530375 | -4.444528 | -0.753010 |
| H | 3.582147 | -4.771219 | -0.766125 |
| H | 2.371466 | -3.807415 | -1.635639 |
| H | 1.905294 | -5.344511 | -0.874100 |
| C | 2.656899 | 0.862899  | 2.883903  |
| H | 3.312505 | 1.718179  | 2.650634  |
| C | 2.940253 | 0.473237  | 4.355676  |

|   |           |           |           |
|---|-----------|-----------|-----------|
| H | 3.990712  | 0.174900  | 4.497352  |
| H | 2.302084  | -0.369252 | 4.665010  |
| H | 2.725556  | 1.322733  | 5.026495  |
| C | 1.207588  | 1.343005  | 2.744748  |
| H | 0.934742  | 1.504123  | 1.695347  |
| H | 1.085112  | 2.293113  | 3.285264  |
| H | 0.494845  | 0.631207  | 3.175331  |
| C | 6.680385  | -1.506321 | 1.142389  |
| H | 7.062304  | -0.478065 | 1.253520  |
| C | 7.175058  | -2.316401 | 2.362618  |
| H | 6.813343  | -3.356967 | 2.307356  |
| H | 6.800047  | -1.880627 | 3.302388  |
| H | 8.277717  | -2.338122 | 2.402064  |
| C | 7.254644  | -2.085690 | -0.161752 |
| H | 6.990282  | -3.149224 | -0.281075 |
| H | 8.355310  | -2.019825 | -0.158505 |
| H | 6.875902  | -1.544206 | -1.040728 |
| C | -5.430920 | -2.108530 | -0.479232 |
| C | -2.829598 | -1.671175 | 0.624553  |
| C | -5.216510 | -1.180856 | 0.547478  |
| C | -4.328657 | -2.865645 | -0.905253 |
| C | -3.046774 | -2.684294 | -0.358934 |
| C | -3.952962 | -0.971202 | 1.140245  |
| H | -6.062694 | -0.610514 | 0.935875  |
| H | -4.488841 | -3.645896 | -1.653791 |
| C | -6.822481 | -2.389941 | -1.034517 |
| H | -6.692877 | -3.035755 | -1.921444 |
| C | -7.564793 | -1.118297 | -1.484636 |
| H | -6.983418 | -0.556557 | -2.232277 |
| H | -7.758634 | -0.448260 | -0.632072 |
| H | -8.540300 | -1.377237 | -1.928815 |
| C | -7.659138 | -3.177217 | -0.001332 |
| H | -7.140575 | -4.100306 | 0.303667  |
| H | -8.644357 | -3.450557 | -0.416254 |
| H | -7.826916 | -2.571477 | 0.904720  |



|   |           |           |           |
|---|-----------|-----------|-----------|
| C | -3.997477 | -0.082540 | 2.393095  |
| H | -4.608376 | 0.782409  | 2.095439  |
| C | -2.701655 | 0.491415  | 2.983893  |
| H | -2.008950 | 0.837572  | 2.211785  |
| H | -2.174867 | -0.233005 | 3.617391  |
| H | -2.968975 | 1.355375  | 3.612327  |
| C | -4.772902 | -0.818523 | 3.515464  |
| H | -5.767149 | -1.151743 | 3.181813  |
| H | -4.904673 | -0.152763 | 4.385299  |
| H | -4.217202 | -1.707322 | 3.855671  |
| C | -1.980786 | -3.730760 | -0.686346 |
| H | -0.996041 | -3.312905 | -0.412967 |
| C | -2.190046 | -4.977321 | 0.206063  |
| H | -2.164423 | -4.714364 | 1.272748  |
| H | -1.407966 | -5.731543 | 0.013713  |
| H | -3.170483 | -5.434643 | -0.010426 |
| C | -1.939856 | -4.158037 | -2.165055 |
| H | -1.897110 | -3.294796 | -2.846527 |
| H | -2.826843 | -4.753425 | -2.433903 |
| H | -1.054370 | -4.787316 | -2.353004 |
| C | -1.512241 | -1.641572 | 1.357397  |
| C | 0.698395  | -2.115201 | 3.019001  |
| C | -0.252625 | -1.033446 | 0.982888  |
| C | -1.611122 | -2.413461 | 2.540187  |
| C | -0.544420 | -2.608278 | 3.414060  |
| C | 0.870243  | -1.418125 | 1.806691  |
| H | -2.583891 | -2.851028 | 2.769537  |
| H | -0.665616 | -3.175271 | 4.340648  |
| H | 1.586629  | -2.317348 | 3.620099  |
| C | 3.101529  | 2.476537  | -0.245596 |
| C | 5.018578  | 0.830856  | -1.437065 |
| C | 2.657928  | 1.405225  | -1.092350 |
| C | 4.471711  | 2.620805  | 0.044617  |
| C | 5.452312  | 1.795256  | -0.521401 |
| C | 3.662785  | 0.648006  | -1.764378 |

|   |           |           |           |
|---|-----------|-----------|-----------|
| H | 4.780848  | 3.446614  | 0.686941  |
| H | 5.770732  | 0.235823  | -1.961374 |
| C | 2.192831  | 3.651128  | 0.134175  |
| H | 1.152822  | 3.308980  | 0.111925  |
| C | 2.345478  | 4.761773  | -0.936306 |
| H | 1.660526  | 5.598616  | -0.722796 |
| H | 3.377306  | 5.151905  | -0.928707 |
| H | 2.127908  | 4.391928  | -1.945698 |
| C | 2.472944  | 4.286605  | 1.509059  |
| H | 3.435502  | 4.823136  | 1.515482  |
| H | 2.489986  | 3.552410  | 2.320978  |
| H | 1.693609  | 5.029868  | 1.738449  |
| C | 3.384468  | -0.224064 | -2.984235 |
| H | 2.290389  | -0.308994 | -3.097307 |
| C | 3.979221  | -1.638152 | -2.870435 |
| H | 3.766087  | -2.083970 | -1.890835 |
| H | 5.074274  | -1.615253 | -2.985204 |
| H | 3.577162  | -2.294441 | -3.660082 |
| C | 3.887591  | 0.459778  | -4.275421 |
| H | 3.463232  | 1.467271  | -4.396594 |
| H | 3.611550  | -0.139281 | -5.159629 |
| H | 4.985289  | 0.558584  | -4.259575 |
| C | 6.946919  | 2.015573  | -0.313293 |
| H | 7.437479  | 1.035230  | -0.444791 |
| C | 7.492734  | 2.954753  | -1.413618 |
| H | 7.025236  | 3.950587  | -1.333650 |
| H | 7.268694  | 2.558805  | -2.416724 |
| H | 8.585442  | 3.078554  | -1.322240 |
| C | 7.320445  | 2.547816  | 1.080203  |
| H | 6.956262  | 3.577255  | 1.229329  |
| H | 8.416246  | 2.568491  | 1.199011  |
| H | 6.900749  | 1.922121  | 1.882668  |
| C | -5.071575 | 2.746437  | 0.585277  |
| C | -2.526963 | 1.867596  | -0.383459 |
| C | -4.965894 | 1.855092  | -0.490558 |

|   |           |           |           |
|---|-----------|-----------|-----------|
| C | -3.878703 | 3.204942  | 1.163997  |
| C | -2.618372 | 2.801160  | 0.694742  |
| C | -3.726436 | 1.423892  | -1.006827 |
| H | -5.875757 | 1.492168  | -0.974469 |
| H | -3.937844 | 3.929368  | 1.980046  |
| C | -6.419478 | 3.265748  | 1.070585  |
| H | -6.223008 | 3.887436  | 1.962270  |
| C | -7.375742 | 2.133498  | 1.490935  |
| H | -6.923570 | 1.495539  | 2.266188  |
| H | -7.632443 | 1.493186  | 0.631800  |
| H | -8.317171 | 2.547475  | 1.889224  |
| C | -7.072342 | 4.171650  | 0.004236  |
| H | -6.395990 | 4.993485  | -0.280420 |
| H | -8.012912 | 4.608371  | 0.381161  |
| H | -7.306488 | 3.598030  | -0.908033 |
| C | -3.846974 | 0.569867  | -2.278915 |
| H | -4.647883 | -0.150653 | -2.047765 |
| C | -2.639161 | -0.267723 | -2.720180 |
| H | -2.184001 | -0.766658 | -1.855560 |
| H | -1.878307 | 0.339674  | -3.229450 |
| H | -2.978936 | -1.048305 | -3.421124 |
| C | -4.344586 | 1.426816  | -3.468909 |
| H | -5.245153 | 2.004339  | -3.209604 |
| H | -4.586621 | 0.779819  | -4.329399 |
| H | -3.568118 | 2.137296  | -3.792944 |
| C | -1.385686 | 3.540871  | 1.213025  |
| H | -0.509975 | 2.921620  | 0.985776  |
| C | -1.243785 | 4.874932  | 0.444842  |
| H | -1.148618 | 4.709765  | -0.637006 |
| H | -0.356705 | 5.429194  | 0.789958  |
| H | -2.130153 | 5.507067  | 0.619388  |
| C | -1.374926 | 3.820138  | 2.726199  |
| H | -1.466555 | 2.899396  | 3.314907  |
| H | -2.188033 | 4.501990  | 3.023232  |
| H | -0.426628 | 4.307690  | 3.002020  |

|    |           |           |           |
|----|-----------|-----------|-----------|
| C  | -1.202102 | 1.765098  | -1.103172 |
| C  | 1.069672  | 2.236671  | -2.694062 |
| C  | -0.013016 | 0.975034  | -0.818776 |
| C  | -1.214329 | 2.656162  | -2.201247 |
| C  | -0.136499 | 2.822095  | -3.072023 |
| C  | 1.196120  | 1.430245  | -1.536987 |
| H  | -2.141360 | 3.202190  | -2.384129 |
| H  | -0.211709 | 3.458422  | -3.957266 |
| H  | 1.981015  | 2.473605  | -3.245412 |
| In | 0.495859  | -1.641304 | -1.920767 |
| N  | 0.030818  | -0.332294 | -0.239387 |

-----  
--  
-----  
--  
Ar\*-In≡N-Ar\*

-----  
--

| Atomic<br>Number | Coordinates (Angstroms) |          |           |
|------------------|-------------------------|----------|-----------|
|                  | X                       | Y        | Z         |
| C                | -2.887103               | 3.168093 | 0.035716  |
| C                | -4.398647               | 1.408590 | 1.592539  |
| C                | -2.283641               | 2.535541 | 1.164501  |
| C                | -4.244005               | 2.937602 | -0.250139 |
| C                | -5.030337               | 2.082581 | 0.535055  |
| C                | -3.049434               | 1.619913 | 1.942730  |
| H                | -4.699557               | 3.460479 | -1.093158 |
| H                | -4.983892               | 0.704926 | 2.193339  |
| C                | -2.126712               | 4.161002 | -0.843219 |
| H                | -1.067454               | 4.129069 | -0.559233 |
| C                | -2.613370               | 5.602591 | -0.589644 |
| H                | -2.024696               | 6.321642 | -1.183914 |
| H                | -3.674503               | 5.719253 | -0.865111 |

|   |           |           |           |
|---|-----------|-----------|-----------|
| H | -2.508369 | 5.865947  | 0.474626  |
| C | -2.213406 | 3.792749  | -2.336762 |
| H | -3.248980 | 3.835631  | -2.710692 |
| H | -1.837889 | 2.773178  | -2.519525 |
| H | -1.613422 | 4.493189  | -2.939601 |
| C | -2.577294 | 0.891789  | 3.206417  |
| H | -3.260284 | 0.029936  | 3.306923  |
| C | -2.798425 | 1.784925  | 4.449166  |
| H | -3.832638 | 2.164094  | 4.483941  |
| H | -2.115273 | 2.649017  | 4.437364  |
| H | -2.606355 | 1.212256  | 5.372249  |
| C | -1.153041 | 0.318494  | 3.195697  |
| H | -0.974826 | -0.320452 | 2.316737  |
| H | -1.004908 | -0.309992 | 4.088985  |
| H | -0.392856 | 1.108792  | 3.221064  |
| C | -6.535518 | 1.961376  | 0.341656  |
| H | -6.836512 | 0.978468  | 0.735844  |
| C | -7.246256 | 3.038114  | 1.195161  |
| H | -6.968325 | 4.047903  | 0.848769  |
| H | -6.958568 | 2.955700  | 2.255302  |
| H | -8.342655 | 2.938009  | 1.121897  |
| C | -6.989507 | 2.049252  | -1.125223 |
| H | -6.845994 | 3.063928  | -1.532092 |
| H | -8.063767 | 1.815448  | -1.206579 |
| H | -6.432143 | 1.345865  | -1.762146 |
| C | 5.094607  | 1.986287  | -1.315720 |
| C | 2.714085  | 2.484138  | 0.183813  |
| C | 4.918952  | 1.459012  | -0.028043 |
| C | 4.021240  | 2.698878  | -1.874194 |
| C | 2.839027  | 2.955697  | -1.158795 |
| C | 3.756998  | 1.688911  | 0.738250  |
| H | 5.709985  | 0.857187  | 0.420690  |
| H | 4.127603  | 3.096269  | -2.887636 |
| C | 6.420463  | 1.915928  | -2.066848 |
| H | 6.186360  | 1.954925  | -3.146247 |

|   |           |           |           |
|---|-----------|-----------|-----------|
| C | 7.242314  | 0.643323  | -1.805958 |
| H | 6.670568  | -0.266884 | -2.040595 |
| H | 7.565990  | 0.583165  | -0.754761 |
| H | 8.152546  | 0.645941  | -2.427419 |
| C | 7.255749  | 3.172471  | -1.723643 |
| H | 6.694117  | 4.094188  | -1.943267 |
| H | 8.197136  | 3.189866  | -2.298520 |
| H | 7.507982  | 3.179945  | -0.649756 |
| C | 3.774856  | 1.076658  | 2.141736  |
| H | 4.431803  | 0.197365  | 2.049760  |
| C | 2.440474  | 0.547717  | 2.679532  |
| H | 1.944281  | -0.105613 | 1.946752  |
| H | 1.756359  | 1.358643  | 2.957464  |
| H | 2.627995  | -0.056069 | 3.581327  |
| C | 4.440564  | 2.033782  | 3.155667  |
| H | 5.416358  | 2.388092  | 2.786124  |
| H | 4.600875  | 1.519561  | 4.118426  |
| H | 3.805903  | 2.913405  | 3.345368  |
| C | 1.760868  | 3.810605  | -1.824077 |
| H | 0.850543  | 3.742801  | -1.215274 |
| C | 2.179116  | 5.295605  | -1.841305 |
| H | 2.384792  | 5.653271  | -0.820115 |
| H | 1.379604  | 5.920859  | -2.273373 |
| H | 3.091835  | 5.441387  | -2.442769 |
| C | 1.407893  | 3.308273  | -3.237290 |
| H | 1.100855  | 2.249668  | -3.220894 |
| H | 2.262188  | 3.393731  | -3.927940 |
| H | 0.580989  | 3.900469  | -3.658758 |
| C | 1.537290  | 2.957408  | 0.993713  |
| C | -0.676650 | 4.029483  | 2.402061  |
| C | 0.240386  | 2.408656  | 0.834389  |
| C | 1.705487  | 4.042742  | 1.880457  |
| C | 0.611280  | 4.556341  | 2.597134  |
| C | -0.880424 | 2.960052  | 1.504821  |
| H | 2.696441  | 4.488416  | 1.996404  |

|   |           |           |           |
|---|-----------|-----------|-----------|
| H | 0.757314  | 5.393003  | 3.286593  |
| H | -1.535652 | 4.465539  | 2.918435  |
| C | -3.227568 | -2.902333 | 0.091123  |
| C | -4.761794 | -1.367891 | -1.664091 |
| C | -2.637591 | -2.434923 | -1.118000 |
| C | -4.575498 | -2.620611 | 0.370940  |
| C | -5.374585 | -1.872586 | -0.505520 |
| C | -3.416784 | -1.636304 | -1.998435 |
| H | -5.015346 | -3.027743 | 1.283046  |
| H | -5.359886 | -0.770212 | -2.361525 |
| C | -2.466941 | -3.812152 | 1.052247  |
| H | -1.410202 | -3.796714 | 0.764904  |
| C | -2.952195 | -5.269334 | 0.905451  |
| H | -2.368947 | -5.942109 | 1.556584  |
| H | -4.016520 | -5.362239 | 1.180335  |
| H | -2.838492 | -5.611566 | -0.135082 |
| C | -2.554913 | -3.333903 | 2.511841  |
| H | -3.589458 | -3.354125 | 2.891706  |
| H | -2.174432 | -2.307671 | 2.607473  |
| H | -1.953184 | -3.988135 | 3.163150  |
| C | -2.964141 | -1.111367 | -3.366425 |
| H | -3.627068 | -0.253115 | -3.579076 |
| C | -3.236918 | -2.165100 | -4.465599 |
| H | -4.273553 | -2.533429 | -4.402705 |
| H | -2.559604 | -3.025390 | -4.357469 |
| H | -3.080841 | -1.731721 | -5.468549 |
| C | -1.523423 | -0.589050 | -3.471378 |
| H | -1.310630 | 0.148025  | -2.675914 |
| H | -1.374628 | -0.082451 | -4.439913 |
| H | -0.784651 | -1.396463 | -3.392606 |
| C | -6.876157 | -1.705498 | -0.296963 |
| H | -7.160818 | -0.726564 | -0.716780 |
| C | -7.631521 | -2.786775 | -1.104659 |
| H | -7.366385 | -3.792256 | -0.736626 |
| H | -7.365179 | -2.739514 | -2.172146 |

|   |           |           |           |
|---|-----------|-----------|-----------|
| H | -8.723936 | -2.661034 | -1.009773 |
| C | -7.318498 | -1.740576 | 1.176475  |
| H | -7.206095 | -2.749760 | 1.605385  |
| H | -8.382853 | -1.466567 | 1.262779  |
| H | -6.731329 | -1.046452 | 1.797634  |
| C | 4.847210  | -2.460068 | 1.301896  |
| C | 2.380693  | -2.625879 | -0.138387 |
| C | 4.750949  | -2.036570 | -0.031413 |
| C | 3.662183  | -2.871811 | 1.933304  |
| C | 2.436365  | -2.953070 | 1.250655  |
| C | 3.545236  | -2.098224 | -0.763243 |
| H | 5.641417  | -1.662818 | -0.542562 |
| H | 3.708980  | -3.170375 | 2.983705  |
| C | 6.183283  | -2.581137 | 2.027185  |
| H | 5.958241  | -2.726464 | 3.099061  |
| C | 7.086407  | -1.340983 | 1.900771  |
| H | 6.587508  | -0.436304 | 2.280741  |
| H | 7.371077  | -1.160532 | 0.852335  |
| H | 8.017937  | -1.483856 | 2.473523  |
| C | 6.925824  | -3.842591 | 1.529919  |
| H | 6.291666  | -4.737513 | 1.632063  |
| H | 7.857348  | -4.004900 | 2.098948  |
| H | 7.188951  | -3.737293 | 0.463972  |
| C | 3.634467  | -1.594568 | -2.209160 |
| H | 4.479674  | -0.885940 | -2.201967 |
| C | 2.423016  | -0.794874 | -2.710462 |
| H | 2.196885  | 0.029277  | -2.012784 |
| H | 1.531019  | -1.425015 | -2.821926 |
| H | 2.648063  | -0.342608 | -3.690665 |
| C | 4.012707  | -2.719134 | -3.199859 |
| H | 4.865804  | -3.303776 | -2.818131 |
| H | 4.296740  | -2.291774 | -4.177054 |
| H | 3.170334  | -3.406851 | -3.363418 |
| C | 1.208524  | -3.481905 | 1.990617  |
| H | 0.329089  | -3.066476 | 1.487082  |



|    |           |           |           |
|----|-----------|-----------|-----------|
| C  | 1.138497  | -5.020417 | 1.897244  |
| H  | 1.133940  | -5.353052 | 0.848915  |
| H  | 0.222599  | -5.397047 | 2.382441  |
| H  | 2.006544  | -5.478919 | 2.401282  |
| C  | 1.127529  | -3.022731 | 3.457673  |
| H  | 1.181686  | -1.928034 | 3.537046  |
| H  | 1.931676  | -3.453717 | 4.076524  |
| H  | 0.171250  | -3.347141 | 3.896368  |
| C  | 1.163616  | -3.031965 | -0.922591 |
| C  | -1.116499 | -4.083071 | -2.226649 |
| C  | -0.100783 | -2.351860 | -0.797678 |
| C  | 1.252714  | -4.192399 | -1.711702 |
| C  | 0.134316  | -4.705507 | -2.390944 |
| C  | -1.257160 | -2.933878 | -1.432963 |
| H  | 2.210877  | -4.715129 | -1.768501 |
| H  | 0.225699  | -5.608055 | -3.001436 |
| H  | -2.008249 | -4.520356 | -2.684061 |
| In | -0.024029 | 0.604387  | -0.244270 |
| N  | -0.215267 | -1.246528 | -0.005078 |

-----  
 --

-----  
 --

M062X/Def2-TZVP

-----  
 --

-----  
 --

F-In≡N-F

-----  
 --

| Atomic<br>Number | Coordinates (Angstroms) |   |   |
|------------------|-------------------------|---|---|
|                  | X                       | Y | Z |

-----  
 --

|    |           |           |           |
|----|-----------|-----------|-----------|
| In | 0.287136  | -0.019627 | -0.000002 |
| N  | -1.603652 | 0.658373  | 0.000122  |
| F  | -2.542670 | -0.367793 | -0.000040 |
| F  | 2.226660  | -0.037416 | -0.000046 |

-----  
--  
-----  
--  
F2-In=N  
-----

-----  
--  
Atomic Coordinates (Angstroms)  
Number X Y Z  
-----

|    |           |           |           |
|----|-----------|-----------|-----------|
| In | -0.066754 | 0.000171  | -0.000000 |
| N  | -2.140759 | 0.005878  | -0.000001 |
| F  | 1.009421  | -1.605151 | 0.000000  |
| F  | 1.019050  | 1.599648  | 0.000000  |

-----  
--  
-----  
--  
In=N-F  
-----

-----  
--  
Atomic Coordinates (Angstroms)  
Number X Y Z  
-----

|    |           |           |           |
|----|-----------|-----------|-----------|
| In | 0.773362  | 0.013194  | -0.004739 |
| N  | -1.435454 | -0.009690 | 0.681327  |
| F  | -1.622681 | 1.064001  | -0.256955 |
| F  | -1.471384 | -1.128300 | -0.247165 |

--

-----  
--  
F-In≡N-F-TS1  
-----

--

| Atomic<br>Number | Coordinates (Angstroms) |           |           |
|------------------|-------------------------|-----------|-----------|
|                  | X                       | Y         | Z         |
| In               | -0.117497               | -0.151276 | 0.029658  |
| N                | 1.744062                | -0.909540 | -0.087890 |
| F                | -1.981601               | 0.246258  | -0.078846 |
| F                | 1.264812                | 1.284774  | -0.014268 |

-----

--

-----  
--  
F-In≡N-F-TS2  
-----

--

| Atomic<br>Number | Coordinates (Angstroms) |           |           |
|------------------|-------------------------|-----------|-----------|
|                  | X                       | Y         | Z         |
| In               | 0.677601                | -0.275521 | -0.018403 |
| N                | -1.861363               | -0.104382 | 0.667452  |
| F                | -2.563343               | -0.123492 | -0.405178 |
| F                | 0.321910                | 1.704737  | -0.013758 |

-----

--

-----  
--  
HO-In≡N-OH  
-----

--

| Atomic<br>Number | Coordinates (Angstroms) |   |   |
|------------------|-------------------------|---|---|
|                  | X                       | Y | Z |

--

|    |           |           |           |
|----|-----------|-----------|-----------|
| In | -0.313790 | -0.176079 | -0.010855 |
| N  | 1.582282  | 0.635680  | -0.215476 |
| O  | 2.685971  | 0.038781  | 0.246712  |
| H  | 3.173543  | -0.305331 | -0.516882 |
| O  | -2.234115 | 0.379677  | 0.005263  |
| H  | -2.488669 | 1.135755  | 0.541324  |

--

(OH)<sub>2</sub>-In≡N

--

| Atomic<br>Number | Coordinates (Angstroms) |   |   |
|------------------|-------------------------|---|---|
|                  | X                       | Y | Z |

--

|    |           |           |           |
|----|-----------|-----------|-----------|
| In | -0.066874 | 0.037413  | 0.001597  |
| N  | -2.094799 | 0.676068  | -0.003774 |
| O  | 1.484873  | 1.260318  | -0.003237 |
| H  | 2.333756  | 0.808504  | -0.001947 |
| O  | 0.492763  | -1.867448 | -0.002167 |
| H  | -0.214407 | -2.517175 | -0.006660 |

--

In≡N-(OH)<sub>2</sub>

--

| Atomic<br>Number | Coordinates (Angstroms) |           |           |
|------------------|-------------------------|-----------|-----------|
|                  | X                       | Y         | Z         |
| In               | 0.928636                | 0.000000  | 0.000000  |
| N                | -1.204731               | 0.000000  | 0.000000  |
| O                | -2.016151               | 1.136572  | -0.107065 |
| H                | -2.405819               | 1.266150  | 0.768861  |
| O                | -2.016151               | -1.136572 | 0.107065  |
| H                | -2.405819               | -1.266150 | -0.768861 |

HO-In≡N-OH-TS1

| Atomic<br>Number | Coordinates (Angstroms) |           |           |
|------------------|-------------------------|-----------|-----------|
|                  | X                       | Y         | Z         |
| In               | 0.163789                | -0.169995 | 0.017114  |
| N                | -1.772868               | -1.044506 | -0.053469 |
| O                | -1.531882               | 1.343723  | -0.093402 |
| H                | -2.093681               | 1.277313  | 0.688778  |
| O                | 2.031161                | 0.395851  | -0.139334 |
| H                | 2.483884                | 0.447412  | 0.708810  |

HO-In≡N-OH-TS2

| Atomic | Coordinates (Angstroms) |  |  |
|--------|-------------------------|--|--|
|--------|-------------------------|--|--|

| Number | X         | Y         | Z         |
|--------|-----------|-----------|-----------|
| --     |           |           |           |
| In     | -0.726231 | -0.189487 | 0.017038  |
| N      | 1.268253  | -0.369195 | -0.231310 |
| O      | 2.507312  | -0.469577 | -0.010656 |
| H      | 2.689875  | -0.493855 | 0.950753  |
| O      | 0.356866  | 1.759139  | -0.067875 |
| H      | 1.104230  | 2.046580  | 0.461807  |

H-In≡N-H

| Atomic Number | Coordinates (Angstroms) |           |           |
|---------------|-------------------------|-----------|-----------|
|               | X                       | Y         | Z         |
| --            |                         |           |           |
| In            | -0.240264               | 0.012850  | -0.000001 |
| N             | 1.645868                | -0.159921 | 0.000038  |
| H             | 2.163146                | 0.719099  | -0.000094 |
| H             | -1.911308               | -0.229280 | -0.000112 |

H2-In≡N

| Atomic Number | Coordinates (Angstroms) |   |   |
|---------------|-------------------------|---|---|
|               | X                       | Y | Z |
| --            |                         |   |   |

|    |           |           |           |
|----|-----------|-----------|-----------|
| In | -0.000103 | -0.225148 | -0.000000 |
| N  | -0.000103 | 1.848159  | 0.000000  |
| H  | -1.559812 | -0.960198 | -0.000000 |
| H  | 1.565597  | -0.944660 | -0.000000 |

-----  
 --  
 -----  
 --  
 In≡N-H  
 -----

-----  
 --  

| Atomic<br>Number | Coordinates (Angstroms) |   |   |
|------------------|-------------------------|---|---|
|                  | X                       | Y | Z |

 -----

|    |           |           |           |
|----|-----------|-----------|-----------|
| In | 0.000000  | -0.344806 | 0.000000  |
| N  | 0.000000  | 1.745441  | -0.000000 |
| H  | -0.820055 | 2.338691  | -0.000000 |
| H  | 0.820052  | 2.338694  | -0.000000 |

-----  
 --  
 -----  
 --  
 H-In≡N-H-TS1  
 -----

-----  
 --  

| Atomic<br>Number | Coordinates (Angstroms) |   |   |
|------------------|-------------------------|---|---|
|                  | X                       | Y | Z |

 -----

|    |           |           |           |
|----|-----------|-----------|-----------|
| In | 0.225413  | 0.003791  | 0.000000  |
| N  | -1.797669 | -0.131090 | 0.000000  |
| H  | -0.051793 | 1.738886  | -0.000000 |
| H  | 1.590221  | -1.007037 | -0.000000 |

 -----

--

H-In≡N-H-TS2

--

| Atomic<br>Number | Coordinates (Angstroms) |           |           |
|------------------|-------------------------|-----------|-----------|
|                  | X                       | Y         | Z         |
| In               | -0.299408               | -0.027115 | 0.001245  |
| N                | 1.677469                | -0.011452 | -0.036066 |
| H                | 2.638887                | -0.285919 | 0.164440  |
| H                | 0.289832                | 1.694696  | 0.027014  |

--

3HC-In≡N-CH3

--

| Atomic<br>Number | Coordinates (Angstroms) |           |           |
|------------------|-------------------------|-----------|-----------|
|                  | X                       | Y         | Z         |
| In               | -0.289205               | -0.067272 | 0.004161  |
| N                | 1.511744                | 0.517717  | 0.004307  |
| C                | -2.415420               | 0.110029  | -0.013097 |
| H                | -2.683432               | 1.163302  | -0.083022 |
| H                | -2.831410               | -0.305463 | 0.902323  |
| H                | -2.825830               | -0.421732 | -0.868998 |
| C                | 2.806061                | -0.108732 | -0.010520 |
| H                | 3.013332                | -0.740359 | 0.862836  |
| H                | 3.566353                | 0.683688  | -0.002064 |
| H                | 3.005960                | -0.714901 | -0.903384 |



-----  
--  
-----  
--  
(CH3)-In≡N  
-----  
--

| Atomic<br>Number | Coordinates (Angstroms) |           |           |
|------------------|-------------------------|-----------|-----------|
|                  | X                       | Y         | Z         |
| N                | -0.026881               | 2.220128  | 0.006884  |
| In               | 0.000986                | 0.030554  | -0.003177 |
| C                | -1.953098               | -0.912587 | 0.005249  |
| H                | -2.516207               | -0.591370 | -0.871277 |
| H                | -2.503207               | -0.586032 | 0.888388  |
| H                | -1.886364               | -1.998257 | 0.008493  |
| C                | 1.970483                | -0.879901 | 0.009090  |
| H                | 2.702683                | -0.176496 | 0.400738  |
| H                | 2.256595                | -1.140311 | -1.010931 |
| H                | 1.982056                | -1.790640 | 0.606043  |

-----  
--  
-----  
--

In≡N-(CH3)2  
-----  
--

| Atomic<br>Number | Coordinates (Angstroms) |          |           |
|------------------|-------------------------|----------|-----------|
|                  | X                       | Y        | Z         |
| In               | -0.925690               | 0.000000 | 0.000000  |
| N                | 1.177522                | 0.000000 | -0.000010 |
| C                | 1.986407                | 1.193386 | 0.000002  |

-----  
--

|   |          |           |           |
|---|----------|-----------|-----------|
| H | 1.359693 | 2.091588  | -0.000020 |
| H | 2.639986 | 1.251435  | -0.883635 |
| H | 2.639944 | 1.251443  | 0.883670  |
| C | 1.986408 | -1.193386 | 0.000001  |
| H | 2.639983 | -1.251416 | 0.883643  |
| H | 1.359692 | -2.091587 | 0.000041  |
| H | 2.639947 | -1.251462 | -0.883663 |

--

--

3HC-In≡N-CH3-TS1

--

| Atomic<br>Number | Coordinates (Angstroms) |   |   |
|------------------|-------------------------|---|---|
|                  | X                       | Y | Z |

--

|    |           |           |           |
|----|-----------|-----------|-----------|
| In | -0.695102 | -0.307292 | 0.000934  |
| N  | 1.317234  | -0.197917 | -0.018106 |
| C  | -0.110848 | 1.983709  | -0.000198 |
| H  | 0.635074  | 2.153087  | -0.765117 |
| H  | 0.256467  | 2.215285  | 0.993521  |
| H  | -1.047553 | 2.488051  | -0.219113 |
| C  | 2.715663  | -0.272533 | 0.009390  |
| H  | 3.143281  | -0.645428 | 0.949880  |
| H  | 3.066093  | 0.772306  | -0.090162 |
| H  | 3.157109  | -0.807640 | -0.843204 |

--

3HC-In≡N-CH3-TS2

--

| Atomic<br>Number | Coordinates (Angstroms) |           |           |
|------------------|-------------------------|-----------|-----------|
|                  | X                       | Y         | Z         |
| -----            |                         |           |           |
| --               |                         |           |           |
| In               | -0.679157               | -0.322721 | -0.004217 |
| N                | 1.325389                | -0.134820 | 0.084530  |
| C                | -0.196279               | 1.991524  | -0.002546 |
| H                | 0.387412                | 2.242369  | -0.878947 |
| H                | 0.303267                | 2.256036  | 0.920852  |
| H                | -1.203661               | 2.394766  | -0.052581 |
| C                | 2.721151                | -0.207200 | -0.030690 |
| H                | 2.988937                | -1.277658 | -0.050201 |
| H                | 3.254433                | 0.210995  | 0.834410  |
| H                | 3.121329                | 0.224630  | -0.959214 |

--

3HSi-In≡N-SiH3

| Atomic<br>Number | Coordinates (Angstroms) |           |           |
|------------------|-------------------------|-----------|-----------|
|                  | X                       | Y         | Z         |
| -----            |                         |           |           |
| --               |                         |           |           |
| In               | -0.308016               | 0.035134  | -0.005477 |
| N                | 1.514418                | 0.469310  | 0.008974  |
| Si               | -2.833958               | -0.100867 | 0.007299  |
| H                | -3.384964               | 1.223912  | 0.349456  |
| H                | -3.230764               | -1.097542 | 1.019420  |
| H                | -3.290913               | -0.519072 | -1.330711 |
| Si               | 3.085719                | -0.153970 | 0.004058  |
| H                | 3.343583                | -1.155350 | 1.077123  |
| H                | 4.074367                | 0.937271  | 0.203177  |
| H                | 3.455901                | -0.828232 | -1.271914 |

-----  
--  
-----  
--  
(SiH3)-In≡N  
-----

-----

| Atomic<br>Number | Coordinates (Angstroms) |           |           |
|------------------|-------------------------|-----------|-----------|
|                  | X                       | Y         | Z         |
| N                | 0.020998                | 2.377357  | -0.001182 |
| In               | -0.000739               | 0.336091  | 0.000464  |
| Si               | 2.281488                | -0.928759 | -0.000332 |
| H                | 3.471449                | -0.053764 | -0.014926 |
| H                | 2.316931                | -1.805939 | -1.192636 |
| H                | 2.332886                | -1.788222 | 1.204159  |
| Si               | -2.287660               | -0.917950 | -0.000406 |
| H                | -2.334303               | -1.788064 | 1.196678  |
| H                | -3.472667               | -0.036175 | 0.002830  |
| H                | -2.338647               | -1.783833 | -1.200239 |

-----

-----  
--  
-----  
--  
In≡N-(SiH3)2  
-----

| Atomic<br>Number | Coordinates (Angstroms) |           |           |
|------------------|-------------------------|-----------|-----------|
|                  | X                       | Y         | Z         |
| In               | 1.292757                | -0.000075 | -0.000019 |
| N                | -0.877641               | 0.000001  | 0.000598  |
| Si               | -1.645480               | 1.523213  | 0.000236  |

-----

|    |           |           |           |
|----|-----------|-----------|-----------|
| H  | -0.577666 | 2.563669  | 0.085321  |
| H  | -2.558780 | 1.730545  | 1.150443  |
| H  | -2.424011 | 1.798115  | -1.232423 |
| Si | -1.645873 | -1.523020 | -0.000333 |
| H  | -2.561497 | -1.727588 | -1.149230 |
| H  | -0.578570 | -2.563686 | -0.089277 |
| H  | -2.422114 | -1.800088 | 1.233276  |

-----  
 --  
 -----

--  
 3HSi-In≡N-SiH3-TS1

-----  
 --

| Atomic<br>Number | Coordinates (Angstroms) |   |   |
|------------------|-------------------------|---|---|
|                  | X                       | Y | Z |

-----  
 --

|    |           |           |           |
|----|-----------|-----------|-----------|
| N  | 1.480722  | -1.616390 | -0.002469 |
| In | -0.154290 | -0.394111 | 0.001032  |
| Si | -2.513146 | 0.672776  | -0.003763 |
| H  | -3.498120 | -0.429881 | 0.101365  |
| H  | -2.743451 | 1.443570  | -1.247753 |
| H  | -2.654710 | 1.567416  | 1.169934  |
| Si | 2.383843  | 1.025534  | 0.001155  |
| H  | 2.425518  | 1.579098  | 1.375052  |
| H  | 3.716526  | 0.651114  | -0.500895 |
| H  | 1.759643  | 2.038502  | -0.894450 |

-----  
 --  
 -----

--  
 3HSi-In≡N-SiH3-TS2

-----  
 --

| Atomic<br>Number | Coordinates (Angstroms) |           |           |
|------------------|-------------------------|-----------|-----------|
|                  | X                       | Y         | Z         |
| -----            |                         |           |           |
| --               |                         |           |           |
| In               | 0.670907                | -0.780203 | 0.000085  |
| N                | -1.090800               | 0.061614  | -0.001477 |
| Si               | 1.360132                | 1.784301  | 0.000056  |
| H                | 0.841608                | 2.407351  | -1.236461 |
| H                | 2.845134                | 1.848076  | 0.003191  |
| H                | 0.836387                | 2.409731  | 1.233107  |
| Si               | -2.775863               | 0.338653  | 0.000275  |
| H                | -3.484263               | -0.207745 | -1.196529 |
| H                | -2.976243               | 1.820591  | -0.003794 |
| H                | -3.481233               | -0.200708 | 1.202040  |

-----  
--  
-----  
--  
-----  
--  
B3PW91/DeF2-TZVP

-----  
--  
-----  
--  
-----  
--  
F-In≡N-F

| Atomic<br>Number | Coordinates (Angstroms) |           |           |
|------------------|-------------------------|-----------|-----------|
|                  | X                       | Y         | Z         |
| -----            |                         |           |           |
| --               |                         |           |           |
| In               | 0.287136                | -0.019627 | -0.000002 |
| N                | -1.603652               | 0.658373  | 0.000122  |
| F                | -2.542670               | -0.367793 | -0.000040 |
| F                | 2.226660                | -0.037416 | -0.000046 |

--

-----  
--  
F2-In=N

--

| Atomic<br>Number | Coordinates (Angstroms) |   |   |
|------------------|-------------------------|---|---|
|                  | X                       | Y | Z |

-----  
--

|    |           |           |           |
|----|-----------|-----------|-----------|
| In | -0.070579 | 0.010629  | -0.000448 |
| N  | -2.118120 | 0.185371  | 0.001087  |
| F  | 0.853876  | -1.689972 | 0.000786  |
| F  | 1.177813  | 1.487924  | 0.000805  |

-----  
--

-----  
--  
In=N-F2

--

| Atomic<br>Number | Coordinates (Angstroms) |   |   |
|------------------|-------------------------|---|---|
|                  | X                       | Y | Z |

-----  
--

|    |           |           |           |
|----|-----------|-----------|-----------|
| In | 0.797932  | 0.060183  | -0.009429 |
| N  | -1.428104 | 0.000221  | 0.667007  |
| F  | -1.991081 | 0.893029  | -0.268563 |
| F  | -1.242470 | -1.220862 | -0.198884 |

-----  
--

-----  
--  
F-In=N-F-TS1

-----

--

| Atomic<br>Number | Coordinates (Angstroms) |   |   |
|------------------|-------------------------|---|---|
|                  | X                       | Y | Z |

--

|    |           |           |           |
|----|-----------|-----------|-----------|
| In | -0.000000 | 0.162884  | 0.000000  |
| N  | 2.015122  | -0.029054 | 0.000000  |
| F  | -1.745473 | 0.948336  | -0.000000 |
| F  | 0.178156  | -1.812549 | -0.000000 |

--

F-In≡N-F-TS2

--

| Atomic<br>Number | Coordinates (Angstroms) |   |   |
|------------------|-------------------------|---|---|
|                  | X                       | Y | Z |

--

|    |           |           |           |
|----|-----------|-----------|-----------|
| In | 0.694880  | -0.211061 | -0.034646 |
| N  | -1.617059 | -0.567780 | 0.516060  |
| F  | -2.486750 | -0.059667 | -0.315314 |
| F  | -0.038772 | 1.650381  | 0.102564  |

--

HO-In≡N-OH

--

| Atomic<br>Number | Coordinates (Angstroms) |   |   |
|------------------|-------------------------|---|---|
|                  | X                       | Y | Z |

--



|    |           |           |           |
|----|-----------|-----------|-----------|
| In | -0.318983 | -0.200858 | 0.003576  |
| N  | 1.555575  | 0.656590  | -0.117011 |
| O  | 2.708899  | 0.060953  | 0.166044  |
| H  | 3.134073  | -0.161523 | -0.679582 |
| O  | -2.202287 | 0.476937  | -0.077243 |
| H  | -2.445835 | 1.104309  | 0.613035  |

--

(OH)<sub>2</sub>-In≡N

--

| Atomic<br>Number | Coordinates (Angstroms) |   |   |
|------------------|-------------------------|---|---|
|                  | X                       | Y | Z |

--

|    |           |           |           |
|----|-----------|-----------|-----------|
| In | -0.073940 | 0.038026  | 0.001347  |
| N  | -2.114425 | 0.572684  | -0.003260 |
| O  | 1.440961  | 1.310082  | -0.002597 |
| H  | 2.281865  | 0.840102  | -0.002900 |
| O  | 0.591814  | -1.838335 | -0.001609 |
| H  | -0.120050 | -2.486128 | -0.006657 |

--

In≡N-(OH)<sub>2</sub>

--

| Atomic<br>Number | Coordinates (Angstroms) |   |   |
|------------------|-------------------------|---|---|
|                  | X                       | Y | Z |

--

|    |          |          |          |
|----|----------|----------|----------|
| In | 0.924191 | 0.000000 | 0.000000 |
|----|----------|----------|----------|

|   |           |           |           |
|---|-----------|-----------|-----------|
| N | -1.200033 | 0.000000  | -0.000000 |
| O | -2.006905 | 1.143697  | -0.108103 |
| H | -2.387324 | 1.280019  | 0.772721  |
| O | -2.006905 | -1.143698 | 0.108103  |
| H | -2.387324 | -1.280019 | -0.772721 |

--

--

HO-In≡N-OH-TS1

--

| Atomic<br>Number | Coordinates (Angstroms) |   |   |
|------------------|-------------------------|---|---|
|                  | X                       | Y | Z |

--

|    |           |           |           |
|----|-----------|-----------|-----------|
| In | -0.058531 | 0.112006  | -0.015061 |
| N  | 1.541519  | 1.354027  | 0.045470  |
| O  | 1.068915  | -1.556889 | 0.060064  |
| H  | 1.957261  | -1.435914 | -0.291200 |
| O  | -1.991649 | -0.210382 | 0.024195  |
| H  | -2.498012 | 0.607575  | 0.036835  |

--

HO-In≡N-OH-TS2

--

| Atomic<br>Number | Coordinates (Angstroms) |   |   |
|------------------|-------------------------|---|---|
|                  | X                       | Y | Z |

--

|    |           |           |           |
|----|-----------|-----------|-----------|
| In | -0.722930 | -0.194826 | 0.017766  |
| N  | 1.270914  | -0.340476 | -0.256652 |

|   |          |           |           |
|---|----------|-----------|-----------|
| O | 2.517664 | -0.462290 | -0.001500 |
| H | 2.669621 | -0.507230 | 0.966450  |
| O | 0.327810 | 1.771558  | -0.064274 |
| H | 1.093774 | 1.962877  | 0.485766  |

H-In≡N-H

| Atomic<br>Number | Coordinates (Angstroms) |   |   |
|------------------|-------------------------|---|---|
|                  | X                       | Y | Z |

|    |           |           |           |
|----|-----------|-----------|-----------|
| In | -0.239236 | 0.013264  | 0.000005  |
| N  | 1.639724  | -0.162278 | -0.000021 |
| H  | 2.142790  | 0.727704  | -0.000018 |
| H  | -1.898308 | -0.241696 | -0.000081 |

H<sub>2</sub>-In≡N

| Atomic<br>Number | Coordinates (Angstroms) |   |   |
|------------------|-------------------------|---|---|
|                  | X                       | Y | Z |

|    |           |           |          |
|----|-----------|-----------|----------|
| In | 0.001667  | -0.214743 | 0.000000 |
| N  | 0.001667  | 1.800824  | 0.000000 |
| H  | -1.542830 | -0.962459 | 0.000000 |
| H  | 1.449506  | -1.120920 | 0.000000 |

--

-----  
--  
In≡N-H2

--

-----  
Atomic Coordinates (Angstroms)  
Number X Y Z

--

-----  
In 0.000000 -0.343041 -0.000000  
N 0.000000 1.736419 -0.000000  
H -0.822054 2.327025 0.000000  
H 0.822052 2.327029 -0.000000  
-----

--

-----  
--  
H-In≡N-H-TS1

--

-----  
Atomic Coordinates (Angstroms)  
Number X Y Z

--

-----  
In 0.215595 -0.001442 0.000000  
N -1.786416 -0.069118 -0.000000  
H 0.486945 1.711943 -0.000000  
H 1.453820 -1.157435 -0.000000  
-----

--

-----  
--  
H-In≡N-H-TS2

-----

--

| Atomic<br>Number | Coordinates (Angstroms) |   |   |
|------------------|-------------------------|---|---|
|                  | X                       | Y | Z |

--

|    |           |           |           |
|----|-----------|-----------|-----------|
| In | -0.297986 | -0.027236 | 0.001349  |
| N  | 1.671632  | -0.007227 | -0.040298 |
| H  | 2.624363  | -0.295774 | 0.183803  |
| H  | 0.275505  | 1.680928  | 0.032200  |

--

3HC-In≡N-CH3

--

| Atomic<br>Number | Coordinates (Angstroms) |   |   |
|------------------|-------------------------|---|---|
|                  | X                       | Y | Z |

--

|    |           |           |           |
|----|-----------|-----------|-----------|
| In | -0.287593 | -0.070367 | -0.000154 |
| N  | 1.503586  | 0.525288  | -0.000138 |
| C  | -2.403610 | 0.118214  | 0.000549  |
| H  | -2.663892 | 1.176964  | -0.031283 |
| H  | -2.811437 | -0.329492 | 0.905849  |
| H  | -2.816462 | -0.384029 | -0.873282 |
| C  | 2.789893  | -0.107112 | 0.000400  |
| H  | 2.996985  | -0.724373 | 0.886146  |
| H  | 3.546883  | 0.690835  | -0.000105 |
| H  | 2.997164  | -0.725525 | -0.884519 |

--

(CH3)2-In≡N

-----

--

| Atomic<br>Number | Coordinates (Angstroms) |           |           |
|------------------|-------------------------|-----------|-----------|
|                  | X                       | Y         | Z         |
| N                | -0.038664               | 2.215226  | -0.004945 |
| In               | 0.001286                | 0.028379  | 0.002549  |
| C                | -1.943971               | -0.912903 | -0.004411 |
| H                | -2.482805               | -0.614836 | -0.905797 |
| H                | -2.509673               | -0.549875 | 0.855806  |
| H                | -1.876380               | -1.999198 | 0.036824  |
| C                | 1.968081                | -0.867269 | -0.000291 |
| H                | 2.682624                | -0.192535 | 0.474233  |
| H                | 2.280869                | -1.028678 | -1.036738 |
| H                | 1.968329                | -1.831021 | 0.513598  |

-----

--

-----

--

In≡N-(CH3)2

-----

--

| Atomic<br>Number | Coordinates (Angstroms) |           |           |
|------------------|-------------------------|-----------|-----------|
|                  | X                       | Y         | Z         |
| In               | -0.921071               | 0.000004  | -0.000001 |
| N                | 1.175025                | 0.000006  | 0.000020  |
| C                | 1.975016                | 1.195937  | -0.000003 |
| H                | 1.342726                | 2.091582  | 0.000023  |
| H                | 2.630510                | 1.263161  | -0.884514 |
| H                | 2.630573                | 1.263153  | 0.884461  |
| C                | 1.974963                | -1.195961 | -0.000004 |
| H                | 2.630506                | -1.263216 | 0.884468  |

|   |          |           |           |
|---|----------|-----------|-----------|
| H | 1.342631 | -2.091578 | 0.000010  |
| H | 2.630463 | -1.263209 | -0.884509 |

-----  
--  
-----  
--  
3HC-In≡N-CH3-TS1  
-----

| Atomic<br>Number | Coordinates (Angstroms) |           |           |
|------------------|-------------------------|-----------|-----------|
|                  | X                       | Y         | Z         |
| In               | -0.702186               | -0.297513 | 0.000144  |
| N                | 1.302785                | -0.216765 | -0.005779 |
| C                | -0.035988               | 1.989522  | -0.000062 |
| H                | 0.630334                | 2.195011  | -0.828169 |
| H                | 0.398252                | 2.202868  | 0.969630  |
| H                | -1.017180               | 2.439639  | -0.130345 |
| C                | 2.694156                | -0.310032 | 0.002722  |
| H                | 3.123993                | -0.752477 | 0.916542  |
| H                | 3.074760                | 0.729886  | -0.023708 |
| H                | 3.128449                | -0.796359 | -0.886521 |

-----  
--  
-----  
--  
3HC-In≡N-CH3-TS2  
-----

| Atomic<br>Number | Coordinates (Angstroms) |           |          |
|------------------|-------------------------|-----------|----------|
|                  | X                       | Y         | Z        |
| In               | 0.027092                | -0.113269 | 0.002173 |

|   |           |           |           |
|---|-----------|-----------|-----------|
| N | -1.056925 | -1.800076 | -0.005862 |
| C | 2.112632  | 0.399100  | -0.005372 |
| H | 2.294044  | 1.139256  | -0.784471 |
| H | 2.727010  | -0.481720 | -0.182426 |
| H | 2.367568  | 0.833507  | 0.961739  |
| C | -1.480370 | 1.498688  | -0.003490 |
| H | -1.397193 | 2.027120  | 0.945723  |
| H | -2.475376 | 1.079587  | -0.122969 |
| H | -1.238656 | 2.166265  | -0.829854 |

-----  
--  
-----  
--  
3HSi-In≡N-SiH3  
-----

--  

| Atomic<br>Number | Coordinates (Angstroms) |   |   |
|------------------|-------------------------|---|---|
|                  | X                       | Y | Z |

-----

--

|    |           |           |           |
|----|-----------|-----------|-----------|
| In | -0.296471 | 0.066068  | -0.012717 |
| N  | 1.513752  | 0.551340  | 0.026674  |
| Si | -2.811976 | -0.158225 | 0.017726  |
| H  | -3.395513 | 1.147066  | 0.414019  |
| H  | -3.198408 | -1.203501 | 0.995688  |
| H  | -3.278168 | -0.513735 | -1.344462 |
| Si | 3.035271  | -0.212735 | 0.004588  |
| H  | 3.214477  | -1.232559 | 1.087458  |
| H  | 4.097333  | 0.806278  | 0.251797  |
| H  | 3.364954  | -0.906846 | -1.280479 |

-----  
--  
-----  
--

(SiH3)2-In≡N



--

| Atomic<br>Number | Coordinates (Angstroms) |   |   |
|------------------|-------------------------|---|---|
|                  | X                       | Y | Z |

--

|    |           |           |           |
|----|-----------|-----------|-----------|
| N  | 0.051711  | 2.381495  | 0.004560  |
| In | -0.000811 | 0.415567  | -0.001533 |
| Si | 2.128576  | -1.052326 | 0.001120  |
| H  | 3.366903  | -0.236607 | -0.027570 |
| H  | 2.083376  | -1.933349 | -1.194213 |
| H  | 2.108897  | -1.888067 | 1.229276  |
| Si | -2.146502 | -1.021127 | 0.001271  |
| H  | -2.116508 | -1.899802 | 1.198847  |
| H  | -3.372221 | -0.186089 | 0.027565  |
| H  | -2.141711 | -1.860994 | -1.224172 |

--

In≡N-(SiH3)2

--

| Atomic<br>Number | Coordinates (Angstroms) |   |   |
|------------------|-------------------------|---|---|
|                  | X                       | Y | Z |

--

|    |           |           |           |
|----|-----------|-----------|-----------|
| In | 1.283691  | -0.000176 | -0.000023 |
| N  | -0.880764 | 0.000013  | 0.000734  |
| Si | -1.632660 | 1.533907  | 0.000069  |
| H  | -0.543708 | 2.565849  | 0.037586  |
| H  | -2.509805 | 1.777823  | 1.181542  |
| H  | -2.448872 | 1.806130  | -1.218336 |
| Si | -1.633554 | -1.533434 | -0.000200 |
| H  | -2.512209 | -1.774676 | -1.181084 |

|   |           |           |           |
|---|-----------|-----------|-----------|
| H | -0.545358 | -2.565988 | -0.040535 |
| H | -2.448558 | -1.807210 | 1.218646  |

-----  
--  
-----  
--  
3HSi-In≡N-SiH3-TS1  
-----

| Atomic<br>Number | Coordinates (Angstroms) |           |           |
|------------------|-------------------------|-----------|-----------|
|                  | X                       | Y         | Z         |
| N                | 0.505901                | -2.311312 | 0.017266  |
| In               | -0.020663               | -0.411874 | -0.005845 |
| Si               | -2.231301               | 0.882567  | 0.005270  |
| H                | -3.397996               | -0.033419 | 0.058569  |
| H                | -2.308914               | 1.707079  | -1.228249 |
| H                | -2.256106               | 1.779196  | 1.189633  |
| Si               | 2.090723                | 1.154392  | 0.003717  |
| H                | 2.031628                | 1.990702  | 1.230332  |
| H                | 3.350010                | 0.373665  | -0.013339 |
| H                | 2.020636                | 2.026369  | -1.197201 |

-----  
--  
-----  
--  
3HSi-In≡N-SiH3-TS2  
-----

| Atomic<br>Number | Coordinates (Angstroms) |           |          |
|------------------|-------------------------|-----------|----------|
|                  | X                       | Y         | Z        |
| In               | 0.670907                | -0.780203 | 0.000085 |

|    |           |           |           |
|----|-----------|-----------|-----------|
| N  | -1.090800 | 0.061614  | -0.001477 |
| Si | 1.360132  | 1.784301  | 0.000056  |
| H  | 0.841608  | 2.407351  | -1.236461 |
| H  | 2.845134  | 1.848076  | 0.003191  |
| H  | 0.836387  | 2.409731  | 1.233107  |
| Si | -2.775863 | 0.338653  | 0.000275  |
| H  | -3.484263 | -0.207745 | -1.196529 |
| H  | -2.976243 | 1.820591  | -0.003794 |
| H  | -3.481233 | -0.200708 | 1.202040  |

-----  
 --  
 -----  
 --  
 B3LYP/LANL2DZ+dp  
 -----  
 --  
 -----  
 --

F-In≡N-F  
 -----  
 --

| Atomic<br>Number | Coordinates (Angstroms) |           |           |
|------------------|-------------------------|-----------|-----------|
|                  | X                       | Y         | Z         |
| In               | 0.296704                | -0.037620 | 0.000082  |
| N                | -1.545238               | 0.661486  | -0.000010 |
| F                | -2.562717               | -0.322867 | -0.000193 |
| F                | 2.149183                | 0.013196  | -0.000246 |

-----  
 --  
 -----  
 --  
 F2-In=N  
 -----

--

| Atomic<br>Number | Coordinates (Angstroms) |   |   |
|------------------|-------------------------|---|---|
|                  | X                       | Y | Z |

--

|    |           |           |           |
|----|-----------|-----------|-----------|
| In | -0.036967 | 0.001019  | -0.000000 |
| N  | -2.092501 | 0.050744  | -0.000001 |
| F  | 0.875250  | -1.606267 | 0.000000  |
| F  | 0.953515  | 1.561251  | 0.000000  |

--

In=N-F2

--

| Atomic<br>Number | Coordinates (Angstroms) |   |   |
|------------------|-------------------------|---|---|
|                  | X                       | Y | Z |

--

|    |           |           |           |
|----|-----------|-----------|-----------|
| In | 0.757361  | 0.013571  | -0.005229 |
| N  | -1.399220 | -0.008658 | 0.694979  |
| F  | -1.591614 | 1.095979  | -0.261403 |
| F  | -1.443513 | -1.163131 | -0.250667 |

--

F-In=N-F-TS1

--

| Atomic<br>Number | Coordinates (Angstroms) |   |   |
|------------------|-------------------------|---|---|
|                  | X                       | Y | Z |

--

|    |           |           |           |
|----|-----------|-----------|-----------|
| In | -0.112636 | -0.111430 | -0.001057 |
| N  | 1.657923  | -1.014896 | 0.002740  |
| F  | -1.922148 | 0.157494  | 0.002746  |
| F  | 1.245895  | 1.238546  | 0.000879  |

-----  
--  
-----  
--  
F-In≡N-F-TS2  
-----

-----  
--  
Atomic Coordinates (Angstroms)  
Number X Y Z  
-----

|    |           |           |           |
|----|-----------|-----------|-----------|
| In | 0.675791  | -0.234507 | -0.016498 |
| N  | -1.558026 | -0.054309 | 0.599018  |
| F  | -2.478814 | -0.314080 | -0.317592 |
| F  | 0.011306  | 1.633078  | -0.058485 |

-----  
--  
-----  
--  
HO-In≡N-OH  
-----

-----  
--  
Atomic Coordinates (Angstroms)  
Number X Y Z  
-----

|    |           |           |           |
|----|-----------|-----------|-----------|
| In | -0.326845 | -0.215978 | -0.002884 |
| N  | 1.502203  | 0.607149  | -0.224199 |
| O  | 2.685997  | 0.119597  | 0.233580  |
| H  | 3.207596  | -0.149364 | -0.550302 |
| O  | -2.108682 | 0.528136  | -0.017231 |

H                    -2.326120      1.300375      0.530202

-----  
--  
-----

--  
(OH)<sub>2</sub>-In≡N  
-----

--  
Atomic                    Coordinates (Angstroms)  
Number                    X                    Y                    Z  
-----

--  
In                    -0.005772      0.051546      -0.000117  
N                    -0.956526      1.876913      0.000342  
O                    1.895233      -0.090775      -0.000102  
H                    2.277726      -0.979166      0.003539  
O                    -1.055061      -1.555699      -0.000389  
H                    -2.020616      -1.513169      0.003734  
-----

--  
-----  
--

In≡N-(OH)<sub>2</sub>  
-----

--  
Atomic                    Coordinates (Angstroms)  
Number                    X                    Y                    Z  
-----

--  
In                    0.915270      0.000000      0.000000  
N                    -1.173349      0.000000      0.000000  
O                    -1.992861      1.157980      -0.108615  
H                    -2.374515      1.292145      0.778699  
O                    -1.992861      -1.157980      0.108615  
H                    -2.374515      -1.292145      -0.778699

HO-In≡N-OH-TS1

| Atomic<br>Number | Coordinates (Angstroms) |           |           |
|------------------|-------------------------|-----------|-----------|
|                  | X                       | Y         | Z         |
| In               | -0.087251               | 0.089025  | 0.007418  |
| N                | 1.498189                | 1.313612  | -0.023277 |
| O                | 1.278400                | -1.307813 | 0.097944  |
| H                | 1.767960                | -1.550431 | -0.700658 |
| O                | -1.954085               | -0.253017 | -0.043683 |
| H                | -2.574526               | 0.479562  | 0.066037  |

HO-In≡N-OH-TS2

| Atomic<br>Number | Coordinates (Angstroms) |           |           |
|------------------|-------------------------|-----------|-----------|
|                  | X                       | Y         | Z         |
| In               | -0.702993               | -0.203486 | 0.014119  |
| N                | 1.272274                | -0.280198 | -0.391307 |
| O                | 2.465692                | -0.467989 | 0.082278  |
| H                | 2.424418                | -0.656078 | 1.050806  |
| O                | 0.323002                | 1.774681  | 0.122010  |

H 0.806738 2.134722 -0.637789

-----

--

-----

--

H-In≡N-H

-----

--

| Atomic<br>Number | Coordinates (Angstroms) |   |   |
|------------------|-------------------------|---|---|
|                  | X                       | Y | Z |

-----

--

|    |           |           |           |
|----|-----------|-----------|-----------|
| In | -0.236498 | 0.019447  | -0.000001 |
| N  | 1.601086  | -0.167294 | 0.000019  |
| H  | 2.275745  | 0.602709  | -0.000012 |
| H  | -1.894955 | -0.384551 | -0.000057 |

-----

--

-----

--

H2-In≡N

-----

--

| Atomic<br>Number | Coordinates (Angstroms) |   |   |
|------------------|-------------------------|---|---|
|                  | X                       | Y | Z |

-----

--

|    |           |           |          |
|----|-----------|-----------|----------|
| In | 0.001887  | -0.216812 | 0.000000 |
| N  | 0.001887  | 1.801567  | 0.000000 |
| H  | -1.591187 | -0.894193 | 0.000000 |
| H  | 1.485528  | -1.092988 | 0.000000 |

-----

--

-----

--



In≡N-H2

---

--

| Atomic<br>Number | Coordinates (Angstroms) |           |           |
|------------------|-------------------------|-----------|-----------|
|                  | X                       | Y         | Z         |
| In               | 0.000000                | -0.337887 | 0.000000  |
| N                | 0.000000                | 1.704749  | 0.000000  |
| H                | -0.822937               | 2.311619  | -0.000000 |
| H                | 0.822933                | 2.311625  | 0.000000  |

---

--

---

--

H-In≡N-H-TS1

---

--

| Atomic<br>Number | Coordinates (Angstroms) |           |           |
|------------------|-------------------------|-----------|-----------|
|                  | X                       | Y         | Z         |
| In               | 0.217150                | 0.000805  | -0.000000 |
| N                | -1.771050               | -0.102865 | 0.000000  |
| H                | 0.213293                | 1.754680  | 0.000000  |
| H                | 1.543718                | -1.074083 | 0.000000  |

---

--

---

--

H-In≡N-H-TS2

---

--

| Atomic<br>Number | Coordinates (Angstroms) |   |   |
|------------------|-------------------------|---|---|
|                  | X                       | Y | Z |

--

|    |           |           |           |
|----|-----------|-----------|-----------|
| In | -0.291748 | -0.027003 | 0.000068  |
| N  | 1.626618  | -0.014024 | -0.001805 |
| H  | 2.620793  | -0.272887 | 0.008076  |
| H  | 0.288533  | 1.694217  | 0.001249  |

--

3HC-In≡N-CH3

--

| Atomic<br>Number | Coordinates (Angstroms) |   |   |
|------------------|-------------------------|---|---|
|                  | X                       | Y | Z |

--

|    |           |           |           |
|----|-----------|-----------|-----------|
| In | -0.291126 | -0.111322 | 0.002314  |
| N  | 1.460896  | 0.477442  | 0.011498  |
| C  | -2.384755 | 0.246348  | -0.008915 |
| H  | -2.564826 | 1.302515  | -0.249316 |
| H  | -2.815473 | 0.026057  | 0.975308  |
| H  | -2.880541 | -0.378955 | -0.760706 |
| C  | 2.821350  | -0.000178 | -0.009878 |
| H  | 3.101359  | -0.612242 | 0.867263  |
| H  | 3.493270  | 0.878846  | -0.000716 |
| H  | 3.085534  | -0.580568 | -0.912924 |

--

(CH3)2-In≡N

--

| Atomic | Coordinates (Angstroms) |  |  |
|--------|-------------------------|--|--|
|--------|-------------------------|--|--|

| Number | X         | Y         | Z         |
|--------|-----------|-----------|-----------|
| --     |           |           |           |
| N      | 0.168821  | 2.077817  | 0.001568  |
| In     | -0.005489 | 0.064970  | -0.000682 |
| C      | -1.966017 | -0.836146 | 0.001760  |
| H      | -2.115998 | -1.391520 | -0.933921 |
| H      | -2.749596 | -0.075359 | 0.093330  |
| H      | -2.049712 | -1.540700 | 0.839935  |
| C      | 1.870791  | -1.012994 | 0.000463  |
| H      | 2.719135  | -0.327197 | -0.102425 |
| H      | 1.883476  | -1.730566 | -0.830702 |
| H      | 1.971278  | -1.568082 | 0.942898  |

--

---

--

In≡N-(CH3)2

| Atomic<br>Number | Coordinates (Angstroms) |           |           |
|------------------|-------------------------|-----------|-----------|
|                  | X                       | Y         | Z         |
| --               |                         |           |           |
| In               | -0.912190               | -0.000010 | 0.000002  |
| N                | 1.142889                | -0.000014 | -0.000061 |
| C                | 1.962304                | 1.203893  | 0.000010  |
| H                | 1.333390                | 2.109682  | 0.000119  |
| H                | 2.620340                | 1.262868  | -0.889387 |
| H                | 2.620408                | 1.262720  | 0.889367  |
| C                | 1.962422                | -1.203837 | 0.000015  |
| H                | 2.620201                | -1.262842 | 0.889602  |
| H                | 1.333598                | -2.109687 | -0.000386 |
| H                | 2.620799                | -1.262498 | -0.889151 |

--

--

3HC-In≡N-CH3-TS1

--

| Atomic<br>Number | Coordinates (Angstroms) |           |           |
|------------------|-------------------------|-----------|-----------|
|                  | X                       | Y         | Z         |
| In               | -0.704092               | -0.283997 | -0.000085 |
| N                | 1.249121                | -0.259841 | -0.001019 |
| C                | 0.046576                | 1.983849  | -0.000217 |
| H                | 0.725321                | 2.172144  | -0.831926 |
| H                | 0.493853                | 2.189365  | 0.973196  |
| H                | -0.916604               | 2.487354  | -0.130318 |
| C                | 2.659051                | -0.346097 | 0.001597  |
| H                | 3.091709                | -0.781487 | 0.923214  |
| H                | 3.043913                | 0.696825  | -0.046469 |
| H                | 3.084723                | -0.855975 | -0.884670 |

--

3HC-In≡N-CH3-TS2

--

| Atomic<br>Number | Coordinates (Angstroms) |           |           |
|------------------|-------------------------|-----------|-----------|
|                  | X                       | Y         | Z         |
| In               | 0.046317                | -0.089279 | -0.000597 |
| N                | -1.031815               | -1.768973 | 0.001250  |
| C                | 2.130047                | 0.405644  | 0.000164  |
| H                | 2.342117                | 1.133237  | -0.794065 |

--

|   |           |           |           |
|---|-----------|-----------|-----------|
| H | 2.749845  | -0.484865 | -0.156705 |
| H | 2.400989  | 0.859508  | 0.962805  |
| C | -1.614946 | 1.341881  | 0.000563  |
| H | -1.557579 | 1.929109  | 0.926211  |
| H | -2.581364 | 0.832211  | -0.055184 |
| H | -1.491444 | 2.003134  | -0.866917 |

--

3HSi-In≡N-SiH3

--

| Atomic<br>Number | Coordinates (Angstroms) |   |   |
|------------------|-------------------------|---|---|
|                  | X                       | Y | Z |

--

|    |           |           |           |
|----|-----------|-----------|-----------|
| In | -0.308016 | 0.035134  | -0.005477 |
| N  | 1.514418  | 0.469310  | 0.008974  |
| Si | -2.833958 | -0.100867 | 0.007299  |
| H  | -3.384964 | 1.223912  | 0.349456  |
| H  | -3.230764 | -1.097542 | 1.019420  |
| H  | -3.290913 | -0.519072 | -1.330711 |
| Si | 3.085719  | -0.153970 | 0.004058  |
| H  | 3.343583  | -1.155350 | 1.077123  |
| H  | 4.074367  | 0.937271  | 0.203177  |
| H  | 3.455901  | -0.828232 | -1.271914 |

--

(SiH3)2-In≡N

--

| Atomic | Coordinates (Angstroms) |  |  |
|--------|-------------------------|--|--|
|--------|-------------------------|--|--|

| Number | X         | Y         | Z         |
|--------|-----------|-----------|-----------|
| --     |           |           |           |
| N      | 0.020998  | 2.377357  | -0.001182 |
| In     | -0.000739 | 0.336091  | 0.000464  |
| Si     | 2.281488  | -0.928759 | -0.000332 |
| H      | 3.471449  | -0.053764 | -0.014926 |
| H      | 2.316931  | -1.805939 | -1.192636 |
| H      | 2.332886  | -1.788222 | 1.204159  |
| Si     | -2.287660 | -0.917950 | -0.000406 |
| H      | -2.334303 | -1.788064 | 1.196678  |
| H      | -3.472667 | -0.036175 | 0.002830  |
| H      | -2.338647 | -1.783833 | -1.200239 |

--

In≡N-(SiH3)2

| Atomic<br>Number | Coordinates (Angstroms) |           |           |
|------------------|-------------------------|-----------|-----------|
|                  | X                       | Y         | Z         |
| --               |                         |           |           |
| In               | 1.292757                | -0.000075 | -0.000019 |
| N                | -0.877641               | 0.000001  | 0.000598  |
| Si               | -1.645480               | 1.523213  | 0.000236  |
| H                | -0.577666               | 2.563669  | 0.085321  |
| H                | -2.558780               | 1.730545  | 1.150443  |
| H                | -2.424011               | 1.798115  | -1.232423 |
| Si               | -1.645873               | -1.523020 | -0.000333 |
| H                | -2.561497               | -1.727588 | -1.149230 |
| H                | -0.578570               | -2.563686 | -0.089277 |
| H                | -2.422114               | -1.800088 | 1.233276  |

--

--

3HSi-In≡N-SiH3-TS1

--

| Atomic<br>Number | Coordinates (Angstroms) |   |   |
|------------------|-------------------------|---|---|
|                  | X                       | Y | Z |

--

|    |           |           |           |
|----|-----------|-----------|-----------|
| N  | 1.480722  | -1.616390 | -0.002469 |
| In | -0.154290 | -0.394111 | 0.001032  |
| Si | -2.513146 | 0.672776  | -0.003763 |
| H  | -3.498120 | -0.429881 | 0.101365  |
| H  | -2.743451 | 1.443570  | -1.247753 |
| H  | -2.654710 | 1.567416  | 1.169934  |
| Si | 2.383843  | 1.025534  | 0.001155  |
| H  | 2.425518  | 1.579098  | 1.375052  |
| H  | 3.716526  | 0.651114  | -0.500895 |
| H  | 1.759643  | 2.038502  | -0.894450 |

--

3HSi-In≡N-SiH3-TS2

--

| Atomic<br>Number | Coordinates (Angstroms) |   |   |
|------------------|-------------------------|---|---|
|                  | X                       | Y | Z |

--

|    |           |           |           |
|----|-----------|-----------|-----------|
| In | 0.670907  | -0.780203 | 0.000085  |
| N  | -1.090800 | 0.061614  | -0.001477 |
| Si | 1.360132  | 1.784301  | 0.000056  |
| H  | 0.841608  | 2.407351  | -1.236461 |

|    |           |           |           |
|----|-----------|-----------|-----------|
| H  | 2.845134  | 1.848076  | 0.003191  |
| H  | 0.836387  | 2.409731  | 1.233107  |
| Si | -2.775863 | 0.338653  | 0.000275  |
| H  | -3.484263 | -0.207745 | -1.196529 |
| H  | -2.976243 | 1.820591  | -0.003794 |
| H  | -3.481233 | -0.200708 | 1.202040  |

M06-2x/Def2-tzvp

F2Tl-Sb

| Atomic<br>Number | Coordinates (Angstroms) |   |   |
|------------------|-------------------------|---|---|
|                  | X                       | Y | Z |

|    |           |           |           |
|----|-----------|-----------|-----------|
| Tl | 0.753332  | -0.004042 | 0.000016  |
| Sb | -1.925425 | -0.001827 | -0.000008 |
| F  | 2.036569  | 1.568983  | -0.000046 |
| F  | 2.094184  | -1.522254 | -0.000048 |

F2Tl-Sb (TS1)

| Atomic<br>Number | Coordinates (Angstroms) |   |   |
|------------------|-------------------------|---|---|
|                  | X                       | Y | Z |

|    |           |           |           |
|----|-----------|-----------|-----------|
| Tl | -0.772600 | -0.073952 | -0.000009 |
| Sb | 1.904582  | -0.051761 | 0.000005  |
| F  | -1.270320 | 1.931086  | 0.000017  |



F -2.568908 -0.972209 0.000039

F-Tl-Sb-F

| Atomic<br>Number | Coordinates (Angstroms) |   |   |
|------------------|-------------------------|---|---|
|                  | X                       | Y | Z |

|    |           |           |           |
|----|-----------|-----------|-----------|
| Tl | -0.982115 | -0.030128 | -0.000007 |
| Sb | 1.764941  | -0.277858 | 0.000005  |
| F  | 1.828804  | 1.666687  | -0.000001 |
| F  | -2.991103 | 0.178997  | 0.000037  |

Tl-SbF2 (TS2)

| Atomic<br>Number | Coordinates (Angstroms) |   |   |
|------------------|-------------------------|---|---|
|                  | X                       | Y | Z |

|    |           |           |           |
|----|-----------|-----------|-----------|
| Tl | 1.680733  | -0.136414 | 0.000001  |
| Sb | -2.037305 | 0.119960  | -0.000283 |
| F  | 0.152038  | 1.413911  | 0.000692  |
| F  | -3.733901 | -0.865962 | 0.000907  |

Tl-SbF2

---

-

| Atomic<br>Number | Coordinates (Angstroms) |           |           |
|------------------|-------------------------|-----------|-----------|
|                  | X                       | Y         | Z         |
| Sb               | -1.756578               | 0.002794  | -0.227821 |
| Tl               | 1.293669                | -0.000249 | -0.061189 |
| F                | -0.851708               | -1.347944 | 0.914882  |
| F                | -0.837373               | 1.334351  | 0.926803  |

---

(OH)2Tl-Sb

---

-

| Atomic<br>Number | Coordinates (Angstroms) |           |           |
|------------------|-------------------------|-----------|-----------|
|                  | X                       | Y         | Z         |
| Tl               | 0.752998                | -0.000119 | 0.000002  |
| Sb               | -1.954605               | -0.000023 | -0.000005 |
| O                | 2.046639                | 1.633205  | -0.000013 |
| H                | 2.966985                | 1.353543  | 0.000085  |
| O                | 2.047992                | -1.632130 | 0.000023  |
| H                | 2.967983                | -1.351381 | -0.000031 |

---

(OH)2Tl-Sb (TS1)

---

-

| Atomic | Coordinates (Angstroms) |   |   |
|--------|-------------------------|---|---|
| Number | X                       | Y | Z |

--

|    |           |           |           |
|----|-----------|-----------|-----------|
| Tl | -0.783162 | -0.095833 | -0.011322 |
| Sb | 1.896988  | -0.077124 | 0.007173  |
| O  | -0.838039 | 2.019467  | -0.000561 |
| H  | -1.720372 | 2.384066  | 0.114009  |
| O  | -2.752123 | -0.654460 | 0.050851  |
| H  | -2.868580 | -1.608327 | 0.034927  |

-

HO-Tl-Sb-OH

| Atomic | Coordinates (Angstroms) |   |   |
|--------|-------------------------|---|---|
| Number | X                       | Y | Z |

-

|    |           |           |           |
|----|-----------|-----------|-----------|
| Tl | -0.975751 | -0.046472 | 0.001725  |
| Sb | 1.750491  | -0.285960 | -0.000216 |
| O  | 1.902634  | 1.697467  | -0.110823 |
| H  | 2.006550  | 2.097951  | 0.755502  |
| O  | -3.002572 | 0.285291  | 0.094343  |
| H  | -3.446305 | 0.388202  | -0.752311 |

-

Tl-Sb(OH)<sub>2</sub> (TS2)

| Atomic | Coordinates (Angstroms) |  |  |
|--------|-------------------------|--|--|
|--------|-------------------------|--|--|

| Number | X         | Y         | Z         |
|--------|-----------|-----------|-----------|
| -      |           |           |           |
| Tl     | 1.460265  | -0.174813 | 0.000058  |
| Sb     | -1.787203 | 0.206515  | 0.000950  |
| O      | -3.132264 | -1.283892 | -0.002316 |
| H      | -2.768472 | -2.172923 | -0.008753 |
| O      | 0.066957  | 1.679524  | -0.002115 |
| H      | 0.156784  | 2.635412  | -0.008943 |

Tl-Sb(OH)<sub>2</sub>

| Atomic Number | Coordinates (Angstroms) |           |           |
|---------------|-------------------------|-----------|-----------|
|               | X                       | Y         | Z         |
| -             |                         |           |           |
| Sb            | -1.667220               | 0.018217  | -0.343603 |
| Tl            | 1.376473                | -0.012725 | -0.012436 |
| O             | -1.264747               | 1.526024  | 0.991978  |
| H             | -2.085478               | 1.867317  | 1.380789  |
| O             | -1.489912               | -1.529626 | 0.978367  |
| H             | -2.343392               | -1.736856 | 1.387530  |

H<sub>2</sub>Tl-Sb

| Atomic Number | Coordinates (Angstroms) |   |   |
|---------------|-------------------------|---|---|
|               | X                       | Y | Z |
| -             |                         |   |   |

---

|    |           |           |           |
|----|-----------|-----------|-----------|
| Tl | 1.010032  | -0.000001 | 0.000014  |
| H  | 1.884555  | -1.496094 | 0.000027  |
| Sb | -1.678070 | -0.000001 | -0.000023 |
| H  | 1.884401  | 1.496196  | 0.000027  |

---

-

---

-

---

H2Tl-Sb (TS1)

---

| Atomic<br>Number | Coordinates (Angstroms) |           |           |
|------------------|-------------------------|-----------|-----------|
|                  | X                       | Y         | Z         |
| Tl               | 0.997890                | -0.004468 | 0.000046  |
| H                | 2.398845                | -0.969967 | 0.000111  |
| Sb               | -1.653526               | -0.008684 | -0.000077 |
| H                | 1.101877                | 1.774804  | 0.000061  |

---

-

---

-

---

H-Tl-Sb-H

---

| Atomic<br>Number | Coordinates (Angstroms) |           |          |
|------------------|-------------------------|-----------|----------|
|                  | X                       | Y         | Z        |
| Tl               | -1.005703               | -0.003699 | 0.000000 |
| H                | -2.733075               | 0.085645  | 0.000002 |
| Sb               | 1.623887                | -0.028720 | 0.000000 |

---

|   |          |          |          |
|---|----------|----------|----------|
| H | 1.376781 | 1.678720 | 0.000000 |
|---|----------|----------|----------|

-----  
-  
-----  
-  
TI-SbH2 (TS2)

| Atomic<br>Number | Coordinates (Angstroms) |   |   |
|------------------|-------------------------|---|---|
|                  | X                       | Y | Z |

|    |           |           |           |
|----|-----------|-----------|-----------|
| Tl | 1.133921  | -0.021285 | 0.004203  |
| Sb | -1.792612 | -0.014014 | -0.023895 |
| H  | -1.358567 | 0.699791  | 1.479010  |
| H  | 0.934121  | 1.739027  | -0.600813 |

-----  
-  
-----  
-  
TI-SbH2

| Atomic<br>Number | Coordinates (Angstroms) |   |   |
|------------------|-------------------------|---|---|
|                  | X                       | Y | Z |

|    |           |           |           |
|----|-----------|-----------|-----------|
| Tl | 1.191397  | 0.000003  | -0.002780 |
| Sb | -1.832079 | -0.000080 | -0.040305 |
| H  | -1.532840 | -1.220781 | 1.142251  |
| H  | -1.534326 | 1.224667  | 1.138492  |

(CH3)2Tl-Sb

---

-

| Atomic<br>Number | Coordinates (Angstroms) |           |           |
|------------------|-------------------------|-----------|-----------|
|                  | X                       | Y         | Z         |
| Tl               | -0.761734               | -0.000362 | 0.000176  |
| Sb               | 1.933125                | -0.000796 | -0.000087 |
| C                | -1.975349               | 1.861444  | -0.002894 |
| H                | -2.198419               | 2.120888  | 1.030776  |
| H                | -1.438264               | 2.679461  | -0.474645 |
| H                | -2.904083               | 1.666730  | -0.534618 |
| C                | -1.986348               | -1.854004 | 0.001945  |
| H                | -2.920776               | -1.650161 | 0.519937  |
| H                | -2.197231               | -2.120365 | -1.032468 |
| H                | -1.459976               | -2.671271 | 0.486872  |

---

(CH3)2Tl-Sb (TS1)

---

-

| Atomic<br>Number | Coordinates (Angstroms) |           |           |
|------------------|-------------------------|-----------|-----------|
|                  | X                       | Y         | Z         |
| Tl               | -0.771889               | -0.046411 | -0.000188 |
| Sb               | 1.886772                | -0.124266 | 0.000089  |
| C                | -0.970438               | 2.225393  | 0.000185  |
| H                | -1.595872               | 2.486310  | -0.851103 |
| H                | -1.468981               | 2.500907  | 0.927360  |
| H                | -0.019799               | 2.747225  | -0.072353 |
| C                | -2.649927               | -1.164059 | 0.000943  |

---

|   |           |           |           |
|---|-----------|-----------|-----------|
| H | -3.196523 | -0.918947 | -0.907523 |
| H | -2.464232 | -2.232869 | 0.043141  |
| H | -3.234728 | -0.853760 | 0.864450  |

H3C-Tl-Sb-CH3

| Atomic<br>Number | Coordinates (Angstroms) |   |   |
|------------------|-------------------------|---|---|
|                  | X                       | Y | Z |

|    |           |           |           |
|----|-----------|-----------|-----------|
| Sb | 1.686121  | -0.364528 | -0.001478 |
| Tl | -0.942619 | -0.006746 | 0.002163  |
| C  | 2.137441  | 1.791783  | 0.000105  |
| H  | 1.737781  | 2.302327  | -0.873051 |
| H  | 3.226892  | 1.845245  | -0.044283 |
| H  | 1.810133  | 2.281905  | 0.913244  |
| C  | -3.130675 | 0.206338  | -0.008049 |
| H  | -3.563478 | -0.660394 | -0.512437 |
| H  | -3.395567 | 1.115747  | -0.552287 |
| H  | -3.496417 | 0.263768  | 1.016655  |

Tl-Sb(CH3)2 (TS2)

| Atomic<br>Number | Coordinates (Angstroms) |   |   |
|------------------|-------------------------|---|---|
|                  | X                       | Y | Z |



|    |           |           |           |
|----|-----------|-----------|-----------|
| Tl | -1.192259 | -0.233862 | 0.078274  |
| Sb | 1.803440  | -0.177647 | -0.272960 |
| C  | 1.604902  | 0.932576  | 1.579465  |
| H  | 2.094061  | 0.379130  | 2.381530  |
| H  | 2.149938  | 1.870322  | 1.450378  |
| H  | 0.575095  | 1.157695  | 1.864457  |
| C  | -1.085630 | 2.000653  | -0.804785 |
| H  | -2.108818 | 2.344902  | -0.669963 |
| H  | -0.821491 | 2.018873  | -1.859481 |
| H  | -0.406928 | 2.632540  | -0.234204 |

-----  
-  
-----  
-  
Tl-Sb(CH<sub>3</sub>)<sub>2</sub>  
-----  
-

| Atomic<br>Number | Coordinates (Angstroms) |           |           |
|------------------|-------------------------|-----------|-----------|
|                  | X                       | Y         | Z         |
| Tl               | -1.331181               | 0.000257  | -0.021106 |
| Sb               | 1.623626                | -0.000503 | -0.395873 |
| C                | 1.399192                | 1.573194  | 1.125842  |
| H                | 0.459667                | 1.522222  | 1.688362  |
| H                | 2.210689                | 1.477869  | 1.846119  |
| H                | 1.464146                | 2.553325  | 0.655319  |
| C                | 1.395153                | -1.572724 | 1.126830  |
| H                | 2.206752                | -1.478873 | 1.847230  |
| H                | 0.455565                | -1.519240 | 1.689154  |
| H                | 1.457830                | -2.553293 | 0.656861  |

-----  
-  
-----  
-

(SiH3)2Tl-Sb

---

-

| Atomic<br>Number | Coordinates (Angstroms) |           |           |
|------------------|-------------------------|-----------|-----------|
|                  | X                       | Y         | Z         |
| Si               | 1.866238                | -2.207489 | 0.000750  |
| H                | 2.740909                | -2.247416 | -1.191701 |
| H                | 2.713662                | -2.257479 | 1.212500  |
| H                | 0.990973                | -3.398742 | -0.014414 |
| Si               | 1.837582                | 2.224832  | 0.000760  |
| H                | 2.682541                | 2.286809  | 1.213643  |
| H                | 2.713335                | 2.273878  | -1.190588 |
| H                | 0.947463                | 3.405108  | -0.017208 |
| Tl               | 0.541014                | -0.000396 | -0.000596 |
| Sb               | -2.126756               | -0.005351 | 0.000292  |

---

(SiH3)2Tl-Sb (TS1)

---

-

| Atomic<br>Number | Coordinates (Angstroms) |           |           |
|------------------|-------------------------|-----------|-----------|
|                  | X                       | Y         | Z         |
| Si               | -3.209305               | -0.131694 | 0.000029  |
| H                | -3.671855               | 0.469011  | 1.265713  |
| H                | -3.678566               | 0.669993  | -1.144940 |
| H                | -3.716778               | -1.510465 | -0.112653 |
| Si               | 0.728450                | 2.168111  | -0.000053 |
| H                | 0.867578                | 3.000330  | -1.215037 |
| H                | 0.862272                | 3.006991  | 1.210300  |

---

|    |           |           |           |
|----|-----------|-----------|-----------|
| H  | 2.192271  | 1.601027  | 0.006698  |
| Tl | -0.696584 | -0.144623 | -0.000158 |
| Sb | 1.927458  | -0.471221 | 0.000060  |

H3Si-Tl-Sb-SiH3

| Atomic<br>Number | Coordinates (Angstroms) |   |   |
|------------------|-------------------------|---|---|
|                  | X                       | Y | Z |

|    |           |           |           |
|----|-----------|-----------|-----------|
| Tl | 0.786167  | -0.202851 | 0.000959  |
| Sb | -1.848002 | -0.524868 | -0.000815 |
| Si | -1.600125 | 2.056299  | 0.000236  |
| H  | -2.197830 | 2.691283  | -1.195494 |
| H  | -2.196988 | 2.690106  | 1.197213  |
| H  | -0.159359 | 2.473108  | -0.000169 |
| Si | 3.299892  | 0.369177  | -0.002049 |
| H  | 3.657912  | 1.072327  | 1.245995  |
| H  | 4.048695  | -0.901938 | -0.090120 |
| H  | 3.619405  | 1.217703  | -1.168154 |

Tl-Sb(SiH3)2 (TS2)

| Atomic<br>Number | Coordinates (Angstroms) |   |   |
|------------------|-------------------------|---|---|
|                  | X                       | Y | Z |

|    |           |           |           |
|----|-----------|-----------|-----------|
| Tl | -1.026456 | -0.567653 | 0.056679  |
| Sb | 1.656209  | 0.051464  | -0.666949 |
| Si | -1.676426 | 2.081803  | -0.218770 |
| H  | -1.721212 | 2.377702  | -1.667824 |
| H  | -3.049771 | 2.214169  | 0.319199  |
| H  | -0.822590 | 3.071668  | 0.473811  |
| Si | 1.634492  | 0.372482  | 1.869192  |
| H  | 0.236908  | 0.391510  | 2.409624  |
| H  | 2.351578  | -0.726286 | 2.559702  |
| H  | 2.268428  | 1.666440  | 2.222980  |

-----  
-  
-----  
-  
Tl-Sb(SiH3)2  
-----  
-

| Atomic<br>Number | Coordinates (Angstroms) |           |           |
|------------------|-------------------------|-----------|-----------|
|                  | X                       | Y         | Z         |
| Tl               | 1.482469                | -0.000019 | -0.053596 |
| Sb               | -1.544044               | 0.000192  | -0.720770 |
| Si               | -1.236398               | -1.717843 | 1.135415  |
| H                | 0.165394                | -1.680563 | 1.692678  |
| H                | -2.106227               | -1.494033 | 2.310514  |
| H                | -1.418269               | -3.102126 | 0.646629  |
| Si               | -1.236211               | 1.717355  | 1.135954  |
| H                | -2.108894               | 1.495700  | 2.309305  |
| H                | 0.164586                | 1.677578  | 1.695760  |
| H                | -1.413828               | 3.102040  | 0.646522  |

-----  
-  
-----  
-

B3PW91/Def2-TZVP

-----  
-  
F2Tl-Sb  
-----

-  
Atomic Coordinates (Angstroms)  
Number X Y Z  
-----

-  
Tl -0.759055 -0.002373 -0.000003  
Sb 1.928791 -0.001299 0.000001  
F -2.031108 1.588315 0.000008  
F -2.067209 -1.559603 0.000009  
-----

-----  
-  
F2Tl-Sb (TS1)  
-----

-  
Atomic Coordinates (Angstroms)  
Number X Y Z  
-----

-  
Tl -0.779389 -0.073616 -0.000024  
Sb 1.901869 -0.062488 0.000013  
F -1.171660 1.966472 0.000042  
F -2.591096 -0.949830 0.000099  
-----

-----  
-  
F-Tl-Sb-F  
-----

---

-

| Atomic<br>Number | Coordinates (Angstroms) |           |           |
|------------------|-------------------------|-----------|-----------|
|                  | X                       | Y         | Z         |
| Tl               | -0.973678               | -0.026999 | -0.000001 |
| Sb               | 1.741289                | -0.283252 | -0.000006 |
| F                | 1.883762                | 1.658623  | -0.000006 |
| F                | -2.987965               | 0.189463  | 0.000051  |

---

-

---

-

Tl-SbF2 (TS2)

---

-

| Atomic<br>Number | Coordinates (Angstroms) |           |           |
|------------------|-------------------------|-----------|-----------|
|                  | X                       | Y         | Z         |
| Tl               | 1.407623                | -0.158369 | 0.000004  |
| Sb               | -1.710796               | 0.194757  | 0.000087  |
| F                | -0.092580               | 1.728742  | -0.000269 |
| F                | -2.881518               | -1.407047 | -0.000266 |

---

-

---

-

Tl-SbF2

---

-

| Atomic<br>Number | Coordinates (Angstroms) |   |   |
|------------------|-------------------------|---|---|
|                  | X                       | Y | Z |

---

-

|    |           |           |           |
|----|-----------|-----------|-----------|
| Sb | 1.708819  | -0.001418 | -0.250714 |
| Tl | -1.284342 | 0.000064  | -0.054764 |
| F  | 0.940608  | 1.377573  | 0.953479  |
| F  | 0.935163  | -1.370119 | 0.960113  |

---

(OH)<sub>2</sub>Tl-Sb

---

-

| Atomic<br>Number | Coordinates (Angstroms) |           |           |
|------------------|-------------------------|-----------|-----------|
|                  | X                       | Y         | Z         |
| Tl               | -0.742993               | -0.000025 | 0.000005  |
| Sb               | 1.935158                | 0.000034  | -0.000012 |
| O                | -2.038630               | -1.635661 | 0.000020  |
| H                | -2.944974               | -1.308590 | -0.000016 |
| O                | -2.038906               | 1.635672  | 0.000003  |
| H                | -2.945344               | 1.308783  | 0.000051  |

---

(OH)<sub>2</sub>Tl-Sb (TS1)

---

-

| Atomic<br>Number | Coordinates (Angstroms) |           |           |
|------------------|-------------------------|-----------|-----------|
|                  | X                       | Y         | Z         |
| Tl               | -0.779650               | -0.086437 | -0.018823 |
| Sb               | 1.898932                | -0.076204 | 0.012544  |

|   |           |           |           |
|---|-----------|-----------|-----------|
| O | -0.926359 | 2.036437  | -0.028831 |
| H | -1.736984 | 2.287309  | 0.429751  |
| O | -2.726004 | -0.747549 | 0.074883  |
| H | -2.738028 | -1.710590 | 0.086804  |

HO-Tl-Sb-OH

| Atomic<br>Number | Coordinates (Angstroms) |   |   |
|------------------|-------------------------|---|---|
|                  | X                       | Y | Z |

|    |           |           |           |
|----|-----------|-----------|-----------|
| Tl | -0.974884 | -0.042769 | -0.010909 |
| Sb | 1.734304  | -0.291871 | 0.009554  |
| O  | 1.986290  | 1.686250  | -0.117471 |
| H  | 2.047281  | 2.057868  | 0.767651  |
| O  | -3.000490 | 0.301552  | 0.159253  |
| H  | -3.417627 | 0.389482  | -0.705560 |

Tl-Sb(OH)<sub>2</sub> (TS2)

| Atomic<br>Number | Coordinates (Angstroms) |   |   |
|------------------|-------------------------|---|---|
|                  | X                       | Y | Z |

|    |           |           |           |
|----|-----------|-----------|-----------|
| Tl | 1.417601  | -0.173618 | 0.000027  |
| Sb | -1.729612 | 0.210264  | 0.000897  |
| O  | -3.018973 | -1.346838 | -0.002907 |



|   |           |           |           |
|---|-----------|-----------|-----------|
| H | -2.582442 | -2.204846 | -0.002484 |
| O | 0.007277  | 1.706440  | -0.001712 |
| H | 0.060533  | 2.667659  | -0.008500 |

Tl-Sb(OH)<sub>2</sub>

| Atomic<br>Number | Coordinates (Angstroms) |   |   |
|------------------|-------------------------|---|---|
|                  | X                       | Y | Z |

|    |           |           |           |
|----|-----------|-----------|-----------|
| Sb | -1.663841 | 0.004838  | -0.341979 |
| Tl | 1.380050  | -0.003453 | -0.010131 |
| O  | -1.370552 | 1.534822  | 0.975515  |
| H  | -2.217182 | 1.831613  | 1.338358  |
| O  | -1.432773 | -1.537069 | 0.969953  |
| H  | -2.284370 | -1.780678 | 1.359406  |

H<sub>2</sub>Tl-Sb

| Atomic<br>Number | Coordinates (Angstroms) |   |   |
|------------------|-------------------------|---|---|
|                  | X                       | Y | Z |

|    |           |           |           |
|----|-----------|-----------|-----------|
| Tl | 0.998425  | 0.000000  | 0.000014  |
| H  | 1.923802  | -1.473605 | 0.000027  |
| Sb | -1.661176 | 0.000000  | -0.000023 |
| H  | 1.923761  | 1.473634  | 0.000027  |

H2Tl-Sb (TS1)

| Atomic<br>Number | Coordinates (Angstroms) |           |           |
|------------------|-------------------------|-----------|-----------|
|                  | X                       | Y         | Z         |
| Tl               | 0.990251                | -0.005423 | 0.000047  |
| H                | 2.397661                | -0.979045 | 0.000109  |
| Sb               | -1.644622               | -0.006627 | -0.000077 |
| H                | 1.267722                | 1.756309  | 0.000064  |

H-Tl-Sb-H

| Atomic<br>Number | Coordinates (Angstroms) |           |          |
|------------------|-------------------------|-----------|----------|
|                  | X                       | Y         | Z        |
| Tl               | -1.002151               | -0.003267 | 0.000000 |
| H                | -2.733968               | 0.063838  | 0.000001 |
| Sb               | 1.618378                | -0.028992 | 0.000000 |
| H                | 1.370894                | 1.679382  | 0.000000 |

Tl-SbH2 (TS2)

---

-

| Atomic<br>Number | Coordinates (Angstroms) |           |           |
|------------------|-------------------------|-----------|-----------|
|                  | X                       | Y         | Z         |
| Tl               | 1.110983                | -0.020430 | 0.004517  |
| Sb               | -1.753837               | -0.014288 | -0.025363 |
| H                | -1.417190               | 0.664012  | 1.521597  |
| H                | 0.873257                | 1.719507  | -0.593987 |

---

-

---

-

Tl-SbH<sub>2</sub>

---

-

| Atomic<br>Number | Coordinates (Angstroms) |           |           |
|------------------|-------------------------|-----------|-----------|
|                  | X                       | Y         | Z         |
| Tl               | -1.188415               | 0.000001  | -0.002330 |
| Sb               | 1.825564                | -0.000010 | -0.041529 |
| H                | 1.579035                | 1.216176  | 1.153155  |
| H                | 1.578818                | -1.215719 | 1.153605  |

---

-

---

-

(CH<sub>3</sub>)<sub>2</sub>Tl-Sb

---

-

| Atomic<br>Number | Coordinates (Angstroms) |   |   |
|------------------|-------------------------|---|---|
|                  | X                       | Y | Z |

---

|    |           |           |           |
|----|-----------|-----------|-----------|
| Tl | -0.737099 | -0.000058 | -0.000179 |
| Sb | 1.918777  | -0.000088 | 0.000091  |
| C  | -2.048595 | 1.810695  | -0.001560 |
| H  | -2.369640 | 1.981147  | 1.026751  |
| H  | -1.497518 | 2.672210  | -0.372490 |
| H  | -2.910811 | 1.599805  | -0.633367 |
| C  | -2.049655 | -1.809989 | 0.002360  |
| H  | -2.882051 | -1.618019 | 0.678798  |
| H  | -2.417652 | -1.946290 | -1.015240 |
| H  | -1.485427 | -2.683854 | 0.320650  |

(CH3)2Tl-Sb (TS1)

| Atomic<br>Number | Coordinates (Angstroms) |           |           |
|------------------|-------------------------|-----------|-----------|
|                  | X                       | Y         | Z         |
| Tl               | 0.747513                | -0.067613 | -0.000037 |
| Sb               | -1.882775               | -0.094044 | 0.000020  |
| C                | 1.131758                | 2.205133  | 0.000131  |
| H                | 1.729117                | 2.388510  | 0.891722  |
| H                | 1.706763                | 2.392573  | -0.905193 |
| H                | 0.223767                | 2.800458  | 0.012718  |
| C                | 2.675611                | -1.118405 | -0.000152 |
| H                | 3.206679                | -0.852148 | 0.913063  |
| H                | 2.517077                | -2.193204 | -0.044096 |
| H                | 3.245328                | -0.783620 | -0.866153 |

-  
H3C-Tl-Sb-CH3  
-----  
-

| Atomic<br>Number | Coordinates (Angstroms) |           |           |
|------------------|-------------------------|-----------|-----------|
|                  | X                       | Y         | Z         |
| Tl               | -0.939453               | -0.006443 | 0.000443  |
| Sb               | 1.678391                | -0.365511 | -0.000308 |
| C                | 2.150352                | 1.791822  | -0.000088 |
| H                | 1.785012                | 2.288759  | 0.895345  |
| H                | 3.240849                | 1.823362  | 0.001470  |
| H                | 1.787807                | 2.289151  | -0.896480 |
| C                | -3.129112               | 0.214069  | -0.001735 |
| H                | -3.428567               | 0.808147  | -0.864338 |
| H                | -3.571026               | -0.780878 | -0.066840 |
| H                | -3.443772               | 0.699083  | 0.921573  |

-----  
-  
-----  
-

Tl-Sb(CH3)2 (TS2)  
-----  
-

| Atomic<br>Number | Coordinates (Angstroms) |           |           |
|------------------|-------------------------|-----------|-----------|
|                  | X                       | Y         | Z         |
| Tl               | -1.179978               | -0.236773 | 0.045213  |
| Sb               | 1.720085                | -0.078946 | -0.358209 |
| C                | 1.898890                | 0.298234  | 1.794929  |
| H                | 2.393004                | -0.571125 | 2.251101  |
| H                | 2.556534                | 1.164842  | 1.943718  |
| H                | 0.941677                | 0.472649  | 2.304377  |

|   |           |          |           |
|---|-----------|----------|-----------|
| C | -1.033851 | 2.150102 | -0.283072 |
| H | -2.066069 | 2.398697 | -0.016544 |
| H | -0.830633 | 2.391433 | -1.330948 |
| H | -0.330835 | 2.658339 | 0.383603  |

-----  
-  
-----  
-  
Tl-Sb(CH<sub>3</sub>)<sub>2</sub>  
-----

-----  
-  
Atomic Coordinates (Angstroms)  
Number X Y Z  
-----

|    |           |           |           |
|----|-----------|-----------|-----------|
| Tl | -1.384070 | -0.000126 | 0.010443  |
| Sb | 1.591084  | 0.000168  | -0.424815 |
| C  | 1.706218  | 1.604320  | 1.073302  |
| H  | 0.967341  | 1.503613  | 1.872307  |
| H  | 2.701362  | 1.583837  | 1.520850  |
| H  | 1.566877  | 2.566572  | 0.577668  |
| C  | 1.708150  | -1.604122 | 1.073115  |
| H  | 2.700337  | -1.578029 | 1.525844  |
| H  | 0.964836  | -1.508934 | 1.868186  |
| H  | 1.577442  | -2.566608 | 0.576307  |

-----  
-  
-----  
-  
(SiH<sub>3</sub>)<sub>2</sub>Tl-Sb  
-----

-----  
-  
Atomic Coordinates (Angstroms)  
Number X Y Z  
-----

|    |           |           |           |
|----|-----------|-----------|-----------|
| Si | -1.989640 | -2.126567 | -0.001469 |
| H  | -2.796057 | -2.149758 | 1.248502  |
| H  | -2.914149 | -2.069879 | -1.167321 |
| H  | -1.190135 | -3.377948 | -0.083456 |
| Si | -1.957500 | 2.147715  | -0.001433 |
| H  | -2.853284 | 2.120722  | -1.189084 |
| H  | -2.793683 | 2.165333  | 1.228269  |
| H  | -1.139779 | 3.388181  | -0.045070 |
| Tl | -0.492390 | -0.001491 | 0.000974  |
| Sb | 2.133934  | -0.004941 | -0.000591 |

(SiH3)2Tl-Sb (TS1)

| Atomic<br>Number | Coordinates (Angstroms) |           |           |
|------------------|-------------------------|-----------|-----------|
|                  | X                       | Y         | Z         |
| Si               | 3.226498                | -0.110439 | 0.003298  |
| H                | 3.705658                | 0.630034  | -1.189724 |
| H                | 3.697221                | 0.565336  | 1.238021  |
| H                | 3.750923                | -1.496925 | -0.031349 |
| Si               | -0.727062               | 2.149234  | 0.000316  |
| H                | -0.881267               | 2.988581  | 1.218987  |
| H                | -0.884295               | 2.986573  | -1.219598 |
| H                | -2.209508               | 1.584990  | 0.002771  |
| Tl               | 0.694506                | -0.151766 | -0.001549 |
| Sb               | -1.929918               | -0.460954 | 0.001094  |

-  
H3Si-Tl-Sb-SiH3

-----

-

| Atomic<br>Number | Coordinates (Angstroms) |           |           |
|------------------|-------------------------|-----------|-----------|
|                  | X                       | Y         | Z         |
| Tl               | 0.777897                | -0.199280 | 0.000230  |
| Sb               | -1.831268               | -0.527124 | -0.000192 |
| Si               | -1.618683               | 2.042374  | 0.000036  |
| H                | -2.231166               | 2.667090  | -1.203667 |
| H                | -2.233503               | 2.666774  | 1.202725  |
| H                | -0.184041               | 2.493527  | 0.001587  |
| Si               | 3.308311                | 0.372151  | -0.000476 |
| H                | 3.665461                | 1.130878  | 1.224760  |
| H                | 4.059603                | -0.909593 | -0.026147 |
| H                | 3.653869                | 1.172996  | -1.201959 |

-----

-  
-----  
Tl-Sb(SiH3)2 (TS2)

-----

| Atomic<br>Number | Coordinates (Angstroms) |           |           |
|------------------|-------------------------|-----------|-----------|
|                  | X                       | Y         | Z         |
| Tl               | -1.038564               | -0.565121 | -0.117680 |
| Sb               | 1.571774                | 0.379885  | -0.642324 |
| Si               | -1.694014               | 2.001981  | 0.637773  |
| H                | -1.855540               | 2.769024  | -0.625067 |
| H                | -3.028460               | 1.866859  | 1.281831  |
| H                | -0.808996               | 2.737028  | 1.574619  |
| Si               | 1.946566                | -0.496066 | 1.743508  |



|   |          |           |          |
|---|----------|-----------|----------|
| H | 0.679808 | -0.796576 | 2.488847 |
| H | 2.730437 | -1.761335 | 1.690200 |
| H | 2.710231 | 0.502907  | 2.542239 |

-----  
-  
-----  
-  
Tl-Sb(SiH3)2 -----  
-----

| Atomic<br>Number | Coordinates (Angstroms) |   |   |
|------------------|-------------------------|---|---|
|                  | X                       | Y | Z |

|    |           |           |           |
|----|-----------|-----------|-----------|
| Tl | -1.458973 | 0.000011  | -0.062287 |
| Sb | 1.544486  | -0.000140 | -0.691482 |
| Si | 1.181573  | 1.769580  | 1.115731  |
| H  | -0.248849 | 1.781720  | 1.618900  |
| H  | 2.004007  | 1.590066  | 2.341764  |
| H  | 1.408243  | 3.135081  | 0.571191  |
| Si | 1.181423  | -1.769229 | 1.116099  |
| H  | 2.003945  | -1.589673 | 2.342071  |
| H  | -0.248966 | -1.780942 | 1.619379  |
| H  | 1.407726  | -3.134922 | 0.571884  |

-----  
-  
-----  
-  
B3LYP/LANL2DZ+dp  
-----

-  
F2Tl-Sb  
-----  
-

| Atomic | Coordinates (Angstroms) |  |  |
|--------|-------------------------|--|--|
|--------|-------------------------|--|--|

| Number | X         | Y         | Z         |
|--------|-----------|-----------|-----------|
| Tl     | -0.799547 | -0.000012 | -0.000001 |
| Sb     | 1.936842  | -0.000020 | 0.000001  |
| F      | -1.889574 | 1.528202  | 0.000004  |
| F      | -1.889939 | -1.527979 | 0.000004  |

F2Tl-Sb (TS1)

| Atomic<br>Number | Coordinates (Angstroms) |           |           |
|------------------|-------------------------|-----------|-----------|
|                  | X                       | Y         | Z         |
| Tl               | 0.819718                | -0.067876 | -0.000001 |
| Sb               | -1.881331               | -0.093441 | 0.000000  |
| F                | 0.725787                | 1.862647  | 0.000001  |
| F                | 2.557625                | -0.722269 | 0.000003  |

F-Tl-Sb-F

| Atomic<br>Number | Coordinates (Angstroms) |           |           |
|------------------|-------------------------|-----------|-----------|
|                  | X                       | Y         | Z         |
| Tl               | 0.993642                | -0.033108 | -0.000004 |
| Sb               | -1.752133               | -0.284439 | 0.000003  |

|   |           |          |           |
|---|-----------|----------|-----------|
| F | -1.859302 | 1.692382 | -0.000001 |
| F | 2.845282  | 0.217411 | 0.000023  |

-----  
-  
-----  
-  
Tl-SbF2 (TS2)

-----  
-  
Atomic Coordinates (Angstroms)  
Number X Y Z

|    |           |           |           |
|----|-----------|-----------|-----------|
| Tl | 1.462847  | -0.160721 | 0.000003  |
| Sb | -1.780532 | 0.191574  | 0.000068  |
| F  | 0.140306  | 1.552089  | -0.000205 |
| F  | -3.216242 | -1.191187 | -0.000209 |

-----  
-  
-----  
-  
Tl-SbF2

-----  
-  
Atomic Coordinates (Angstroms)  
Number X Y Z

|    |           |           |           |
|----|-----------|-----------|-----------|
| Sb | 1.771857  | -0.000377 | -0.198098 |
| Tl | -1.268265 | 0.000101  | -0.069211 |
| F  | 0.688445  | 1.357186  | 0.872199  |
| F  | 0.685421  | -1.355964 | 0.873250  |

(OH)2Tl-Sb

---

| Atomic<br>Number | Coordinates (Angstroms) |           |           |
|------------------|-------------------------|-----------|-----------|
|                  | X                       | Y         | Z         |
| Tl               | 0.790302                | -0.000024 | 0.000005  |
| Sb               | -1.943018               | -0.000017 | -0.000011 |
| O                | 1.842104                | 1.653878  | 0.000006  |
| H                | 2.801072                | 1.519536  | 0.000032  |
| O                | 1.842517                | -1.653629 | 0.000016  |
| H                | 2.801476                | -1.518717 | 0.000002  |

---

(OH)2Tl-Sb (TS1)

---

| Atomic<br>Number | Coordinates (Angstroms) |           |           |
|------------------|-------------------------|-----------|-----------|
|                  | X                       | Y         | Z         |
| Tl               | -0.816553               | -0.057958 | -0.014846 |
| Sb               | 1.902049                | -0.102907 | 0.009372  |
| O                | -0.722194               | 1.923490  | -0.029529 |
| H                | -1.435810               | 2.427701  | 0.389246  |
| O                | -2.620094               | -0.767499 | 0.062066  |
| H                | -2.689640               | -1.732740 | 0.075032  |

---

## HO-Tl-Sb-OH

---

-

| Atomic<br>Number | Coordinates (Angstroms) |           |           |
|------------------|-------------------------|-----------|-----------|
|                  | X                       | Y         | Z         |
| Tl               | -0.996869               | -0.036661 | -0.004807 |
| Sb               | 1.750246                | -0.299711 | 0.004367  |
| O                | 2.009152                | 1.694751  | -0.114445 |
| H                | 2.103713                | 2.078369  | 0.770245  |
| O                | -2.910058               | 0.277606  | 0.125796  |
| H                | -3.412596               | 0.397590  | -0.694429 |

---

-

Tl-Sb(OH)<sub>2</sub> (TS2)

---

-

| Atomic<br>Number | Coordinates (Angstroms) |           |           |
|------------------|-------------------------|-----------|-----------|
|                  | X                       | Y         | Z         |
| Tl               | 1.449278                | -0.178778 | 0.000001  |
| Sb               | -1.773645               | 0.212522  | 0.000028  |
| O                | -3.226997               | -1.198074 | -0.000109 |
| H                | -2.897352               | -2.110813 | 0.000108  |
| O                | 0.179719                | 1.597954  | -0.000120 |
| H                | 0.339940                | 2.554187  | 0.000167  |

---

-

Tl-Sb(OH)<sub>2</sub>

---

-

| Atomic<br>Number | Coordinates (Angstroms) |           |           |
|------------------|-------------------------|-----------|-----------|
|                  | X                       | Y         | Z         |
| Sb               | -1.669205               | 0.004194  | -0.349646 |
| Tl               | 1.393411                | -0.003264 | -0.007334 |
| O                | -1.415329               | 1.545304  | 0.986849  |
| H                | -2.275916               | 1.846527  | 1.321739  |
| O                | -1.475001               | -1.546653 | 0.981526  |
| H                | -2.338254               | -1.785243 | 1.357232  |

---

-

---

-

H2Tl-Sb

---

-

| Atomic<br>Number | Coordinates (Angstroms) |           |           |
|------------------|-------------------------|-----------|-----------|
|                  | X                       | Y         | Z         |
| Tl               | 1.014406                | -0.000001 | 0.000014  |
| H                | 1.875087                | -1.492028 | 0.000026  |
| Sb               | -1.684644               | -0.000001 | -0.000023 |
| H                | 1.874879                | 1.492159  | 0.000026  |

---

-

---

-

H2Tl-Sb (TS1)

---

-

| Atomic | Coordinates (Angstroms) |  |  |
|--------|-------------------------|--|--|
|--------|-------------------------|--|--|

| Number | X         | Y         | Z         |
|--------|-----------|-----------|-----------|
| -      |           |           |           |
| Tl     | 0.995776  | -0.004614 | 0.000047  |
| H      | 2.428159  | -0.914120 | 0.000110  |
| Sb     | -1.649069 | -0.009436 | -0.000078 |
| H      | 1.016467  | 1.769118  | 0.000057  |

H-Tl-Sb-H

| Atomic<br>Number | Coordinates (Angstroms) |           |           |
|------------------|-------------------------|-----------|-----------|
|                  | X                       | Y         | Z         |
| --               |                         |           |           |
| Tl               | -1.002171               | -0.003233 | 0.000000  |
| H                | -2.727977               | 0.061592  | 0.000001  |
| Sb               | 1.618295                | -0.029223 | -0.000001 |
| H                | 1.370754                | 1.690659  | 0.000000  |

Tl-SbH<sub>2</sub> (TS2)

| Atomic<br>Number | Coordinates (Angstroms) |           |           |
|------------------|-------------------------|-----------|-----------|
|                  | X                       | Y         | Z         |
| -                |                         |           |           |
| Tl               | 1.112282                | -0.019670 | 0.005200  |
| Sb               | -1.754765               | -0.015767 | -0.025010 |

|   |           |          |           |
|---|-----------|----------|-----------|
| H | -1.432274 | 0.720274 | 1.509753  |
| H | 0.830418  | 1.677107 | -0.655452 |

-----  
-  
-----  
-  
Tl-SbH2  
-----

| Atomic<br>Number | Coordinates (Angstroms) |   |   |
|------------------|-------------------------|---|---|
|                  | X                       | Y | Z |

-----  
--  

|    |           |           |           |
|----|-----------|-----------|-----------|
| Tl | 1.194555  | 0.000000  | -0.002236 |
| Sb | -1.834570 | -0.000004 | -0.041914 |
| H  | -1.597881 | -1.229029 | 1.159475  |
| H  | -1.597992 | 1.229228  | 1.159279  |

-----  
-  
-----  
-  
(CH3)2Tl-Sb  
-----

| Atomic<br>Number | Coordinates (Angstroms) |   |   |
|------------------|-------------------------|---|---|
|                  | X                       | Y | Z |

-----  
-  

|    |           |           |           |
|----|-----------|-----------|-----------|
| Tl | 0.776364  | 0.000125  | -0.001534 |
| Sb | -1.937798 | -0.000264 | 0.000698  |
| C  | 1.925358  | 1.857056  | 0.004722  |
| H  | 2.524091  | 1.896426  | -0.914765 |
| H  | 1.283659  | 2.742595  | 0.059120  |
| H  | 2.603678  | 1.842910  | 0.867791  |
| C  | 1.931342  | -1.853854 | 0.002486  |



|   |          |           |           |
|---|----------|-----------|-----------|
| H | 2.961821 | -1.636520 | -0.304477 |
| H | 1.937316 | -2.271073 | 1.017907  |
| H | 1.491437 | -2.590209 | -0.680214 |

(CH3)2Tl-Sb (TS1)

| Atomic<br>Number | Coordinates (Angstroms) |   |   |
|------------------|-------------------------|---|---|
|                  | X                       | Y | Z |

|    |           |           |           |
|----|-----------|-----------|-----------|
| Tl | 0.776556  | -0.052902 | -0.000224 |
| Sb | -1.865002 | -0.143089 | 0.000120  |
| C  | 0.745471  | 2.212785  | 0.000365  |
| H  | 1.314583  | 2.510393  | 0.890091  |
| H  | 1.275548  | 2.513335  | -0.912146 |
| H  | -0.237716 | 2.695272  | 0.022859  |
| C  | 2.708783  | -0.995301 | 0.000504  |
| H  | 3.241320  | -0.717932 | 0.918749  |
| H  | 2.611772  | -2.084650 | -0.049204 |
| H  | 3.283028  | -0.638731 | -0.863511 |

H3C-Tl-Sb-CH3

| Atomic<br>Number | Coordinates (Angstroms) |   |   |
|------------------|-------------------------|---|---|
|                  | X                       | Y | Z |

|    |           |           |           |
|----|-----------|-----------|-----------|
| Tl | 0.943719  | -0.004202 | 0.000040  |
| Sb | -1.679978 | -0.370914 | -0.000030 |
| C  | -2.155603 | 1.805403  | -0.000023 |
| H  | -1.793239 | 2.311821  | -0.900296 |
| H  | -3.252860 | 1.846526  | 0.002039  |
| H  | -1.789754 | 2.312383  | 0.898541  |
| C  | 3.101414  | 0.207809  | -0.000190 |
| H  | 3.423567  | 0.741742  | 0.902197  |
| H  | 3.553481  | -0.793021 | -0.009785 |
| H  | 3.421601  | 0.758254  | -0.893150 |

-----  
 -  
 -----  
 -  
 Tl-Sb(CH<sub>3</sub>)<sub>2</sub> (TS2)  
 -----  
 -

| Atomic<br>Number | Coordinates (Angstroms) |           |           |
|------------------|-------------------------|-----------|-----------|
|                  | X                       | Y         | Z         |
| Tl               | -1.179978               | -0.236773 | 0.045213  |
| Sb               | 1.720085                | -0.078946 | -0.358209 |
| C                | 1.898890                | 0.298234  | 1.794929  |
| H                | 2.393004                | -0.571125 | 2.251101  |
| H                | 2.556534                | 1.164842  | 1.943718  |
| H                | 0.941677                | 0.472649  | 2.304377  |
| C                | -1.033851               | 2.150102  | -0.283072 |
| H                | -2.066069               | 2.398697  | -0.016544 |
| H                | -0.830633               | 2.391433  | -1.330948 |
| H                | -0.330835               | 2.658339  | 0.383603  |

-----  
 -  
 -----  
 -

Tl-Sb(CH<sub>3</sub>)<sub>2</sub>

---

-

| Atomic<br>Number | Coordinates (Angstroms) |           |           |
|------------------|-------------------------|-----------|-----------|
|                  | X                       | Y         | Z         |
| Tl               | 1.384500                | -0.000379 | 0.007264  |
| Sb               | -1.601879               | 0.000244  | -0.426927 |
| C                | -1.683698               | -1.610103 | 1.090703  |
| H                | -0.911353               | -1.518875 | 1.868764  |
| H                | -2.663806               | -1.580747 | 1.583833  |
| H                | -1.575001               | -2.586347 | 0.600279  |
| C                | -1.677782               | 1.611992  | 1.089704  |
| H                | -2.658388               | 1.586809  | 1.582519  |
| H                | -0.906147               | 1.518483  | 1.868521  |
| H                | -1.565122               | 2.587627  | 0.598597  |

---

(SiH<sub>3</sub>)<sub>2</sub>Tl-Sb

---

-

| Atomic<br>Number | Coordinates (Angstroms) |           |           |
|------------------|-------------------------|-----------|-----------|
|                  | X                       | Y         | Z         |
| Si               | -1.903346               | -2.205362 | 0.001072  |
| H                | -2.771723               | -2.243049 | 1.205674  |
| H                | -2.768507               | -2.249192 | -1.205591 |
| H                | -1.036984               | -3.409868 | 0.005310  |
| Si               | -1.869422               | 2.226236  | 0.001027  |
| H                | -2.738963               | 2.281260  | -1.202094 |
| H                | -2.732060               | 2.279462  | 1.209269  |

|    |           |           |           |
|----|-----------|-----------|-----------|
| H  | -0.985033 | 3.417624  | -0.000622 |
| Tl | -0.530674 | -0.000684 | -0.000760 |
| Sb | 2.134051  | -0.006139 | 0.000396  |

(SiH3)2Tl-Sb (TS1)

| Atomic<br>Number | Coordinates (Angstroms) |           |           |
|------------------|-------------------------|-----------|-----------|
|                  | X                       | Y         | Z         |
| Si               | 3.211570                | -0.292935 | 0.001083  |
| H                | 3.755502                | 0.366759  | -1.209506 |
| H                | 3.753384                | 0.369378  | 1.211128  |
| H                | 3.606457                | -1.720343 | 0.003005  |
| Si               | -0.699517               | 2.201025  | 0.000244  |
| H                | -0.730413               | 3.038561  | 1.225255  |
| H                | -0.731616               | 3.037557  | -1.225430 |
| H                | -2.162967               | 1.685021  | 0.001545  |
| Tl               | 0.681429                | -0.085490 | -0.000504 |
| Sb               | -1.918723               | -0.520891 | 0.000318  |

H3Si-Tl-Sb-SiH3

| Atomic<br>Number | Coordinates (Angstroms) |           |           |
|------------------|-------------------------|-----------|-----------|
|                  | X                       | Y         | Z         |
| Tl               | -0.794512               | -0.172714 | -0.001076 |
| Sb               | 1.802805                | -0.572421 | 0.000904  |
| Si               | 1.793928                | 2.031510  | -0.000088 |
| H                | 2.467784                | 2.587280  | 1.202353  |
| H                | 2.472308                | 2.585144  | -1.201028 |
| H                | 0.410932                | 2.604262  | -0.003633 |
| Si               | -3.329590               | 0.393649  | 0.002407  |
| H                | -3.686148               | 1.162044  | -1.214271 |

|   |           |           |          |
|---|-----------|-----------|----------|
| H | -4.076629 | -0.888261 | 0.015145 |
| H | -3.676535 | 1.180631  | 1.209979 |

-----  
 -----  
 Tl-Sb(SiH3)2 (TS2)

| Atomic<br>Number | Coordinates (Angstroms) |           |           |
|------------------|-------------------------|-----------|-----------|
|                  | X                       | Y         | Z         |
| Tl               | -1.072836               | -0.575437 | -0.071497 |
| Sb               | 1.530092                | 0.365450  | -0.687343 |
| Si               | -1.676865               | 2.034901  | 0.629171  |
| H                | -1.889859               | 2.760720  | -0.649767 |
| H                | -2.985679               | 1.918356  | 1.326118  |
| H                | -0.766256               | 2.812203  | 1.504816  |
| Si               | 2.205556                | -0.440089 | 1.672377  |
| H                | 1.056196                | -0.688104 | 2.593146  |
| H                | 2.951357                | -1.720134 | 1.535091  |
| H                | 3.097566                | 0.561992  | 2.314642  |

-----  
 -----  
 Tl-Sb(SiH3)2

| Atomic<br>Number | Coordinates (Angstroms) |           |           |
|------------------|-------------------------|-----------|-----------|
|                  | X                       | Y         | Z         |
| Tl               | -1.494017               | -0.000544 | -0.024256 |
| Sb               | 1.484998                | 0.000585  | -0.729405 |
| Si               | 1.340715                | 1.830630  | 1.084388  |
| H                | -0.037029               | 1.931894  | 1.684687  |
| H                | 2.258550                | 1.613182  | 2.231294  |
| H                | 1.614050                | 3.162691  | 0.485995  |
| Si               | 1.344593                | -1.829765 | 1.084261  |
| H                | 2.269380                | -1.615736 | 2.226219  |
| H                | -0.030070               | -1.927874 | 1.691819  |

H 1.611275 -3.162077 0.483312

---

---

B97D3/LANL2DZ+dp

---

(SiMe(SitBu3)2)2Tl-Sb

---

| Atomic<br>Number | Coordinates (Angstroms) |           |           |
|------------------|-------------------------|-----------|-----------|
|                  | X                       | Y         | Z         |
| Tl               | 1.020571                | 0.548831  | 1.045916  |
| Sb               | -1.086238               | 0.081658  | 3.430207  |
| Si               | 2.071210                | 0.121353  | -3.647309 |
| Si               | -1.902481               | 1.991217  | -2.020199 |
| Si               | 4.042701                | -1.630809 | 3.608028  |
| Si               | 3.632936                | 3.100870  | 3.248951  |
| C                | 1.382447                | -0.228607 | -5.457710 |
| C                | 3.281111                | 1.683604  | -3.657397 |
| C                | 3.098023                | -1.469228 | -3.058187 |
| C                | -3.062541               | 1.448305  | -3.521655 |
| C                | -1.320041               | 3.855443  | -2.197326 |
| C                | 3.861541                | -1.448307 | 5.550973  |
| C                | 2.713171                | -2.965601 | 2.961224  |
| C                | 5.854667                | -2.287876 | 3.132389  |
| C                | 1.878491                | 3.617047  | 3.995748  |
| C                | 3.987126                | 4.260150  | 1.682389  |
| C                | 5.069240                | 3.305129  | 4.571854  |
| C                | -2.936555               | 1.830134  | -0.335946 |
| C                | 0.207041                | -1.239506 | -5.427832 |
| H                | 0.552380                | -2.259492 | -5.209513 |
| H                | -0.287025               | -1.263110 | -6.418157 |
| H                | -0.563167               | -0.991836 | -4.686026 |
| C                | 0.905889                | 1.100975  | -6.093316 |
| H                | 1.759017                | 1.711576  | -6.427921 |

|   |           |           |           |
|---|-----------|-----------|-----------|
| H | 0.305539  | 1.716357  | -5.411457 |
| H | 0.281926  | 0.893155  | -6.983754 |
| C | 2.443770  | -0.821791 | -6.418877 |
| H | 3.342729  | -0.194997 | -6.500895 |
| H | 2.000655  | -0.897478 | -7.431305 |
| H | 2.756553  | -1.835164 | -6.127876 |
| C | 2.389412  | -2.803692 | -3.401669 |
| H | 2.944449  | -3.634860 | -2.926002 |
| H | 2.377148  | -3.006608 | -4.481732 |
| H | 1.355758  | -2.846930 | -3.033112 |
| C | 4.503283  | -1.532417 | -3.712281 |
| H | 5.164539  | -0.721721 | -3.374213 |
| H | 4.464979  | -1.505455 | -4.810255 |
| H | 4.987961  | -2.485868 | -3.424449 |
| C | 3.301849  | -1.473224 | -1.532253 |
| H | 3.778898  | -0.561774 | -1.152760 |
| H | 3.947563  | -2.325033 | -1.249296 |
| H | 2.349759  | -1.598913 | -1.000939 |
| C | 4.084545  | 1.725173  | -2.342504 |
| H | 3.415874  | 1.646279  | -1.471537 |
| H | 4.624465  | 2.688139  | -2.260508 |
| H | 4.835035  | 0.925350  | -2.272363 |
| C | 4.279875  | 1.698047  | -4.839738 |
| H | 4.970890  | 2.554985  | -4.715484 |
| H | 3.771854  | 1.835064  | -5.806699 |
| H | 4.893637  | 0.788883  | -4.901903 |
| C | 2.490866  | 3.005995  | -3.714979 |
| H | 3.195299  | 3.859086  | -3.658416 |
| H | 1.799628  | 3.097480  | -2.866998 |
| H | 1.916312  | 3.119503  | -4.644343 |
| C | -4.391138 | 2.350668  | -0.477539 |
| H | -4.448891 | 3.383720  | -0.850100 |
| H | -4.870625 | 2.331505  | 0.522409  |
| H | -5.000862 | 1.711573  | -1.135358 |
| C | -3.045576 | 0.354722  | 0.118095  |

|   |           |           |           |
|---|-----------|-----------|-----------|
| H | -2.059908 | -0.075177 | 0.374939  |
| H | -3.527913 | -0.299372 | -0.627668 |
| H | -3.652589 | 0.292399  | 1.055087  |
| C | -2.293750 | 2.621256  | 0.831033  |
| H | -2.809632 | 2.366642  | 1.773900  |
| H | -2.381334 | 3.704907  | 0.693037  |
| H | -1.238217 | 2.380078  | 0.972124  |
| C | -3.707429 | 0.070652  | -3.233395 |
| H | -2.957725 | -0.695698 | -2.976352 |
| H | -4.238799 | -0.281039 | -4.139806 |
| H | -4.447341 | 0.111011  | -2.418877 |
| C | -4.185163 | 2.457136  | -3.854946 |
| H | -3.777655 | 3.428722  | -4.174472 |
| H | -4.876290 | 2.634449  | -3.019932 |
| H | -4.782522 | 2.061756  | -4.700423 |
| C | -2.211310 | 1.281216  | -4.791338 |
| H | -1.317558 | 0.683825  | -4.582160 |
| H | -1.881010 | 2.242546  | -5.208261 |
| H | -2.788391 | 0.759669  | -5.579938 |
| C | -0.831903 | 4.113974  | -3.640461 |
| H | -0.135426 | 3.341247  | -3.989814 |
| H | -0.302222 | 5.084525  | -3.691487 |
| H | -1.672621 | 4.160589  | -4.349442 |
| C | -0.143367 | 4.154501  | -1.232336 |
| H | 0.674633  | 3.425857  | -1.324151 |
| H | -0.458236 | 4.165512  | -0.183170 |
| H | 0.277708  | 5.152737  | -1.456777 |
| C | -2.435104 | 4.889434  | -1.906621 |
| H | -2.050558 | 5.904876  | -2.120441 |
| H | -2.758266 | 4.881181  | -0.857155 |
| H | -3.323608 | 4.735249  | -2.535616 |
| C | 3.725514  | 5.760065  | 1.986719  |
| H | 4.313026  | 6.130795  | 2.837326  |
| H | 2.667828  | 5.977685  | 2.182090  |
| H | 4.017911  | 6.357406  | 1.102127  |



|   |           |           |           |
|---|-----------|-----------|-----------|
| C | 5.456690  | 4.172035  | 1.202805  |
| H | 6.161379  | 4.564794  | 1.950213  |
| H | 5.574079  | 4.790863  | 0.292246  |
| H | 5.769343  | 3.152022  | 0.946890  |
| C | 3.082713  | 3.883583  | 0.485921  |
| H | 3.377779  | 4.473442  | -0.402481 |
| H | 2.027496  | 4.100349  | 0.673142  |
| H | 3.170051  | 2.825622  | 0.206854  |
| C | 1.280870  | 2.543001  | 4.918530  |
| H | 1.911230  | 2.318676  | 5.793723  |
| H | 1.098384  | 1.593562  | 4.380302  |
| H | 0.304609  | 2.884340  | 5.293632  |
| C | 0.799380  | 3.904678  | 2.918643  |
| H | -0.156030 | 4.080192  | 3.420760  |
| H | 0.641992  | 3.069318  | 2.235890  |
| H | 1.023392  | 4.793561  | 2.322638  |
| C | 1.998735  | 4.908484  | 4.852415  |
| H | 2.616670  | 4.753550  | 5.746643  |
| H | 0.993077  | 5.199677  | 5.202099  |
| H | 2.411893  | 5.757797  | 4.295503  |
| C | 6.272260  | 2.453275  | 4.104304  |
| H | 7.077413  | 2.480038  | 4.864662  |
| H | 6.700117  | 2.810238  | 3.154594  |
| H | 5.984654  | 1.399683  | 3.960421  |
| C | 5.557603  | 4.756077  | 4.780510  |
| H | 6.317832  | 4.767577  | 5.585752  |
| H | 4.745238  | 5.432912  | 5.083320  |
| H | 6.034248  | 5.171432  | 3.880770  |
| C | 4.618876  | 2.763699  | 5.948178  |
| H | 5.500564  | 2.640775  | 6.607281  |
| H | 4.126148  | 1.784995  | 5.874436  |
| H | 3.924291  | 3.448726  | 6.457544  |
| C | 3.653825  | -2.769981 | 6.321016  |
| H | 4.466766  | -3.490906 | 6.152582  |
| H | 2.702251  | -3.255093 | 6.063007  |

|    |           |           |           |
|----|-----------|-----------|-----------|
| H  | 3.623302  | -2.550410 | 7.406491  |
| C  | 2.651971  | -0.531677 | 5.821411  |
| H  | 2.593368  | -0.253231 | 6.895978  |
| H  | 1.680976  | -0.993824 | 5.547856  |
| H  | 2.723912  | 0.399456  | 5.233503  |
| C  | 5.116288  | -0.754714 | 6.136273  |
| H  | 5.984129  | -1.430907 | 6.168643  |
| H  | 4.914930  | -0.428834 | 7.176524  |
| H  | 5.409595  | 0.138115  | 5.565970  |
| C  | 6.308640  | -3.435143 | 4.072227  |
| H  | 7.287732  | -3.815808 | 3.722603  |
| H  | 5.615458  | -4.285418 | 4.088270  |
| H  | 6.447947  | -3.091143 | 5.106976  |
| C  | 6.930075  | -1.181285 | 3.243182  |
| H  | 7.922530  | -1.618289 | 3.016452  |
| H  | 6.990274  | -0.744756 | 4.249929  |
| H  | 6.764765  | -0.365833 | 2.527659  |
| C  | 5.914886  | -2.834930 | 1.684169  |
| H  | 6.966140  | -3.065296 | 1.425174  |
| H  | 5.546295  | -2.115456 | 0.939226  |
| H  | 5.344530  | -3.765968 | 1.564321  |
| C  | 3.131699  | -4.421734 | 3.308064  |
| H  | 4.020795  | -4.752548 | 2.756183  |
| H  | 2.309590  | -5.102871 | 3.027643  |
| H  | 3.320882  | -4.568286 | 4.378336  |
| C  | 2.518626  | -2.910119 | 1.435793  |
| H  | 3.440770  | -3.070281 | 0.869595  |
| H  | 2.109844  | -1.941378 | 1.122802  |
| H  | 1.795889  | -3.681144 | 1.122835  |
| C  | 1.313329  | -2.752730 | 3.581472  |
| H  | 1.293338  | -2.936880 | 4.660134  |
| H  | 0.600630  | -3.439865 | 3.115924  |
| H  | 0.936627  | -1.734729 | 3.416584  |
| Si | 0.171772  | 0.467183  | -1.921697 |
| C  | -0.536472 | -1.335173 | -1.770203 |

|    |           |           |           |
|----|-----------|-----------|-----------|
| H  | 0.222007  | -2.024216 | -1.366324 |
| H  | -0.854450 | -1.740877 | -2.745504 |
| H  | -1.403075 | -1.371290 | -1.094668 |
| Si | 3.679329  | 0.676845  | 2.419781  |
| C  | 5.003549  | 0.715280  | 1.019468  |
| H  | 5.996658  | 1.018278  | 1.395486  |
| H  | 4.717388  | 1.431915  | 0.235809  |
| H  | 5.109660  | -0.268780 | 0.539229  |

-----  
 -----  
 (SiMe(SitBu3)2)-Tl-(Sb-SiMe(SitBu3)2)  
 -----

| Atomic<br>Number | Coordinates (Angstroms) |           |           |
|------------------|-------------------------|-----------|-----------|
|                  | X                       | Y         | Z         |
| Tl               | 0.892187                | -0.117760 | -0.967152 |
| Sb               | -1.343855               | -0.074734 | 0.963312  |
| Si               | -4.310218               | 2.338140  | 0.583730  |
| Si               | -4.449237               | -2.193536 | -0.565977 |
| Si               | 4.462606                | 2.251038  | -0.474190 |
| Si               | 4.315721                | -2.281544 | 0.691882  |
| C                | 4.738399                | -2.975142 | -1.092612 |
| C                | 2.806417                | -3.307305 | 1.472471  |
| C                | 5.854735                | -2.413797 | 1.901729  |
| C                | 4.194087                | 2.372659  | -2.429848 |
| C                | 6.363150                | 2.338013  | -0.005648 |
| C                | 3.463356                | 3.722384  | 0.384585  |
| C                | -4.873453               | 2.067979  | 2.439779  |
| C                | -2.822894               | 3.668489  | 0.542800  |
| C                | -5.795604               | 3.019065  | -0.516951 |
| C                | -4.520182               | -3.058261 | 1.207114  |
| C                | -3.220326               | -3.233193 | -1.730338 |
| C                | -6.230648               | -2.189987 | -1.399995 |
| C                | 3.760856                | 5.078298  | -0.310155 |
| H                | 3.245420                | 5.883348  | 0.246452  |

|   |          |           |           |
|---|----------|-----------|-----------|
| H | 3.390642 | 5.112447  | -1.343136 |
| H | 4.831028 | 5.325467  | -0.324867 |
| C | 1.927661 | 3.521145  | 0.338520  |
| H | 1.590637 | 2.596974  | 0.827452  |
| H | 1.528727 | 3.517606  | -0.682645 |
| H | 1.439167 | 4.360451  | 0.867523  |
| C | 3.864567 | 3.895122  | 1.869612  |
| H | 3.749827 | 2.975077  | 2.455970  |
| H | 3.218011 | 4.665716  | 2.328916  |
| H | 4.902136 | 4.241914  | 1.974395  |
| C | 2.750159 | 2.767322  | -2.819916 |
| H | 1.995395 | 2.085002  | -2.396111 |
| H | 2.647076 | 2.716875  | -3.919406 |
| H | 2.483406 | 3.787062  | -2.516163 |
| C | 5.134158 | 3.425517  | -3.072640 |
| H | 5.014334 | 4.427940  | -2.639950 |
| H | 4.906452 | 3.502058  | -4.152339 |
| H | 6.191875 | 3.142418  | -2.985481 |
| C | 4.468786 | 1.026655  | -3.131883 |
| H | 3.796939 | 0.234053  | -2.767748 |
| H | 5.503029 | 0.685631  | -3.001506 |
| H | 4.293691 | 1.135939  | -4.218721 |
| C | 7.003047 | 3.741676  | -0.113384 |
| H | 6.573239 | 4.448897  | 0.610236  |
| H | 6.909831 | 4.179336  | -1.116539 |
| H | 8.083034 | 3.663519  | 0.113760  |
| C | 6.547535 | 1.856311  | 1.452207  |
| H | 6.098998 | 2.539562  | 2.184442  |
| H | 7.624994 | 1.774351  | 1.686120  |
| H | 6.100768 | 0.865655  | 1.605969  |
| C | 7.169010 | 1.376722  | -0.908941 |
| H | 6.743654 | 0.365330  | -0.920186 |
| H | 8.204841 | 1.295123  | -0.530820 |
| H | 7.227437 | 1.727634  | -1.948987 |
| C | 7.139649 | -1.912480 | 1.207286  |

|   |          |           |           |
|---|----------|-----------|-----------|
| H | 7.959008 | -1.853389 | 1.947422  |
| H | 7.015065 | -0.913173 | 0.773065  |
| H | 7.466930 | -2.594700 | 0.410325  |
| C | 6.119829 | -3.868031 | 2.364575  |
| H | 5.313398 | -4.261765 | 2.997181  |
| H | 7.046224 | -3.887589 | 2.968660  |
| H | 6.260310 | -4.560719 | 1.523244  |
| C | 5.647605 | -1.546188 | 3.166143  |
| H | 5.562166 | -0.479480 | 2.922545  |
| H | 6.522516 | -1.661537 | 3.832679  |
| H | 4.755829 | -1.828896 | 3.738211  |
| C | 5.449164 | -4.350360 | -1.096993 |
| H | 4.858153 | -5.144252 | -0.623273 |
| H | 6.427090 | -4.307344 | -0.595651 |
| H | 5.634234 | -4.654382 | -2.144284 |
| C | 5.665263 | -1.983715 | -1.825046 |
| H | 6.683378 | -1.981660 | -1.416528 |
| H | 5.276421 | -0.962840 | -1.768757 |
| H | 5.736442 | -2.253574 | -2.895157 |
| C | 3.453994 | -3.097389 | -1.946902 |
| H | 2.749031 | -3.844698 | -1.557596 |
| H | 3.723772 | -3.402865 | -2.974663 |
| H | 2.922784 | -2.134500 | -2.023734 |
| C | 2.956206 | -4.824013 | 1.183176  |
| H | 2.147215 | -5.365614 | 1.708152  |
| H | 3.910568 | -5.238381 | 1.535848  |
| H | 2.856486 | -5.056696 | 0.114232  |
| C | 1.446113 | -2.872735 | 0.894637  |
| H | 0.643458 | -3.529014 | 1.277198  |
| H | 1.401163 | -2.925707 | -0.202370 |
| H | 1.178606 | -1.854312 | 1.215871  |
| C | 2.677572 | -3.158049 | 3.009246  |
| H | 1.768516 | -3.693413 | 3.340361  |
| H | 2.572304 | -2.112707 | 3.329284  |
| H | 3.525381 | -3.597816 | 3.550476  |

|   |           |           |           |
|---|-----------|-----------|-----------|
| C | -5.104999 | -2.088759 | 2.254133  |
| H | -6.148474 | -1.819350 | 2.047713  |
| H | -4.519983 | -1.165521 | 2.316951  |
| H | -5.077992 | -2.563221 | 3.253122  |
| C | -3.114750 | -3.454038 | 1.721364  |
| H | -2.434511 | -2.590371 | 1.764027  |
| H | -2.637877 | -4.233749 | 1.111703  |
| H | -3.211102 | -3.856692 | 2.747799  |
| C | -5.398791 | -4.333049 | 1.236132  |
| H | -6.459662 | -4.113867 | 1.048820  |
| H | -5.334683 | -4.780676 | 2.246152  |
| H | -5.074400 | -5.099477 | 0.520153  |
| C | -1.737828 | -2.929303 | -1.431963 |
| H | -1.471977 | -1.916825 | -1.762708 |
| H | -1.092571 | -3.637026 | -1.988822 |
| H | -1.476907 | -2.998549 | -0.368875 |
| C | -3.419282 | -4.760819 | -1.549842 |
| H | -4.455776 | -5.081302 | -1.721713 |
| H | -3.114112 | -5.110216 | -0.554984 |
| H | -2.783855 | -5.288261 | -2.286858 |
| C | -3.424944 | -2.941420 | -3.237227 |
| H | -4.377697 | -3.337543 | -3.613874 |
| H | -2.620510 | -3.440944 | -3.810120 |
| H | -3.382576 | -1.869989 | -3.472519 |
| C | -6.263721 | -1.282000 | -2.654403 |
| H | -7.308825 | -1.171136 | -2.998877 |
| H | -5.687030 | -1.700539 | -3.488029 |
| H | -5.876889 | -0.274180 | -2.461966 |
| C | -7.272299 | -1.643074 | -0.395117 |
| H | -8.235969 | -1.476929 | -0.911944 |
| H | -6.967042 | -0.685665 | 0.045134  |
| H | -7.460119 | -2.349710 | 0.425582  |
| C | -6.722616 | -3.587466 | -1.854665 |
| H | -7.752609 | -3.493797 | -2.248844 |
| H | -6.750852 | -4.318870 | -1.036598 |

|   |           |           |           |
|---|-----------|-----------|-----------|
| H | -6.105991 | -4.005133 | -2.662656 |
| C | -6.825401 | 1.911361  | -0.816050 |
| H | -7.590585 | 2.298901  | -1.514712 |
| H | -7.349641 | 1.564295  | 0.082456  |
| H | -6.360248 | 1.041654  | -1.290924 |
| C | -6.582220 | 4.181457  | 0.137171  |
| H | -7.348004 | 4.541455  | -0.576244 |
| H | -5.956668 | 5.041105  | 0.406928  |
| H | -7.115809 | 3.851124  | 1.040249  |
| C | -5.264834 | 3.498095  | -1.889971 |
| H | -6.118129 | 3.798548  | -2.526499 |
| H | -4.722331 | 2.702180  | -2.419439 |
| H | -4.598001 | 4.365774  | -1.808571 |
| C | -6.198551 | 1.272243  | 2.456381  |
| H | -6.421009 | 0.932671  | 3.484712  |
| H | -6.156153 | 0.382219  | 1.817249  |
| H | -7.044431 | 1.891381  | 2.124734  |
| C | -5.120972 | 3.386799  | 3.215503  |
| H | -5.487150 | 3.141903  | 4.230577  |
| H | -5.876616 | 4.026306  | 2.739671  |
| H | -4.203960 | 3.978861  | 3.338099  |
| C | -3.817903 | 1.274541  | 3.247634  |
| H | -4.242150 | 0.981214  | 4.225886  |
| H | -2.914598 | 1.866005  | 3.442208  |
| H | -3.497515 | 0.345478  | 2.750357  |
| C | -1.959895 | 3.562610  | -0.736500 |
| H | -2.545634 | 3.663348  | -1.660767 |
| H | -1.416417 | 2.606473  | -0.759522 |
| H | -1.206303 | 4.372387  | -0.730867 |
| C | -3.367973 | 5.118821  | 0.618996  |
| H | -3.995039 | 5.288461  | 1.505620  |
| H | -3.940907 | 5.411712  | -0.270475 |
| H | -2.507363 | 5.810431  | 0.690355  |
| C | -1.847192 | 3.531163  | 1.734751  |
| H | -2.321361 | 3.757530  | 2.698722  |

|    |           |           |           |
|----|-----------|-----------|-----------|
| H  | -1.019849 | 4.252115  | 1.599584  |
| H  | -1.391853 | 2.529801  | 1.786430  |
| Si | 3.582774  | 0.107999  | 0.432489  |
| C  | 2.857451  | 0.505197  | 2.180780  |
| H  | 2.244957  | -0.329848 | 2.549794  |
| H  | 2.214228  | 1.394307  | 2.180030  |
| H  | 3.660407  | 0.674452  | 2.917962  |
| Si | -3.529076 | 0.148204  | -0.382767 |
| C  | -3.058995 | 0.569097  | -2.208908 |
| H  | -3.940238 | 0.584345  | -2.869810 |
| H  | -2.364542 | -0.188281 | -2.604346 |
| H  | -2.559562 | 1.543677  | -2.283531 |

-----  
 -----  
 Tl-Sb(SiMe(SitBu3)2)2  
 -----

| Atomic<br>Number | Coordinates (Angstroms) |           |           |
|------------------|-------------------------|-----------|-----------|
|                  | X                       | Y         | Z         |
| Sb               | -0.103897               | 0.395162  | 1.717147  |
| Tl               | 1.264012                | 1.743872  | 4.135349  |
| Si               | 0.005735                | -3.986238 | 1.683960  |
| Si               | -2.836051               | -1.760618 | 4.685248  |
| Si               | -2.366531               | 3.346087  | -1.030834 |
| Si               | 2.287199                | 2.586393  | -1.106135 |
| C                | -4.300535               | -3.119820 | 4.775577  |
| C                | -3.682108               | 0.042846  | 4.775028  |
| C                | -1.640482               | -1.968587 | 6.258012  |
| C                | -5.029106               | -3.283395 | 3.419595  |
| H                | -4.377872               | -3.712577 | 2.649240  |
| H                | -5.432162               | -2.340088 | 3.029623  |
| H                | -5.882026               | -3.976777 | 3.549094  |
| C                | -5.378108               | -2.746451 | 5.825768  |
| H                | -4.959723               | -2.597442 | 6.829884  |
| H                | -6.105751               | -3.577974 | 5.894127  |



|   |           |           |           |
|---|-----------|-----------|-----------|
| H | -5.945560 | -1.847802 | 5.553782  |
| C | -3.777696 | -4.518374 | 5.176709  |
| H | -3.462024 | -4.559813 | 6.229279  |
| H | -2.942667 | -4.853954 | 4.554603  |
| H | -4.591722 | -5.258652 | 5.056945  |
| C | -2.386095 | -2.061446 | 7.613533  |
| H | -3.017800 | -2.959347 | 7.666941  |
| H | -3.013211 | -1.190413 | 7.835811  |
| C | -0.648838 | -0.784351 | 6.334512  |
| H | 0.095298  | -0.972650 | 7.131875  |
| H | -1.145235 | 0.167239  | 6.567387  |
| H | -0.095612 | -0.670435 | 5.385846  |
| C | -4.169378 | 0.427152  | 6.195578  |
| H | -4.836355 | -0.312525 | 6.655584  |
| H | -4.729638 | 1.379579  | 6.128191  |
| H | -3.327409 | 0.606821  | 6.879755  |
| C | -4.895478 | 0.145674  | 3.822085  |
| H | -4.631268 | -0.113399 | 2.788907  |
| H | -5.263537 | 1.188643  | 3.811877  |
| H | -5.737579 | -0.486374 | 4.132867  |
| C | -2.699125 | 1.145212  | 4.344408  |
| H | -1.778994 | 1.150143  | 4.945157  |
| H | -3.172618 | 2.137434  | 4.464593  |
| H | -2.394232 | 1.042131  | 3.298174  |
| C | 0.006125  | -4.121993 | -0.300731 |
| C | 1.844340  | -3.641533 | 2.337920  |
| C | -0.681450 | -5.717222 | 2.370031  |
| C | -0.017373 | -6.945100 | 1.696513  |
| H | -0.243684 | -7.018157 | 0.625466  |
| H | -0.407331 | -7.865382 | 2.173232  |
| H | 1.074252  | -6.956724 | 1.818121  |
| C | -0.431549 | -5.865879 | 3.883442  |
| H | -0.906941 | -5.067696 | 4.456570  |
| H | 0.638306  | -5.875492 | 4.134757  |
| H | -0.859880 | -6.823639 | 4.236126  |

|   |           |           |           |
|---|-----------|-----------|-----------|
| C | 1.846365  | -3.138244 | 3.797898  |
| H | 2.878257  | -2.859789 | 4.086962  |
| H | 1.511209  | -3.904166 | 4.509342  |
| H | 1.218748  | -2.242516 | 3.924835  |
| C | -2.208454 | -5.831677 | 2.137622  |
| H | -2.609738 | -6.692182 | 2.705711  |
| H | -2.459663 | -5.994670 | 1.082607  |
| H | -2.749124 | -4.938215 | 2.474410  |
| C | 2.758525  | -4.890877 | 2.289479  |
| H | 2.836112  | -5.320441 | 1.282072  |
| H | 2.428085  | -5.682854 | 2.977078  |
| H | 3.780332  | -4.598438 | 2.599453  |
| C | 2.527423  | -2.537167 | 1.504568  |
| H | 2.703849  | -2.836383 | 0.464652  |
| H | 3.515260  | -2.305205 | 1.947168  |
| H | 1.947358  | -1.603273 | 1.501494  |
| C | 1.214899  | -4.934186 | -0.833928 |
| H | 1.110718  | -5.049807 | -1.930140 |
| H | 1.281240  | -5.943989 | -0.407606 |
| H | 2.172289  | -4.425756 | -0.657053 |
| C | -1.270938 | -4.789441 | -0.867789 |
| H | -1.267956 | -4.684047 | -1.969422 |
| H | -2.192665 | -4.319630 | -0.499179 |
| H | -1.320966 | -5.865203 | -0.653162 |
| C | 0.074110  | -2.723973 | -0.939272 |
| H | 0.204794  | -2.818076 | -2.034670 |
| H | 0.902265  | -2.122866 | -0.556149 |
| H | -0.850698 | -2.161710 | -0.769119 |
| C | -0.786100 | -3.244074 | 6.151736  |
| H | -0.279167 | -3.307379 | 5.186980  |
| H | -1.379995 | -4.154480 | 6.294514  |
| H | -1.640604 | -2.146875 | 8.427807  |
| H | -0.006994 | -3.240613 | 6.937958  |
| C | 2.842817  | 4.155853  | -0.032263 |
| C | 3.494858  | 1.070126  | -0.687240 |

|   |           |          |           |
|---|-----------|----------|-----------|
| C | 2.439617  | 3.001392 | -3.040768 |
| C | -3.763875 | 2.700794 | 0.198864  |
| C | -3.038896 | 3.117684 | -2.906404 |
| C | -2.023989 | 5.256561 | -0.647456 |
| C | -4.120316 | 4.174858 | -3.249723 |
| H | -3.706880 | 5.192623 | -3.284778 |
| H | -4.968963 | 4.171735 | -2.555561 |
| H | -4.521876 | 3.956627 | -4.258377 |
| C | -3.679078 | 1.723447 | -3.120271 |
| H | -3.972103 | 1.621729 | -4.182859 |
| H | -4.588216 | 1.580749 | -2.522030 |
| H | -2.987450 | 0.901037 | -2.895748 |
| C | -1.948765 | 3.268834 | -3.989257 |
| H | -1.154673 | 2.517309 | -3.901767 |
| H | -1.483336 | 4.261930 | -3.981740 |
| H | -2.410893 | 3.134458 | -4.986126 |
| C | -5.193407 | 3.171736 | -0.169975 |
| H | -5.273892 | 4.261679 | -0.277228 |
| H | -5.884975 | 2.871171 | 0.640542  |
| H | -5.566715 | 2.707527 | -1.093361 |
| C | -3.778100 | 1.158401 | 0.247504  |
| H | -2.881670 | 0.773381 | 0.752323  |
| H | -3.843550 | 0.687524 | -0.740881 |
| H | -4.655687 | 0.819261 | 0.826721  |
| C | -3.486500 | 3.188903 | 1.638697  |
| H | -2.466182 | 2.946546 | 1.969099  |
| H | -4.185710 | 2.689477 | 2.330323  |
| H | -3.647248 | 4.269716 | 1.752100  |
| C | -1.177759 | 5.401379 | 0.640898  |
| H | -0.289915 | 4.758063 | 0.629306  |
| H | -1.750372 | 5.155608 | 1.544053  |
| H | -0.829630 | 6.446726 | 0.745685  |
| C | -1.248430 | 5.925835 | -1.805349 |
| H | -0.341204 | 5.379623 | -2.079536 |
| H | -0.943382 | 6.946476 | -1.505232 |

|   |           |           |           |
|---|-----------|-----------|-----------|
| H | -1.864703 | 6.026922  | -2.710344 |
| C | -3.310297 | 6.096975  | -0.445536 |
| H | -3.026178 | 7.157340  | -0.301188 |
| H | -3.879500 | 5.793816  | 0.442840  |
| H | -3.983325 | 6.056780  | -1.312516 |
| C | 2.259037  | 5.474030  | -0.589973 |
| H | 2.489321  | 6.303051  | 0.105998  |
| H | 1.172890  | 5.442983  | -0.710895 |
| H | 2.704725  | 5.737900  | -1.559034 |
| C | 2.369063  | 4.017236  | 1.435749  |
| H | 2.581581  | 4.952792  | 1.987515  |
| H | 2.903112  | 3.205944  | 1.952404  |
| H | 1.287698  | 3.824955  | 1.510550  |
| C | 4.381844  | 4.347867  | -0.005147 |
| H | 4.620384  | 5.277489  | 0.546889  |
| H | 4.808407  | 4.454816  | -1.012229 |
| H | 4.907741  | 3.527328  | 0.500116  |
| C | 3.785373  | 3.651290  | -3.446399 |
| H | 3.783421  | 3.816645  | -4.541433 |
| H | 4.657925  | 3.029225  | -3.213789 |
| H | 3.928920  | 4.634960  | -2.976824 |
| C | 2.265556  | 1.723673  | -3.897175 |
| H | 2.240927  | 2.005480  | -4.966976 |
| H | 1.330896  | 1.190384  | -3.679186 |
| H | 3.097488  | 1.018184  | -3.769544 |
| C | 1.330567  | 3.983216  | -3.463206 |
| H | 1.535732  | 5.009222  | -3.133083 |
| H | 0.357372  | 3.686387  | -3.064679 |
| H | 1.242276  | 4.008907  | -4.565554 |
| C | 4.876600  | 1.189870  | -1.378679 |
| H | 5.387750  | 2.139560  | -1.172326 |
| H | 4.808654  | 1.065491  | -2.468514 |
| H | 5.530097  | 0.378444  | -1.005173 |
| C | 2.871143  | -0.265539 | -1.141396 |
| H | 3.584493  | -1.087948 | -0.949640 |

|    |           |           |           |
|----|-----------|-----------|-----------|
| H  | 2.626439  | -0.288488 | -2.210820 |
| H  | 1.961493  | -0.476117 | -0.567421 |
| C  | 3.750960  | 0.929763  | 0.830919  |
| H  | 4.316050  | 1.773874  | 1.249594  |
| H  | 4.347835  | 0.017501  | 1.015189  |
| H  | 2.806986  | 0.812298  | 1.384610  |
| Si | -1.489867 | -1.950703 | 2.321999  |
| C  | -2.939203 | -2.058088 | 1.063023  |
| H  | -2.626665 | -1.694717 | 0.074030  |
| H  | -3.797180 | -1.451034 | 1.378497  |
| H  | -3.285402 | -3.094663 | 0.944171  |
| Si | -0.224845 | 1.825780  | -0.618914 |
| C  | -0.542176 | 0.460908  | -1.921827 |
| H  | 0.281923  | -0.259722 | -1.960401 |
| H  | -0.683945 | 0.872839  | -2.930075 |
| H  | -1.457025 | -0.090205 | -1.656990 |

-----  
 -----  
 (SiiPrDis2)2Tl-Sb  
 -----

| Atomic<br>Number | Coordinates (Angstroms) |           |          |
|------------------|-------------------------|-----------|----------|
|                  | X                       | Y         | Z        |
| Tl               | -0.137100               | -0.568744 | 1.492383 |
| Si               | 2.454770                | 0.174341  | 0.578372 |
| Si               | -2.739075               | -0.062636 | 0.485613 |
| C                | 3.283338                | 0.024967  | 2.335020 |
| H                | 2.873643                | -0.993125 | 2.580230 |
| C                | 4.812394                | -0.132741 | 2.430730 |
| H                | 5.177473                | -0.926883 | 1.758476 |
| H                | 5.101457                | -0.419470 | 3.465497 |
| H                | 5.354802                | 0.797669  | 2.187232 |
| C                | 2.754956                | 0.949929  | 3.450336 |
| H                | 3.228285                | 1.942491  | 3.411585 |
| H                | 2.981299                | 0.513253  | 4.437943 |

|    |           |           |           |
|----|-----------|-----------|-----------|
| H  | 1.667859  | 1.092262  | 3.403266  |
| C  | -3.993091 | -0.168124 | 1.989798  |
| H  | -4.224156 | 0.907235  | 2.125473  |
| C  | -5.326363 | -0.872490 | 1.670565  |
| H  | -5.210108 | -1.967586 | 1.685799  |
| H  | -5.733154 | -0.591329 | 0.684095  |
| H  | -6.092027 | -0.617812 | 2.429915  |
| C  | -3.443481 | -0.646258 | 3.345541  |
| H  | -2.564322 | -0.066559 | 3.674940  |
| H  | -3.122543 | -1.705365 | 3.331842  |
| H  | -4.215046 | -0.549675 | 4.137047  |
| C  | -3.045867 | 1.741957  | -0.160049 |
| H  | -2.351416 | 1.878070  | -1.009570 |
| Si | -2.485183 | 3.116806  | 1.060530  |
| Si | -4.763974 | 2.130023  | -0.905452 |
| C  | -1.494270 | 4.411529  | 0.108198  |
| H  | -0.514201 | 4.019580  | -0.203983 |
| H  | -1.308781 | 5.294263  | 0.745312  |
| H  | -2.017336 | 4.756714  | -0.798838 |
| C  | -3.871637 | 4.040068  | 1.954783  |
| H  | -4.511876 | 3.381767  | 2.563679  |
| H  | -4.522280 | 4.615425  | 1.277471  |
| H  | -3.395352 | 4.761224  | 2.642638  |
| C  | -1.370990 | 2.518308  | 2.469333  |
| H  | -1.873308 | 1.801438  | 3.132000  |
| H  | -1.090926 | 3.391325  | 3.079455  |
| H  | -0.425987 | 2.079816  | 2.116134  |
| C  | -4.604472 | 3.744625  | -1.885259 |
| H  | -3.782972 | 3.688867  | -2.622253 |
| H  | -4.407514 | 4.612739  | -1.233007 |
| H  | -5.537806 | 3.951156  | -2.440199 |
| C  | -6.149379 | 2.336381  | 0.377541  |
| H  | -7.080549 | 1.890337  | -0.014290 |
| H  | -6.353287 | 3.398768  | 0.586682  |
| H  | -5.934885 | 1.847759  | 1.339412  |

|    |           |           |           |
|----|-----------|-----------|-----------|
| C  | -5.451113 | 0.853754  | -2.125940 |
| H  | -5.741698 | -0.091959 | -1.637295 |
| H  | -4.780252 | 0.613108  | -2.963289 |
| H  | -6.373204 | 1.286700  | -2.557772 |
| C  | -3.077201 | -1.419100 | -0.875164 |
| H  | -4.129816 | -1.205666 | -1.153886 |
| Si | -3.247160 | -3.258524 | -0.333163 |
| Si | -2.243076 | -1.247278 | -2.588548 |
| C  | -2.775314 | -3.646886 | 1.452765  |
| H  | -2.667249 | -4.736059 | 1.542911  |
| H  | -3.537956 | -3.327637 | 2.176517  |
| H  | -1.823694 | -3.201038 | 1.758400  |
| C  | -5.049943 | -3.738956 | -0.639123 |
| H  | -5.242669 | -4.772048 | -0.303862 |
| H  | -5.273723 | -3.692180 | -1.718893 |
| H  | -5.762557 | -3.076869 | -0.123561 |
| C  | -2.260593 | -4.533232 | -1.327355 |
| H  | -1.174653 | -4.448793 | -1.209387 |
| H  | -2.493706 | -4.528090 | -2.401788 |
| H  | -2.554781 | -5.520127 | -0.934435 |
| C  | -3.434276 | -1.974478 | -3.870568 |
| H  | -3.574739 | -3.060034 | -3.742203 |
| H  | -3.044187 | -1.810608 | -4.891228 |
| H  | -4.430566 | -1.503540 | -3.815914 |
| C  | -0.589164 | -2.146406 | -2.806412 |
| H  | -0.720285 | -3.221966 | -2.979717 |
| H  | 0.099527  | -2.025018 | -1.957435 |
| H  | -0.080033 | -1.731327 | -3.692407 |
| C  | -1.887436 | 0.530196  | -3.132159 |
| H  | -1.148477 | 1.020319  | -2.479146 |
| H  | -2.779888 | 1.172027  | -3.177484 |
| H  | -1.446652 | 0.501390  | -4.145307 |
| Sb | 0.230219  | -2.090497 | 4.176670  |
| C  | 2.224804  | 1.970708  | -0.231223 |
| H  | 1.134247  | 2.104262  | -0.040950 |

|    |           |           |           |
|----|-----------|-----------|-----------|
| C  | 3.230018  | -1.226774 | -0.507458 |
| H  | 2.609275  | -1.201506 | -1.423673 |
| Si | 2.170158  | 2.130925  | -2.144423 |
| Si | 2.893505  | 3.557511  | 0.621257  |
| C  | 3.777952  | 2.728603  | -2.950911 |
| H  | 4.373225  | 3.407254  | -2.318835 |
| H  | 3.529342  | 3.276391  | -3.878523 |
| H  | 4.429315  | 1.885159  | -3.231850 |
| C  | 1.673864  | 0.529522  | -3.013806 |
| H  | 0.916144  | -0.022810 | -2.439919 |
| H  | 2.516228  | -0.150852 | -3.202533 |
| H  | 1.220446  | 0.771218  | -3.991847 |
| C  | 0.789351  | 3.334319  | -2.633730 |
| H  | 0.648958  | 3.279933  | -3.729345 |
| H  | 0.994506  | 4.384231  | -2.377647 |
| H  | -0.175070 | 3.058999  | -2.174128 |
| C  | 4.717007  | 3.483630  | 1.092224  |
| H  | 4.981736  | 4.423173  | 1.610871  |
| H  | 5.374837  | 3.394320  | 0.211283  |
| H  | 4.954032  | 2.650363  | 1.771568  |
| C  | 1.868797  | 4.023569  | 2.148961  |
| H  | 0.945711  | 4.538400  | 1.836622  |
| H  | 2.448332  | 4.736773  | 2.762210  |
| H  | 1.582048  | 3.190196  | 2.796967  |
| C  | 2.706625  | 5.122796  | -0.439035 |
| H  | 3.216570  | 5.097307  | -1.414471 |
| H  | 3.143122  | 5.958611  | 0.139612  |
| H  | 1.646986  | 5.372968  | -0.611080 |
| Si | 5.011970  | -0.993909 | -1.195750 |
| Si | 2.929445  | -3.038042 | 0.041751  |
| C  | 3.894271  | -3.589209 | 1.565062  |
| H  | 4.985032  | -3.455919 | 1.492992  |
| H  | 3.698137  | -4.662447 | 1.734021  |
| H  | 3.539854  | -3.054384 | 2.470626  |
| C  | 1.135392  | -3.464810 | 0.482153  |



|   |          |           |           |
|---|----------|-----------|-----------|
| H | 1.008270 | -4.545592 | 0.361364  |
| H | 0.370707 | -2.988340 | -0.140845 |
| H | 0.938764 | -3.239316 | 1.531442  |
| C | 3.343172 | -4.160009 | -1.426847 |
| H | 4.392034 | -4.104428 | -1.754233 |
| H | 2.707560 | -3.911044 | -2.293017 |
| H | 3.134010 | -5.207100 | -1.154267 |
| C | 6.320371 | -2.180935 | -0.506180 |
| H | 6.516233 | -2.023323 | 0.568435  |
| H | 7.267100 | -1.968488 | -1.038646 |
| H | 6.092292 | -3.247625 | -0.656007 |
| C | 5.726370 | 0.724415  | -0.883317 |
| H | 6.176075 | 0.802642  | 0.120455  |
| H | 4.972542 | 1.517189  | -0.973553 |
| H | 6.522056 | 0.937335  | -1.621478 |
| C | 4.974124 | -1.281296 | -3.070363 |
| H | 4.579901 | -0.407906 | -3.617428 |
| H | 4.359682 | -2.153771 | -3.348308 |
| H | 5.999321 | -1.461286 | -3.442427 |

-----  
 -----  
 (SiiPrDis2)-Tl-Sb-(SiiPrDis2)  
 -----

| Atomic<br>Number | Coordinates (Angstroms) |           |           |
|------------------|-------------------------|-----------|-----------|
|                  | X                       | Y         | Z         |
| Tl               | 0.680411                | 0.029575  | 0.640271  |
| Si               | 3.298112                | 0.192338  | -0.347537 |
| C                | 4.323618                | -1.417997 | -0.349811 |
| H                | 4.696000                | -1.438795 | 0.692535  |
| Si               | 5.964718                | -1.299636 | -1.321393 |
| Si               | 3.501400                | -3.145630 | -0.478563 |
| C                | 2.949790                | 0.722847  | -2.185355 |
| C                | 4.155790                | 1.424977  | 0.838835  |
| H                | 5.239136                | 1.259999  | 0.693959  |

|    |          |           |           |
|----|----------|-----------|-----------|
| Si | 3.908761 | 0.995473  | 2.685703  |
| Si | 3.955912 | 3.277579  | 0.478746  |
| C  | 2.464741 | 1.928110  | 3.483649  |
| H  | 2.670875 | 3.006154  | 3.570729  |
| H  | 2.302794 | 1.539335  | 4.503913  |
| H  | 1.507804 | 1.826982  | 2.943447  |
| C  | 5.488654 | 1.434112  | 3.621411  |
| H  | 5.470882 | 0.993704  | 4.632899  |
| H  | 5.630172 | 2.519168  | 3.727967  |
| H  | 6.372158 | 1.029623  | 3.098604  |
| C  | 3.627193 | -0.840777 | 3.067773  |
| H  | 3.420678 | -0.933718 | 4.148628  |
| H  | 4.526999 | -1.440987 | 2.858518  |
| H  | 2.786050 | -1.308916 | 2.533948  |
| C  | 4.886981 | 4.334247  | 1.740180  |
| H  | 4.439991 | 4.309803  | 2.746035  |
| H  | 4.881175 | 5.384766  | 1.400540  |
| H  | 5.940196 | 4.020055  | 1.825132  |
| C  | 4.782453 | 3.704299  | -1.167209 |
| H  | 5.877991 | 3.631539  | -1.059256 |
| H  | 4.548401 | 4.746336  | -1.445267 |
| H  | 4.486313 | 3.060815  | -2.006006 |
| C  | 2.156452 | 3.852066  | 0.520136  |
| H  | 1.458344 | 3.191075  | -0.011420 |
| H  | 2.073695 | 4.849284  | 0.054064  |
| H  | 1.796089 | 3.948762  | 1.555512  |
| C  | 6.915332 | 0.285040  | -0.925675 |
| H  | 7.884156 | 0.253297  | -1.453904 |
| H  | 7.132493 | 0.387326  | 0.150436  |
| H  | 6.388283 | 1.191679  | -1.258738 |
| C  | 7.096737 | -2.716199 | -0.785988 |
| H  | 8.103186 | -2.564009 | -1.212418 |
| H  | 6.738415 | -3.702015 | -1.119816 |
| H  | 7.200706 | -2.749312 | 0.311471  |
| C  | 5.806386 | -1.341833 | -3.200171 |

|    |           |           |           |
|----|-----------|-----------|-----------|
| H  | 6.823585  | -1.384128 | -3.627546 |
| H  | 5.322238  | -0.436998 | -3.598016 |
| H  | 5.254046  | -2.213211 | -3.577784 |
| C  | 4.254178  | -4.228591 | 0.875561  |
| H  | 5.339667  | -4.365018 | 0.759633  |
| H  | 3.785199  | -5.227561 | 0.858925  |
| H  | 4.070820  | -3.794250 | 1.872575  |
| C  | 1.642930  | -3.199942 | -0.172606 |
| H  | 1.313532  | -4.250721 | -0.257947 |
| H  | 1.043965  | -2.620168 | -0.892454 |
| H  | 1.365034  | -2.872314 | 0.843691  |
| C  | 3.755696  | -4.031750 | -2.127860 |
| H  | 4.815831  | -4.195126 | -2.374344 |
| H  | 3.283507  | -3.507219 | -2.972740 |
| H  | 3.276926  | -5.023915 | -2.056065 |
| H  | 3.953635  | 1.000985  | -2.562088 |
| C  | 2.454179  | -0.474742 | -3.024878 |
| H  | 3.113466  | -1.347625 | -2.957531 |
| H  | 2.390084  | -0.183789 | -4.088499 |
| H  | 1.441809  | -0.785521 | -2.720233 |
| C  | 2.001596  | 1.912976  | -2.441825 |
| H  | 2.334250  | 2.848187  | -1.979193 |
| H  | 0.980912  | 1.696468  | -2.085403 |
| H  | 1.919951  | 2.092234  | -3.528571 |
| Sb | -1.204122 | -0.300556 | -1.376461 |
| Si | -3.658446 | -0.313180 | -0.729468 |
| C  | -4.386812 | -1.090570 | -2.355108 |
| H  | -4.077163 | -2.143866 | -2.219175 |
| C  | -3.753505 | -0.661531 | -3.693368 |
| H  | -3.908027 | 0.396717  | -3.937875 |
| H  | -4.167614 | -1.259045 | -4.525667 |
| H  | -2.661907 | -0.836273 | -3.688703 |
| C  | -5.931691 | -1.080334 | -2.393841 |
| H  | -6.357834 | -1.764821 | -1.641628 |
| H  | -6.302577 | -1.409640 | -3.382146 |

|    |           |           |           |
|----|-----------|-----------|-----------|
| H  | -6.352789 | -0.083464 | -2.202077 |
| C  | -4.243276 | -1.685859 | 0.525242  |
| H  | -4.899347 | -2.249850 | -0.169332 |
| C  | -4.160239 | 1.515830  | -0.376906 |
| H  | -5.212579 | 1.507817  | -0.036116 |
| Si | -3.003700 | -3.091001 | 0.920835  |
| Si | -5.508983 | -1.400310 | 1.917131  |
| Si | -3.212677 | 2.363903  | 1.060121  |
| Si | -4.216476 | 2.707125  | -1.878504 |
| C  | -1.717198 | -2.643285 | 2.235270  |
| H  | -2.157809 | -2.668068 | 3.244519  |
| H  | -1.283043 | -1.644277 | 2.082969  |
| H  | -0.890447 | -3.373389 | 2.209803  |
| C  | -2.167526 | -3.801363 | -0.615948 |
| H  | -1.510980 | -3.082449 | -1.123494 |
| H  | -2.920453 | -4.148666 | -1.344485 |
| H  | -1.561401 | -4.675958 | -0.319785 |
| C  | -3.914635 | -4.608648 | 1.603809  |
| H  | -4.356471 | -4.460160 | 2.600352  |
| H  | -3.189608 | -5.438526 | 1.680554  |
| H  | -4.711870 | -4.937893 | 0.916683  |
| C  | -6.853577 | -2.724736 | 1.741085  |
| H  | -7.276049 | -2.728318 | 0.721305  |
| H  | -7.681898 | -2.518974 | 2.441327  |
| H  | -6.481084 | -3.737551 | 1.952240  |
| C  | -4.809890 | -1.554729 | 3.668933  |
| H  | -4.627308 | -2.608787 | 3.932950  |
| H  | -5.541861 | -1.156775 | 4.393070  |
| H  | -3.867971 | -1.008301 | 3.813281  |
| C  | -6.468858 | 0.224154  | 1.817079  |
| H  | -6.895272 | 0.381223  | 0.812612  |
| H  | -5.880932 | 1.112551  | 2.085395  |
| H  | -7.314425 | 0.161269  | 2.524539  |
| C  | -4.301539 | 3.676437  | 1.894316  |
| H  | -5.368279 | 3.399912  | 1.892559  |

|   |           |          |           |
|---|-----------|----------|-----------|
| H | -4.212958 | 4.657810 | 1.406311  |
| H | -3.991631 | 3.799519 | 2.946723  |
| C | -2.745306 | 1.191537 | 2.469050  |
| H | -2.333615 | 0.229169 | 2.137523  |
| H | -3.617369 | 0.985659 | 3.106595  |
| H | -1.990482 | 1.687129 | 3.106504  |
| C | -1.622582 | 3.236131 | 0.517088  |
| H | -1.057257 | 2.631733 | -0.206749 |
| H | -0.978104 | 3.403366 | 1.397997  |
| H | -1.813797 | 4.220707 | 0.062534  |
| C | -4.540493 | 4.497008 | -1.341696 |
| H | -3.691551 | 4.964229 | -0.821372 |
| H | -5.430054 | 4.588269 | -0.698661 |
| H | -4.729068 | 5.087813 | -2.255561 |
| C | -2.642423 | 2.776913 | -2.915549 |
| H | -2.254219 | 1.788960 | -3.198322 |
| H | -1.832483 | 3.286477 | -2.371447 |
| H | -2.843737 | 3.349120 | -3.838914 |
| C | -5.703020 | 2.358015 | -2.995161 |
| H | -5.616664 | 1.451129 | -3.605217 |
| H | -5.827145 | 3.212093 | -3.683397 |
| H | -6.628867 | 2.278741 | -2.400291 |

-----  
-----  
Tl-Sb(SiiPrDis2)2  
-----

| Atomic<br>Number | Coordinates (Angstroms) |           |           |
|------------------|-------------------------|-----------|-----------|
|                  | X                       | Y         | Z         |
| Sb               | 0.835025                | 0.314887  | 0.832623  |
| Tl               | -1.991810               | 1.100312  | 1.884369  |
| Si               | 0.750545                | 0.124308  | -1.780343 |
| Si               | 1.495285                | -1.922183 | 2.060177  |
| C                | 0.189977                | -1.762226 | -1.791272 |
| H                | 0.620437                | -2.065960 | -0.825610 |

|    |           |           |           |
|----|-----------|-----------|-----------|
| C  | 0.719145  | -2.790532 | -2.795699 |
| H  | 1.815616  | -2.838196 | -2.773268 |
| H  | 0.403861  | -2.588754 | -3.824618 |
| H  | 0.339585  | -3.794392 | -2.532411 |
| C  | -1.333712 | -1.915494 | -1.627278 |
| H  | -1.863871 | -1.789385 | -2.581908 |
| H  | -1.749374 | -1.190152 | -0.909110 |
| H  | -1.574731 | -2.924507 | -1.248482 |
| C  | 0.001243  | -3.136947 | 1.730523  |
| H  | 0.111131  | -3.337818 | 0.651518  |
| C  | -0.073017 | -4.502054 | 2.440277  |
| H  | 0.894206  | -5.000641 | 2.557226  |
| H  | -0.734425 | -5.184178 | 1.876269  |
| H  | -0.515218 | -4.386416 | 3.436944  |
| C  | -1.378725 | -2.475952 | 1.921151  |
| H  | -1.514272 | -2.119937 | 2.959655  |
| H  | -2.187408 | -3.200331 | 1.718786  |
| H  | -1.502916 | -1.625362 | 1.237615  |
| C  | 2.545114  | 0.462669  | -2.454127 |
| H  | 3.104378  | -0.287396 | -1.852949 |
| C  | -0.709310 | 1.249484  | -2.399834 |
| H  | -1.481993 | 0.849067  | -1.709016 |
| C  | 3.094584  | -2.594571 | 1.158652  |
| H  | 2.814232  | -2.298058 | 0.122648  |
| C  | 1.508683  | -1.446183 | 3.963441  |
| H  | 0.405776  | -1.385761 | 4.109649  |
| Si | -1.568767 | 0.893320  | -4.088760 |
| Si | -0.872752 | 3.113616  | -1.999953 |
| Si | 3.477071  | 2.107683  | -1.952253 |
| Si | 3.076307  | 0.083121  | -4.263266 |
| C  | -3.400171 | 0.556070  | -3.740376 |
| H  | -3.931206 | 1.456074  | -3.395833 |
| H  | -3.533254 | -0.225659 | -2.975141 |
| H  | -3.899584 | 0.208391  | -4.661608 |
| C  | -1.524954 | 2.301115  | -5.355103 |

|   |           |           |           |
|---|-----------|-----------|-----------|
| H | -1.946571 | 3.248299  | -4.990009 |
| H | -2.136906 | 1.978486  | -6.216525 |
| H | -0.515257 | 2.506646  | -5.739824 |
| C | -0.936655 | -0.601455 | -5.049170 |
| H | -1.253212 | -1.554419 | -4.604405 |
| H | 0.154444  | -0.616953 | -5.160095 |
| H | -1.369721 | -0.554511 | -6.063679 |
| C | 2.197674  | 1.236208  | -5.482090 |
| H | 2.896694  | 1.992087  | -5.873053 |
| H | 1.364061  | 1.772609  | -5.009697 |
| H | 1.792708  | 0.679974  | -6.342697 |
| C | 2.876120  | -1.686475 | -4.897528 |
| H | 3.431074  | -1.737235 | -5.851218 |
| H | 1.843689  | -1.991846 | -5.101852 |
| H | 3.327522  | -2.429450 | -4.221214 |
| C | 4.947207  | 0.304936  | -4.487886 |
| H | 5.293637  | 1.344258  | -4.418303 |
| H | 5.208856  | -0.064822 | -5.494844 |
| H | 5.522723  | -0.291051 | -3.761454 |
| C | 3.506522  | 3.410994  | -3.330015 |
| H | 3.719332  | 4.387440  | -2.859369 |
| H | 2.560936  | 3.514256  | -3.873549 |
| H | 4.300724  | 3.224040  | -4.068245 |
| C | 5.297642  | 1.688814  | -1.596439 |
| H | 5.612723  | 2.164553  | -0.654751 |
| H | 5.953419  | 2.067257  | -2.395470 |
| H | 5.484773  | 0.613146  | -1.500469 |
| C | 2.883930  | 3.051153  | -0.426366 |
| H | 3.770764  | 3.491156  | 0.063016  |
| H | 2.379926  | 2.414938  | 0.315444  |
| H | 2.205908  | 3.875822  | -0.688501 |
| C | -2.702683 | 3.611102  | -2.121258 |
| H | -3.113009 | 3.612190  | -3.141073 |
| H | -2.801275 | 4.637359  | -1.724203 |
| H | -3.341063 | 2.958423  | -1.500442 |

|    |           |           |           |
|----|-----------|-----------|-----------|
| C  | -0.469708 | 3.619933  | -0.216083 |
| H  | 0.241853  | 2.964856  | 0.303323  |
| H  | -1.398925 | 3.673740  | 0.382159  |
| H  | -0.040980 | 4.637398  | -0.213175 |
| C  | 0.091833  | 4.258641  | -3.155653 |
| H  | 0.970819  | 4.690133  | -2.655773 |
| H  | -0.559321 | 5.095321  | -3.461643 |
| H  | 0.436139  | 3.765442  | -4.073143 |
| Si | 2.003140  | -2.706233 | 5.350685  |
| Si | 2.049636  | 0.312499  | 4.604246  |
| Si | 3.356134  | -4.478270 | 0.916027  |
| Si | 4.767723  | -1.662170 | 1.301644  |
| C  | 3.823206  | -3.181367 | 5.336049  |
| H  | 4.471852  | -2.355353 | 5.660093  |
| H  | 4.166801  | -3.516948 | 4.351800  |
| H  | 3.973454  | -4.016889 | 6.041992  |
| C  | 1.647232  | -2.025162 | 7.087300  |
| H  | 1.824036  | -2.849283 | 7.800651  |
| H  | 0.598285  | -1.710411 | 7.207481  |
| H  | 2.291107  | -1.188800 | 7.389527  |
| C  | 1.029016  | -4.326661 | 5.448731  |
| H  | 1.310306  | -4.790640 | 6.410619  |
| H  | 1.242265  | -5.057288 | 4.661038  |
| H  | -0.059681 | -4.159149 | 5.478450  |
| C  | 0.791804  | 0.862811  | 5.925113  |
| H  | 1.079282  | 0.600030  | 6.952032  |
| H  | -0.208917 | 0.433206  | 5.742297  |
| H  | 0.690986  | 1.960382  | 5.879435  |
| C  | 3.795021  | 0.301956  | 5.344526  |
| H  | 4.522065  | -0.210873 | 4.697238  |
| H  | 3.851238  | -0.160402 | 6.341096  |
| H  | 4.131887  | 1.347969  | 5.444785  |
| C  | 2.062768  | 1.845439  | 3.496129  |
| H  | 2.515170  | 2.649799  | 4.108701  |
| H  | 1.046345  | 2.164570  | 3.223449  |



|   |          |           |           |
|---|----------|-----------|-----------|
| H | 2.628614 | 1.760591  | 2.563550  |
| C | 3.593042 | -5.442281 | 2.520414  |
| H | 4.597227 | -5.268206 | 2.938298  |
| H | 3.512056 | -6.522295 | 2.307308  |
| H | 2.864849 | -5.200735 | 3.304715  |
| C | 1.960774 | -5.248679 | -0.111964 |
| H | 2.379145 | -6.077300 | -0.708429 |
| H | 1.531548 | -4.524242 | -0.818789 |
| H | 1.138613 | -5.658350 | 0.489205  |
| C | 4.892844 | -4.901423 | -0.108613 |
| H | 5.841827 | -4.663412 | 0.394311  |
| H | 4.893153 | -4.413098 | -1.095537 |
| H | 4.875950 | -5.992209 | -0.282715 |
| C | 5.727513 | -1.807415 | -0.332205 |
| H | 6.427951 | -0.958694 | -0.395826 |
| H | 5.079300 | -1.770855 | -1.222854 |
| H | 6.328543 | -2.724030 | -0.395682 |
| C | 5.930909 | -2.313347 | 2.637691  |
| H | 6.933432 | -1.888322 | 2.453545  |
| H | 6.034436 | -3.409307 | 2.636479  |
| H | 5.628798 | -2.004883 | 3.647509  |
| C | 4.616855 | 0.190509  | 1.574774  |
| H | 5.592597 | 0.653541  | 1.347433  |
| H | 4.357265 | 0.459588  | 2.605508  |
| H | 3.864753 | 0.637811  | 0.909987  |

-----  
-----  
(Tbt)2Tl-Sb  
-----

| Atomic<br>Number | Coordinates (Angstroms) |          |           |
|------------------|-------------------------|----------|-----------|
|                  | X                       | Y        | Z         |
| Tl               | 1.666902                | 1.372511 | 0.713318  |
| Sb               | -1.085404               | 0.489654 | 0.356972  |
| C                | 2.742346                | 1.928199 | -1.316016 |

|    |           |           |           |
|----|-----------|-----------|-----------|
| C  | 4.275999  | 2.171143  | -3.742899 |
| C  | 3.381234  | 3.170135  | -1.645176 |
| C  | 2.771338  | 0.852183  | -2.282874 |
| C  | 3.557158  | 1.001701  | -3.449769 |
| C  | 4.163888  | 3.228453  | -2.830637 |
| H  | 3.592720  | 0.184123  | -4.173934 |
| H  | 4.673526  | 4.165448  | -3.064891 |
| C  | 2.452830  | 1.420513  | 2.930920  |
| C  | 3.466314  | 2.723775  | 5.297386  |
| C  | 3.816400  | 1.226388  | 3.345869  |
| C  | 1.550720  | 2.017526  | 3.879526  |
| C  | 2.093810  | 2.677427  | 5.014286  |
| C  | 4.291482  | 1.949635  | 4.466144  |
| H  | 1.398008  | 3.136956  | 5.721065  |
| H  | 5.345159  | 1.849844  | 4.739653  |
| C  | 1.955955  | -0.454108 | -2.200381 |
| H  | 1.492060  | -0.553192 | -1.205689 |
| C  | 3.251765  | 4.557583  | -0.974010 |
| H  | 3.560647  | 5.229269  | -1.798509 |
| C  | 5.043119  | 2.295816  | -5.047376 |
| H  | 5.027235  | 1.294577  | -5.521253 |
| C  | 4.783355  | 0.099764  | 2.902641  |
| H  | 5.456202  | 0.037993  | 3.782315  |
| C  | 0.007356  | 1.881948  | 3.958917  |
| H  | -0.143237 | 2.068193  | 5.046517  |
| C  | 4.042167  | 3.408829  | 6.524347  |
| H  | 5.140318  | 3.434056  | 6.386031  |
| Si | 2.851193  | -2.153278 | -2.420679 |
| Si | 0.404036  | -0.381212 | -3.383396 |
| Si | 4.127030  | 3.402884  | -6.315117 |
| Si | 6.909034  | 2.668189  | -4.885053 |
| Si | 1.532971  | 5.352473  | -0.749684 |
| Si | 4.576646  | 5.150476  | 0.266832  |
| Si | -1.166367 | 3.326147  | 3.458299  |
| Si | -0.806340 | 0.118588  | 4.022454  |

|    |           |           |           |
|----|-----------|-----------|-----------|
| Si | 3.812741  | 2.334735  | 8.098003  |
| Si | 3.594234  | 5.248281  | 6.771589  |
| Si | 4.105403  | -1.674195 | 3.127113  |
| Si | 6.173025  | 0.384921  | 1.637203  |
| C  | 3.007993  | -2.773119 | -4.198987 |
| H  | 3.373836  | -2.001483 | -4.890919 |
| H  | 2.056113  | -3.160795 | -4.587716 |
| H  | 3.731235  | -3.604356 | -4.220689 |
| C  | 1.882871  | -3.469186 | -1.465813 |
| H  | 2.547394  | -4.310724 | -1.223939 |
| H  | 1.050116  | -3.866611 | -2.056958 |
| H  | 1.478056  | -3.084047 | -0.530483 |
| C  | 4.611288  | -2.096411 | -1.762791 |
| H  | 5.213477  | -1.354816 | -2.305569 |
| H  | 5.081063  | -3.083487 | -1.895691 |
| H  | 4.639904  | -1.850834 | -0.697433 |
| C  | -0.852714 | -1.715407 | -2.903751 |
| H  | -0.558788 | -2.707894 | -3.273070 |
| H  | -1.837674 | -1.474371 | -3.347294 |
| H  | -0.990694 | -1.776648 | -1.817160 |
| C  | 0.803502  | -0.588287 | -5.223110 |
| H  | 1.766385  | -0.132896 | -5.496280 |
| H  | 0.023270  | -0.077142 | -5.816752 |
| H  | 0.814120  | -1.641466 | -5.538805 |
| C  | -0.424936 | 1.318010  | -3.285742 |
| H  | 0.279315  | 2.112694  | -3.596815 |
| H  | -0.782075 | 1.550127  | -2.257030 |
| H  | -1.310767 | 1.355803  | -3.957057 |
| C  | 2.447795  | 2.621568  | -6.670342 |
| H  | 2.563318  | 1.598611  | -7.064812 |
| H  | 1.896757  | 3.213451  | -7.420882 |
| H  | 1.833888  | 2.568956  | -5.756360 |
| C  | 5.058382  | 3.499691  | -7.954094 |
| H  | 5.979949  | 4.097236  | -7.882737 |
| H  | 4.415961  | 3.974679  | -8.714743 |

|   |           |           |           |
|---|-----------|-----------|-----------|
| H | 5.326660  | 2.498177  | -8.326243 |
| C | 3.824502  | 5.151409  | -5.679896 |
| H | 4.752813  | 5.664879  | -5.390725 |
| H | 3.151111  | 5.143297  | -4.808969 |
| H | 3.342480  | 5.752727  | -6.469435 |
| C | 1.564269  | 7.070169  | -1.542337 |
| H | 2.208096  | 7.774104  | -0.999159 |
| H | 0.545233  | 7.486666  | -1.554946 |
| H | 1.915864  | 7.013946  | -2.584443 |
| C | 0.208074  | 4.401582  | -1.668876 |
| H | 0.061533  | 3.391845  | -1.278027 |
| H | 0.482060  | 4.304301  | -2.729861 |
| H | -0.748207 | 4.937692  | -1.612018 |
| C | 1.040673  | 5.561062  | 1.044226  |
| H | -0.007761 | 5.869890  | 1.119694  |
| H | 1.644996  | 6.327381  | 1.546633  |
| H | 1.163971  | 4.630547  | 1.606762  |
| C | -0.360636 | 4.940688  | 4.026365  |
| H | 0.686069  | 5.031861  | 3.720644  |
| H | -0.394834 | 5.001266  | 5.125760  |
| H | -0.916214 | 5.800329  | 3.626210  |
| C | -1.698157 | 3.425172  | 1.653016  |
| H | -2.206010 | 4.376895  | 1.478138  |
| H | -2.415917 | 2.631130  | 1.434360  |
| H | -0.872666 | 3.361035  | 0.956550  |
| C | -2.755866 | 3.261351  | 4.503530  |
| H | -2.568214 | 2.861633  | 5.516754  |
| H | -3.550073 | 2.659044  | 4.035436  |
| H | -3.144556 | 4.286202  | 4.620980  |
| C | -2.674568 | 0.058092  | 3.635389  |
| H | -3.292545 | 0.463489  | 4.462042  |
| H | -2.966417 | -1.008855 | 3.501349  |
| H | -2.950355 | 0.583087  | 2.690158  |
| C | -0.676801 | -0.391730 | 5.858492  |
| H | 0.377642  | -0.436899 | 6.183123  |

|   |           |           |           |
|---|-----------|-----------|-----------|
| H | -1.129712 | -1.389035 | 6.014051  |
| H | -1.207734 | 0.327477  | 6.513406  |
| C | 0.010489  | -1.275479 | 3.021217  |
| H | 0.930407  | -0.921875 | 2.562547  |
| H | -0.659611 | -1.646973 | 2.235355  |
| H | 0.255594  | -2.121081 | 3.686669  |
| C | 2.006170  | 1.910739  | 8.414642  |
| H | 1.918483  | 1.316563  | 9.340489  |
| H | 1.590696  | 1.309309  | 7.590824  |
| H | 1.378492  | 2.806866  | 8.532997  |
| C | 4.760542  | 0.723329  | 7.845022  |
| H | 5.824033  | 0.920948  | 7.635180  |
| H | 4.344083  | 0.152899  | 7.002096  |
| H | 4.702238  | 0.095291  | 8.749275  |
| C | 4.527662  | 3.159385  | 9.637776  |
| H | 5.560966  | 3.502699  | 9.472820  |
| H | 4.549998  | 2.429511  | 10.464674 |
| H | 3.930269  | 4.019467  | 9.976814  |
| C | 4.951786  | 6.091606  | 7.780504  |
| H | 5.950828  | 5.816473  | 7.405774  |
| H | 4.908802  | 5.840286  | 8.849195  |
| H | 4.852640  | 7.185844  | 7.691478  |
| C | 3.544246  | 6.124419  | 5.106852  |
| H | 4.514596  | 6.039539  | 4.595898  |
| H | 3.327149  | 7.195040  | 5.249850  |
| H | 2.773138  | 5.701141  | 4.450428  |
| C | 1.942348  | 5.513359  | 7.636648  |
| H | 1.692139  | 6.586951  | 7.639051  |
| H | 1.966054  | 5.176390  | 8.684509  |
| H | 1.123574  | 4.984047  | 7.126849  |
| C | 4.521527  | 7.033446  | 0.465449  |
| H | 4.586851  | 7.548205  | -0.505408 |
| H | 5.392376  | 7.349173  | 1.063957  |
| H | 3.622142  | 7.390801  | 0.985715  |
| C | 6.289291  | 4.788040  | -0.436818 |

|   |          |           |           |
|---|----------|-----------|-----------|
| H | 6.425226 | 5.294015  | -1.405436 |
| H | 6.457405 | 3.714011  | -0.585847 |
| H | 7.063262 | 5.164209  | 0.251535  |
| C | 4.426570 | 4.373951  | 1.953354  |
| H | 3.450411 | 4.553316  | 2.418905  |
| H | 4.569212 | 3.290511  | 1.889034  |
| H | 5.197735 | 4.769410  | 2.631664  |
| C | 7.581450 | 1.823565  | -3.342470 |
| H | 8.682060 | 1.879034  | -3.327002 |
| H | 7.289922 | 0.762114  | -3.315905 |
| H | 7.199223 | 2.307540  | -2.433187 |
| C | 7.309484 | 4.505200  | -4.767278 |
| H | 8.383678 | 4.639433  | -4.558347 |
| H | 6.751743 | 4.990707  | -3.952282 |
| H | 7.085345 | 5.040993  | -5.702496 |
| C | 7.820952 | 1.933436  | -6.366662 |
| H | 8.907105 | 1.943418  | -6.178242 |
| H | 7.639282 | 2.488622  | -7.297815 |
| H | 7.520787 | 0.885817  | -6.531399 |
| C | 3.050982 | -1.681611 | 4.692569  |
| H | 3.703464 | -1.589815 | 5.575011  |
| H | 2.506564 | -2.635198 | 4.777787  |
| H | 2.327184 | -0.857838 | 4.718416  |
| C | 5.504218 | -2.887830 | 3.527363  |
| H | 6.016236 | -3.268421 | 2.635074  |
| H | 5.077808 | -3.753153 | 4.059444  |
| H | 6.255629 | -2.432218 | 4.190246  |
| C | 3.151544 | -2.372588 | 1.667322  |
| H | 3.814652 | -2.965100 | 1.026350  |
| H | 2.692920 | -1.601143 | 1.047149  |
| H | 2.355874 | -3.038356 | 2.017422  |
| C | 5.606830 | 0.932186  | -0.044192 |
| H | 6.446876 | 0.905365  | -0.752842 |
| H | 5.216909 | 1.954053  | -0.019068 |
| H | 4.821939 | 0.288326  | -0.447624 |

|   |          |           |          |
|---|----------|-----------|----------|
| C | 7.317092 | 1.712560  | 2.343169 |
| H | 8.160866 | 1.884313  | 1.656019 |
| H | 7.729377 | 1.397222  | 3.315211 |
| H | 6.791372 | 2.666489  | 2.485719 |
| C | 7.263958 | -1.135556 | 1.381412 |
| H | 8.097729 | -0.847383 | 0.720322 |
| H | 6.731270 | -1.963042 | 0.892874 |
| H | 7.699034 | -1.504949 | 2.320615 |

Tbt-Tl-Sb-Tbt

| Atomic<br>Number | Coordinates (Angstroms) |           |           |
|------------------|-------------------------|-----------|-----------|
|                  | X                       | Y         | Z         |
| Tl               | -0.825229               | -1.165206 | -0.016720 |
| Sb               | 0.903552                | 0.846311  | -0.941760 |
| C                | 2.916658                | 0.427035  | -0.388734 |
| C                | 5.623272                | -0.029446 | 0.350133  |
| C                | 3.668587                | 1.479270  | 0.223312  |
| C                | 3.530314                | -0.835850 | -0.679376 |
| C                | 4.870976                | -1.029357 | -0.294194 |
| C                | 5.004779                | 1.215217  | 0.586146  |
| H                | 5.348748                | -1.989657 | -0.502299 |
| H                | 5.579454                | 2.010165  | 1.065502  |
| C                | -3.134294               | -0.668767 | 0.216182  |
| C                | -5.746468               | 0.308160  | 0.729798  |
| C                | -3.689415               | -0.805323 | 1.518904  |
| C                | -3.863539               | -0.053080 | -0.841870 |
| C                | -5.162245               | 0.427200  | -0.543373 |
| C                | -4.989692               | -0.301739 | 1.744743  |
| H                | -5.740777               | 0.887404  | -1.347578 |
| H                | -5.436483               | -0.407388 | 2.739033  |
| C                | 2.801166                | -1.971036 | -1.390758 |
| H                | 1.738771                | -1.678101 | -1.494272 |

|    |           |           |           |
|----|-----------|-----------|-----------|
| C  | 3.161859  | 2.908699  | 0.459484  |
| H  | 4.061336  | 3.440676  | 0.833576  |
| C  | 7.055648  | -0.296881 | 0.754664  |
| H  | 7.275085  | -1.350345 | 0.487595  |
| C  | -3.030958 | -1.493895 | 2.724132  |
| H  | -3.850905 | -1.521476 | 3.469862  |
| C  | -3.437374 | 0.149346  | -2.310772 |
| H  | -4.413014 | 0.326064  | -2.807684 |
| C  | -7.159379 | 0.767324  | 1.008234  |
| H  | -7.382557 | 0.498491  | 2.060597  |
| Si | 2.713842  | -3.608013 | -0.423548 |
| Si | 3.313095  | -2.131124 | -3.224576 |
| Si | 8.276666  | 0.687111  | -0.324508 |
| Si | 7.315765  | -0.259767 | 2.641474  |
| Si | 2.818480  | 3.983338  | -1.100365 |
| Si | 2.052661  | 3.257927  | 1.989442  |
| Si | -2.655961 | 1.853674  | -2.792184 |
| Si | -2.987279 | -1.344288 | -3.403046 |
| Si | -8.454578 | -0.226311 | 0.024595  |
| Si | -7.302350 | 2.664235  | 1.014218  |
| Si | -2.740929 | -3.386923 | 2.606567  |
| Si | -1.829592 | -0.489754 | 3.838233  |
| C  | 4.165633  | -4.768186 | -0.756670 |
| H  | 5.134066  | -4.286873 | -0.546104 |
| H  | 4.184309  | -5.118984 | -1.801051 |
| H  | 4.090587  | -5.659500 | -0.109733 |
| C  | 1.137417  | -4.558394 | -0.879924 |
| H  | 1.037511  | -5.446520 | -0.231532 |
| H  | 1.142627  | -4.908978 | -1.922754 |
| H  | 0.220072  | -3.959332 | -0.744125 |
| C  | 2.663267  | -3.250078 | 1.426128  |
| H  | 3.640095  | -2.891788 | 1.784573  |
| H  | 2.399582  | -4.159169 | 1.993301  |
| H  | 1.926590  | -2.467774 | 1.669530  |
| C  | 2.348977  | -3.524322 | -4.066418 |



|   |           |           |           |
|---|-----------|-----------|-----------|
| H | 2.667464  | -4.527437 | -3.740260 |
| H | 2.514429  | -3.466700 | -5.156690 |
| H | 1.264783  | -3.437612 | -3.895101 |
| C | 5.155166  | -2.457505 | -3.430639 |
| H | 5.747094  | -1.616526 | -3.039716 |
| H | 5.393936  | -2.566568 | -4.502850 |
| H | 5.486192  | -3.373251 | -2.918144 |
| C | 2.901997  | -0.531417 | -4.124823 |
| H | 3.533028  | 0.294989  | -3.764600 |
| H | 1.853020  | -0.237926 | -3.965472 |
| H | 3.071513  | -0.642613 | -5.210003 |
| C | 8.002149  | 0.175090  | -2.117826 |
| H | 8.108699  | -0.915052 | -2.245945 |
| H | 8.733736  | 0.665035  | -2.783480 |
| H | 6.992368  | 0.455652  | -2.459206 |
| C | 10.051108 | 0.258294  | 0.155751  |
| H | 10.331073 | 0.677959  | 1.135398  |
| H | 10.753719 | 0.664114  | -0.592279 |
| H | 10.205960 | -0.832712 | 0.200727  |
| C | 8.042330  | 2.555013  | -0.213039 |
| H | 8.102298  | 2.932581  | 0.819098  |
| H | 7.070312  | 2.861051  | -0.631472 |
| H | 8.830742  | 3.059077  | -0.799047 |
| C | 3.877195  | 5.539070  | -0.946182 |
| H | 3.592597  | 6.142973  | -0.069461 |
| H | 3.759826  | 6.173757  | -1.841673 |
| H | 4.947161  | 5.287584  | -0.850434 |
| C | 3.339249  | 3.075212  | -2.665933 |
| H | 2.658484  | 2.246725  | -2.915957 |
| H | 4.351415  | 2.651754  | -2.563364 |
| H | 3.338476  | 3.773735  | -3.520424 |
| C | 1.031782  | 4.554882  | -1.325325 |
| H | 0.695515  | 5.218689  | -0.512727 |
| H | 0.326309  | 3.713265  | -1.379819 |
| H | 0.947265  | 5.116910  | -2.272173 |

|   |            |           |           |
|---|------------|-----------|-----------|
| C | -2.435897  | 2.907158  | -1.249344 |
| H | -1.732123  | 2.469337  | -0.525783 |
| H | -3.404648  | 3.028637  | -0.738641 |
| H | -2.065096  | 3.909844  | -1.520384 |
| C | -1.081824  | 1.786787  | -3.836571 |
| H | -0.265081  | 1.210430  | -3.378436 |
| H | -0.706719  | 2.815622  | -3.981290 |
| H | -1.275340  | 1.363340  | -4.835588 |
| C | -3.906284  | 2.729482  | -3.907359 |
| H | -4.885149  | 2.861317  | -3.418019 |
| H | -4.064551  | 2.170369  | -4.844621 |
| H | -3.528769  | 3.730170  | -4.182066 |
| C | -3.512766  | -0.886901 | -5.162859 |
| H | -4.559166  | -0.539133 | -5.194465 |
| H | -3.438561  | -1.774562 | -5.814952 |
| H | -2.884770  | -0.099641 | -5.609573 |
| C | -4.034710  | -2.805482 | -2.848691 |
| H | -3.774335  | -3.124615 | -1.828400 |
| H | -3.900741  | -3.667006 | -3.524874 |
| H | -5.104505  | -2.537598 | -2.846110 |
| C | -1.180053  | -1.891841 | -3.503540 |
| H | -0.888305  | -2.574468 | -2.687978 |
| H | -0.469389  | -1.053070 | -3.501658 |
| H | -1.037657  | -2.452623 | -4.444303 |
| C | -8.812889  | 0.496847  | -1.680691 |
| H | -9.492839  | -0.171156 | -2.237359 |
| H | -7.896483  | 0.610218  | -2.282200 |
| H | -9.298748  | 1.483884  | -1.615054 |
| C | -7.840061  | -1.995945 | -0.190217 |
| H | -7.587597  | -2.451985 | 0.781963  |
| H | -6.937809  | -2.040082 | -0.820429 |
| H | -8.620579  | -2.617971 | -0.662472 |
| C | -10.053789 | -0.278114 | 1.025471  |
| H | -9.856651  | -0.598768 | 2.062928  |
| H | -10.760874 | -1.001361 | 0.584202  |

|   |            |           |           |
|---|------------|-----------|-----------|
| H | -10.558687 | 0.699110  | 1.069411  |
| C | -9.053746  | 3.159198  | 1.511835  |
| H | -9.378141  | 2.633629  | 2.425603  |
| H | -9.788049  | 2.938264  | 0.720226  |
| H | -9.100325  | 4.242585  | 1.716065  |
| C | -6.091792  | 3.321145  | 2.301087  |
| H | -6.288222  | 2.883781  | 3.294900  |
| H | -6.173035  | 4.417929  | 2.394987  |
| H | -5.051202  | 3.078345  | 2.030544  |
| C | -6.887419  | 3.450170  | -0.647763 |
| H | -7.029912  | 4.543167  | -0.585146 |
| H | -7.525802  | 3.077643  | -1.463173 |
| H | -5.838342  | 3.270092  | -0.928714 |
| C | 2.362794   | 5.066516  | 2.462852  |
| H | 3.435725   | 5.302686  | 2.556588  |
| H | 1.887398   | 5.276570  | 3.437245  |
| H | 1.925145   | 5.768165  | 1.733442  |
| C | 2.679839   | 2.168045  | 3.392376  |
| H | 3.742215   | 2.369501  | 3.608122  |
| H | 2.585714   | 1.100925  | 3.140273  |
| H | 2.104309   | 2.354875  | 4.315570  |
| C | 0.178726   | 3.101997  | 1.887326  |
| H | -0.246336  | 3.712139  | 1.077189  |
| H | -0.144006  | 2.068117  | 1.718401  |
| H | -0.256087  | 3.456683  | 2.839166  |
| C | 5.775855   | -0.935111 | 3.492540  |
| H | 5.938120   | -0.999418 | 4.582838  |
| H | 5.533351   | -1.947477 | 3.128647  |
| H | 4.896754   | -0.296820 | 3.313473  |
| C | 7.662013   | 1.470836  | 3.308407  |
| H | 7.720809   | 1.444489  | 4.410340  |
| H | 6.864881   | 2.182000  | 3.037976  |
| H | 8.617720   | 1.874801  | 2.936585  |
| C | 8.764970   | -1.391305 | 3.072148  |
| H | 8.809960   | -1.560538 | 4.161686  |

|   |           |           |          |
|---|-----------|-----------|----------|
| H | 9.735124  | -0.976848 | 2.758201 |
| H | 8.650915  | -2.377028 | 2.588973 |
| C | -3.416374 | -4.075026 | 0.990884 |
| H | -4.431598 | -3.696548 | 0.793459 |
| H | -3.457755 | -5.176603 | 1.040795 |
| H | -2.793442 | -3.804771 | 0.124177 |
| C | -3.704690 | -4.166305 | 4.029965 |
| H | -3.326775 | -3.835907 | 5.010905 |
| H | -3.636686 | -5.267085 | 3.997393 |
| H | -4.772664 | -3.894354 | 3.974003 |
| C | -0.942586 | -3.946719 | 2.778527 |
| H | -0.522593 | -3.695022 | 3.765647 |
| H | -0.265877 | -3.524748 | 2.018550 |
| H | -0.894330 | -5.044391 | 2.670505 |
| C | 0.018708  | -0.553203 | 3.460632 |
| H | 0.546962  | -0.036382 | 4.280739 |
| H | 0.314446  | -0.040383 | 2.532017 |
| H | 0.409410  | -1.580703 | 3.426451 |
| C | -2.402713 | 1.299830  | 3.858113 |
| H | -1.756803 | 1.903190  | 4.518664 |
| H | -3.437375 | 1.376079  | 4.230481 |
| H | -2.371659 | 1.746832  | 2.853659 |
| C | -2.022834 | -1.189627 | 5.587480 |
| H | -1.490958 | -0.543162 | 6.307386 |
| H | -1.604511 | -2.204224 | 5.691468 |
| H | -3.080736 | -1.228108 | 5.898166 |

-----  
-  
-----  
-  
Tl-Sb(Tbt)<sub>2</sub>  
-----  
-

| Atomic<br>Number | Coordinates (Angstroms) |   |   |
|------------------|-------------------------|---|---|
|                  | X                       | Y | Z |

---

|    |           |           |           |
|----|-----------|-----------|-----------|
| Tl | 6.461853  | -0.834895 | 0.441057  |
| Sb | 3.462869  | 0.343300  | 0.857679  |
| C  | 3.403803  | 1.614840  | -1.102981 |
| C  | 2.533687  | 2.572737  | -3.718101 |
| C  | 3.568040  | 2.994681  | -1.480196 |
| C  | 2.981578  | 0.711821  | -2.158399 |
| C  | 2.516267  | 1.206182  | -3.391650 |
| C  | 3.092939  | 3.420064  | -2.753771 |
| H  | 2.174909  | 0.488526  | -4.142440 |
| H  | 3.223533  | 4.472292  | -3.011283 |
| C  | 3.113042  | 1.181310  | 2.906303  |
| C  | 2.997082  | 2.863187  | 5.243768  |
| C  | 4.110385  | 1.065682  | 3.946777  |
| C  | 1.896882  | 1.873850  | 3.246528  |
| C  | 1.910197  | 2.752855  | 4.361183  |
| C  | 4.041703  | 1.944327  | 5.048467  |
| H  | 1.002029  | 3.318433  | 4.575501  |
| H  | 4.808046  | 1.869125  | 5.827143  |
| C  | 3.148596  | -0.810357 | -2.107135 |
| H  | 3.530734  | -1.104231 | -1.112828 |
| C  | 4.378572  | 4.126529  | -0.803073 |
| H  | 4.929110  | 4.540676  | -1.674347 |
| C  | 2.112619  | 3.053724  | -5.096483 |
| H  | 1.638112  | 2.192585  | -5.609908 |
| C  | 5.108473  | -0.104661 | 4.200883  |
| H  | 5.085521  | -0.085505 | 5.311985  |
| C  | 0.477678  | 1.633789  | 2.669988  |
| H  | -0.143437 | 1.991754  | 3.520897  |
| C  | 2.982446  | 3.754426  | 6.471056  |
| H  | 3.903197  | 3.518673  | 7.043861  |
| Si | 4.554984  | -1.372226 | -3.262401 |
| Si | 1.548084  | -1.855448 | -2.165903 |
| Si | 0.746248  | 4.383422  | -5.122599 |

|    |           |           |           |
|----|-----------|-----------|-----------|
| Si | 3.655313  | 3.412304  | -6.161652 |
| Si | 3.479518  | 5.755159  | -0.303628 |
| Si | 5.885590  | 3.774790  | 0.269751  |
| Si | -0.283436 | 2.883181  | 1.443637  |
| Si | -0.260556 | -0.149581 | 2.701498  |
| Si | 1.590334  | 3.248112  | 7.672728  |
| Si | 3.212451  | 5.596997  | 6.055429  |
| Si | 4.355229  | -1.862127 | 4.213901  |
| Si | 7.032406  | 0.009750  | 4.177551  |
| C  | 4.086538  | -1.602206 | -5.075196 |
| H  | 3.562862  | -2.554506 | -5.246293 |
| H  | 5.000720  | -1.606443 | -5.692867 |
| H  | 3.445375  | -0.791905 | -5.447950 |
| C  | 5.197112  | -3.036239 | -2.626800 |
| H  | 4.484749  | -3.848782 | -2.843738 |
| H  | 5.354771  | -3.036065 | -1.533343 |
| H  | 6.157378  | -3.301730 | -3.101071 |
| C  | 5.965882  | -0.114651 | -3.208570 |
| H  | 5.587000  | 0.917870  | -3.236007 |
| H  | 6.641181  | -0.260863 | -4.068303 |
| H  | 6.592284  | -0.208820 | -2.305138 |
| C  | 0.126244  | -0.838061 | -1.491737 |
| H  | -0.745600 | -1.473396 | -1.264115 |
| H  | -0.181332 | -0.075722 | -2.224355 |
| H  | 0.426988  | -0.317338 | -0.573884 |
| C  | 1.840994  | -3.382851 | -1.093409 |
| H  | 2.512299  | -4.104518 | -1.587467 |
| H  | 0.890150  | -3.903134 | -0.886346 |
| H  | 2.288647  | -3.113439 | -0.124242 |
| C  | 1.031077  | -2.456382 | -3.880459 |
| H  | 0.969534  | -1.639731 | -4.617328 |
| H  | 0.026363  | -2.909281 | -3.806576 |
| H  | 1.708237  | -3.225537 | -4.283261 |
| C  | -0.430444 | 4.100038  | -3.687416 |
| H  | -0.793234 | 3.059240  | -3.663220 |

|   |           |           |           |
|---|-----------|-----------|-----------|
| H | -1.306856 | 4.766751  | -3.761444 |
| H | 0.067881  | 4.295946  | -2.729622 |
| C | -0.242435 | 4.204191  | -6.722340 |
| H | 0.340723  | 4.458453  | -7.620204 |
| H | -1.124513 | 4.867651  | -6.697665 |
| H | -0.611972 | 3.170954  | -6.842638 |
| C | 1.423696  | 6.144266  | -5.024747 |
| H | 2.004081  | 6.413861  | -5.922071 |
| H | 2.075726  | 6.293556  | -4.149969 |
| H | 0.591315  | 6.864483  | -4.940672 |
| C | 4.339373  | 7.178959  | -1.209715 |
| H | 5.365982  | 7.358304  | -0.854936 |
| H | 3.769066  | 8.113563  | -1.064960 |
| H | 4.388206  | 6.988414  | -2.296051 |
| C | 1.696984  | 5.791004  | -0.897662 |
| H | 1.159120  | 4.864199  | -0.675574 |
| H | 1.658821  | 5.946930  | -1.984916 |
| H | 1.159078  | 6.627656  | -0.421556 |
| C | 3.570582  | 6.168163  | 1.537323  |
| H | 3.235673  | 5.355986  | 2.194137  |
| H | 2.933772  | 7.043449  | 1.749359  |
| H | 4.596586  | 6.424696  | 1.842630  |
| C | 0.324974  | 4.584775  | 1.956385  |
| H | 1.416197  | 4.668809  | 1.938587  |
| H | -0.012723 | 4.803792  | 2.981766  |
| H | -0.092044 | 5.363998  | 1.300212  |
| C | -0.024745 | 2.556982  | -0.377207 |
| H | 1.028845  | 2.482540  | -0.678580 |
| H | -0.496024 | 3.366998  | -0.954512 |
| H | -0.524689 | 1.625372  | -0.674732 |
| C | -2.156136 | 2.986704  | 1.739928  |
| H | -2.424772 | 2.787832  | 2.791661  |
| H | -2.737087 | 2.299907  | 1.108332  |
| H | -2.491408 | 4.012690  | 1.507248  |
| C | -1.881835 | -0.260302 | 1.729938  |

|   |           |           |           |
|---|-----------|-----------|-----------|
| H | -2.694003 | 0.316633  | 2.195677  |
| H | -2.190675 | -1.320663 | 1.724745  |
| H | -1.791747 | 0.056831  | 0.680608  |
| C | -0.745006 | -0.451271 | 4.507082  |
| H | 0.089999  | -0.281509 | 5.202383  |
| H | -1.095108 | -1.487626 | 4.655622  |
| H | -1.566775 | 0.224778  | 4.802797  |
| C | 0.744147  | -1.624157 | 2.108646  |
| H | 1.549245  | -1.891662 | 2.803015  |
| H | 1.201735  | -1.451241 | 1.126136  |
| H | 0.060915  | -2.490982 | 2.028733  |
| C | -0.074892 | 4.025032  | 7.242613  |
| H | -0.859559 | 3.642122  | 7.918049  |
| H | -0.387420 | 3.796719  | 6.211298  |
| H | -0.050411 | 5.121947  | 7.350271  |
| C | 1.441300  | 1.370779  | 7.616201  |
| H | 2.400138  | 0.892115  | 7.878937  |
| H | 1.170088  | 1.025436  | 6.608020  |
| H | 0.675622  | 1.007749  | 8.322812  |
| C | 2.057580  | 3.751252  | 9.431287  |
| H | 3.073855  | 3.405535  | 9.687795  |
| H | 1.361005  | 3.295268  | 10.156200 |
| H | 2.027784  | 4.841326  | 9.581708  |
| C | 3.276530  | 6.615394  | 7.643956  |
| H | 3.996991  | 6.206516  | 8.371888  |
| H | 2.292149  | 6.665974  | 8.137311  |
| H | 3.584564  | 7.650583  | 7.415091  |
| C | 4.864821  | 5.763440  | 5.164370  |
| H | 5.700485  | 5.481157  | 5.828118  |
| H | 5.037519  | 6.799192  | 4.825493  |
| H | 4.903579  | 5.109026  | 4.281565  |
| C | 1.839382  | 6.278741  | 4.969778  |
| H | 2.048082  | 7.331888  | 4.713839  |
| H | 0.860380  | 6.242907  | 5.472817  |
| H | 1.754710  | 5.721481  | 4.028324  |



|   |          |           |           |
|---|----------|-----------|-----------|
| C | 6.997587 | 5.309103  | 0.270232  |
| H | 7.206109 | 5.672426  | -0.750060 |
| H | 7.966358 | 5.039320  | 0.728229  |
| H | 6.586443 | 6.148127  | 0.851759  |
| C | 6.920727 | 2.451429  | -0.596531 |
| H | 7.379918 | 2.857978  | -1.513375 |
| H | 6.272061 | 1.619533  | -0.906622 |
| H | 7.741965 | 2.075938  | 0.039327  |
| C | 5.484954 | 3.356465  | 2.049104  |
| H | 4.460795 | 3.645879  | 2.313242  |
| H | 5.550638 | 2.281540  | 2.237119  |
| H | 6.171856 | 3.874050  | 2.735561  |
| C | 4.609193 | 1.805889  | -6.395910 |
| H | 5.525541 | 1.975198  | -6.987750 |
| H | 4.005009 | 1.050980  | -6.925888 |
| H | 4.907518 | 1.375320  | -5.429121 |
| C | 4.814378 | 4.660408  | -5.351244 |
| H | 5.657262 | 4.879694  | -6.029742 |
| H | 5.233135 | 4.259258  | -4.414512 |
| H | 4.315437 | 5.613717  | -5.118949 |
| C | 3.158803 | 4.046806  | -7.869442 |
| H | 4.049952 | 4.128817  | -8.515797 |
| H | 2.687058 | 5.041090  | -7.826623 |
| H | 2.451428 | 3.360913  | -8.365064 |
| C | 2.695524 | -1.668343 | 5.079125  |
| H | 2.871574 | -1.445552 | 6.145347  |
| H | 2.076893 | -2.578359 | 5.024353  |
| H | 2.122657 | -0.831370 | 4.663983  |
| C | 5.386610 | -2.955713 | 5.367816  |
| H | 6.377717 | -3.225118 | 4.975222  |
| H | 4.833765 | -3.898311 | 5.529617  |
| H | 5.526111 | -2.491588 | 6.358174  |
| C | 4.231105 | -2.829172 | 2.596614  |
| H | 5.232517 | -3.118146 | 2.228459  |
| H | 3.705734 | -2.293250 | 1.791973  |

|   |          |           |          |
|---|----------|-----------|----------|
| H | 3.682451 | -3.769413 | 2.779923 |
| C | 7.907639 | -1.538902 | 3.480941 |
| H | 7.256914 | -2.239437 | 2.934381 |
| H | 8.350297 | -2.116767 | 4.309310 |
| H | 8.738527 | -1.255757 | 2.811121 |
| C | 7.845535 | 1.498972  | 3.361650 |
| H | 8.928501 | 1.433241  | 3.572287 |
| H | 7.475783 | 2.441960  | 3.788429 |
| H | 7.721666 | 1.558329  | 2.270195 |
| C | 7.544374 | 0.117643  | 5.996743 |
| H | 8.643235 | 0.129461  | 6.101385 |
| H | 7.163535 | -0.739214 | 6.577309 |
| H | 7.155716 | 1.038117  | 6.465431 |

(Ar\*)2Tl-Sb

| Atomic<br>Number | Coordinates (Angstroms) |           |          |
|------------------|-------------------------|-----------|----------|
|                  | X                       | Y         | Z        |
| Tl               | -0.376376               | -0.507347 | 8.517925 |
| Sb               | -2.285884               | 1.777014  | 8.442431 |
| H                | 0.336036                | -0.999414 | 3.084422 |
| C                | 0.806011                | -0.622114 | 3.994555 |
| C                | 1.926106                | 0.405390  | 6.346771 |
| C                | 0.269470                | -1.022134 | 5.241862 |
| C                | 1.890860                | 0.253270  | 3.905870 |
| C                | 2.447399                | 0.756531  | 5.082792 |
| C                | 0.835759                | -0.504401 | 6.447874 |
| H                | 2.289104                | 0.545911  | 2.931857 |
| H                | 3.287942                | 1.450553  | 5.038849 |

|   |           |           |          |
|---|-----------|-----------|----------|
| C | -0.876876 | -2.000488 | 5.121009 |
| C | -3.040058 | -3.818996 | 4.625056 |
| C | -2.234507 | -1.543284 | 5.107337 |
| C | -0.621215 | -3.370299 | 4.794964 |
| C | -1.705493 | -4.240997 | 4.560888 |
| C | -3.279001 | -2.464075 | 4.884509 |
| H | -1.506975 | -5.285101 | 4.308361 |
| H | -4.307563 | -2.096408 | 4.873121 |
| C | 2.621127  | 1.083673  | 7.499520 |
| C | 4.040287  | 2.556190  | 9.496781 |
| C | 2.143635  | 2.349732  | 7.951029 |
| C | 3.881301  | 0.614247  | 7.978251 |
| C | 4.545366  | 1.353268  | 8.980983 |
| C | 2.849256  | 3.048631  | 8.945409 |
| H | 5.505918  | 0.976400  | 9.344144 |
| H | 2.485480  | 4.020301  | 9.283400 |
| C | -2.592611 | -0.059113 | 5.121695 |
| H | -1.792722 | 0.470797  | 5.682121 |
| C | -3.945388 | 0.263469  | 5.782713 |
| H | -4.800699 | -0.057339 | 5.162472 |
| H | -4.034452 | 1.358004  | 5.921244 |
| H | -4.042126 | -0.214361 | 6.768447 |
| C | -2.582602 | 0.510281  | 3.682592 |
| H | -1.609715 | 0.356928  | 3.187970 |
| H | -2.792858 | 1.597217  | 3.699536 |
| H | -3.360743 | 0.022975  | 3.065876 |
| C | 0.791592  | -3.915561 | 4.570861 |
| H | 1.498525  | -3.269233 | 5.112609 |
| C | 0.977996  | -5.358840 | 5.075903 |
| H | 0.478220  | -6.085876 | 4.414829 |
| H | 0.580409  | -5.486404 | 6.086205 |
| H | 2.046971  | -5.617692 | 5.090481 |
| C | 1.150333  | -3.888672 | 3.068093 |
| H | 1.086311  | -2.881792 | 2.636692 |
| H | 0.462350  | -4.541264 | 2.504277 |

|   |           |           |           |
|---|-----------|-----------|-----------|
| H | 2.176080  | -4.263178 | 2.913500  |
| C | -4.187385 | -4.786083 | 4.364462  |
| H | -3.748063 | -5.792641 | 4.254787  |
| C | -5.176707 | -4.832063 | 5.545936  |
| H | -5.687352 | -3.864623 | 5.675778  |
| H | -4.657534 | -5.067582 | 6.486945  |
| H | -5.950730 | -5.597659 | 5.373551  |
| C | -4.917620 | -4.447796 | 3.048242  |
| H | -4.213647 | -4.422925 | 2.201285  |
| H | -5.406598 | -3.461322 | 3.107903  |
| H | -5.697092 | -5.196891 | 2.830806  |
| C | 0.972365  | 3.047178  | 7.258349  |
| H | 0.353365  | 2.292958  | 6.753034  |
| C | 1.514235  | 3.999984  | 6.173318  |
| H | 2.117404  | 4.800245  | 6.630447  |
| H | 0.681585  | 4.470086  | 5.627731  |
| H | 2.144895  | 3.469561  | 5.449298  |
| C | 0.054965  | 3.846140  | 8.195772  |
| H | -0.341738 | 3.223878  | 9.013465  |
| H | -0.798134 | 4.236003  | 7.627519  |
| H | 0.561621  | 4.706420  | 8.655125  |
| C | 4.775090  | 3.344621  | 10.573158 |
| H | 4.096699  | 4.150750  | 10.902802 |
| C | 6.046278  | 4.010157  | 10.006840 |
| H | 5.804493  | 4.648214  | 9.142593  |
| H | 6.772549  | 3.251462  | 9.673281  |
| H | 6.535296  | 4.634406  | 10.773051 |
| C | 5.105094  | 2.483592  | 11.807490 |
| H | 5.839897  | 1.699676  | 11.564869 |
| H | 4.203050  | 1.988603  | 12.199448 |
| H | 5.535584  | 3.107509  | 12.607999 |
| C | 4.683037  | -0.572105 | 7.422411  |
| H | 5.333858  | -0.880885 | 8.254298  |
| C | 5.646049  | -0.104838 | 6.306780  |
| H | 6.334542  | -0.923698 | 6.037995  |

|   |           |           |           |
|---|-----------|-----------|-----------|
| H | 6.250259  | 0.754992  | 6.636898  |
| H | 5.101561  | 0.187286  | 5.397786  |
| C | 3.911558  | -1.828965 | 6.990156  |
| H | 4.608488  | -2.680917 | 6.957681  |
| H | 3.471308  | -1.718635 | 5.990580  |
| H | 3.110122  | -2.083175 | 7.694303  |
| H | 1.042241  | -4.291983 | 12.435354 |
| C | 0.500400  | -3.363158 | 12.249395 |
| C | -0.913760 | -1.018793 | 11.700145 |
| C | 0.557158  | -2.803726 | 10.951105 |
| C | -0.235736 | -2.765934 | 13.272927 |
| C | -0.938978 | -1.593476 | 12.991472 |
| C | -0.159265 | -1.614406 | 10.647262 |
| H | -0.270358 | -3.213911 | 14.268248 |
| H | -1.543293 | -1.112122 | 13.762978 |
| C | 1.365247  | -3.630594 | 9.996857  |
| C | 2.879934  | -5.490754 | 8.473328  |
| C | 2.784718  | -3.647372 | 10.095348 |
| C | 0.703533  | -4.618255 | 9.219410  |
| C | 1.476500  | -5.531667 | 8.479973  |
| C | 3.515400  | -4.546175 | 9.296031  |
| H | 0.977685  | -6.335076 | 7.933647  |
| H | 4.606274  | -4.545534 | 9.361106  |
| C | -1.790613 | 0.195291  | 11.586619 |
| C | -3.562248 | 2.421740  | 11.730658 |
| C | -3.177084 | 0.027588  | 11.316391 |
| C | -1.295500 | 1.474002  | 11.971155 |
| C | -2.187532 | 2.565149  | 12.015303 |
| C | -4.035249 | 1.141088  | 11.399604 |
| H | -1.803126 | 3.553001  | 12.296631 |
| H | -5.100229 | 1.012866  | 11.200329 |
| C | 3.523689  | -2.858578 | 11.179324 |
| H | 2.792073  | -2.228416 | 11.703815 |
| C | 4.612659  | -1.922244 | 10.639331 |
| H | 5.355715  | -2.463062 | 10.032545 |

|   |           |           |           |
|---|-----------|-----------|-----------|
| H | 5.149537  | -1.439064 | 11.472262 |
| H | 4.167753  | -1.133109 | 10.023656 |
| C | 4.120351  | -3.834762 | 12.217992 |
| H | 3.357926  | -4.524593 | 12.610104 |
| H | 4.549752  | -3.276936 | 13.066322 |
| H | 4.923987  | -4.444076 | 11.773759 |
| C | -0.805490 | -4.836971 | 9.338614  |
| H | -1.229304 | -3.990433 | 9.894909  |
| C | -1.537767 | -4.904511 | 7.990229  |
| H | -1.234493 | -5.784206 | 7.402966  |
| H | -1.347584 | -4.015184 | 7.376129  |
| H | -2.623998 | -4.981030 | 8.153210  |
| C | -1.079116 | -6.108991 | 10.170495 |
| H | -0.583334 | -6.057974 | 11.151457 |
| H | -0.707441 | -7.007722 | 9.651873  |
| H | -2.160996 | -6.238100 | 10.335843 |
| C | 3.675670  | -6.515257 | 7.674045  |
| H | 2.958133  | -7.055106 | 7.033063  |
| C | 4.720030  | -5.857324 | 6.753080  |
| H | 5.507228  | -5.354709 | 7.337433  |
| H | 4.255249  | -5.104523 | 6.098907  |
| H | 5.209453  | -6.615457 | 6.119887  |
| C | 4.337318  | -7.551383 | 8.606818  |
| H | 4.854241  | -8.330878 | 8.022715  |
| H | 3.587109  | -8.038896 | 9.249070  |
| H | 5.080823  | -7.071527 | 9.263693  |
| C | -3.772927 | -1.345672 | 11.008793 |
| H | -2.950648 | -2.061369 | 10.888263 |
| C | -4.597911 | -1.367498 | 9.708898  |
| H | -5.461696 | -0.695097 | 9.763530  |
| H | -4.976019 | -2.381845 | 9.519243  |
| H | -3.993328 | -1.064879 | 8.849962  |
| C | -4.627643 | -1.829600 | 12.199842 |
| H | -4.038878 | -1.836909 | 13.127877 |
| H | -5.005001 | -2.848261 | 12.021569 |

|   |           |           |           |
|---|-----------|-----------|-----------|
| H | -5.494406 | -1.169826 | 12.355397 |
| C | -4.509761 | 3.614675  | 11.770942 |
| H | -5.504967 | 3.247318  | 11.462732 |
| C | -4.087393 | 4.705193  | 10.764552 |
| H | -3.991865 | 4.285474  | 9.748060  |
| H | -3.112038 | 5.146282  | 11.035689 |
| H | -4.829619 | 5.521892  | 10.738815 |
| C | -4.644080 | 4.182964  | 13.198818 |
| H | -4.951025 | 3.395708  | 13.906479 |
| H | -5.394770 | 4.991110  | 13.230985 |
| H | -3.685610 | 4.599039  | 13.553542 |
| C | 0.144034  | 1.665316  | 12.451955 |
| H | 0.737479  | 0.804076  | 12.102992 |
| C | 0.175822  | 1.667726  | 13.996600 |
| H | -0.261898 | 0.748518  | 14.412929 |
| H | -0.396464 | 2.525432  | 14.391461 |
| H | 1.213686  | 1.753550  | 14.361185 |
| C | 0.822848  | 2.941588  | 11.922892 |
| H | 1.873601  | 2.971228  | 12.254234 |
| H | 0.336378  | 3.855113  | 12.306248 |
| H | 0.814666  | 2.979816  | 10.826723 |

-----  
-----  
Ar\*-Tl-Sb-Ar\*

| Atomic<br>Number | Coordinates (Angstroms) |           |           |
|------------------|-------------------------|-----------|-----------|
|                  | X                       | Y         | Z         |
| Tl               | 1.524519                | 0.580398  | -0.027187 |
| Sb               | -1.281738               | 0.009486  | 0.443780  |
| H                | -0.323932               | -0.562762 | 5.686688  |
| C                | -0.995329               | -0.778502 | 4.850518  |
| C                | -2.696815               | -1.360792 | 2.695326  |
| C                | -0.626194               | -0.351079 | 3.558222  |
| C                | -2.198975               | -1.469905 | 5.075437  |

|   |           |           |           |
|---|-----------|-----------|-----------|
| C | -3.048580 | -1.764305 | 3.991199  |
| C | -1.498940 | -0.626150 | 2.471622  |
| H | -2.471406 | -1.779133 | 6.087443  |
| H | -3.985439 | -2.304400 | 4.152379  |
| C | 0.700136  | 0.330866  | 3.377091  |
| C | 3.257683  | 1.591713  | 3.223425  |
| C | 0.799090  | 1.748919  | 3.291392  |
| C | 1.883826  | -0.455114 | 3.306236  |
| C | 3.135100  | 0.191138  | 3.233689  |
| C | 2.072376  | 2.351346  | 3.224056  |
| H | 4.048198  | -0.411071 | 3.217586  |
| H | 2.138295  | 3.441762  | 3.197620  |
| C | -3.565090 | -1.642018 | 1.499251  |
| C | -5.266637 | -2.101494 | -0.747130 |
| C | -4.486334 | -0.633124 | 1.064517  |
| C | -3.474831 | -2.871037 | 0.770668  |
| C | -4.332435 | -3.066818 | -0.329008 |
| C | -5.316717 | -0.889413 | -0.044546 |
| H | -4.265184 | -4.016836 | -0.867311 |
| H | -6.034396 | -0.128196 | -0.362779 |
| C | -0.440952 | 2.639971  | 3.316908  |
| H | -1.319474 | 1.985343  | 3.222275  |
| C | -0.474861 | 3.636681  | 2.142215  |
| H | 0.360562  | 4.353849  | 2.184760  |
| H | -1.410547 | 4.217452  | 2.164777  |
| H | -0.432911 | 3.118148  | 1.173665  |
| C | -0.547810 | 3.376500  | 4.668065  |
| H | -0.541311 | 2.663620  | 5.507645  |
| H | -1.480549 | 3.962940  | 4.714384  |
| H | 0.296594  | 4.072861  | 4.806164  |
| C | 1.849945  | -1.980759 | 3.322898  |
| H | 0.798857  | -2.290450 | 3.258620  |
| C | 2.586988  | -2.593572 | 2.116794  |
| H | 3.657001  | -2.332313 | 2.106869  |
| H | 2.154363  | -2.264586 | 1.159858  |



|   |           |           |           |
|---|-----------|-----------|-----------|
| H | 2.517548  | -3.691659 | 2.144814  |
| C | 2.423427  | -2.520493 | 4.649579  |
| H | 1.885467  | -2.096972 | 5.511879  |
| H | 3.489460  | -2.257329 | 4.754995  |
| H | 2.339428  | -3.619086 | 4.692020  |
| C | 4.637417  | 2.237624  | 3.291625  |
| H | 5.377607  | 1.419124  | 3.247988  |
| C | 4.918221  | 3.185141  | 2.112919  |
| H | 4.232155  | 4.045985  | 2.123022  |
| H | 4.798107  | 2.668445  | 1.148687  |
| H | 5.947434  | 3.577042  | 2.169496  |
| C | 4.827707  | 2.969107  | 4.638723  |
| H | 4.650617  | 2.290065  | 5.487717  |
| H | 4.123558  | 3.812559  | 4.729573  |
| H | 5.850899  | 3.372789  | 4.722123  |
| C | -4.673085 | 0.675765  | 1.834689  |
| H | -3.855986 | 0.755020  | 2.566583  |
| C | -6.003444 | 0.639774  | 2.618569  |
| H | -6.863622 | 0.593722  | 1.929626  |
| H | -6.110950 | 1.549020  | 3.233538  |
| H | -6.051388 | -0.238454 | 3.281725  |
| C | -4.608457 | 1.923193  | 0.932652  |
| H | -3.637290 | 1.987295  | 0.420897  |
| H | -4.734746 | 2.833571  | 1.540115  |
| H | -5.402437 | 1.923177  | 0.167985  |
| C | -6.239666 | -2.374715 | -1.887626 |
| H | -6.738386 | -1.417492 | -2.121527 |
| C | -7.329616 | -3.373629 | -1.438232 |
| H | -7.848948 | -3.013218 | -0.535991 |
| H | -6.885365 | -4.354884 | -1.202141 |
| H | -8.077260 | -3.522164 | -2.235818 |
| C | -5.540062 | -2.868474 | -3.168654 |
| H | -5.077891 | -3.857332 | -3.016842 |
| H | -4.749777 | -2.171197 | -3.486539 |
| H | -6.268814 | -2.966037 | -3.990504 |

|   |           |           |           |
|---|-----------|-----------|-----------|
| C | -2.587181 | -4.068230 | 1.137326  |
| H | -2.518518 | -4.656314 | 0.205603  |
| C | -3.306507 | -4.958915 | 2.175723  |
| H | -2.738259 | -5.890237 | 2.340012  |
| H | -4.321047 | -5.225256 | 1.838150  |
| H | -3.389694 | -4.436643 | 3.141118  |
| C | -1.139067 | -3.791074 | 1.580250  |
| H | -0.563521 | -4.730615 | 1.528209  |
| H | -1.094402 | -3.426134 | 2.614381  |
| H | -0.646791 | -3.050104 | 0.935742  |
| H | 2.897841  | -1.262444 | -5.076812 |
| C | 2.382820  | -0.447586 | -4.559013 |
| C | 0.968845  | 1.614133  | -3.231460 |
| C | 2.174069  | -0.523087 | -3.165098 |
| C | 1.924018  | 0.672152  | -5.276204 |
| C | 1.194408  | 1.682168  | -4.624282 |
| C | 1.527252  | 0.541165  | -2.503603 |
| H | 2.114726  | 0.746857  | -6.350341 |
| H | 0.801574  | 2.530107  | -5.192759 |
| C | 2.546112  | -1.772289 | -2.411102 |
| C | 3.254088  | -4.214072 | -1.117709 |
| C | 1.653335  | -2.883144 | -2.432647 |
| C | 3.762944  | -1.872415 | -1.684079 |
| C | 4.095636  | -3.091556 | -1.060108 |
| C | 2.029095  | -4.079593 | -1.793517 |
| H | 5.046073  | -3.177917 | -0.524622 |
| H | 1.348931  | -4.933435 | -1.836495 |
| C | 0.085553  | 2.643937  | -2.569040 |
| C | -1.599632 | 4.680513  | -1.490467 |
| C | 0.646091  | 3.761265  | -1.896633 |
| C | -1.335358 | 2.523373  | -2.650817 |
| C | -2.143291 | 3.543686  | -2.115044 |
| C | -0.204539 | 4.756743  | -1.374902 |
| H | -3.228490 | 3.455592  | -2.200100 |
| H | 0.229998  | 5.632081  | -0.883076 |

|   |           |           |           |
|---|-----------|-----------|-----------|
| C | 0.314248  | -2.832260 | -3.170051 |
| H | 0.146964  | -1.793554 | -3.489412 |
| C | -0.869846 | -3.229226 | -2.267205 |
| H | -0.790201 | -4.272722 | -1.920083 |
| H | -1.819818 | -3.135129 | -2.819033 |
| H | -0.925135 | -2.577543 | -1.382454 |
| C | 0.362770  | -3.710589 | -4.437832 |
| H | 1.195708  | -3.413101 | -5.094100 |
| H | -0.577701 | -3.623431 | -5.007510 |
| H | 0.502904  | -4.773071 | -4.176012 |
| C | 4.748806  | -0.706712 | -1.616691 |
| H | 4.244126  | 0.179539  | -2.032458 |
| C | 5.177400  | -0.376613 | -0.172403 |
| H | 5.739102  | -1.206300 | 0.286115  |
| H | 4.313149  | -0.180483 | 0.484618  |
| H | 5.823983  | 0.515656  | -0.153224 |
| C | 5.981627  | -0.988992 | -2.499598 |
| H | 5.675843  | -1.197749 | -3.536469 |
| H | 6.537404  | -1.865735 | -2.127142 |
| H | 6.667873  | -0.125355 | -2.503984 |
| C | 3.706873  | -5.544952 | -0.526678 |
| H | 4.513020  | -5.322260 | 0.195602  |
| C | 2.595274  | -6.299056 | 0.226971  |
| H | 1.806377  | -6.644582 | -0.461074 |
| H | 2.121519  | -5.664067 | 0.990913  |
| H | 3.009451  | -7.191905 | 0.723929  |
| C | 4.308345  | -6.437547 | -1.636550 |
| H | 4.701236  | -7.379108 | -1.215923 |
| H | 5.127601  | -5.920095 | -2.160568 |
| H | 3.538995  | -6.692497 | -2.384543 |
| C | 2.157106  | 3.958588  | -1.806290 |
| H | 2.636888  | 3.008542  | -2.089957 |
| C | 2.622726  | 4.316429  | -0.384099 |
| H | 2.214570  | 5.283158  | -0.048685 |
| H | 3.720332  | 4.389468  | -0.346717 |

|   |           |           |           |
|---|-----------|-----------|-----------|
| H | 2.305442  | 3.561152  | 0.353153  |
| C | 2.617776  | 5.025891  | -2.819696 |
| H | 2.308130  | 4.752085  | -3.840095 |
| H | 3.715430  | 5.134341  | -2.804018 |
| H | 2.172528  | 6.006304  | -2.581424 |
| C | -2.476432 | 5.835089  | -1.017264 |
| H | -1.828620 | 6.516328  | -0.436785 |
| C | -3.627122 | 5.386400  | -0.097960 |
| H | -3.249778 | 4.819368  | 0.765387  |
| H | -4.341478 | 4.742296  | -0.634831 |
| H | -4.185066 | 6.261905  | 0.274972  |
| C | -3.020558 | 6.627049  | -2.226940 |
| H | -2.199829 | 6.973403  | -2.875197 |
| H | -3.597034 | 7.506710  | -1.892878 |
| H | -3.687319 | 5.994938  | -2.836717 |
| C | -2.003753 | 1.353217  | -3.375724 |
| H | -1.276091 | 0.527521  | -3.413425 |
| C | -2.351158 | 1.755557  | -4.825873 |
| H | -1.462886 | 2.099099  | -5.374178 |
| H | -3.088739 | 2.576193  | -4.824319 |
| H | -2.789487 | 0.902986  | -5.371735 |
| C | -3.274562 | 0.830506  | -2.678232 |
| H | -3.623870 | -0.090041 | -3.171452 |
| H | -4.100074 | 1.559470  | -2.725522 |
| H | -3.101198 | 0.600698  | -1.617781 |

-----  
 -----  
 Tl-Sb(Ar\*)<sub>2</sub>

| Atomic<br>Number | Coordinates (Angstroms) |           |          |
|------------------|-------------------------|-----------|----------|
|                  | X                       | Y         | Z        |
| Sb               | 3.156800                | -3.537868 | 7.131543 |
| Tl               | 1.165964                | -1.716968 | 8.204300 |
| H                | -0.108454               | -0.167465 | 3.296198 |

|   |           |           |          |
|---|-----------|-----------|----------|
| C | 0.467081  | 0.135515  | 4.175622 |
| C | 1.842553  | 0.984257  | 6.472813 |
| C | 0.177688  | -0.465757 | 5.424996 |
| C | 1.460907  | 1.106339  | 4.049387 |
| C | 2.126397  | 1.532682  | 5.196417 |
| C | 0.872007  | -0.049855 | 6.605292 |
| H | 1.684570  | 1.551492  | 3.076667 |
| H | 2.867067  | 2.333927  | 5.123261 |
| C | -0.975889 | -1.421104 | 5.376835 |
| C | -3.249231 | -3.111456 | 5.009417 |
| C | -2.301900 | -0.897576 | 5.500703 |
| C | -0.814311 | -2.783424 | 4.994235 |
| C | -1.951107 | -3.597356 | 4.830127 |
| C | -3.405455 | -1.755033 | 5.329177 |
| H | -1.825561 | -4.633739 | 4.520373 |
| H | -4.412957 | -1.345807 | 5.416654 |
| C | 2.485739  | 1.755775  | 7.588752 |
| C | 3.614627  | 3.521252  | 9.534564 |
| C | 1.808218  | 2.963773  | 7.970157 |
| C | 3.783477  | 1.511578  | 8.112280 |
| C | 4.296150  | 2.383850  | 9.096708 |
| C | 2.381845  | 3.808380  | 8.935432 |
| H | 5.290565  | 2.184511  | 9.494020 |
| H | 1.876868  | 4.738582  | 9.202592 |
| C | -2.567461 | 0.604228  | 5.661627 |
| H | -1.619513 | 1.108637  | 5.890317 |
| C | -3.525241 | 0.940613  | 6.812713 |
| H | -4.526952 | 0.511023  | 6.662930 |
| H | -3.644095 | 2.031348  | 6.898260 |
| H | -3.131399 | 0.571809  | 7.763995 |
| C | -3.091599 | 1.194422  | 4.336776 |
| H | -2.404927 | 0.984066  | 3.503635 |
| H | -3.202406 | 2.287418  | 4.421446 |
| H | -4.076587 | 0.776220  | 4.075155 |
| C | 0.545155  | -3.352210 | 4.576464 |

|   |           |           |           |
|---|-----------|-----------|-----------|
| H | 1.340244  | -2.682744 | 4.962935  |
| C | 0.840502  | -4.770221 | 5.095400  |
| H | 0.173578  | -5.511626 | 4.644988  |
| H | 0.733705  | -4.839280 | 6.171191  |
| H | 1.862511  | -5.051835 | 4.824541  |
| C | 0.675334  | -3.339356 | 3.037610  |
| H | 0.521630  | -2.330640 | 2.623851  |
| H | -0.062773 | -4.010998 | 2.571847  |
| H | 1.680869  | -3.682486 | 2.735502  |
| C | -4.444410 | -4.028434 | 4.793807  |
| H | -4.054439 | -5.034199 | 4.568982  |
| C | -5.313420 | -4.146985 | 6.056291  |
| H | -5.751294 | -3.177544 | 6.335318  |
| H | -4.719383 | -4.504932 | 6.907677  |
| H | -6.139182 | -4.855263 | 5.890693  |
| C | -5.284020 | -3.582062 | 3.583681  |
| H | -4.662001 | -3.509882 | 2.679557  |
| H | -5.743187 | -2.597073 | 3.756147  |
| H | -6.093867 | -4.301662 | 3.389316  |
| C | 0.550941  | 3.467611  | 7.246036  |
| H | 0.217344  | 2.705800  | 6.531597  |
| C | 0.874871  | 4.735268  | 6.429282  |
| H | 1.130666  | 5.584028  | 7.082657  |
| H | 0.003460  | 5.031732  | 5.823916  |
| H | 1.722535  | 4.567528  | 5.748725  |
| C | -0.637138 | 3.717964  | 8.180941  |
| H | -0.928948 | 2.793880  | 8.691181  |
| H | -1.502928 | 4.073964  | 7.602030  |
| H | -0.417321 | 4.480888  | 8.941912  |
| C | 4.223226  | 4.494444  | 10.534306 |
| H | 3.402675  | 5.117053  | 10.926247 |
| C | 5.222713  | 5.431459  | 9.830444  |
| H | 4.741801  | 5.970755  | 9.001538  |
| H | 6.066734  | 4.860933  | 9.414630  |
| H | 5.626969  | 6.172786  | 10.536591 |

|   |           |           |           |
|---|-----------|-----------|-----------|
| C | 4.884529  | 3.799573  | 11.735935 |
| H | 5.792051  | 3.255103  | 11.440253 |
| H | 4.199504  | 3.083473  | 12.209375 |
| H | 5.179684  | 4.544627  | 12.489356 |
| C | 4.782679  | 0.414297  | 7.701117  |
| H | 5.746463  | 0.944852  | 7.656476  |
| C | 4.652054  | -0.225851 | 6.319488  |
| H | 5.510860  | -0.892153 | 6.148601  |
| H | 4.651164  | 0.525565  | 5.516042  |
| H | 3.742855  | -0.843914 | 6.206185  |
| C | 4.947159  | -0.656234 | 8.793078  |
| H | 5.715584  | -1.363844 | 8.492993  |
| H | 4.025463  | -1.205516 | 8.969506  |
| H | 5.253582  | -0.210065 | 9.741556  |
| H | 0.897520  | -4.602069 | 12.698118 |
| C | 0.570432  | -3.633581 | 12.308121 |
| C | -0.407978 | -1.251483 | 11.191572 |
| C | 0.860247  | -3.310749 | 10.961008 |
| C | -0.173193 | -2.774423 | 13.109878 |
| C | -0.669751 | -1.609208 | 12.540141 |
| C | 0.396579  | -2.087537 | 10.377787 |
| H | -0.402874 | -3.033606 | 14.144155 |
| H | -1.306300 | -0.953448 | 13.135506 |
| C | 1.493213  | -4.453792 | 10.232166 |
| C | 2.625494  | -6.812125 | 9.058795  |
| C | 2.892085  | -4.734898 | 10.386322 |
| C | 0.668555  | -5.402682 | 9.549711  |
| C | 1.257616  | -6.530855 | 8.943057  |
| C | 3.420173  | -5.919177 | 9.811226  |
| H | 0.627167  | -7.236447 | 8.398509  |
| H | 4.495433  | -6.132481 | 9.929069  |
| C | -1.236426 | -0.066489 | 10.796274 |
| C | -3.186872 | 1.997087  | 10.711043 |
| C | -2.585051 | -0.358087 | 10.430340 |
| C | -0.855894 | 1.272124  | 11.123238 |

|   |           |           |           |
|---|-----------|-----------|-----------|
| C | -1.856784 | 2.264872  | 11.079901 |
| C | -3.526600 | 0.685841  | 10.373667 |
| H | -1.610282 | 3.288437  | 11.351798 |
| H | -4.562660 | 0.462375  | 10.109831 |
| C | 3.839081  | -3.828162 | 11.176613 |
| H | 3.363766  | -2.835855 | 11.252532 |
| C | 5.217833  | -3.637756 | 10.510474 |
| H | 5.845882  | -4.537318 | 10.620017 |
| H | 5.753215  | -2.806269 | 10.986462 |
| H | 5.122814  | -3.429982 | 9.443666  |
| C | 4.039443  | -4.369273 | 12.606974 |
| H | 3.084102  | -4.467487 | 13.145151 |
| H | 4.693156  | -3.695800 | 13.186228 |
| H | 4.516106  | -5.366526 | 12.577792 |
| C | -0.856838 | -5.285993 | 9.532179  |
| H | -1.145895 | -4.361084 | 10.042190 |
| C | -1.444087 | -5.221864 | 8.114091  |
| H | -1.200768 | -6.115531 | 7.526902  |
| H | -1.079030 | -4.350958 | 7.567487  |
| H | -2.538427 | -5.145650 | 8.162858  |
| C | -1.486449 | -6.444663 | 10.330542 |
| H | -1.073140 | -6.490087 | 11.349641 |
| H | -1.303398 | -7.417203 | 9.848671  |
| H | -2.576102 | -6.308271 | 10.406954 |
| C | 3.225268  | -8.042620 | 8.397620  |
| H | 2.401795  | -8.577988 | 7.893280  |
| C | 4.256480  | -7.663048 | 7.319672  |
| H | 5.129143  | -7.151272 | 7.760627  |
| H | 3.816857  | -6.986969 | 6.571660  |
| H | 4.620447  | -8.564731 | 6.801165  |
| C | 3.828396  | -9.001530 | 9.439438  |
| H | 4.176709  | -9.929294 | 8.956863  |
| H | 3.082029  | -9.268134 | 10.206050 |
| H | 4.691297  | -8.544382 | 9.954292  |
| C | -3.107081 | -1.789362 | 10.250587 |



|   |           |           |           |
|---|-----------|-----------|-----------|
| H | -2.274219 | -2.490747 | 10.365467 |
| C | -3.695780 | -2.039465 | 8.855778  |
| H | -4.551936 | -1.383477 | 8.643263  |
| H | -4.046337 | -3.077475 | 8.773739  |
| H | -2.944095 | -1.873819 | 8.077251  |
| C | -4.137627 | -2.144945 | 11.341958 |
| H | -3.731335 | -1.968037 | 12.348025 |
| H | -4.418110 | -3.207460 | 11.268445 |
| H | -5.059685 | -1.551795 | 11.240679 |
| C | -4.250290 | 3.085742  | 10.714473 |
| H | -5.192870 | 2.626899  | 10.371633 |
| C | -3.915982 | 4.224798  | 9.737726  |
| H | -3.763016 | 3.836507  | 8.721275  |
| H | -2.999835 | 4.755068  | 10.036636 |
| H | -4.735209 | 4.959616  | 9.707405  |
| C | -4.494396 | 3.628177  | 12.133960 |
| H | -4.750613 | 2.813441  | 12.827335 |
| H | -5.322213 | 4.354335  | 12.133130 |
| H | -3.600950 | 4.136759  | 12.526960 |
| C | 0.585804  | 1.672317  | 11.521891 |
| H | 1.230292  | 1.437639  | 10.660618 |
| C | 1.160284  | 0.931894  | 12.753240 |
| H | 1.470246  | -0.091878 | 12.526200 |
| H | 0.430558  | 0.903828  | 13.575163 |
| H | 2.052906  | 1.459221  | 13.123197 |
| C | 0.747880  | 3.178501  | 11.811223 |
| H | 1.802471  | 3.403353  | 12.013472 |
| H | 0.175958  | 3.473989  | 12.705272 |
| H | 0.435027  | 3.809185  | 10.973218 |

-----  
-----
